# Supplementary material for: Health effects of climate change: an overview of systematic reviews
Source: PubMed Central journal article supplement — BMJ Open. 2021 Jun 9;11(6):e046333. doi: 10.1136/bmjopen-2020-046333 (PMC8191619; doi:10.1136/bmjopen-2020-046333), 2021-06-09
Supplement: bmjopen-2020-046333.draft_revisions.pdf [file bmjopen-2020-046333.draft_revisions.pdf]

# BMJ Open

BMJ Open is committed to open peer review. As part of this commitment we make the peer review history of every article we publish publicly available.

When an article is published we post the peer reviewers' comments and the authors' responses online. We also post the versions of the paper that were used during peer review. These are the versions that the peer review comments apply to.

The versions of the paper that follow are the versions that were submitted during the peer review process. They are not the versions of record or the final published versions. They should not be cited or distributed as the published version of this manuscript.

BMJ Open is an open access journal and the full, final, typeset and author-corrected version of record of the manuscript is available on our site with no access controls, subscription charges or pay-per-view fees (<http://bmjopen.bmj.com>).

If you have any questions on BMJ Open's open peer review process please email [info.bmjopen@bmj.com](mailto:info.bmjopen@bmj.com)

# BMJ Open

## The Health Effects of Climate Change: An Overview of Systematic Reviews

|                               |                                                                                                                                                                                                                                                                                                                                                                                                                                                                                                                                                                                                                                                                                                                                             |
|-------------------------------|---------------------------------------------------------------------------------------------------------------------------------------------------------------------------------------------------------------------------------------------------------------------------------------------------------------------------------------------------------------------------------------------------------------------------------------------------------------------------------------------------------------------------------------------------------------------------------------------------------------------------------------------------------------------------------------------------------------------------------------------|
| Journal:                      | <i>BMJ Open</i>                                                                                                                                                                                                                                                                                                                                                                                                                                                                                                                                                                                                                                                                                                                             |
| Manuscript ID                 | bmjopen-2020-046333                                                                                                                                                                                                                                                                                                                                                                                                                                                                                                                                                                                                                                                                                                                         |
| Article Type:                 | Original research                                                                                                                                                                                                                                                                                                                                                                                                                                                                                                                                                                                                                                                                                                                           |
| Date Submitted by the Author: | 27-Oct-2020                                                                                                                                                                                                                                                                                                                                                                                                                                                                                                                                                                                                                                                                                                                                 |
| Complete List of Authors:     | Rocque, Rhea; The University of Winnipeg<br>Beaudoin, Caroline; Université Laval, Faculty of Medicine<br>Ndjaboue, Ruth; Université Laval, Faculty of Medicine; VITAM Research Centre for Sustainable Health<br>Cameron, Laura; The University of Winnipeg<br>Poirier-Bergeron, Louann; Université Laval, Faculty of Medicine<br>Poulin-Rheault, Rose-Alice; Université Laval, Faculty of Medicine<br>Fallon, Catherine; Université Laval, Faculty of Medicine; CHUQ Research Centre<br>Tricco, Andrea; Li Ka Shing Knowledge Institute, ; University of Toronto, Institute for Health Policy, Management, and Evaluation<br>Witteman, Holly; Laval University, Family and Emergency Medicine; VITAM Research Centre for Sustainable Health |
| Keywords:                     | PUBLIC HEALTH, SOCIAL MEDICINE, Public health < INFECTIOUS DISEASES                                                                                                                                                                                                                                                                                                                                                                                                                                                                                                                                                                                                                                                                         |
|                               |                                                                                                                                                                                                                                                                                                                                                                                                                                                                                                                                                                                                                                                                                                                                             |

SCHOLARONE™  
Manuscripts

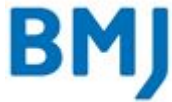

I, the Submitting Author has the right to grant and does grant on behalf of all authors of the Work (as defined in the below author licence), an exclusive licence and/or a non-exclusive licence for contributions from authors who are: i) UK Crown employees; ii) where BMJ has agreed a CC-BY licence shall apply, and/or iii) in accordance with the terms applicable for US Federal Government officers or employees acting as part of their official duties; on a worldwide, perpetual, irrevocable, royalty-free basis to BMJ Publishing Group Ltd ("BMJ") its licensees and where the relevant Journal is co-owned by BMJ to the co-owners of the Journal, to publish the Work in this journal and any other BMJ products and to exploit all rights, as set out in our [licence](#).

The Submitting Author accepts and understands that any supply made under these terms is made by BMJ to the Submitting Author unless you are acting as an employee on behalf of your employer or a postgraduate student of an affiliated institution which is paying any applicable article publishing charge ("APC") for Open Access articles. Where the Submitting Author wishes to make the Work available on an Open Access basis (and intends to pay the relevant APC), the terms of reuse of such Open Access shall be governed by a Creative Commons licence – details of these licences and which [Creative Commons](#) licence will apply to this Work are set out in our licence referred to above.

Other than as permitted in any relevant BMJ Author's Self Archiving Policies, I confirm this Work has not been accepted for publication elsewhere, is not being considered for publication elsewhere and does not duplicate material already published. I confirm all authors consent to publication of this Work and authorise the granting of this licence.

# The Health Effects of Climate Change: An Overview of Systematic Reviews

Rh ea Rocque, PhD<sup>1</sup>, Caroline Beaudoin, DEC<sup>2</sup>, Ruth Ndjaboue, MPH, PhD<sup>2,3</sup>, Laura Cameron, MA<sup>1</sup>, Louann Poirier Bergeron, DES<sup>2</sup>, Rose-Alice Poulin-Rheault, DEC<sup>2</sup>, Catherine Fallon, MSc<sup>2,4</sup>, Andrea C. Tricco, PhD<sup>5,6</sup>, Holly O. Witteman, PhD<sup>2,3,4</sup>

<sup>1</sup>Prairie Climate Centre, University of Winnipeg, Winnipeg

<sup>2</sup>Faculty of Medicine, Laval University, Quebec City

<sup>3</sup>VITAM Research Centre for Sustainable Health, Quebec City

<sup>4</sup>Research Centre of the CHU de Qu ebec-Laval University, Quebec City

<sup>5</sup>Li Ka Shing Knowledge Institute, Unity Health Toronto, Toronto

<sup>6</sup>Dalla Lana School of Public Health, University of Toronto, Toronto

Corresponding author:

Rh ea Rocque – rhea.rocque@gmail.com

## Abstract

**Objectives:** In this study, we aimed to develop a synthesis of systematic reviews of health impacts of climate change. Our research objectives were to synthesize studies' characteristics such as geographical regions, years of publication, and authors' affiliations, to map the climate impacts, health outcomes, and combinations of these that have been studied, and to synthesize key findings.

**Design:** We conducted an overview of systematic reviews of health impacts of climate change. We registered our review in PROSPERO (CRD42019145972). We systematically searched the literature using a predefined search strategy, inclusion, and exclusion criteria. We included systematic reviews that explored at least one health impact of climate change. We organized systematic reviews according to their key characteristics, including geographical regions, year of publication and authors' affiliations. We mapped the climate effects and health outcomes being studied and synthesized major findings. No ethical approval was required since we used secondary data. Additional data is not available.

**Results:** We included ninety-four systematic reviews. Most were published after 2015 and approximately one fifth contained meta-analyses. Reviews synthesized evidence about five categories of climate impacts; the two most common were meteorological and extreme weather events. Reviews covered ten health outcome categories; the three most common were 1) infectious diseases, 2) mortality, and 3) respiratory, cardiovascular, cardiopulmonary or neurological outcomes. Most reviews suggested a deleterious impact of climate change on multiple adverse health outcomes, although the majority also called for more research.

**Conclusion:** Overall, most systematic reviews suggest that climate change is associated with worse human health. Future research could explore the potential explanations between these

1  
2  
3  
4  
5  
6  
7  
8  
9  
10  
11  
12  
13  
14  
15  
16  
17  
18  
19  
20  
21  
22  
23  
24  
25  
26  
27  
28  
29  
30  
31  
32  
33  
34  
35  
36  
37  
38  
39  
40  
41  
42  
43  
44  
45  
46  
47  
48  
49  
50  
51  
52  
53  
54  
55  
56  
57  
58  
59  
60

associations to propose adaptation and mitigation strategies and could include psychological and broader social health impacts of climate change.

Funding: This work was supported by Canadian Institutes of Health Research FDN-148426

For peer review only

## Keywords

Health; Climate Change; Overview of Systematic Reviews; Extreme Weather Events; Air Quality; Global Warming

## Strengths and limitations of this study

- A strength of this study is that it provides the first broad overview of previous systematic reviews exploring the health impacts of climate change.
- By targeting systematic reviews, we achieve a higher-order summary of findings than what would have been possible by consulting individual original studies.
- By synthesizing findings across all included studies and according to the combination of climate impact and health outcome, we offer a clear, detailed, and unique summary of the current state of evidence and knowledge gaps about how climate change may influence human health.
- A limitation of this study is that we were unable to access some full texts and therefore some studies were excluded, even though we deemed them potentially relevant after title and abstract inspection.
- Another limitation is that we could not conduct meta-meta-analyses of findings across reviews, due to the heterogeneity of the included systematic reviews and the relatively small proportion of studies reporting meta-analytic findings.

## Summary boxes

### What is already known on this topic?

Multiple studies have documented an association between climate change (and its related environmental consequences) and various human health impacts. But to better understand the multiple health impacts of climate change and to identify gaps in previous literature, we need a detailed over-arching overview of the current literature investigating the climate-health association.

### What this study adds?

This study provides an up to date detailed overview of previous systematic reviews of health impacts of climate change based on a rigorous and consistent mapping of the key characteristics and findings of included reviews. Overall, most systematic reviews suggest a deleterious impact of climate change (and its related environmental consequences) on multiple adverse health outcomes. This study allows to guide health adaptation and to identify key gaps in literature.

## Introduction

The environmental consequences of climate change such as rising temperatures, more extreme weather events, and increased droughts and flooding are impacting human health and lives.<sup>1,2</sup>

1  
2  
3 Previous studies and reviews have documented the health impacts of climate change; however,  
4 they have focused on specific climate effects,<sup>3,4</sup> health impacts,<sup>5,6</sup> countries,<sup>7-9</sup> or are no longer  
5 up to date.<sup>10,11</sup> To guide future research and action to mitigate and adapt to the health impacts  
6 of climate change and its environmental consequences, we need a complete and thorough  
7 overview of the research already conducted. In this study, we aimed to develop such a  
8 synthesis of systematic reviews of health impacts of climate change. Our research objectives  
9 were to synthesize studies' characteristics such as geographical regions, years of publication,  
10 and authors' affiliations, to map the climate impacts, health outcomes, and combinations of  
11 these that have been studied, and to synthesize key findings.  
12  
13  
14  
15

## 16 Methods

17  
18 We applied the Cochrane method for overviews of reviews.<sup>12</sup> This method is designed to  
19 systematically map the themes of studies on a topic and synthesize findings to achieve a  
20 broader overview of the available literature on the topic.  
21  
22

## 23 Research questions

24 Our research questions were the following: 1) What is known about the relationship between  
25 climate change and health, as shown in previous systematic reviews? 2) What are the  
26 characteristics of these studies? We registered our plan (CRD42019145972<sup>13</sup>) in PROSPERO,  
27 an international prospective register of systematic reviews and followed PRISMA 2020<sup>14</sup> to  
28 report our findings, as a reporting guideline for overviews is still in development.<sup>15</sup>  
29  
30  
31

## 32 Search strategy and selection criteria

33  
34 To identify relevant studies, we used a systematic search strategy. We included studies in this  
35 review if they 1) were systematic reviews of original research and 2) reported at least one health  
36 impact as it related (directly or indirectly) to climate change.  
37  
38

39 We defined a systematic review, based on Cochrane's definition, as a review of the literature in  
40 which one "attempts to identify, appraise and synthesize all the empirical evidence that meets  
41 pre-specified eligibility criteria to answer a specific research question [by] us[ing] explicit,  
42 systematic methods that are selected with a view aimed at minimizing bias, to produce more  
43 reliable findings to inform decision making."<sup>16</sup> We included systematic reviews of original  
44 research, with or without meta-analyses. We excluded narrative reviews, non-systematic  
45 literature reviews and systematic reviews of materials that were not original research (e.g.,  
46 systematic reviews of guidelines.)  
47  
48

49 We based our definition of health impacts on the World Health Organization's (WHO) definition  
50 of health as, "a state of complete physical, mental and social well-being and not merely the  
51 absence of disease or infirmity."<sup>17</sup> Therefore, health impacts included, among others, morbidity,  
52 mortality, new conditions, worsening/improving conditions, injuries, and psychological well-  
53 being. Climate change (or global warming) could be referred to directly or indirectly, for  
54 instance, by synthesizing the direct or indirect health effects of temperature rises or of natural  
55  
56  
57  
58  
59  
60

1  
2  
3 conditions/disasters made more likely by climate change (e.g., floods, wildfires, temperature  
4 variability, droughts.) We included systematic reviews whose main focus was not the health  
5 impacts of climate change, providing they reported at least one result regarding health effects  
6 related to climate change (or consequences of climate change.)  
7

8  
9 On June 22, 2019, we retrieved systematic reviews regarding the health effects of climate  
10 change by searching the electronic databases Medline, CINAHL, Embase, Cochrane, Web of  
11 Science using a structured search (see Appendix 1 for final search strategy developed by a  
12 librarian.) We did not apply language restrictions. After removing duplicates, we imported  
13 references into Covidence.<sup>18</sup>  
14  
15

## 16 17 Screening process

18 To select studies, we first screened titles and abstracts to eliminate articles that did not meet our  
19 inclusion criteria. Two trained analysts independently screened each article. A senior analyst  
20 resolved any conflict or disagreement. Because the topic was new to some team members, to  
21 ensure a high-quality screening process, the trained analysts then re-screened all included  
22 records and the senior analyst re-screened all excluded records. Two analysts then  
23 independently screened the full text of retained articles, again with a senior analyst resolving  
24 disagreements.  
25  
26

## 27 28 Data extraction

29  
30 Next, we decided on key information that needed to be extracted from studies. We extracted the  
31 first author's name, year of publication, number of studies included, time frame (in years) of the  
32 studies included in the article, first author's institution's country affiliation, whether the  
33 systematic review included a meta-analysis, geographical focus, population focus, the climate  
34 impact(s) and the health outcome(s) as well as the main findings and limitations of each  
35 systematic review.  
36  
37

38  
39 Two or more trained analysts (RR, CB, RN, LC, LPB, RAPR) independently extracted data,  
40 using Covidence and spreadsheet software (Google Sheets). For analysts who were new to  
41 evidence syntheses (CB, LPB, RAPR), the training process included extracting data repeatedly  
42 from the same articles to ensure accurate understanding, weekly group meetings to clarify  
43 understanding, and daily supervision by more senior team members (RR, RN, HOW). An  
44 additional trained analyst from the group or senior research team member resolved  
45 disagreements between individual judgments.  
46  
47

## 48 49 Coding and Data Mapping

50 To summarize findings from previous reviews, we used a three-step procedure for coding and  
51 data mapping. First, to map articles according to climate impacts and health outcomes, two  
52 researchers (RR and LC) consulted the titles and abstracts of each article. We developed the  
53 categories for climate impacts separately from those for health outcomes and used a mixed  
54 approach to coding. We started with an inductive coding method, by identifying categories  
55 directly based on our data and followed up with a deductive approach to finalize categories by  
56  
57  
58  
59  
60



1  
2  
3 consulting previous conceptual frameworks of climate impacts and health outcomes.<sup>1,2,19</sup> The  
4 same two researchers independently coded each article according to their climate impact and  
5 health outcome. We then compared coding and resolved disagreements through discussion.  
6  
7

8 Next, still using spreadsheet software, we created a matrix to map articles according to their  
9 combination of climate impacts and health outcomes. Each health outcome occupied one row,  
10 whereas climate impacts each occupied one column. We placed each article in the matrix  
11 according to the combination(s) of their climate impact(s) and health outcome(s). For instance, if  
12 we coded an article as 'extreme weather' for climate and 'mental health' for health impact, we  
13 noted it in the cell at the intersection of these two codes. We calculated frequencies for each cell  
14 to identify frequent combinations and gaps in literature. Because one study could investigate  
15 more than one climate impact and health outcome, the frequency counts for each category  
16 could exceed the number of studies included in this review.  
17  
18

19  
20 Finally, we summarized findings of the studies individually according to their combination of  
21 climate impacts and health outcomes. We re-read the Results and Discussion sections of each  
22 article as part of this step. We first wrote an individual summary for each study, then we collated  
23 the summaries of all studies exploring the same combination of categories to develop an overall  
24 summary of findings for each combination of categories.  
25  
26

## 27 28 Quality assessment

29 We used a modified version of AMSTAR-2 to assess the quality of the included systematic  
30 reviews (Appendix 2). Since AMSTAR-2 was developed for syntheses of systematic reviews of  
31 randomized controlled trials, working with a team member with expertise in knowledge synthesis  
32 (AT), we adapted it to suit a research context that is not amenable to randomized controlled  
33 trials. We used items 5, 6, 10, 11, 12, 14, 15, 16 without modification and modified items 1 to 4,  
34 7 to 9 and 13.  
35  
36  
37

## 38 Patient and Public Involvement

39 Patients and members of the public were not involved in this study.  
40  
41  
42  
43

## 44 Results

### 45 46 Articles identified

47 As shown in the PRISMA diagram in Figure 1, from an initial set of 2619 references, we retained  
48 94 for inclusion.  
49  
50  
51

52 **Insert Figure 1 About Here**  
53  
54  
55  
56  
57  
58  
59  
60

## Study Descriptions

A detailed table of all articles and their characteristics can be found in Appendix 3. Publication years ranged from 2007 to 2019 (year of data extraction), with the great majority of included articles (n = 69; 73%) published since 2015 (Figure 2). A median of 30 studies had been included in the systematic reviews (mean = 60; SD = 49; range 7 to 722). Approximately one fifth of the systematic reviews included meta-analyses of their included studies (n = 18; 19%). The majority of included systematic reviews' first authors had affiliations in high-income countries, with the largest representations by continent in Europe (n = 30) and Australia (n = 24) (Figure 3).

**Insert Figure 2 About Here**

**Insert Figure 3 About Here**

Regarding the geographical focus of systematic reviews, most of the included studies (n = 68; 72%) had a global focus or no specified geographical limitations and therefore included studies published anywhere in the world. The remaining systematic reviews either targeted certain countries (n = 12) (1 for each Australia, Germany, Iran, India, Ethiopia, Malaysia, Nepal, New Zealand and 2 reviews focused on China and the United States), continents (n = 5) (3 focused on Europe and 2 on Asia), or regions according to geographical location (n = 6) (1 focused on Sub-Saharan Africa, 1 on Eastern Mediterranean countries, 1 on Tropical countries, and 3 focused on the Arctic), or according to the country's level of income (n = 3) (2 on low to middle income countries, 1 on high income countries).

Regarding specific populations of interest, most of the systematic reviews did not define a specific population of interest (n = 69; 73%). For the studies that specified a population of interest (n = 25; 26.6%), the most frequent populations were children (n = 7) and workers (n = 6), followed by vulnerable or susceptible populations more generally (n = 4), the elderly (n = 3), pregnant people (n = 2), people with disabilities or chronic illnesses (n = 2) and rural populations (n = 1).

## Quality assessment

We assessed studies for quality according to our revised AMSTAR-2. Out of 94 systematic reviews, the most commonly fully satisfied criterion was #1 (PICO components) with 81/94 (86%) of included systematic reviews fully satisfying this criterion. The next most commonly-satisfied criteria were #16 (potential sources of conflict of interest reported) (78/94 = 83% fully), #13 (account for limitations in individual studies) (70/94 = 75% fully and 2/94 = 2% partially), #7 (explain both inclusion and exclusion criteria) (64/94 = 68% fully and 19/94 = 20% partially), #8 (description of included studies in adequate detail) (36/94 = 38% fully and 41/94 = 44% partially), and #4 (use of a comprehensive literature search strategy) (0/94 = 0% fully and 80/94 = 85% partially). For criteria #11, #12, and #15, which only applied to reviews including meta-analyses, 17/18 (94%) fully satisfied criterion #11 (use of an appropriate methods for statistical combination of results), 12/18 (67%) fully satisfied criterion #12 (assessment of the potential

1  
2  
3 impact of RoB in individual studies) (1/18 = 6% partially), and 11/18 (61%) fully satisfied  
4 criterion #15 (an adequate investigation of publication bias, small study bias). Full details are  
5 available in Appendix 4.  
6  
7

## 8 Climate Impacts and Health Outcomes 9

10 For both the climate impacts and health outcomes, systematic reviews could have a general or  
11 a specific focus. A general focus consisted of investigating the general impacts of climate  
12 change or multiple impacts simultaneously, whereas a specific focus targeted specifically only  
13 one climate impact or health outcome. When combining the climate impact to the health  
14 outcome, four combinations became apparent. Table 1 shows these four combinations with  
15 sample titles of systematic reviews within that combination. The most frequent combination (n =  
16 52; 55%) consisted of studies investigating a specific climate impact on a specific health  
17 outcome (e.g., the impact of floods on mental health) and the least frequent combination (n = 5;  
18 5%) consisted of studies exploring general or multiple climate impacts' effects on multiple health  
19 outcomes (e.g., health impacts of climate change.)  
20  
21  
22

23 **Table 1. Summary of the four scenarios possible when combining climate impact and**  
24 **health outcome categories with frequencies and examples of paper titles.**  
25

| Frequency (%)<br>and Example<br>Titles |                                       | Health Outcome                                                                                                                                                                                                                                                             |                                                                                                                                                                                                                                                                |
|----------------------------------------|---------------------------------------|----------------------------------------------------------------------------------------------------------------------------------------------------------------------------------------------------------------------------------------------------------------------------|----------------------------------------------------------------------------------------------------------------------------------------------------------------------------------------------------------------------------------------------------------------|
|                                        |                                       | Multiple (n = 29)                                                                                                                                                                                                                                                          | Specific (n = 65)                                                                                                                                                                                                                                              |
| Climate<br>Impact                      | General<br>or<br>multiple<br>(n = 18) | n = 5 (5%)<br><br>E.g., "Health Impact of Climate<br>Change in Older People: An<br>Integrative Review and<br>Implications for Nursing," <sup>20</sup> and,<br>"Climate Change and Health in the<br>Eastern Mediterranean Countries:<br>A Systematic Review." <sup>21</sup> | n = 13 (14%)<br><br>E.g., "Global Warming and<br>Obesity," <sup>22</sup> and, "Systematic<br>Review of Current Efforts to<br>Quantify the Impacts of Climate<br>Change on Undernutrition." <sup>23</sup>                                                       |
|                                        | Specific<br>(n = 76)                  | n = 24 (26%)<br><br>E.g., "Floods and Human Health: A<br>Systematic Review," <sup>3</sup> and, "Health<br>Effects of Drought: A Systematic<br>Review of the Evidence." <sup>24</sup>                                                                                       | n = 52 (55%)<br><br>E.g., "The Mental Health<br>Outcomes of Drought: A<br>Systematic Review and Causal<br>Process Diagram," <sup>25</sup> and, "The<br>Association between Ambient<br>Temperature and Childhood<br>Asthma: A Systematic Review." <sup>26</sup> |

26  
27  
28  
29  
30  
31  
32  
33  
34  
35  
36  
37  
38  
39  
40  
41  
42  
43  
44  
45  
46  
47  
48  
49  
50  
51  
52  
53 Regarding climate impacts, we identified five mutually exclusive categories, with 13 publications  
54 targeting more than one category of climate impacts: 1) Meteorological (n = 71 papers) (e.g.,  
55 temperature, heat waves, humidity, precipitation), 2) Extreme weather (n = 24) (e.g., water-  
56  
57  
58  
59  
60

1  
2  
3 related, floods, cyclones, hurricanes, drought), 3) Air quality (n = 7) (e.g., air pollution and  
4 wildfire smoke exposure), 4) General (n = 5), and 5) Other (n = 3). “General” climate impacts  
5 included articles that did not specify climate change impacts but stated general climate change  
6 as their focus. “Other” climate impacts included studies investigating other effects indirectly  
7 related to climate change (e.g., impact of environmental contaminants) or general environmental  
8 risk factors (e.g., environmental hazards, sanitation, and access to clean water.)  
9  
10

11 We identified ten categories to describe the health outcomes studied by the systematic reviews,  
12 and 29 publications targeted more than one category of health outcomes: 1) Infectious diseases  
13 (n = 41 papers) (vector-, food- and water-borne), 2) Mortality (n = 32), 3) Respiratory,  
14 cardiovascular, cardiopulmonary and neurological (n = 22), 4) Healthcare systems (n = 16) , 5)  
15 Mental health (n = 13), 6) Pregnancy and birth (n = 11), 7) Dietary (n = 9), 8) Skin and allergies  
16 (n = 9), 9) Occupational health and injuries (n = 6) and 10) Other health outcomes (n = 17) (e.g.,  
17 sleep, arthritis, disability-adjusted life years, non-occupational injuries, etc.)  
18  
19  
20

21 Figure 4 depicts the combinations of climate impact and health outcome for each study, with  
22 Appendix 5 offering further details. The 5 most common combinations are studies investigating  
23 the 1) meteorological impacts on infectious diseases (n = 35), 2) mortality (n = 24) and 3)  
24 respiratory, cardiovascular, cardiopulmonary and neurological outcomes (n = 17), and 4)  
25 extreme weather events’ impacts on infectious diseases (n = 14) and 5) meteorological impacts  
26 on health systems (n = 11).  
27  
28  
29

### 30 **Insert Figure 4 About Here**

31  
32 For studies investigating meteorological impacts on health, the three most common health  
33 outcomes studied were impacts on 1) infectious diseases (n = 35), 2) mortality (n = 24) and 3)  
34 respiratory, cardiovascular, cardiopulmonary and neurological outcomes (n = 17). Extreme  
35 weather event studies most commonly reported health outcomes related to 1) infectious  
36 diseases (n = 14), 2) mental health outcomes (n = 9) and 3) dietary outcomes (n = 6) and other  
37 health outcomes (e.g., injuries, sleep) (n = 6). Studies focused on the impact of air quality were  
38 less frequent and explored mostly health outcomes linked to 1) respiratory, cardiovascular,  
39 cardiopulmonary and neurological outcomes (n = 6), 2) mortality (n = 5) and 3) pregnancy and  
40 birth outcomes (n = 3).  
41  
42  
43

44 Meteorological factors’ impact on all health outcomes are explored, although some health  
45 outcomes are more rarely explored (e.g., mental health and dietary outcomes). In contrast, the  
46 impact of extreme weather events and air quality on skin and allergies and occupational health  
47 are not explored and their impacts on respiratory, cardiovascular, cardiopulmonary and  
48 neurological outcomes, health systems and pregnancy outcomes are only rarely explored. The  
49 impacts of air quality on infectious diseases, dietary outcomes, skin and allergies, and  
50 occupational health and injuries are also not explored. Most health outcomes are most  
51 frequently explored according to the meteorological impacts, however, mental health outcomes  
52 and dietary outcomes are most frequently explored according to extreme weather events.  
53  
54  
55  
56  
57  
58  
59  
60

## Summary of Findings

Most reviews suggest a deleterious impact of climate change on multiple adverse health outcomes, with some associations being explored and/or supported with consistent findings more often than others (see Table 2 for a summary of findings according to health outcomes). For instance, the association between meteorological factors, such as temperature and humidity, and vector-borne diseases is quite substantially supported by multiple reviews (n = 22) conducted in multiple geographic locations. In contrast, the association between wildfire smoke exposure and adverse birth outcomes is plausible, but the evidence from included reviews is still in its infancy stage because only a few reviews (n = 3) investigated this association and the findings are currently conflicting.

Most reviews concluded by calling for more research, noting the limitations observed among the studies included in their reviews, as well as limitations in their reviews themselves. These limitations included, amongst others, some systematic reviews having a small number of publications,<sup>27,28</sup> language restrictions such as including only papers in English,<sup>20,23</sup> arriving at conflicting evidence,<sup>29</sup> difficulty concluding a strong association due to the heterogeneity in methods and measurements or the limited equipment and access to quality data in certain contexts,<sup>27,30–32</sup> and most studies included were conducted in high-income countries.<sup>33,34</sup>

Previous authors also discussed the important challenge related to exploring the relationship between climate change and health. Not only is it difficult to explore the potential causal relationship between climate change and health, mostly due to methodological challenges, but there are also a wide variety of complex causal factors that may interact to determine health outcomes. Therefore, the possible causal mechanisms underlying these associations were at times still unknown or uncertain and the impacts of some climate factors were different according to geographical location and specificities of the context. Nonetheless, some reviews offered potential explanations for the climate-health association, with the climate factor at times, having a direct impact on health (e.g., flooding causing injuries) and in other cases, having an indirect impact (e.g., flooding causing stress which in turn may cause adverse birth outcomes.)

**Table 2.** Summary of findings from systematic reviews according to health outcome and climate impact. Reviews that covered multiple climate impacts are listed in each relevant category.

| Climate Impact | F | Summary of Findings                              |
|----------------|---|--------------------------------------------------|
|                |   | <b>Infectious diseases (n = 41)</b>              |
|                |   | <i>Vector borne infectious diseases (n = 25)</i> |

|                                                          |    |                                                                                                                                                                                                                                                                                                                                                                                                                                                                                                                                                                                                                                                                                                                                                                                                                                                                                                                                                                                   |
|----------------------------------------------------------|----|-----------------------------------------------------------------------------------------------------------------------------------------------------------------------------------------------------------------------------------------------------------------------------------------------------------------------------------------------------------------------------------------------------------------------------------------------------------------------------------------------------------------------------------------------------------------------------------------------------------------------------------------------------------------------------------------------------------------------------------------------------------------------------------------------------------------------------------------------------------------------------------------------------------------------------------------------------------------------------------|
| Meteorological                                           | 22 | Systematic reviews suggest that meteorological factors, such as temperature, precipitation, humidity, and wind, are associated with diverse vector-borne infectious diseases, including malaria and dengue. <sup>6,9,20,21,30,32,35-50</sup> This association was mostly proportional (e.g., higher temperature and increased rainfall associated with vector-borne diseases), although findings were at times conflicting, with some suggesting an inversely proportional association <sup>9</sup> (e.g., decreased rainfall) or no association at all <sup>40</sup> (e.g., with the human puumala hantavirus Infection.) Geographic location, seasonality and potential interaction with other climate-related factors may partly explain these inconsistencies. <sup>9,30</sup> Temperature, humidity and rainfall were the most common and important meteorological factors reported by reviews and factors such as wind, air pressure and sunshine were reported less often. |
| Extreme weather                                          | 7  | There are limited and conflicting findings concerning the association of extreme weather events with vector-borne diseases. Some reviews suggest water-related extreme events <sup>51</sup> and flooding <sup>3,32,52</sup> are associated with an increased risk of vector-borne diseases, while drought is associated with a reduction of dengue incidence. <sup>9</sup> Other reviews focused specifically on Puerto Rico <sup>43</sup> and Australia <sup>53</sup> did not find an association between hurricanes and/or floods and mosquito-borne disease transmission.                                                                                                                                                                                                                                                                                                                                                                                                      |
| <i>Food and water borne infectious diseases (n = 19)</i> |    |                                                                                                                                                                                                                                                                                                                                                                                                                                                                                                                                                                                                                                                                                                                                                                                                                                                                                                                                                                                   |
| Meteorological                                           | 14 | Reviews suggest that meteorological factors, such as temperature, precipitation, and humidity, are associated with diverse food- and water-borne infectious diseases, in particular, cholera, food poisoning, schistosomiasis, salmonella and E. coli. <sup>8,21,32,41,45,48,54-61</sup> Overall, higher temperatures and humidity, <sup>8,41,54,58</sup> along with lower precipitation <sup>21,61</sup> was associated with these infectious diseases (e.g., E. coli <sup>58</sup> ; bacterial gastrointestinal infections. <sup>54</sup> ) Directionality and strength of the association seemed to vary according to disease and pathogens, <sup>59</sup> seasons, and geographic region. <sup>56</sup>                                                                                                                                                                                                                                                                       |
| Extreme weather                                          | 10 | Reviews suggest a proportional association between extreme water-related events, <sup>47,51,62</sup> such as flooding <sup>3,41,52</sup> and heavy rainfall <sup>35</sup> , and food- and water-borne diseases, including diarrhea, food contamination, cholera. <sup>3,32,35,41,45,47,51,52,57,62</sup> Drought may also be proportionally associated with food- and water-borne disease, <sup>24,35</sup> but these associations are less consistent than those with water-related extreme events. <sup>57</sup>                                                                                                                                                                                                                                                                                                                                                                                                                                                                |
| <i>Other infectious diseases (n = 8)</i>                 |    |                                                                                                                                                                                                                                                                                                                                                                                                                                                                                                                                                                                                                                                                                                                                                                                                                                                                                                                                                                                   |

|                                                                               |    |                                                                                                                                                                                                                                                                                                                                                                                                                                                                                                                                                                                                                                                                                                                                                                                                                                                                                                                                                                                                                                                                                                                                                                                                                            |
|-------------------------------------------------------------------------------|----|----------------------------------------------------------------------------------------------------------------------------------------------------------------------------------------------------------------------------------------------------------------------------------------------------------------------------------------------------------------------------------------------------------------------------------------------------------------------------------------------------------------------------------------------------------------------------------------------------------------------------------------------------------------------------------------------------------------------------------------------------------------------------------------------------------------------------------------------------------------------------------------------------------------------------------------------------------------------------------------------------------------------------------------------------------------------------------------------------------------------------------------------------------------------------------------------------------------------------|
| Meteorological                                                                | 8  | Reviews suggest an association of most meteorological factors, such as temperature and humidity, with various other infectious diseases, including meningitis, <sup>27,35</sup> Ebola, <sup>27</sup> influenza, <sup>32</sup> and pediatric infectious diseases such as hand-foot-and-mouth disease. <sup>4,5,31,49,55</sup> This association was mostly proportional for meteorological factors such as temperature, <sup>4,5,49</sup> diurnal temperature range, <sup>31</sup> and humidity, <sup>4,5,32</sup> although some meteorological factors, such as air pressure <sup>5</sup> and lower temperatures <sup>32,49</sup> were inversely proportional to these diseases. Some conflicting evidence is reported concerning the association with some meteorological factors, such as sunshine with hand-foot-and-mouth disease, <sup>4,5</sup> and humidity and pediatric infectious diseases. <sup>55</sup> No association was found between some meteorological factors, such as precipitation, wind speed and sunshine with hand-foot-and-mouth disease. <sup>4,5</sup>                                                                                                                                           |
| <b>Mortality (n = 32)</b>                                                     |    |                                                                                                                                                                                                                                                                                                                                                                                                                                                                                                                                                                                                                                                                                                                                                                                                                                                                                                                                                                                                                                                                                                                                                                                                                            |
| Meteorological                                                                | 24 | Reviews suggest that temperature (high, low, or diurnal range) was consistently associated with all-cause and cause-specific mortality. <sup>20,21,27,28,31,34,45,47,49,63–76</sup> A strong association was reported between heat (including heat waves) and mortality (all-cause), <sup>63</sup> heat-, <sup>21,68</sup> stroke-, <sup>27,69</sup> cardiovascular-, <sup>34,47</sup> and respiratory-related, <sup>20,34,70</sup> especially in rural, <sup>67</sup> very young children <sup>49</sup> and ageing populations. <sup>28</sup> Mortality seems to be the most frequent health outcome studied in association with heatwaves. <sup>64</sup> Inconsistent results are found concerning the association between heat and childhood mortality. <sup>74</sup> Due to limited evidence, this association was weaker in some geographical regions. <sup>27,71</sup> Also, heat wave intensity (compared to duration) was more strongly associated with heat-related mortality. <sup>75</sup> Finally, although less studied, low temperature was also associated with mortality, <sup>49,76</sup> specifically respiratory, <sup>63</sup> stroke, <sup>69</sup> and cardiovascular mortality. <sup>47,66,70</sup> |
| Extreme Weather                                                               | 5  | Reviews suggest an association between extreme weather events such as floods, <sup>3</sup> droughts, <sup>24</sup> cyclones <sup>77</sup> and other water-related events, <sup>20,51</sup> with direct (e.g., drowning) and indirect long-term mortality (e.g., due to malnutrition, environmental toxin exposure, armed conflict, etc.). <sup>3,24,51,77</sup>                                                                                                                                                                                                                                                                                                                                                                                                                                                                                                                                                                                                                                                                                                                                                                                                                                                            |
| Air quality                                                                   | 5  | Reviews suggest an association between exposure to air pollution <sup>20,78</sup> or wildfire smoke <sup>79–81</sup> and air pollution related-mortality, such as respiratory-specific mortality. There is currently limited evidence, but reviews suggest a potential association between wildfire smoke exposure and cardiovascular-specific mortality. <sup>79–81</sup>                                                                                                                                                                                                                                                                                                                                                                                                                                                                                                                                                                                                                                                                                                                                                                                                                                                 |
| <b>Respiratory, neurological, cardiovascular and cardiopulmonary (n = 22)</b> |    |                                                                                                                                                                                                                                                                                                                                                                                                                                                                                                                                                                                                                                                                                                                                                                                                                                                                                                                                                                                                                                                                                                                                                                                                                            |

|                                |    |                                                                                                                                                                                                                                                                                                                                                                                                                                                                                                                                                                                                                                                                                                                                                                                                                                                                                                                                                                                                                                                                                                                                                            |
|--------------------------------|----|------------------------------------------------------------------------------------------------------------------------------------------------------------------------------------------------------------------------------------------------------------------------------------------------------------------------------------------------------------------------------------------------------------------------------------------------------------------------------------------------------------------------------------------------------------------------------------------------------------------------------------------------------------------------------------------------------------------------------------------------------------------------------------------------------------------------------------------------------------------------------------------------------------------------------------------------------------------------------------------------------------------------------------------------------------------------------------------------------------------------------------------------------------|
| Meteorological                 | 17 | Reviews suggest an association between meteorological factors, such as temperature and humidity, and cardiopulmonary, cardiovascular, respiratory and neurological outcomes. <sup>20,26,27,31,34,37,45,49,55,63,66,68,69,73,74,82,83</sup> Exposure to high temperatures and extreme heat are associated to cardiovascular and respiratory diseases, <sup>20,27,37,49,66</sup> stroke, <sup>69</sup> long-term neurological outcomes (due to heat strokes), <sup>68</sup> myocardial infarction, <sup>34,83</sup> and childhood asthma and pediatric respiratory diseases. <sup>26,74</sup> A review also suggests a beneficial association between heat and the shortening of a respiratory virus season. <sup>45</sup> Exposure to low temperature (cold), temperature drop, or diurnal temperature range was associated with cardiovascular and respiratory diseases, <sup>31,63,66</sup> stroke, <sup>69</sup> and myocardial infarctions. <sup>34</sup> Humidity (most often high humidity, but also lower humidity) and low temperatures were also associated with respiratory diseases in children, including childhood asthma. <sup>26,55,82</sup> |
| Extreme Weather                | 1  | A previous review suggests an association between drought and respiratory, cardiovascular and cardiopulmonary outcomes, most likely due to droughts leading to increased dust in the air. <sup>24</sup>                                                                                                                                                                                                                                                                                                                                                                                                                                                                                                                                                                                                                                                                                                                                                                                                                                                                                                                                                    |
| Air quality                    | 6  | Reviews suggest a proportional association between exposure to air pollution <sup>20,21,45</sup> or wildfire smoke exposure <sup>79-81</sup> and respiratory outcomes, including asthma, chronic obstructive pulmonary disease, coughing, wheezing, and overall lung function. Although there is currently limited evidence, <sup>79</sup> reviews also suggest a potential association between air pollution or wildfire smoke exposure and cardiovascular outcomes. <sup>45,80,81</sup>                                                                                                                                                                                                                                                                                                                                                                                                                                                                                                                                                                                                                                                                  |
| <b>Health systems (n = 16)</b> |    |                                                                                                                                                                                                                                                                                                                                                                                                                                                                                                                                                                                                                                                                                                                                                                                                                                                                                                                                                                                                                                                                                                                                                            |
| General                        | 1  | A previous review suggests that climate change in general puts a strain on public health resources, via population health issues and shows that using an integrated surveillance system may guide future adaptation to climate change. <sup>84</sup>                                                                                                                                                                                                                                                                                                                                                                                                                                                                                                                                                                                                                                                                                                                                                                                                                                                                                                       |
| Meteorological                 | 11 | Previous reviews suggest an association between temperature change <sup>31</sup> extreme heat, aridity and cold temperatures and an increase in use of healthcare services (mostly linked to heat-related health impacts), such as an increase in emergency department visits, hospital admissions and use of ambulances. <sup>20,21,27,31,34,49,64,71,74,83,85</sup>                                                                                                                                                                                                                                                                                                                                                                                                                                                                                                                                                                                                                                                                                                                                                                                      |
| Extreme weather                | 2  | Reviews suggest that extreme weather events <sup>33</sup> and flooding <sup>3</sup> are associated with an increase in use of healthcare services (e.g., increased hospitalizations) and a compromised quality of care as extreme weather events may lead to power outages. <sup>33</sup>                                                                                                                                                                                                                                                                                                                                                                                                                                                                                                                                                                                                                                                                                                                                                                                                                                                                  |
| Air quality                    | 2  | Reviews suggest an association between wildfire smoke exposure and an increase in use of healthcare services, such as an increase in emergency department visits. <sup>79,81</sup>                                                                                                                                                                                                                                                                                                                                                                                                                                                                                                                                                                                                                                                                                                                                                                                                                                                                                                                                                                         |
| <b>Mental health (n = 13)</b>  |    |                                                                                                                                                                                                                                                                                                                                                                                                                                                                                                                                                                                                                                                                                                                                                                                                                                                                                                                                                                                                                                                                                                                                                            |



|                                              |   |                                                                                                                                                                                                                                                                                                                                                                                                                                                                                                                                                    |
|----------------------------------------------|---|----------------------------------------------------------------------------------------------------------------------------------------------------------------------------------------------------------------------------------------------------------------------------------------------------------------------------------------------------------------------------------------------------------------------------------------------------------------------------------------------------------------------------------------------------|
| Meteorological                               | 3 | Reviews suggest an association of most meteorological factors such as temperature increase, aridity, heat, and heat waves with mental health outcomes, including hospital admissions for mental health reasons, <sup>21</sup> suicide, <sup>86</sup> and exacerbation of pre-existing mental health conditions, difficulty sleeping, and fatigue. <sup>83</sup> No association was found between sunlight duration and suicide incidence. <sup>86</sup>                                                                                            |
| Extreme weather                              | 9 | Most reviews reported a proportional association of extreme weather events, <sup>45,51,87,88</sup> flooding, <sup>3,20,89</sup> and drought <sup>24,25</sup> with diverse mental health issues, including, psychological distress, post-traumatic stress disorder, anxiety, depression, psychotropic medication use, alcohol consumption. There was conflicting evidence regarding the association of floods with suicide, tobacco, alcohol and substance abuse. <sup>89</sup> No association was found between drought and suicide. <sup>24</sup> |
| Air quality                                  | 1 | A previous review suggests no association between wildfire smoke exposure and mental health, as measured by physician visits and hospitalizations for mental health reasons during wildfires. <sup>80</sup>                                                                                                                                                                                                                                                                                                                                        |
| <b>Pregnancy and birth outcomes (n = 11)</b> |   |                                                                                                                                                                                                                                                                                                                                                                                                                                                                                                                                                    |
| Meteorological                               | 5 | Reviews suggest that adverse birth outcomes are higher among people exposed to meteorological factors such as high temperature, heat, sunlight intensity, cold and humidity. <sup>21,90–93</sup> These outcomes include low birth weight, preterm birth, eclampsia and preeclampsia, hypertension and length of pregnancy. <sup>21,90–93</sup> The association between heat and adverse birth outcomes seems to have stronger support than the association with cold temperatures. <sup>93</sup>                                                   |
| Extreme Weather                              | 2 | Reviews suggest an association of extreme weather events <sup>87</sup> and flooding <sup>3</sup> with adverse birth outcomes, such as low birth weight, preterm birth and pre-eclampsia. It is suggested that extreme weather events may indirectly affect birth outcomes via the pregnant person's well-being (e.g., stress and worry during pregnancy.) <sup>3,87</sup>                                                                                                                                                                          |
| Air quality                                  | 3 | There is limited and inconsistent evidence concerning the association between wildfire smoke exposure and adverse birth outcomes, but reviews suggest a potential proportional association between wildfire smoke exposure and lower birth weight. <sup>79–81</sup>                                                                                                                                                                                                                                                                                |
| Other                                        | 1 | The association between environmental pollutants and adverse birth outcomes (i.e., preterm birth) remains unclear due to conflicting evidence. <sup>29</sup>                                                                                                                                                                                                                                                                                                                                                                                       |
| <b>Dietary (n = 9)</b>                       |   |                                                                                                                                                                                                                                                                                                                                                                                                                                                                                                                                                    |
| General                                      | 1 | A review suggests an association between climate change and obesity. <sup>22</sup>                                                                                                                                                                                                                                                                                                                                                                                                                                                                 |
| Meteorological                               | 4 | Reviews suggest an association between meteorological factors, such as changes in temperature, heat and precipitation, with diverse dietary outcomes, including undernutrition, malnutrition and child stunting. <sup>21,23,27,71</sup> This association may be                                                                                                                                                                                                                                                                                    |

|                                                 |   |                                                                                                                                                                                                                                                                                                                                                                                                                                                                                                                                                                                                                                                           |
|-------------------------------------------------|---|-----------------------------------------------------------------------------------------------------------------------------------------------------------------------------------------------------------------------------------------------------------------------------------------------------------------------------------------------------------------------------------------------------------------------------------------------------------------------------------------------------------------------------------------------------------------------------------------------------------------------------------------------------------|
|                                                 |   | explained by the impact of meteorological factors, such as temperature increase and precipitation decrease, on crop production and food insecurity. <sup>21,71</sup>                                                                                                                                                                                                                                                                                                                                                                                                                                                                                      |
| Extreme Weather                                 | 6 | Reviews suggest an association between extreme weather events, such as flooding and droughts, <sup>24</sup> and diverse dietary outcomes, including malnutrition and undernutrition in children and adults <sup>21,23,35,45,47</sup> via, amongst others, crops production and food insecurity (e.g., low food aid following flooding <sup>21</sup> ).                                                                                                                                                                                                                                                                                                    |
| Other                                           | 1 | A review suggests an association between certain environmental risk factors (e.g., sanitation, cooking fuels and food-borne mycotoxins), and childhood stunting, which could be aggravated by climate change. <sup>94</sup>                                                                                                                                                                                                                                                                                                                                                                                                                               |
| <b>Skin and allergies (n = 9)</b>               |   |                                                                                                                                                                                                                                                                                                                                                                                                                                                                                                                                                                                                                                                           |
| General                                         | 2 | Reviews suggest a proportional association between climate change, in general, and skin and soft tissue infections (e.g., fatal vibrio vulnificus necrotizing) <sup>95</sup> and ragweed pollen allergies in Europe. <sup>96</sup>                                                                                                                                                                                                                                                                                                                                                                                                                        |
| Meteorological                                  | 7 | Reviews suggest an association of meteorological factors, such as ultraviolet light exposure, temperature and humidity, with diverse skin and allergic diseases, including skin cancer, sunburn, acute urticaria, eczema and pediatric allergies and skin irritabilities. <sup>27,45,47,49,55,83,97</sup> Higher temperature and ultraviolet light exposure is proportionally associated with sunburn <sup>83</sup> and skin cancer, <sup>45,97</sup> while low humidity and low temperatures were associated with eczema and skin irritabilities in children. <sup>49,55</sup>                                                                           |
| <b>Occupational health and injuries (n = 6)</b> |   |                                                                                                                                                                                                                                                                                                                                                                                                                                                                                                                                                                                                                                                           |
| Meteorological                                  | 6 | Reviews suggest that heat is associated with adverse occupational health outcomes, including injuries, heat strain, dehydration and kidney diseases. <sup>98–103</sup> The most frequent injuries consist of 'slips, trips, falls, wounds, lacerations and amputations.' <sup>99</sup> This association was found in many occupational settings, including agriculture, construction, transport and fishing, and seems to affect both outdoor and indoor workers. <sup>98</sup> This association may be explained by a combination of direct (e.g., dehydration) and indirect factors (e.g., impaired cognitive and physical performance.) <sup>102</sup> |
| Other                                           | 1 | A review suggests an association between environmental pollution (e.g., heavy metals, fertilizers, etc.) and occupational diseases, such as chronic kidney disease. <sup>103</sup> This association is suggested to be affected by increasing temperatures.                                                                                                                                                                                                                                                                                                                                                                                               |
| <b>Other (n = 17)</b>                           |   |                                                                                                                                                                                                                                                                                                                                                                                                                                                                                                                                                                                                                                                           |

|                 |    |                                                                                                                                                                                                                                                                                                                                                                                                                                                                                                                                                                                                                                                    |
|-----------------|----|----------------------------------------------------------------------------------------------------------------------------------------------------------------------------------------------------------------------------------------------------------------------------------------------------------------------------------------------------------------------------------------------------------------------------------------------------------------------------------------------------------------------------------------------------------------------------------------------------------------------------------------------------|
| General         | 1  | A review suggests an association between climate change in general and disability-adjusted life years, which is an indicator that quantifies 'the burden of disease attributable to climate change'. <sup>104</sup> Authors suggest that the cost of disability-adjusted life years could be high, especially in low to middle income countries.                                                                                                                                                                                                                                                                                                   |
| Meteorological  | 10 | Reviews suggests an association between increasing temperatures and temperature changes, <sup>31</sup> and other various health outcomes, including acute gouty arthritis, <sup>105</sup> unintentional injuries, <sup>106</sup> diabetes, <sup>63</sup> genitourinary diseases, <sup>31,63</sup> impaired sleep time and quality, <sup>107</sup> cataracts (indirectly associated via people spending more time outside and therefore increased exposure to ultraviolet light), <sup>45,47</sup> heat stress, heat exhaustion and kidney failure, <sup>83</sup> and renal diseases, fever and electrolyte imbalance in children. <sup>49,74</sup> |
| Extreme weather | 6  | Reviews suggests an association between extreme weather events, <sup>88</sup> such as flooding, <sup>3</sup> cyclones, <sup>77</sup> hurricanes, <sup>107</sup> and drought, <sup>24</sup> and other various health outcomes including injuries (e.g., debris, diving in water that is shallower than expected), <sup>3,24,77,88</sup> impaired sleep, <sup>107</sup> esophageal cancer (likely linked to high salinity of water due to droughts), <sup>24</sup> and exacerbation of chronic illnesses. <sup>3,87</sup>                                                                                                                            |
| Air quality     | 1  | There is limited evidence, but a systematic review suggests an association between wildfire smoke exposure and ophthalmic outcomes, such as eye irritation and cataracts. <sup>79</sup>                                                                                                                                                                                                                                                                                                                                                                                                                                                            |

## Discussion

### Principal results

In this overview of systematic reviews, we aimed to develop an overview of systematic reviews of health impacts of climate change by mapping the characteristics and findings of studies exploring the relationship between climate change and health. We identified four key findings.

First, the most common climate impact studied by included publications consists of meteorological impacts (e.g., temperature, heat, precipitation and humidity), which aligns with findings from a previous scoping review on the health impacts of climate change in the Philippines.<sup>7</sup> Although this may not be surprising given that a key implication of climate change is the rise in temperature, this finding suggests we also need to undertake research focused on other climate impacts on health, such as the impact of droughts and wildfire smoke, to better prepare for the health crises that arise from these multiple climate-related impacts.

Second, systematic reviews primarily focus on physical health outcomes, such as infectious diseases, mortality, and respiratory, cardiopulmonary, cardiovascular and neurological outcomes, which also aligns with the country-specific previous scoping review.<sup>7</sup> Regarding mortality, we support Campbell and colleagues'<sup>64</sup> suggestion that we should expand our focus

1  
2  
3 to include other types of health outcomes. This will allow us to better mitigate and adapt to the  
4 full range of threats of climate change.  
5

6  
7 It is unclear whether the distribution of frequencies of health outcomes reflects the actual burden  
8 of health impacts of climate change, or if the most frequently reported outcomes reflect a bias of  
9 Western definitions of health. The most commonly-studied health outcomes do not necessarily  
10 reflect the definition of health presented by the WHO as, "a state of complete physical, mental  
11 and social well-being and not merely the absence of disease or infirmity."<sup>17</sup> This suggests that  
12 future studies should investigate in greater depth the impacts of climate change on mental and  
13 broader social well-being. Indeed, some reviews suggested that climate change impacts  
14 psychological and social well-being, via broader consequences, such as political instability,  
15 health system capacity, migration, and crime,<sup>83,87</sup> thus illustrating how our personal health is  
16 determined not only by biological and environmental factors but also by social and health  
17 systems.  
18  
19

20  
21 Interestingly, the reviews that explored the mental health impacts of climate change were  
22 focused mostly on the direct impacts of experiencing extreme weather events. However,  
23 psychologists are also warning about indirect mental health impacts of climate change, which  
24 are becoming more prevalent for children and adults alike.<sup>108,109</sup> Even people who do not  
25 experience direct climate impacts, such as extreme weather events, report experiencing  
26 disruptive negative emotions when thinking of the destruction of our environment or when  
27 worrying about one's uncertain future and the lack of actions being taken. To foster emotional  
28 resilience in the face of climate change, these mental health impacts of climate change need to  
29 be further explored. Humanity's ability to adapt to and mitigate climate change ultimately  
30 depends on our emotional capacity to face this threat.  
31  
32  
33

34  
35 Third, there is a notable geographic difference in the country affiliations of first authors, with  
36 three quarters of systematic reviews having been led by first authors affiliated to institutions in  
37 Europe, Australia, or North America. While perhaps unsurprising given the inequalities in  
38 research funding and institutions concentrated in Western countries, this is of critical importance  
39 given the significant health impacts that will be faced in other parts of the world. Research  
40 funding organizations should seek to provide more resources to authors in low- to middle-  
41 income countries to ensure their expertise and perspectives are better represented in the  
42 literature.  
43  
44

45  
46 Fourth, overall, most reviews suggest an association between climate change and the  
47 deterioration of health in various ways, thus illustrating the interdependence of our health and  
48 well-being with the well-being of our environment. At times, climate change and its related  
49 environmental events may impact health directly (e.g., heat's impact on dehydration and  
50 exhaustion) and other times, it may impact it indirectly (e.g., via behaviour change due to heat.)  
51 The climate-health link has been the target of more research in recent years and it is also  
52 receiving increasing attention in both public health and climate communication literature.<sup>110,111</sup>  
53 The health framing of climate communication also has implications for healthcare  
54 professionals<sup>112</sup> and policymakers, as these actors could play a key part in climate  
55  
56  
57  
58  
59

1  
2  
3 communication, adaptation, and mitigation. These key stakeholders' perspectives on the  
4 climate-health link, as well as their perceived role in climate adaptation and mitigation could be  
5 explored,<sup>113</sup> since research suggests that health professionals are important voices in climate  
6 communications<sup>112</sup> and especially since, ultimately, these adverse health outcomes will  
7 engender pressure on and cost to our health systems and health workers.  
8  
9

## 10 Strengths and Limitations

11  
12 To the best of our knowledge, the current study provides the first broad overview of previous  
13 systematic reviews exploring the health impacts of climate change. Our review has three main  
14 strengths. First, by targeting systematic reviews, we achieve a higher-order summary of findings  
15 than what would have been possible by consulting individual original studies. Second, by  
16 synthesizing findings across all included studies and according to the combination of climate  
17 impact and health outcome, we offer a clear, detailed, and unique summary of the current state  
18 of evidence and knowledge gaps about how climate change may influence human health. This  
19 summary may be of use to researchers, policymakers, and communities. Third, we included  
20 studies published in all languages about any climate impact and any health outcome. In doing  
21 so, we provide a comprehensive and robust overview.  
22  
23  
24

25  
26 Our work has three main limitations. First, we were unable to access some full texts and  
27 therefore some studies were excluded, even though we deemed them potentially relevant after  
28 title and abstract inspection. Other potentially relevant systematic reviews may be missing due  
29 to unseen flaws in our systematic search. Second, due to the heterogeneity of the included  
30 systematic reviews and the relatively small proportion of studies reporting meta-analytic  
31 findings, we could not conduct meta-meta-analyses of findings across reviews. Future research  
32 is needed to quantify the climate and health links described in this review, as well as to  
33 investigate the causal relationship and other interacting factors. Third, due to limited resources,  
34 we did not assess overlap between the included reviews concerning the studies they included.  
35 Frequencies and findings should be interpreted with potential overlap in mind.  
36  
37  
38

## 39 Conclusions

40  
41 Overall, systematic reviews of the health impacts of climate change suggest an association  
42 between climate change and the deterioration of health in multiple ways, generally in the  
43 direction that climate change is associated with adverse human health outcomes. This is  
44 worrisome since these outcomes are predicted to rise in the near future, due to the temperature  
45 rise and increase in climate-change-related events such as extreme weather events and  
46 worsened air quality. Most studies included in this review focused on meteorological impacts of  
47 climate change on adverse physical health outcomes. Future studies could fill knowledge gaps  
48 by exploring other climate-related impacts and broader psychosocial health outcomes.  
49 Moreover, studies on health impacts of climate change have mostly been conducted by first  
50 authors affiliated with institutions in high-income countries. This inequity needs to be addressed,  
51 considering that the impacts of climate change are and will continue to predominantly impact  
52 lower-income countries. Finally, although most reviews also recommend more research to  
53  
54  
55  
56  
57  
58  
59  
60

1  
2  
3 better understand and quantify these associations, to adapt to and mitigate climate change's  
4 impacts on health, it will also be important to unpack the 'what, how, and where' of these  
5 effects. Health effects of climate change are unlikely to be distributed equally or randomly  
6 through populations. It will be important to mitigate the changing climate's potential to  
7 exacerbate health inequities.  
8  
9  
10  
11  
12  
13  
14  
15  
16  
17  
18  
19  
20  
21  
22  
23  
24  
25  
26  
27  
28  
29  
30  
31  
32  
33  
34  
35  
36  
37  
38  
39  
40  
41  
42  
43  
44  
45  
46  
47  
48  
49  
50  
51  
52  
53  
54  
55  
56  
57  
58  
59  
60

For peer review only

## Acknowledgements

The authors gratefully acknowledge the contributions of Selma Chipenda Dansokho, as research associate, and Thierry Provencher, as research assistant, to this project, and of Frederic Bergeron, for assistance with search strategy, screening and selection of articles for the systematic review.

## Funding

This study was funded by the Canadian Institutes of Health Research (CIHR) FDN-148426. The CIHR had no role in determining the study design, the plans for data collection or analysis, the decision to publish, nor the preparation of this manuscript. ACT is funded by a Tier 2 Canada Research Chair in Knowledge Synthesis. HOW is funded by a Tier 2 Canada Research Chair in Human-Centred Digital Health.

## Ethics Committee Approval

Since this is a systematic review of previous systematic reviews, no ethics approval was required, as we did not collect original data.

## Authors' Contributions

RN, CF, ACT, HOW contributed to the design of the study. CB, RN, LPB, RAPR and HOW contributed to the systematic search of the literature and selection of studies. RR, HOW, LC conducted data analysis and interpretation. RR and HOW drafted the first version of the article with early revision by CB, LC and RN. All authors critically revised the article and approved the final version for submission for publication. RR and HOW had full access to all the data in the study and had final responsibility for the decision to submit for publication.

## Conflict of Interest Statement

The authors have no conflict of interest to declare.

## Data Sharing Statement

No additional data available.

## References

- 1 Portier C, Tart K, Carter S, et al. A Human Health Perspective On Climate Change A Report Outlining the Research Needs on the Human Health Effects of Climate Change. Environmental Health Perspectives and the National Institute of Environmental Health Sciences, 2010.
- 2 Watts N, Amann M, Arnell N, et al. The 2019 report of The Lancet Countdown on health and climate change: ensuring that the health of a child born today is not defined by a changing climate. *Lancet* 2019; **394**: 1836–78.
- 3 Alderman K, Turner LR, Tong SL. Floods and human health: A systematic review. *Environ Int* 2012; **47**: 37–47.
- 4 Coates SJ, Davis MDP, Andersen LK. Temperature and humidity affect the incidence of hand, foot, and mouth disease: a systematic review of the literature - a report from the International Society of Dermatology Climate Change Committee. *Int J Dermatol* 2019; **58**: 388–99.
- 5 Duan C, Zhang X, Jin H, et al. Meteorological factors and its association with hand, foot and mouth disease in Southeast and East Asia areas: a meta-analysis. *Epidemiology & Infection* 2018; **147**: 1–18.
- 6 Babaie J, Barati M, Azizi M, Ephtekhari A, Sadat SJ. A systematic evidence review of the effect of climate change on malaria in Iran. *J Parasit Dis* 2018; **42**: 331–40.
- 7 Chua PL, Dorotan MM, Sigua JA, Estanislao RD, Hashizume M, Salazar MA. Scoping Review of Climate Change and Health Research in the Philippines: A Complementary Tool in Research Agenda-Setting. *Int J Environ Res Public Health* 2019; **16**. DOI:10.3390/ijerph16142624.
- 8 Lal A, Lill AW, McIntyre M, Hales S, Baker MG, French NP. Environmental change and enteric zoonoses in New Zealand: a systematic review of the evidence. *Aust N Z J Public Health* 2015; **39**: 63–8.
- 9 Li C, Lu Y, Liu J, Wu X. Climate change and dengue fever transmission in China: Evidences and challenges. *Sci Total Environ* 2018; **622-623**: 493–501.
- 10 Herlihy N, Bar-Hen A, Verner G, et al. Climate change and human health: what are the research trends? A scoping review protocol. *BMJ Open* 2016; **6**: e012022.
- 11 Hosking J, Campbell-Lendrum D. How well does climate change and human health research match the demands of policymakers? A scoping review. *Environ Health Perspect* 2012; **120**: 1076–82.
- 12 Pollock M, Fernandes RM, Becker LA, Pieper D, Hartling L. Chapter V: Overviews of Reviews. In: Higgins JPT, Thomas J, Chandler J, Cumpston M, Li T, Page MJ, Welch VA,



- ed. Cochrane Handbook for Systematic Reviews of Interventions version 6.1 (updated September 2020). Cochrane, 2020.
- 13 Witteman HO, Dansokho SC, Ndjaboue R, Provencher T, Poulin-Rheault RA, Poirier-Bergeron L, Beaudoin C, Fallon C, Rocque R, Tricco A. Climate change and human health: an overview of systematic reviews. 2019; published online Dec 4. [https://www.crd.york.ac.uk/PROSPERO/display\\_record.php?RecordID=145972](https://www.crd.york.ac.uk/PROSPERO/display_record.php?RecordID=145972) (accessed Aug 8, 2020).
  - 14 Page M, McKenzie J, Bossuyt P, Boutron I, Hoffmann TC, Mulrow C, Shamseer L, Chou R, Glanville J, Grimshaw JM, Hróbjartsson A, et al. Updating the PRISMA reporting guideline for systematic reviews and meta-analyses. 2020. DOI:10.17605/OSF.IO/P93GE.
  - 15 Pollock M, Fernandes RM, Pieper D, *et al.* Preferred Reporting Items for Overviews of Reviews (PRIOR): a protocol for development of a reporting guideline for overviews of reviews of healthcare interventions. *Syst Rev* 2019; **8**: 335.
  - 16 About Cochrane Reviews. <https://www.cochranelibrary.com/about/about-cochrane-reviews> (accessed Sept 14, 2020).
  - 17 World Health Organization. Preamble to the Constitution of WHO as adopted by the International Health Conference. New York, 19 June - 22 July 1946 signed on 22 July 1946 by the representatives of 61 States (Official Records of WHO, no. 2, p. 100) and entered into force on 7 April 1948. The definition has not been amended since 1948. [https://apps.who.int/gb/bd/pdf\\_files/BD\\_49th-en.pdf#page=7](https://apps.who.int/gb/bd/pdf_files/BD_49th-en.pdf#page=7).
  - 18 Covidence systematic review software. [www.covidence.org](http://www.covidence.org).
  - 19 Boylan S, Beyer K, Schlosberg D, *et al.* A conceptual framework for climate change, health and wellbeing in NSW, Australia. *Public Health Res Pract* 2018; **28**. DOI:10.17061/phrp2841826.
  - 20 Leyva EWA, Beaman A, Davidson PM. Health Impact of Climate Change in Older People: An Integrative Review and Implications for Nursing. *J Nurs Scholarsh* 2017; **49**: 670–8.
  - 21 Khader YS, Abdelrahman M, Abdo N, *et al.* Climate change and health in the Eastern Mediterranean countries: a systematic review. *Rev Environ Health* 2015; **30**: 163–81.
  - 22 An R, Ji M, Zhang S. Global warming and obesity: a systematic review. *Obes Rev* 2018; **19**: 150–63.
  - 23 Phalkey RK, Aranda-Jan C, Marx S, Hofle B, Sauerborn R. Systematic review of current efforts to quantify the impacts of climate change on undernutrition. *Proc Natl Acad Sci U S A* 2015; **112**: E4522–9.
  - 24 Stanke C, Kerac M, Prudhomme C, Medlock J, Murray V. Health Effects of Drought: A Systematic Review of the Evidence. *PLoS Curr* 2013. DOI:10.1371/currents.dis.7a2cee9e980f91ad7697b570bcc4b004.

- 1  
2  
3 25 Vins H, Bell J, Saha S, Hess JJ. The Mental Health Outcomes of Drought: A Systematic  
4 Review and Causal Process Diagram. *International Journal of Environmental Research &*  
5 *Public Health [Electronic Resource]* 2015; **12**: 13251–75.  
6  
7  
8 26 Xu Z, Crooks JL, Davies JM, Khan AF, Hu W, Tong S. The association between ambient  
9 temperature and childhood asthma: a systematic review. *Int J Biometeorol* 2018; **62**: 471–  
10 81.  
11  
12 27 Amegah AK, Rezza G, Jaakkola JJ. Temperature-related morbidity and mortality in Sub-  
13 Saharan Africa: A systematic review of the empirical evidence. *Environ Int* 2016; **91**: 133–  
14 49.  
15  
16 28 Odame EA, Li Y, Zheng SM, Vaidyanathan A, Silver K. Assessing Heat-Related Mortality  
17 Risks among Rural Populations: A Systematic Review and Meta-Analysis of  
18 Epidemiological Evidence. *Int J Environ Res Public Health* 2018; **15**.  
19 DOI:10.3390/ijerph15081597.  
20  
21  
22 29 Porpora MG, Piacenti I, Scaramuzzino S, Masciullo L, Rech F, Panici PB. Environmental  
23 contaminants exposure and preterm birth: A systematic review. *Toxics* 2019; **7**.  
24 DOI:10.3390/toxics7010011.  
25  
26  
27 30 Bai L, Morton LC, Liu Q. Climate change and mosquito-borne diseases in China: a review.  
28 *Globalization & Health* 2013; **9**: 10–10.  
29  
30 31 Cheng J, Xu Z, Zhu R, *et al*. Impact of diurnal temperature range on human health: a  
31 systematic review. *Int J Biometeorol* 2014; **58**: 2011–24.  
32  
33 32 Phung D, Huang C, Rutherford S, Chu C, Wang X, Nguyen M. Climate Change, Water  
34 Quality, and Water-Related Diseases in the Mekong Delta Basin: A Systematic Review.  
35 *Asia Pac J Public Health* 2015; **27**: 265–76.  
36  
37  
38 33 Klinger C, Landeg O, Murray V. Power Outages, Extreme Events and Health: A Systematic  
39 Review of the Literature from 2011-2012. *PLoS Curr* 2014.  
40 DOI:10.1371/currents.dis.04eb1dc5e73dd1377e05a10e9edde673.  
41  
42  
43 34 Sun Z, Chen C, Xu D, Li T. Effects of ambient temperature on myocardial infarction: A  
44 systematic review and meta-analysis. *Environ Pollut* 2018; **241**: 1106–14.  
45  
46 35 Berhane K, Kumie A, Samet J. Health Effects of Environmental Exposures, Occupational  
47 Hazards and Climate Change in Ethiopia: Synthesis of Situational Analysis, Needs  
48 Assessment and the Way Forward. *Ethiopian Journal of Health Development* 2016; **30**: 50–  
49 6.  
50  
51 36 Bernhardt V, Finkelmeier F, Verhoff MA, Amendt J. Myiasis in humans-a global case  
52 report evaluation and literature analysis. *Parasitol Res* 2019; **118**: 389–97.  
53  
54 37 de Sousa TCM, Amancio F, Hacon SS, Barcellos C. [Climate-sensitive diseases in Brazil  
55 and the world: systematic review] Enfermedades sensibles al clima en Brasil y el mundo:  
56  
57  
58  
59

- 1  
2  
3 revision sistematica. *Rev Panam Salud Publica* 2018; **42**: e85.  
4  
5  
6 38 Dhimal M, Ahrens B, Kuch U. Climate Change and Spatiotemporal Distributions of Vector-  
7 Borne Diseases in Nepal--A Systematic Synthesis of Literature. *PLoS ONE [Electronic*  
8 *Resource]* 2015; **10**: e0129869.  
9  
10 39 Fan J, Wei W, Bai Z, *et al.* A systematic review and meta-analysis of dengue risk with  
11 temperature change. *Int J Environ Res Public Health* 2015; **12**: 1–15.  
12  
13 40 Gracia JR, Schumann B, Seidler A. Climate Variability and the Occurrence of Human  
14 Puumala Hantavirus Infections in Europe: A Systematic Review. *Zoonoses Public Health*  
15 2015; **62**: 465–78.  
16  
17 41 Hedlund C, Blomstedt Y, Schumann B. Association of climatic factors with infectious  
18 diseases in the Arctic and subarctic region--a systematic review. *Glob Health Action* 2014;  
19 **7**: 24161.  
20  
21 42 Hii YL, Zaki RA, Aghamohammadi N, Rocklov J. Research on Climate and Dengue in  
22 Malaysia: A Systematic Review. *Current Environmental Health Reports* 2016; **3**: 81–90.  
23  
24 43 Matysiak A, Roess A. Interrelationship between Climatic, Ecologic, Social, and Cultural  
25 Determinants Affecting Dengue Emergence and Transmission in Puerto Rico and Their  
26 Implications for Zika Response. *J Trop Med* 2017; **2017**. DOI:10.1155/2017/8947067.  
27  
28 44 Naish S, Dale P, Mackenzie JS, McBride J, Mengersen K, Tong S. Climate change and  
29 dengue: a critical and systematic review of quantitative modelling approaches. *BMC Infect*  
30 *Dis* 2014; **14**: 167–167.  
31  
32 45 Nichols A, Maynard V, Goodman B, Richardson J. Health, climate change and  
33 sustainability: a systematic review and thematic analysis of the literature. *Environ Health*  
34 *Insights* 2009; : 63–88.  
35  
36 46 Racloz V, Ramsey R, Tong S, Hu W. Surveillance of dengue fever virus: a review of  
37 epidemiological models and early warning systems. *PLoS Neglected Tropical Diseases*  
38 *[electronic resource]* 2012; **6**: e1648.  
39  
40 47 Swynghedauw B. [Medical consequences of global warming]. *Presse Med* 2009; **38**: 551–  
41 61.  
42  
43 48 Waits A, Emelyanova A, Oksanen A, Abass K, Rautio A. Human infectious diseases and  
44 the changing climate in the Arctic. *Environ Int* 2018; **121**: 703–13.  
45  
46 49 Xu Z, Etzel RA, Su H, Huang C, Guo Y, Tong S. Impact of ambient temperature on  
47 children's health: a systematic review. *Environ Res* 2012; **117**: 120–31.  
48  
49 50 Yu W, Mengersen K, Dale P, *et al.* Projecting Future Transmission of Malaria Under  
50 Climate Change Scenarios: Challenges and Research Needs. *Crit Rev Environ Sci Technol*  
51 2015; **45**: 777–811.  
52  
53  
54  
55  
56  
57  
58  
59  
60

- 1  
2  
3 51 Veenema TG, Thornton CP, Lavin RP, Bender AK, Seal S, Corley A. Climate Change-  
4 Related Water Disasters' Impact on Population Health. *J Nurs Scholarsh* 2017; **49**: 625–34.  
5  
6  
7 52 Brown L, Murray V. Examining the relationship between infectious diseases and flooding  
8 in Europe: A systematic literature review and summary of possible public health  
9 interventions. *Disaster Health* 2013; **1**: 117–27.  
10  
11 53 Tall JA, Gatton ML, Tong S. Ross River Virus Disease Activity Associated With Naturally  
12 Occurring Nontidal Flood Events in Australia: A Systematic Review. *J Med Entomol* 2014;  
13 **51**: 1097–108.  
14  
15 54 Ghazani M, FitzGerald G, Hu WB, Toloo G, Xu ZW. Temperature Variability and  
16 Gastrointestinal Infections: A Review of Impacts and Future Perspectives. *Int J Environ Res*  
17 *Public Health* 2018; **15**. DOI:10.3390/ijerph15040766.  
18  
19 55 Gao J, Sun Y, Lu Y, Li L. Impact of ambient humidity on child health: a systematic review.  
20 *PLoS ONE [Electronic Resource]* 2014; **9**: e112508.  
21  
22  
23 56 Lal A, Fearnley E, Wilford E. Local weather, flooding history and childhood diarrhoea  
24 caused by the parasite *Cryptosporidium* spp.: A systematic review and meta-analysis. *Sci*  
25 *Total Environ* 2019; **674**: 300–6.  
26  
27 57 Levy K, Woster AP, Goldstein RS, Carlton EJ. Untangling the Impacts of Climate Change  
28 on Waterborne Diseases: a Systematic Review of Relationships between Diarrheal Diseases  
29 and Temperature, Rainfall, Flooding, and Drought. *Environ Sci Technol* 2016; **50**: 4905–22.  
30  
31 58 Philipsborn R, Ahmed SM, Brosi BJ, Levy K. Climatic Drivers of Diarrheagenic  
32 *Escherichia coli* Incidence: A Systematic Review and Meta-analysis. *J Infect Dis* 2016; **214**:  
33 6–15.  
34  
35 59 Semenza JC, Herbst S, Rechenburg A, *et al*. Climate change impact assessment of food-  
36 and waterborne diseases. *Crit Rev Environ Sci Technol* 2012; **42**: 857–90.  
37  
38 60 Stensgaard AS, Vounatsou P, Sengupta ME, Utzinger J. Schistosomes, snails and climate  
39 change: Current trends and future expectations. *Acta Trop* 2019; **190**: 257–68.  
40  
41 61 Welch K, Shipp-Hilts A, Eidson M, Saha S, Zansky S. Salmonella and the changing  
42 environment: systematic review using New York State as a model. *J Water Health* 2019;  
43 **17**: 179–95.  
44  
45 62 Cann KF, Thomas DR, Salmon RL, Wyn-Jones AP, Kay D. Extreme water-related weather  
46 events and waterborne disease. *Epidemiology & Infection* 2013; **141**: 671–86.  
47  
48 63 Bunker A, Wildenhain J, Vandenberg A, *et al*. Effects of Air Temperature on Climate-  
49 Sensitive Mortality and Morbidity Outcomes in the Elderly; a Systematic Review and Meta-  
50 analysis of Epidemiological Evidence. *EBioMedicine* 2016; **6**: 258–68.  
51  
52 64 Campbell S, Remenyi TA, White CJ, Johnston FH. Heatwave and health impact research: A  
53  
54  
55  
56  
57  
58  
59

- global review. *Health Place* 2018; **53**: 210–8.
- 65 Cunrui H, Barnett AG, Xiaoming W, Vaneckova P, FitzGerald G, Shilu T. Projecting Future Heat-Related Mortality under Climate Change Scenarios: A Systematic Review. *Environ Health Perspect* 2011; **119**: 1681–90.
- 66 Ghanizadeh G, Heidari M, Seifi B, Jafari H, Pakjouei S. The effect of climate change on cardiopulmonary disease—a systematic review. *J Clin Diagn Res* 2017; **11**: IE01–4.
- 67 Hajat S, Kosatky T. Heat-related mortality: a review and exploration of heterogeneity. *Journal of Epidemiology & Community Health* 2010; **64**: 753–60.
- 68 Lawton EM, Pearce H, Gabb GM. Review article: Environmental heatstroke and long-term clinical neurological outcomes: A literature review of case reports and case series 2000–2016. *Emerg Med Australas* 2019; **31**: 163–73.
- 69 Lian H, Ruan YP, Liang RJ, Liu XL, Fan ZJ. Short-Term Effect of Ambient Temperature and the Risk of Stroke: A Systematic Review and Meta-Analysis. *Int J Environ Res Public Health* 2015; **12**: 9068–88.
- 70 Moghadamnia MT, Ardalan A, Mesdaghinia A, Keshtkar A, Naddafi K, Yekaninejad MS. Ambient temperature and cardiovascular mortality: A systematic review and meta-analysis. *PeerJ* 2017; **2017**: 3574.
- 71 Salve HR, Parthasarathy R, Krishnan A, Pattanaik DR. Impact of ambient air temperature on human health in India. *Rev Environ Health* 2018; **33**: 433–9.
- 72 Sanderson M, Arbutnott K, Kovats S, Hajat S, Falloon P. The use of climate information to estimate future mortality from high ambient temperature: A systematic literature review. *PLoS ONE [Electronic Resource]* 2017; **12**: e0180369.
- 73 Witt C, Schubert AJ, Jehn M, *et al.* The Effects of Climate Change on Patients With Chronic Lung Disease. A Systematic Literature Review. *Dtsch Arztebl Int* 2015; **112**: 878–83.
- 74 Xu Z, Sheffield PE, Su H, Wang X, Bi Y, Tong S. The impact of heat waves on children's health: a systematic review. *Int J Biometeorol* 2014; **58**: 239–47.
- 75 Xu Z, FitzGerald G, Guo Y, Jalaludin B, Tong S. Impact of heatwave on mortality under different heatwave definitions: A systematic review and meta-analysis. *Environ Int* 2016; **89-90**: 193–203.
- 76 Yu W, Mengersen K, Wang X, *et al.* Daily average temperature and mortality among the elderly: a meta-analysis and systematic review of epidemiological evidence. *Int J Biometeorol* 2012; **56**: 569–81.
- 77 Doocy S, Dick A, Daniels A, Kirsch TD. The Human Impact of Tropical Cyclones: A Historical Review of Events 1980-2009 and Systematic Literature Review. *PLoS Curr*

2013. DOI:10.1371/currents.dis.2664354a5571512063ed29d25ffbce74.
- 78 Madaniyazi L, Guo Y, Yu W, Tong S. Projecting future air pollution-related mortality under a changing climate: Progress, uncertainties and research needs. *Environ Int* 2015; **75**: 21–32.
- 79 Liu JC, Pereira G, Uhl SA, Bravo MA, Bell ML. A systematic review of the physical health impacts from non-occupational exposure to wildfire smoke. *Environ Res* 2015; **136**: 120–32.
- 80 Reid CE, Brauer M, Johnston FH, Jerrett M, Balmes JR, Elliott CT. Critical Review of Health Impacts of Wildfire Smoke Exposure. *Environ Health Perspect* 2016; **124**: 1334–43.
- 81 Youssouf H, Liousse C, Roblou L, *et al.* Non-accidental health impacts of wildfire smoke. *International Journal of Environmental Research & Public Health [Electronic Resource]* 2014; **11**: 11772–804.
- 82 Cong XW, Xu XJ, Zhang YL, Wang QH, Xu L, Huo X. Temperature drop and the risk of asthma: a systematic review and meta-analysis. *Environ Sci Pollut Res* 2017; **24**: 22535–46.
- 83 Zuo J, Pullen S, Palmer J, Bennetts H, Chileshe N, Ma T. Impacts of heat waves and corresponding measures: a review. *J Clean Prod* 2015; **92**: 1–12.
- 84 Sawatzky A, Cunsolo A, Jones-Bitton A, Middleton J, Harper SL. Responding to Climate and Environmental Change Impacts on Human Health via Integrated Surveillance in the Circumpolar North: A Systematic Realist Review. *International Journal of Environmental Research & Public Health [Electronic Resource]* 2018; **15**: 30.
- 85 Wald A. Emergency Department Visits and Costs for Heat-Related Illness Due to Extreme Heat or Heat Waves in the United States: An Integrated Review. *Nurs Econ* 2019; **37**: 35–48.
- 86 Gao JJ, Cheng Q, Duan J, *et al.* Ambient temperature, sunlight duration, and suicide: A systematic review and meta-analysis. *Sci Total Environ* 2019; **646**: 1021–9.
- 87 Benevolenza MA, DeRigne L. The impact of climate change and natural disasters on vulnerable populations: A systematic review of literature. *J Hum Behav Soc Environ* 2019; **29**: 266–81.
- 88 Rataj E, Kunzweiler K, Garthus-Niegel S. Extreme weather events in developing countries and related injuries and mental health disorders - a systematic review. *BMC Public Health* 2016; **16**: 1020–1020.
- 89 Fernandez A, Black J, Jones M, *et al.* Flooding and Mental Health: A Systematic Mapping Review. *PLoS ONE [Electronic Resource]* 2015; **10**. DOI:10.1371/journal.pone.0119929.
- 90 Carolan-Olah M, Frankowska D. High environmental temperature and preterm birth: A review of the evidence. *Midwifery* 2014; **30**: 50–9.

- 1  
2  
3 91 Kuehn L, McCormick S. Heat Exposure and Maternal Health in the Face of Climate  
4 Change. *International Journal of Environmental Research & Public Health [Electronic*  
5 *Resource]* 2017; **14**: 29.  
6  
7  
8 92 Poursafa P, Keikha M, Kelishadi R. Systematic review on adverse birth outcomes of climate  
9 change. *J Res Med Sci* 2015; **20**: 397–402.  
10  
11 93 Zhang YQ, Yu CH, Wang L. Temperature exposure during pregnancy and birth outcomes:  
12 An updated systematic review of epidemiological evidence. *Environ Pollut* 2017; **225**: 700–  
13 12.  
14  
15 94 Vilcins D, Sly PD, Jagals P. Environmental Risk Factors Associated with Child Stunting: A  
16 Systematic Review of the Literature. *Annals of Global Health* 2018; **84**: 551–62.  
17  
18 95 Huang KC, Weng HH, Yang TY, Chang TS, Huang TW, Lee MS. Distribution of Fatal  
19 *Vibrio Vulnificus* Necrotizing Skin and Soft-Tissue Infections: A Systematic Review and  
20 Meta-Analysis. *Medicine* 2016; **95**: e2627.  
21  
22  
23 96 Lake IR, Jones NR, Agnew M, *et al.* Climate Change and Future Pollen Allergy in Europe.  
24 *Environ Health Perspect* 2017; **125**: 385–91.  
25  
26 97 Augustin J, Franzke N, Augustin M, Kappas M. Does climate change affect the incidence of  
27 skin and allergic diseases in Germany? *J Dtsch Dermatol Ges* 2008; **6**: 632–8.  
28  
29 98 Binazzi A, Levi M, Bonafede M, *et al.* Evaluation of the impact of heat stress on the  
30 occurrence of occupational injuries: Meta-analysis of observational studies. *Am J Ind Med*  
31 2019; **62**: 233–43.  
32  
33  
34 99 Bonafede M, Marinaccio A, Asta F, Schifano P, Michelozzi P, Vecchi S. The association  
35 between extreme weather conditions and work-related injuries and diseases. A systematic  
36 review of epidemiological studies. *Annali Dell Istituto Superiore Di Sanita* 2016; **52**: 357–  
37 67.  
38  
39  
40 100 Flouris AD, Dinas PC, Ioannou LG, *et al.* Workers' health and productivity under  
41 occupational heat strain: a systematic review and meta-analysis. *The lancet Planetary*  
42 *Health* 2018; **2**: e521–31.  
43  
44 101 Levi M, Kjellstrom T, Baldasseroni A. Impact of climate change on occupational health and  
45 productivity: a systematic literature review focusing on workplace heat. *Medicina del*  
46 *Lavoro* 2018; **109**: 163–79.  
47  
48  
49 102 Varghese BM, Hansen A, Bi P, Pisaniello D. Are workers at risk of occupational injuries  
50 due to heat exposure? A comprehensive literature review. *Saf Sci* 2018; **110**: 380–92.  
51  
52 103 Wimalawansa SA, Wimalawansa SJ. Environmentally induced, occupational diseases with  
53 emphasis on chronic kidney disease of multifactorial origin affecting tropical countries.  
54 *Annals of Occupational and Environmental Medicine* 2016; **28**. DOI:10.1186/s40557-016-  
55 0119-y.  
56  
57  
58  
59  
60

- 1  
2  
3 104 Zhang Y, Bi P, Hiller JE. Climate change and disability -- adjusted life years. *J Environ*  
4 *Health* 2007; **70**: 32–6.  
5  
6  
7 105 Park KY, Kim HJ, Ahn HS, Yim SY, Jun JB. Association between acute gouty arthritis and  
8 meteorological factors: An ecological study using a systematic review and meta-analysis.  
9 *Semin Arthritis Rheum* 2017; **47**: 369–75.  
10  
11 106 Kampe EOI, Kovats S, Hajat S. Impact of high ambient temperature on unintentional  
12 injuries in high-income countries: a narrative systematic literature review. *BMJ Open* 2016;  
13 **6**. DOI:10.1136/bmjopen-2015-010399.  
14  
15 107 Rifkin DI, Long MW, Perry MJ. Climate change and sleep: A systematic review of the  
16 literature and conceptual framework. *Sleep Med Rev* 2018; **42**: 3–9.  
17  
18 108 Clayton S. Climate anxiety: Psychological responses to climate change. *J Anxiety Disord*  
19 2020; **74**: 102263.  
20  
21  
22 109 Davenport L. Emotional Resiliency in the Era of Climate Change: A Clinician's Guide.  
23 London: Jessica Kingsley Publishers, 2017.  
24  
25 110 Maibach EW, Nisbet M, Baldwin P, Akerlof K, Diao G. Reframing climate change as a  
26 public health issue: an exploratory study of public reactions. *BMC Public Health* 2010; **10**:  
27 299.  
28  
29  
30 111 Stoknes PE. What we think about when we try not to think about global warming: Toward a  
31 new psychology of climate action. *White River Junction, Vermont: Chelsea Green*  
32 *Publishing* 2015.  
33  
34 112 Costello A, Montgomery H, Watts N. Climate change: the challenge for healthcare  
35 professionals. *BMJ* 2013; **347**: f6060.  
36  
37 113 Yang L, Liu C, Hess J, Phung D, Huang C. Health professionals in a changing climate:  
38 protocol for a scoping review. *BMJ Open* 2019; **9**: e024451.  
39  
40  
41  
42  
43  
44  
45  
46  
47  
48  
49  
50  
51  
52  
53  
54  
55  
56  
57  
58  
59  
60



# Figure Legends

**Figure 1. The flow chart for included articles in this review.**

**Figure 2. Number of included systematic reviews by year of publication.**

**Figure 3. Number of publications according to geographic affiliation of the first author.**

\*Countries of origin within continents in frequency order (highest to lowest frequency) and alphabetical: **Europe:** United-Kingdom (9), Germany (6), Italy (4), Sweden (4), Denmark (2), France (2), Georgia (1), Greece (1) and Finland (1). **Australia:** All Australia. **Asia:** China (11), Iran (4), India (1), Jordan (1), Korea (1), Nepal (1), Philippines (1), Taiwan (1). **North America:** United-States (15), Canada (1). **Africa:** Ethiopia (1), Ghana (1). **South America:** Brazil (1).

**Figure 4. Summary of the combination of climate impact and health outcome**

**(frequencies).** *Note:* The total frequency for one category of health outcome could exceed the number of publications included in this health outcome, since one publication could explore the health impact according to more than one climate factor (e.g., one publication could explore both the impact of extreme weather events and temperature on mental health.)

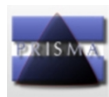

**PRISMA 2009 Flow Diagram**

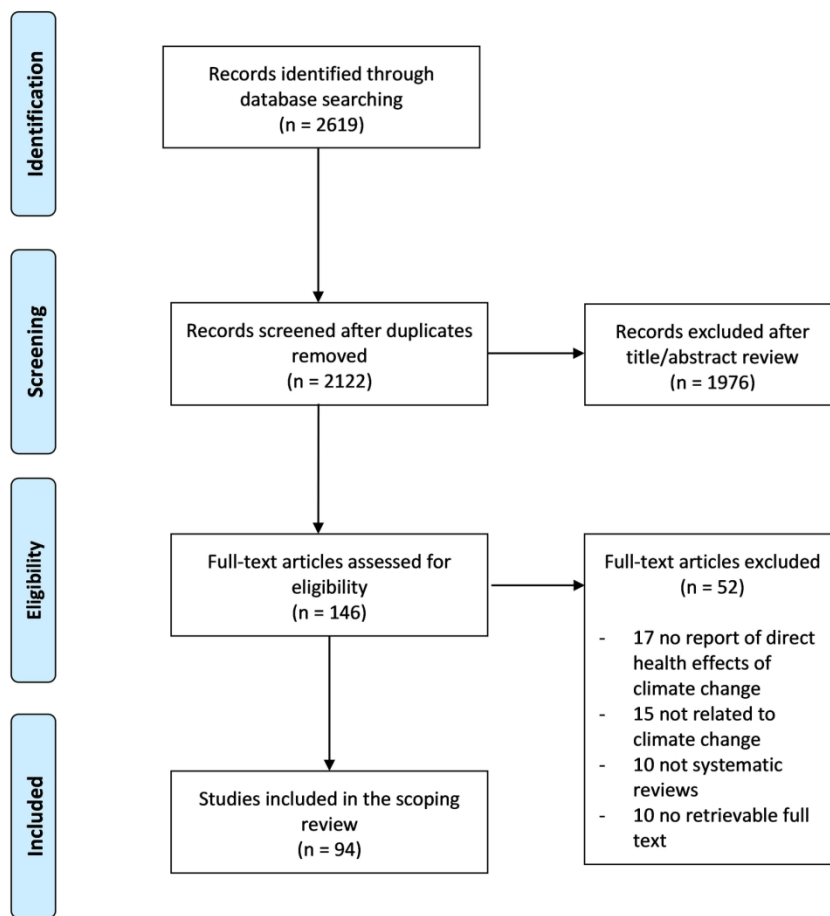

Figure 1. The flow chart for included articles in this review.

165x174mm (300 x 300 DPI)

1  
2  
3  
4  
5  
6  
7  
8  
9  
10  
11  
12  
13  
14  
15  
16  
17  
18  
19  
20  
21  
22  
23  
24  
25  
26  
27  
28  
29  
30  
31  
32  
33  
34  
35  
36  
37  
38  
39  
40  
41  
42  
43  
44  
45  
46  
47  
48  
49  
50  
51  
52  
53  
54  
55  
56  
57  
58  
59  
60

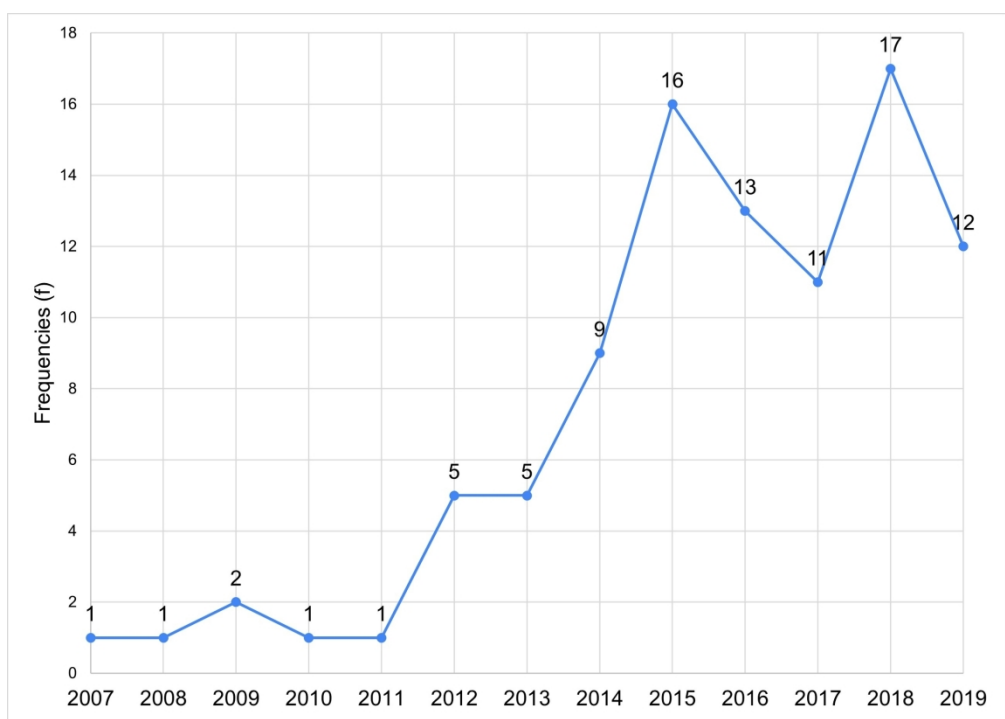

Figure 2. Number of included systematic reviews by year of publication.

199x141mm (300 x 300 DPI)

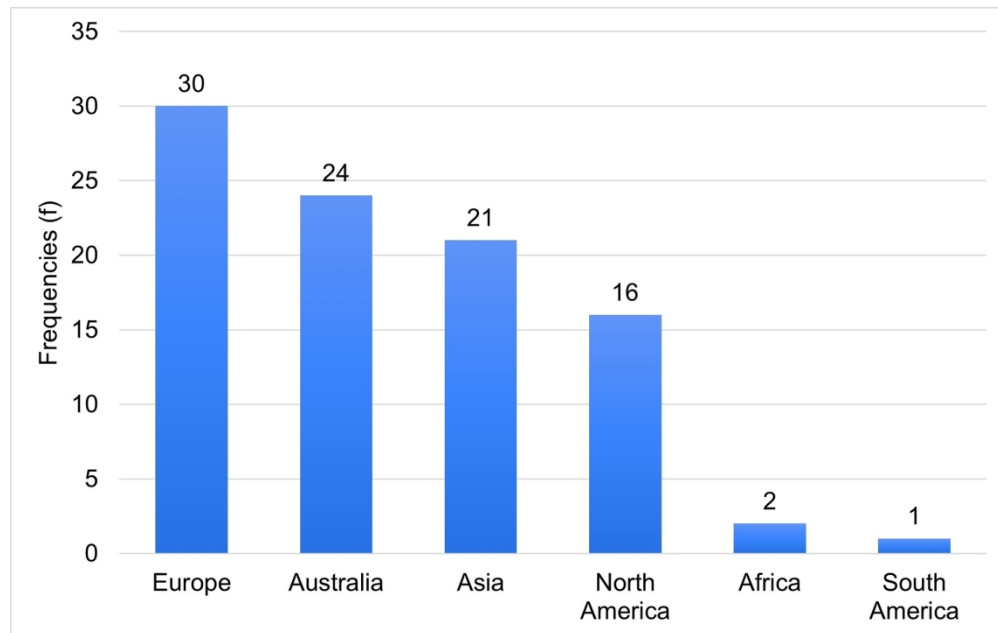

Figure 3. Number of publications according to geographic affiliation of the first author.

\*Countries of origin within continents in frequency order (highest to lowest frequency) and alphabetical: Europe: United-Kingdom (9), Germany (6), Italy (4), Sweden (4), Denmark (2), France (2), Georgia (1), Greece (1) and Finland (1). Australia: All Australia. Asia: China (11), Iran (4), India (1), Jordan (1), Korea (1), Nepal (1), Philippines (1), Taiwan (1). North America: United-States (15), Canada (1). Africa: Ethiopia (1), Ghana (1). South America: Brazil (1).

171x108mm (300 x 300 DPI)

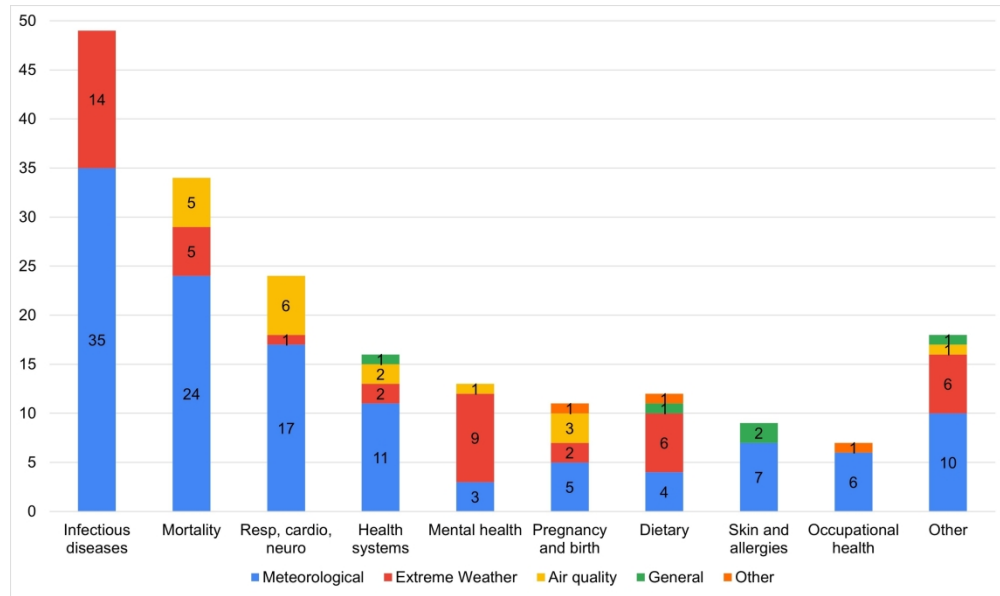

Figure 4. Summary of the combination of climate impact and health outcome (frequencies). Note: The total frequency for one category of health outcome could exceed the number of publications included in this health outcome, since one publication could explore the health impact according to more than one climate factor (e.g., one publication could explore both the impact of extreme weather events and temperature on mental health.)

270x160mm (300 x 300 DPI)

## Appendix 1. Search Strategy

Database: **MEDLINE (OVID)**

No database limit

| Concepts                                     | #  | Search strategy                                                 |
|----------------------------------------------|----|-----------------------------------------------------------------|
| Global Warming                               | 1  | exp Climate Change/                                             |
|                                              | 2  | "Global warming".ti,ab,kw                                       |
|                                              | 3  | "Climate Change?".ti,ab,kw                                      |
| Global Warming combined                      | 4  | or/1-3                                                          |
| Systematic review and meta-analysis          | 5  | exp Meta-Analysis as Topic/                                     |
|                                              | 6  | "Meta-Analysis"/                                                |
|                                              | 7  | Meta-Analysis.ti,ab,kw                                          |
|                                              | 8  | "meta analy*".ti,ab,kw                                          |
|                                              | 9  | metaanaly*.ti,ab,kw                                             |
|                                              | 10 | "Systematic Review"/                                            |
|                                              | 11 | "Systematic Reviews as Topic"/                                  |
|                                              | 12 | (systematic adj2 review).ti,ab,kw                               |
|                                              | 13 | (review adj1 ("selection criteria" OR "data extraction")).ti,ab |
| Systematic review and meta-analysis combined | 14 | or/5-13                                                         |
| Combination of concepts                      | 15 | 4 AND 14                                                        |

Database: **Embase.com**

No database limit

| Concepts                                     | #  | Search strategy                                                   |
|----------------------------------------------|----|-------------------------------------------------------------------|
| Global Warming                               | 1  | 'climate change'/de                                               |
|                                              | 2  | 'greenhouse effect'/de                                            |
|                                              | 3  | "Global warming":ti,ab,kw                                         |
|                                              | 4  | "Climate Change*":ti,ab,kw                                        |
| Global Warming combined                      | 5  | #1 OR #2 OR #3 OR #4                                              |
| Systematic review and meta-analysis          | 6  | 'meta analysis'/exp                                               |
|                                              | 7  | 'meta analysis (topic)'/de                                        |
|                                              | 8  | Meta-Analysis:ti,ab,kw                                            |
|                                              | 9  | "meta analy*":ti,ab,kw                                            |
|                                              | 10 | metaanaly*:ti,ab,kw                                               |
|                                              | 11 | 'systematic review'/de                                            |
|                                              | 12 | (systematic NEAR/2 review):ti,ab,kw                               |
|                                              | 13 | (review NEAR/2 ("selection criteria" OR "data extraction")):ti,ab |
| Systematic review and meta-analysis combined | 14 | #7 OR #8 OR #9 OR #10 OR #11 OR #12 OR #13 OR #14                 |

|                         |    |                                                       |
|-------------------------|----|-------------------------------------------------------|
| Combination of concepts | 15 | #14 AND #5                                            |
| Embase database only    | 16 | AND [embase]/lim NOT ([embase]/lim AND [medline]/lim) |

Database: **Web of Science**

Limit to: Science Citation Index Expanded (SCI-EXPANDED) and Emerging Sources Citation Index (ESCI) index only

| Concepts                                     | # | Search strategy                                                |
|----------------------------------------------|---|----------------------------------------------------------------|
| Global Warming                               | 1 | TS=("Global warming" OR "Climate Change\$")                    |
| Systematic review and meta-analysis          | 2 | TS=(Meta-Analysis)                                             |
|                                              | 3 | TS=("meta analy*")                                             |
|                                              | 4 | TS=(metaanaly*)                                                |
|                                              | 5 | TS=(systematic NEAR/2 review)                                  |
|                                              | 6 | TS=(review NEAR/1 ("selection criteria" OR "data extraction")) |
| Systematic review and meta-analysis combined | 7 | #6 OR #5 OR #4 OR #3 OR #2                                     |
| Combination of concepts                      | 8 | #7 AND #1                                                      |

Database: **CINAHL**

No database limit

| Concepts       | # | Search strategy     |
|----------------|---|---------------------|
| Global Warming | 1 | MH "Climate Change" |



|                                     |    |                                                            |
|-------------------------------------|----|------------------------------------------------------------|
|                                     | 2  | MH "Greenhouse Effect"                                     |
|                                     | 3  | TI "Global warming"                                        |
|                                     | 4  | TI "Climate Change?"                                       |
|                                     | 5  | AB "Global warming"                                        |
|                                     | 6  | AB "Climate Change?"                                       |
| Global Warming combined             | 7  | S1 OR S2 OR S3 OR S4 OR S5 OR S6                           |
| Systematic review and meta-analysis | 8  | MH "Meta Analysis"                                         |
|                                     | 9  | TI "Meta-Analysis"                                         |
|                                     | 10 | AB "Meta-Analysis"                                         |
|                                     | 11 | TI "meta analy**"                                          |
|                                     | 12 | AB "meta analy**"                                          |
|                                     | 13 | TI metaanaly*                                              |
|                                     | 14 | AB metaanaly*                                              |
|                                     | 15 | MH "Systematic Review"                                     |
|                                     | 16 | TI (systematic N2 review)                                  |
|                                     | 17 | AB (systematic N2 review)                                  |
|                                     | 18 | TI (review N1 ("selection criteria" OR "data extraction")) |
|                                     | 19 | AB (review N1 ("selection criteria" OR "data extraction")) |

|                                              |    |                                                                                |
|----------------------------------------------|----|--------------------------------------------------------------------------------|
| Systematic review and meta-analysis combined | 20 | S8 OR S9 OR S10 OR S11 OR S12 OR S13 OR S14 OR S15 OR S16 OR S17 OR S18 OR S19 |
| Combination of concepts                      | 21 | S7 AND S20                                                                     |

For peer review only

**Appendix 2.** Summary of AMSTAR-2 items and modified AMSTAR-2 items.

| Item # | AMSTAR-2 Original Item                                                                                                                                                                                                                                                                  | AMSTAR-2 Modifications                                                                                                                                                                                                                                                                                 |
|--------|-----------------------------------------------------------------------------------------------------------------------------------------------------------------------------------------------------------------------------------------------------------------------------------------|--------------------------------------------------------------------------------------------------------------------------------------------------------------------------------------------------------------------------------------------------------------------------------------------------------|
| 1      | <p>Did the research questions and inclusion criteria for the review include components of PICO?</p> <ul style="list-style-type: none"> <li>- Population</li> <li>- Intervention</li> <li>- Comparator group</li> <li>- Outcome</li> <li>- Timeframe for follow-up (optional)</li> </ul> | <p>“Population” became “Population and/or location”.</p> <p>“Intervention” became “Exposure”.</p> <p>The “Comparator group” category was taken out.</p> <p>A new section (#1.b)) was created, it includes “Definition of the exposure”, “Definition of the outcome” and “Timeframe for follow up”.</p> |
| 2      | <p>Did the report of the review contain an explicit statement that the review methods were established prior to the conduct of the review and did the report justify any significant deviations from the protocol?</p>                                                                  | <p>To score “yes”, a protocol must have been established before the review. There are no sub-criterias, you can only score yes or no.</p>                                                                                                                                                              |
| 3      | <p>Did the review authors explain their selection of the study designs for inclusion in the review?</p>                                                                                                                                                                                 | <p>If the study designs are specified, you score “partial yes”. They must be explained to score “yes”. No specific study design is required.</p>                                                                                                                                                       |
| 4      | <p>Did the review authors use a comprehensive literature search strategy?</p>                                                                                                                                                                                                           | <p>The “searched trial/study registries” category was taken out.</p> <p>Justified publication restrictions (e.g. language) moved from (partial yes) to (yes)</p>                                                                                                                                       |
| 5      | <p>Did the review authors perform study selection in duplicate?</p>                                                                                                                                                                                                                     | <p>No modifications.</p>                                                                                                                                                                                                                                                                               |
| 6      | <p>Did the review authors perform data extraction in duplicate?</p>                                                                                                                                                                                                                     | <p>No modifications.</p>                                                                                                                                                                                                                                                                               |
| 7      | <p>Did the review authors provide a list of excluded studies and justify the exclusion?</p>                                                                                                                                                                                             | <p>The explanation of the inclusion and exclusion criteria is evaluated.</p> <p>If there is only one out of the two, you score “partial yes”. The two must be explained to score “yes”.</p>                                                                                                            |
| 8      | <p>Did the review authors describe the included studies in adequate detail?</p>                                                                                                                                                                                                         | <p>“Populations” became “Populations and/or locations”.</p> <p>“Interventions” became “Exposures”.</p> <p>“Comparator groups” became “Comparator groups (if applicable)”.</p> <p>“Populations and/or locations”, “Exposures” and “Outcomes” must be described in details to score “yes”</p>            |
| 9      | <p>Did the review authors use a satisfactory technique for assessing the risk of bias (RoB) in individual studies that were included in the review?</p>                                                                                                                                 | <p>“RoB” became “limitations”. Instead of assessing the RoB, the review authors must have used a satisfactory technique for assessing the limitations in individual studies that were included in the review.</p>                                                                                      |

|    |                                                                                                                                                                                                        |                                                                                                                                                                                                  |
|----|--------------------------------------------------------------------------------------------------------------------------------------------------------------------------------------------------------|--------------------------------------------------------------------------------------------------------------------------------------------------------------------------------------------------|
| 10 | Did the review authors report on the sources of funding for the studies included in the review?                                                                                                        | No modifications.                                                                                                                                                                                |
| 11 | If meta-analysis was performed did the review authors use appropriate methods for statistical combination of results?                                                                                  | No modifications.                                                                                                                                                                                |
| 12 | If meta-analysis was performed, did the review authors assess the potential impact of RoBin individual studies on the results of the meta-analysis or other evidence synthesis                         | No modifications.                                                                                                                                                                                |
| 13 | Did the review authors account for RoB in individual studies when interpreting/discussing the results of the review?                                                                                   | “RoB” became “limitations”. Instead of accounting for RoB in individual studies, the review authors must have accounted for limitations when interpreting/ discussing the results of the review. |
| 14 | Did the review authors provide a satisfactory explanation for, and discussion of, any heterogeneity observed in the results of the review?                                                             | No modifications.                                                                                                                                                                                |
| 15 | If they performed quantitative synthesis did the review authors carry out an adequate investigation of publication bias (small study bias) and discuss its likely impact on the results of the review? | No modifications.                                                                                                                                                                                |
| 16 | Did the review authors report any potential sources of conflict of interest, including any funding they received for conducting the review?                                                            | No modifications.                                                                                                                                                                                |

1  
2  
3  
4  
5  
6  
7  
8  
9  
10  
11  
12  
13  
14  
15  
16  
17  
18  
19  
20  
21  
22  
23  
24  
25  
26  
27  
28  
29  
30  
31  
32  
33  
34  
35  
36  
37  
38  
39  
40  
41  
42  
43  
44  
45  
46  
47

**Appendix 3.** Overview of included studies (N=94) according to study characteristics and summary of climate impacts on health outcomes. Studies are presented in alphabetical order according to the first author's last name.

|   | First Author | Year | Country       | Years of included publications | Years of the studies included in the reviews | # of articles | Meta-analysis | Specific Area of focus | Specific Population of interest | Climate Impact  | Health Outcome                                                                                                                                              | Summary of findings                                                                                                                                                                                                                                                     |
|---|--------------|------|---------------|--------------------------------|----------------------------------------------|---------------|---------------|------------------------|---------------------------------|-----------------|-------------------------------------------------------------------------------------------------------------------------------------------------------------|-------------------------------------------------------------------------------------------------------------------------------------------------------------------------------------------------------------------------------------------------------------------------|
| 1 | Alderman     | 2012 | Australia     | 2004-2011                      | 1931-2007                                    | 35            | No            |                        |                                 | Extreme weather | Infectious diseases<br>Mortality<br>Health systems<br>Mental health<br>Pregnancy and birth<br>Other                                                         | Floods are associated with infectious diseases (water- and vector-borne diseases), mortality (e.g., drowning), exacerbation of chronic illnesses, mental health issues (e.g., PTSD), hospital admissions, pregnancy outcomes and injuries.                              |
| 2 | Amegah       | 2016 | Ghana         | 1995-2014                      | 1960-2010                                    | 23            | No            | Sub-saharan Africa     |                                 | Meteorological  | Infectious diseases<br>Mortality<br>Respiratory, cardiovascular and pulmonary, and neurological outcomes<br>Health systems<br>Dietary<br>Skin and allergies | Temperature and temperature variability are suggested to be associated with infectious diseases, such as Ebola, cardiovascular diseases, mortality, cholera outbreaks, meningitis, undernutrition in children, respiratory outcomes, such as asthma, and skin diseases. |
| 3 | An           | 2018 | United States | 2002-2017                      | 2002-2016                                    | 50            | No            |                        |                                 | General         | Dietary                                                                                                                                                     | Climate change is associated with obesity. This association can be explained in 4 ways, such that climate change may impact obesity, obesity may impact climate change, both                                                                                            |

|    |             |      |               |           |           |     |     |          |                        |                                   |                                               |                                                                                                                                                                                                                       |
|----|-------------|------|---------------|-----------|-----------|-----|-----|----------|------------------------|-----------------------------------|-----------------------------------------------|-----------------------------------------------------------------------------------------------------------------------------------------------------------------------------------------------------------------------|
|    |             |      |               |           |           |     |     |          |                        |                                   |                                               | factors may be associated with common causes, or both factors may influence each other.                                                                                                                               |
| 4  | Augustin    | 2008 | Germany       | 1996-2006 | NS        | 320 | No  | Germany  |                        | Meteorological                    | Skin and allergies                            | Although skin and allergic diseases are climate sensitive, there is not sufficient evidence to suggest a prediction concerning skin and allergic diseases linked to climate change in Germany.                        |
| 5  | Babaie      | 2018 | Iran          | 2007-2017 | 1970-2015 | 14  | No  | Iran     |                        | Meteorological                    | Infectious diseases                           | Temperature, precipitation and humidity are associated with the risk of transmission of Malaria.                                                                                                                      |
| 6  | Bai         | 2013 | China         | 1995-2011 | 1951-2010 | 57  | No  | China    |                        | Meteorological                    | Infectious diseases                           | Variability in temperature, precipitation and wind are associated with the risk of transmission of mosquito-borne diseases.                                                                                           |
| 7  | Benevolenza | 2019 | United States | 2006-2017 | 2005-2015 | 13  | No  |          | Vulnerable populations | Extreme weather                   | Mental health<br>Pregnancy and birth<br>Other | Extreme weather events are associated with an exacerbation of pre-existing chronic health conditions, mental health issues (e.g., PTSD, isolation) and adverse birth outcomes.                                        |
| 8  | Berhane     | 2016 | Ethiopia      | NS        | NS        | 23  | No  | Ethiopia |                        | Meteorological<br>Extreme weather | Infectious diseases<br>Dietary                | Meteorological factors and extreme weather events are associated with under- and mal- nutrition and the increased risk of climate sensitive infectious diseases (e.g., malaria, diarrhea, zoonotic infections, etc.). |
| 9  | Bernhardt   | 2019 | Germany       | 1997-2017 | NS        | 464 | No  |          |                        | Meteorological                    | Infectious diseases                           | Rising temperatures are predicted to be associated with myiasis in the future.                                                                                                                                        |
| 10 | Binazzi     | 2019 | Italy         | NS        | 1994-2013 | 8   | Yes |          | Workers                | Meteorological                    | Occupational health and injuries              | High temperatures are positively associated with occupational injuries.                                                                                                                                               |
| 11 | Bonafede    | 2016 | Italy         | 2000-2014 | 1985-2010 | 8   | No  |          | Workers                | Meteorological                    | Occupational health and injuries              | Extreme temperature (particularly heat) is associated with occupational injuries.                                                                                                                                     |

|    |              |      |                |           |           |     |     |        |                           |                 |                                                                                                                                     |                                                                                                                                                                                                                |
|----|--------------|------|----------------|-----------|-----------|-----|-----|--------|---------------------------|-----------------|-------------------------------------------------------------------------------------------------------------------------------------|----------------------------------------------------------------------------------------------------------------------------------------------------------------------------------------------------------------|
| 12 | Brown        | 2013 | United Kingdom | 2004-2012 | 1975-2012 | 38  | No  | Europe |                           | Extreme weather | Infectious diseases                                                                                                                 | Floods are associated with infectious diseases, including water-, rodent- and vector-borne diseases (from weeks to months after flooding).                                                                     |
| 13 | Bunker       | 2016 | Germany        | 1995-2015 | 1974-2013 | 61  | Yes |        | Elderly                   | Meteorological  | Mortality<br>Respiratory, cardiovascular and pulmonary, and neurological outcomes<br>Other                                          | Higher and lower temperatures are associated with cardiovascular and respiratory morbidity and mortality. Heat is also associated with diabetes and genitourinary infections.                                  |
| 14 | Campbell     | 2018 | Australia      | 1964-2017 | NS        | 188 | No  |        |                           | Meteorological  | Mortality<br>Health systems                                                                                                         | Most studies exploring the heat impacts on health focus on mortality outcomes, followed by hospital admissions and ambulance call outs.                                                                        |
| 15 | Cann         | 2013 | United Kingdom | 1973-2010 | NS        | 83  | No  |        |                           | Extreme weather | Infectious diseases                                                                                                                 | Extreme water-related events are associated with outbreaks of water-related infectious diseases.                                                                                                               |
| 16 | Carolan-Olah | 2014 | Australia      | 1997-2012 | 1988-2009 | 7   | No  |        |                           | Meteorological  | Pregnancy and birth                                                                                                                 | High temperatures are associated with preterm birth.                                                                                                                                                           |
| 17 | Cheng        | 2014 | China          | 1990-2013 | 1941-2012 | 25  | No  |        | Adults, Elderly, Children | Meteorological  | Infectious diseases<br>Mortality<br>Respiratory, cardiovascular and pulmonary, and neurological outcomes<br>Health systems<br>Other | Diurnal temperature range is associated with mortality and cardiovascular and respiratory outcomes, hospital admissions, and Hand Foot Mouth disease in children and genitourinary outcomes among the elderly. |
| 18 | Coates       | 2019 | Denmark        | 2003-2018 | NS        | 72  | No  |        |                           | Meteorological  | Infectious diseases                                                                                                                 | Some meteorological factors (temperature, humidity) are positively associated with Hand Foot Mouth                                                                                                             |

1  
2  
3  
4  
5  
6  
7  
8  
9  
10  
11  
12  
13  
14  
15  
16  
17  
18  
19  
20  
21  
22  
23  
24  
25  
26  
27  
28  
29  
30  
31  
32  
33  
34  
35  
36  
37  
38  
39  
40  
41  
42  
43  
44  
45  
46  
47

|    |         |      |               |           |           |     |     |                         |  |                 |                                                                                             |                                                                                                                                                                                                                                                                    |
|----|---------|------|---------------|-----------|-----------|-----|-----|-------------------------|--|-----------------|---------------------------------------------------------------------------------------------|--------------------------------------------------------------------------------------------------------------------------------------------------------------------------------------------------------------------------------------------------------------------|
|    |         |      |               |           |           |     |     |                         |  |                 |                                                                                             | disease (HFMD). Precipitation, wind speed and sunshine are not associated with HFMD.                                                                                                                                                                               |
| 19 | Cong    | 2017 | China         | 1994-2015 | 1982-2013 | 26  | Yes |                         |  | Meteorological  | Respiratory, cardiovascular and pulmonary, and neurological outcomes                        | Temperature drop is associated with asthma.                                                                                                                                                                                                                        |
| 20 | Cunrui  | 2011 | Australia     | 1997-2010 | 1961-2100 | 14  | No  |                         |  | Meteorological  | Mortality                                                                                   | Higher temperature is associated with heat-related mortality.                                                                                                                                                                                                      |
| 21 | deSousa | 2018 | Brazil        | 1976-2016 | NS        | 106 | No  |                         |  | Meteorological  | Infectious diseases<br>Respiratory, cardiovascular and pulmonary, and neurological outcomes | Meteorological factors (e.g., temperature, precipitation) are associated with infectious diseases (e.g., dengue, malaria) and cardiovascular and respiratory outcomes.                                                                                             |
| 22 | Dhimal  | 2015 | Nepal         | 1956-2014 | 1948-2098 | 50  | No  | Nepal                   |  | Meteorological  | Infectious diseases                                                                         | Higher temperatures are associated with the distribution of vector-borne diseases.                                                                                                                                                                                 |
| 23 | Doocy   | 2013 | United States | 1975-2011 | 1974-2008 | 60  | No  |                         |  | Extreme weather | Mortality<br>Other                                                                          | Cyclones are associated with mortality (e.g., drowning) and injuries.                                                                                                                                                                                              |
| 24 | Duan    | 2019 | China         | 2010-2018 | 2000-2016 | 51  | Yes | Southeast and East Asia |  | Meteorological  | Infectious diseases                                                                         | Some meteorological factors (mean maximum temperature, rainfall, humidity and sunshine) are positively associated with Hand Foot Mouth disease (HFMD), whereas air pressure is negatively associated with this disease and wind speed is not associated with HFMD. |
| 25 | Fan     | 2015 | China         | 2004-2013 | 1985-2012 | 33  | Yes |                         |  | Meteorological  | Infectious diseases                                                                         | Temperature is positively associated with transmission and incidence of Dengue.                                                                                                                                                                                    |



|    |            |      |           |           |           |     |     |        |          |                 |                                                                                                                   |                                                                                                                                                                                                                        |
|----|------------|------|-----------|-----------|-----------|-----|-----|--------|----------|-----------------|-------------------------------------------------------------------------------------------------------------------|------------------------------------------------------------------------------------------------------------------------------------------------------------------------------------------------------------------------|
| 26 | Fernandez  | 2015 | Australia | 1995-2014 | NS        | 83  | No  |        |          | Extreme weather | Mental health                                                                                                     | Floods are associated with negative mental health outcomes (e.g., PTSD, increased anxiety, depression, use of psychotropic medication). Conflicting evidence concerning suicide, tobacco, alcohol and substance abuse. |
| 27 | Flouris    | 2018 | Greece    | 1954-2018 | NS        | 111 | Yes |        | Workers  | Meteorological  | Occupational health and injuries                                                                                  | High temperatures are positively associated with occupational heat strains, dehydration, kidney diseases and injuries.                                                                                                 |
| 28 | Gao        | 2019 | China     | 1994-2018 | 1969-2015 | 16  | Yes |        |          | Meteorological  | Mental health                                                                                                     | Temperature increase is associated with suicide. No association between sunlight duration and suicide.                                                                                                                 |
| 29 | Gao        | 2014 | China     | 1996-2012 | 1971-2010 | 37  | No  |        | Children | Meteorological  | Infectious diseases<br>Respiratory, cardiovascular and pulmonary, and neurological outcomes<br>Skin and allergies | Ambient humidity is associated with gastrointestinal, respiratory and allergic diseases in children.                                                                                                                   |
| 30 | Ghanizadeh | 2017 | Iran      | 2009-2016 | 1990-2015 | 13  | No  |        |          | Meteorological  | Mortality<br>Respiratory, cardiovascular and pulmonary, and neurological outcomes                                 | Meteorological factors, such as temperature and humidity, are associated with cardiopulmonary health. Cold temperatures are also associated with mortality from heart diseases.                                        |
| 31 | Ghazani    | 2018 | Australia | 2006-2017 | 1991-2011 | 11  | No  |        |          | Meteorological  | Infectious diseases                                                                                               | Higher temperature is associated with bacterial gastrointestinal infections. Humidity and rainfall may influence this association.                                                                                     |
| 32 | Gracia     | 2015 | Sweden    | 2003-2011 | 1959-2008 | 9   | No  | Europe |          | Meteorological  | Infectious diseases                                                                                               | Temperature is positively associated with Human Puumala Hantavirus in some regions of Europe. Results                                                                                                                  |

|    |         |      |                |           |           |    |     |                       |                        |                                                  |                                                                                                                                                                    |                                                                                                                                                                                                                                                                                                                                                                                                                                                                                                 |
|----|---------|------|----------------|-----------|-----------|----|-----|-----------------------|------------------------|--------------------------------------------------|--------------------------------------------------------------------------------------------------------------------------------------------------------------------|-------------------------------------------------------------------------------------------------------------------------------------------------------------------------------------------------------------------------------------------------------------------------------------------------------------------------------------------------------------------------------------------------------------------------------------------------------------------------------------------------|
|    |         |      |                |           |           |    |     |                       |                        |                                                  |                                                                                                                                                                    | concerning precipitation and humidity are contradictory or null.                                                                                                                                                                                                                                                                                                                                                                                                                                |
| 33 | Hajat   | 2010 | United Kingdom | 1994-2008 | 1973-2003 | 11 | No  |                       |                        | Meteorological                                   | Mortality                                                                                                                                                          | Ambient heat is associated with mortality.                                                                                                                                                                                                                                                                                                                                                                                                                                                      |
| 34 | Hedlund | 2014 | Sweden         | 1970-2012 | 1750-2009 | 29 | No  | Arctic, sub-Arctic    | Vulnerable populations | Meteorological<br>Extreme weather                | Infectious diseases                                                                                                                                                | Higher temperatures and flooding are associated with food- and water-borne diseases. This association is weaker for vector- and rodent-borne diseases. Air temperature and humidity seem to be associated with air-borne diseases.                                                                                                                                                                                                                                                              |
| 35 | Hii     | 2016 | Sweden         | 2007-2015 | 2003-2012 | 9  | No  | Malaysia              |                        | Meteorological                                   | Infectious diseases                                                                                                                                                | Some meteorological factors (temperature, rainfall and humidity) are associated with Dengue, although these associations are inconsistent at times.                                                                                                                                                                                                                                                                                                                                             |
| 36 | Huang   | 2016 | Taiwan         | 1990-2014 | 1978-2011 | 19 | Yes |                       |                        | General                                          | Skin and allergies                                                                                                                                                 | Climate change, in general, may be associated with skin and soft-tissue infections.                                                                                                                                                                                                                                                                                                                                                                                                             |
| 37 | Kampe   | 2016 | United Kingdom | 1998-2015 | 1971-2010 | 13 | No  | High-income countries |                        | Meteorological                                   | Other                                                                                                                                                              | Higher temperature is associated with unintentional injuries.                                                                                                                                                                                                                                                                                                                                                                                                                                   |
| 38 | Khader  | 2015 | Jordan         | 2003-2014 | 1991-2012 | 78 | No  | Eastern Mediterranean | Vulnerable countries   | Meteorological<br>Extreme weather<br>Air quality | Infectious diseases<br>Mortality<br>Respiratory, cardiovascular and pulmonary, and neurological outcomes<br>Health systems<br>Mental health<br>Pregnancy and birth | High temperature is associated with mortality. Temperature, humidity and precipitation are associated with vector-, food- and water-borne diseases. Air pollution is associated with respiratory outcomes, although some findings are inconsistent. Higher temperature is associated with mental health outcomes and hospital admissions. Higher temperature may also be associated with adverse birth outcomes. Meteorological and extreme weather events are associated with food insecurity. |

|    |         |      |                |           |           |     |     |             |                 |                                   |                                                                                   |                                                                                                                                                                                  |
|----|---------|------|----------------|-----------|-----------|-----|-----|-------------|-----------------|-----------------------------------|-----------------------------------------------------------------------------------|----------------------------------------------------------------------------------------------------------------------------------------------------------------------------------|
|    |         |      |                |           |           |     |     |             |                 |                                   | Dietary                                                                           |                                                                                                                                                                                  |
| 39 | Klinger | 2014 | United Kingdom | 2011-2013 | NS        | 20  | No  |             |                 | Extreme weather                   | Health systems                                                                    | Extreme weather events may lead to power outages which may pose challenges to healthcare quality.                                                                                |
| 40 | Kuehn   | 2017 | United States  | 2002-2017 | NS        | 28  | No  |             | Pregnant people | Meteorological                    | Pregnancy and birth                                                               | Extreme heat exposure is associated with adverse birth outcomes (e.g. stillbirth, birth weight).                                                                                 |
| 41 | Lake    | 2017 | United Kingdom | NS        | NS        | 66  | No  | Europe      |                 | General                           | Skin and allergies                                                                | Climate change may be associated with ragweed pollen allergy.                                                                                                                    |
| 42 | Lal     | 2019 | Australia      | 1982-2011 | NS        | 36  | Yes |             | Children        | Meteorological                    | Infectious diseases                                                               | Rainfall is associated with childhood diarrhea, although this association differed according to season and latitude.                                                             |
| 43 | Lal     | 2015 | Australia      | NS        | NS        | 16  | No  | New Zealand |                 | Meteorological                    | Infectious diseases                                                               | Temperature variability, higher temperature and rainfall are associated with enteric diseases.                                                                                   |
| 44 | Lawton  | 2019 | Australia      | 2000-2015 | NS        | 71  | No  |             |                 | Meteorological                    | Mortality<br>Respiratory, cardiovascular and pulmonary, and neurological outcomes | Heat exposure is associated with heat stroke, long-term neurological outcomes (e.g., cerebellar injury) and heat-related mortality.                                              |
| 45 | Levi    | 2018 | Italy          | 2003-2017 | 1977-2014 | 184 | No  |             | Workers         | Meteorological                    | Occupational health and injuries                                                  | Heat exposure is associated with occupational injuries.                                                                                                                          |
| 46 | Levy    | 2016 | United States  | 1972-2013 | 1948-2010 | 208 | No  |             |                 | Meteorological<br>Extreme weather | Infectious diseases                                                               | Temperature is associated with bacterial diarrhea and drought is associated with all-cause diarrhea, although few studies explored the association between drought and diarrhea. |
| 47 | Leyva   | 2017 | Asia           | 2009-2017 | NS        | 30  | No  |             | Elderly         | Meteorological                    | Infectious diseases<br>Mortality                                                  | Meteorological factors, extreme weather events (e.g. typhoon, floods) and air pollution are associated with                                                                      |

|    |            |      |               |           |           |    |     |       |  |                                   |                                                                                                                                     |                                                                                                                                                                                                                                                                                            |
|----|------------|------|---------------|-----------|-----------|----|-----|-------|--|-----------------------------------|-------------------------------------------------------------------------------------------------------------------------------------|--------------------------------------------------------------------------------------------------------------------------------------------------------------------------------------------------------------------------------------------------------------------------------------------|
|    |            |      |               |           |           |    |     |       |  | Extreme weather<br>Air quality    | Respiratory, cardiovascular and pulmonary, and neurological outcomes<br>Health systems<br>Mental health                             | mortality and morbidity, especially cardiovascular- and respiratory-specific. Higher temperature is associated with vector-borne diseases. Heat and cold temperatures are associated with hospital admissions. Flooding is associated with mental health outcomes (e.g. PTSD, depression). |
| 48 | Li         | 2018 | China         | 1988-2017 | NS        | 81 | No  | China |  | Meteorological<br>Extreme weather | Infectious diseases                                                                                                                 | Meteorological factors (temperature, precipitation, humidity, air pressure) and extreme weather events (floods, typhoons) are associated with Dengue fever in China.                                                                                                                       |
| 49 | Lian       | 2015 | China         | 2003-2014 | NS        | 20 | Yes |       |  | Meteorological                    | Mortality<br>Respiratory, cardiovascular and pulmonary, and neurological outcomes                                                   | Higher and lower temperatures are associated with stroke-related mortality and low temperatures are also associated with stroke-related morbidities.                                                                                                                                       |
| 50 | Liu        | 2015 | United States | 1990-2014 | NS        | 61 | No  |       |  | Air quality                       | Mortality<br>Respiratory, cardiovascular and pulmonary, and neurological outcomes<br>Health systems<br>Pregnancy and birth<br>Other | Wildfire smoke exposure is associated with mortality, respiratory outcomes and hospital admissions. Wildfire smoke exposure could also be associated with cardiovascular, ophthalmic and pregnancy outcomes, although more research is needed.                                             |
| 51 | Madaniyazi | 2015 | Australia     | 2004-2013 | 1961-2100 | 15 | No  |       |  | Air quality                       | Mortality                                                                                                                           | Air pollution is associated with future mortality.                                                                                                                                                                                                                                         |

|    |              |      |                |           |           |    |     |                             |                   |                                            |                                                                                                                                                   |                                                                                                                                                                                                                                                                                                                                                                                            |
|----|--------------|------|----------------|-----------|-----------|----|-----|-----------------------------|-------------------|--------------------------------------------|---------------------------------------------------------------------------------------------------------------------------------------------------|--------------------------------------------------------------------------------------------------------------------------------------------------------------------------------------------------------------------------------------------------------------------------------------------------------------------------------------------------------------------------------------------|
| 52 | Matysiak     | 2017 | Puerto Rico    | 2001-2005 | NS        | 26 | No  | Puerto Rico (United-States) |                   | Meteorological Extreme weather             | Infectious diseases                                                                                                                               | Meteorological factors (higher temperature and increased rainfall) are associated with vector-borne diseases, such as Dengue and Zika. Extreme weather events are less researched, but the few studies investigating this association suggest no association between hurricanes and floods and vector-borne diseases.                                                                      |
| 53 | Moghaddamnia | 2017 | Iran           | 2011-2016 | 1979-2013 | 26 | Yes |                             |                   | Meteorological                             | Mortality                                                                                                                                         | Higher and lower temperature are associated with cardiovascular mortality.                                                                                                                                                                                                                                                                                                                 |
| 54 | Naish        | 2014 | Australia      | NS        | 1931-2010 | 16 | No  |                             |                   | Meteorological                             | Infectious diseases                                                                                                                               | Meteorological factors (especially temperature, rainfall and humidity) are associated with Dengue.                                                                                                                                                                                                                                                                                         |
| 55 | Nichols      | 2009 | United Kingdom | 1999-2008 | NS        | 36 | No  |                             |                   | Meteorological Extreme weather Air quality | Infectious diseases Mortality Respiratory, cardiovascular and pulmonary, and neurological outcomes Mental health Dietary Skin and allergies Other | Meteorological factors (e.g., higher temperature) are associated with mortality and various infectious diseases. Increased UV exposure is associated with skin cancer and cataracts. Extreme weather events are associated with mortality, injury, mental health outcomes, malnutrition, and food- and water-borne diseases. Air pollution is associated with cardio-respiratory outcomes. |
| 56 | Odame        | 2018 | United States  | 2006-2017 | 1893-2013 | 14 | Yes |                             | Rural populations | Meteorological                             | Mortality                                                                                                                                         | Higher temperature is associated with all-cause mortality and cardiovascular specific mortality.                                                                                                                                                                                                                                                                                           |
| 57 | Park         | 2017 | Korea          | 1920-2015 | 1961-2013 | 10 | Yes |                             |                   | Meteorological                             | Other                                                                                                                                             | Higher temperature is associated with acute gouty arthritis.                                                                                                                                                                                                                                                                                                                               |
| 58 | Phalkey      | 2015 | Germany        | 1989-2012 | 1982-2008 | 15 | No  | Low to middle-income        | Children          | Meteorological                             | Dietary                                                                                                                                           | Meteorological factors (rainfall, temperature) and extreme weather                                                                                                                                                                                                                                                                                                                         |

|    |             |      |                  |               |               |    |     |                                             |                                    |                                          |                                                                                                                      |                                                                                                                                                                                                                                                |
|----|-------------|------|------------------|---------------|---------------|----|-----|---------------------------------------------|------------------------------------|------------------------------------------|----------------------------------------------------------------------------------------------------------------------|------------------------------------------------------------------------------------------------------------------------------------------------------------------------------------------------------------------------------------------------|
|    |             |      |                  |               |               |    |     | countri<br>es                               |                                    | Extreme<br>weather                       |                                                                                                                      | events are associated with childhood<br>undernutrition.                                                                                                                                                                                        |
| 59 | Philipsborn | 2016 | Georgi<br>a      | NS            | 1973-<br>2010 | 28 | Yes |                                             |                                    | Meteorolo<br>gical                       | Infectious<br>diseases                                                                                               | Higher temperature is associated with<br>Diarrheagenic Escherichia coli. No<br>significant relationship between<br>rainfall and E. coli.                                                                                                       |
| 60 | Phung       | 2015 | Australi<br>a    | 2004-<br>2013 | NS            | 13 | No  | Southe<br>ast Asia                          |                                    | Meteorolo<br>gical<br>Extreme<br>weather | Infectious<br>diseases                                                                                               | Meteorological factors (temperature,<br>humidity) and extreme weather events<br>(flooding) are associated with vector-<br>and water-borne infectious diseases.                                                                                 |
| 61 | Porpora     | 2019 | Italy            | 1964-<br>2019 | NS            | 78 | No  |                                             |                                    | Other                                    | Pregnancy and<br>birth                                                                                               | Environmental pollutants may be<br>associated with preterm birth,<br>however this association remains<br>unclear due to conflicting evidence.                                                                                                  |
| 62 | Poursafa    | 2015 | Iran             | 2001-<br>2013 | NS            | 15 | No  |                                             |                                    | Meteorolo<br>gical                       | Pregnancy and<br>birth                                                                                               | Meteorological factors (higher<br>temperature, lower temperature,<br>humidity, sunlight intensity) are<br>associated with adverse birth<br>outcomes (low birth weight, preterm<br>birth, hypertension, eclampsia).                             |
| 63 | Racloz      | 2012 | Australi<br>a    | NS            | NS            | 63 | No  |                                             |                                    | Meteorolo<br>gical                       | Infectious<br>diseases                                                                                               | Higher temperature, increased<br>precipitation and humidity are<br>associated with Dengue.                                                                                                                                                     |
| 64 | Rataj       | 2016 | Germa<br>ny      | 1981-<br>2012 | 1978-<br>2008 | 17 | No  | Low to<br>middle<br>income<br>countri<br>es |                                    | Extreme<br>weather                       | Mental health<br>Other                                                                                               | Extreme weather events are<br>associated with mental health<br>outcomes (e.g., PTSD, anxiety,<br>depression) and injuries.                                                                                                                     |
| 65 | Reid        | 2016 | United<br>States | 1990-<br>2015 | NS            | 53 | No  |                                             | Susceptibl<br>e<br>population<br>s | Air quality                              | Mortality<br>Respiratory,<br>cardiovascular<br>and<br>pulmonary,<br>and<br>neurological<br>outcomes<br>Mental health | Wildfire smoke exposure is associated<br>with respiratory outcomes (e.g.,<br>asthma) and mortality. Wildfire smoke<br>exposure may be associated with<br>cardiovascular, birth, and mental<br>health outcomes, but more research is<br>needed. |

|    |           |      |                |           |                         |     |    |                      |  |                                   |                                                                                                                           |                                                                                                                                                                                                                                                                                                       |
|----|-----------|------|----------------|-----------|-------------------------|-----|----|----------------------|--|-----------------------------------|---------------------------------------------------------------------------------------------------------------------------|-------------------------------------------------------------------------------------------------------------------------------------------------------------------------------------------------------------------------------------------------------------------------------------------------------|
|    |           |      |                |           |                         |     |    |                      |  |                                   | Pregnancy and birth                                                                                                       |                                                                                                                                                                                                                                                                                                       |
| 66 | Rifkin    | 2018 | United States  | 1995-2017 | 1992-2016               | 16  | No |                      |  | Meteorological<br>Extreme weather | Other                                                                                                                     | Temperature and extreme weather events (hurricanes) are associated with sleep quality.                                                                                                                                                                                                                |
| 67 | Salve     | 2018 | India          | NS        | NS                      | 11  | No | India                |  | Meteorological                    | Mortality<br>Health systems<br>Dietary                                                                                    | Increase in temperature is associated with all-cause mortality, cause-specific mortality (e.g., myocardial infarctions, stroke, heart diseases), hospitalizations (e.g., heat-related admissions, neonatal intensive unit admissions), and food insecurity and malnutrition, via agricultural issues. |
| 68 | Sanderson | 2017 | United Kingdom | 1988-2017 | 1900-2101               | 63  | No |                      |  | Meteorological                    | Mortality                                                                                                                 | Higher temperatures and heat waves are associated with mortality and heat-related mortality is likely to increase with increased temperatures.                                                                                                                                                        |
| 69 | Sawatzky  | 2018 | Canada         | 2005-2016 | NS                      | 85  | No | Arctic and Subarctic |  | General                           | Health systems                                                                                                            | Climate change, in general, is associated with a strain in public health resources, via population health issues and surveillance systems may guide future adaptation to climate change.                                                                                                              |
| 70 | Semenza   | 2012 | Sweden         | 1998-2009 | 1995-2007               | 722 | No |                      |  | Meteorological                    | Infectious diseases                                                                                                       | Meteorological factors (temperature, rainfall) are associated with some food- and water-borne diseases.                                                                                                                                                                                               |
| 71 | Stanke    | 2013 | United Kingdom | 1967-2011 | 1876-1879 and 1961-2010 | 87  | No |                      |  | Extreme weather                   | Infectious diseases<br>Mortality<br>Respiratory, cardiovascular and pulmonary, and neurological outcomes<br>Mental health | Droughts are associated with malnutrition, mortality, infectious diseases, cardiovascular and respiratory outcomes, mental health (e.g., increased worry, anxiety), injuries, and cancer.                                                                                                             |

|    |             |      |               |           |           |                                 |     |           |         |                                   |                                                                                                     |                                                                                                                                                                                                                                                                                                                                                                                     |
|----|-------------|------|---------------|-----------|-----------|---------------------------------|-----|-----------|---------|-----------------------------------|-----------------------------------------------------------------------------------------------------|-------------------------------------------------------------------------------------------------------------------------------------------------------------------------------------------------------------------------------------------------------------------------------------------------------------------------------------------------------------------------------------|
|    |             |      |               |           |           |                                 |     |           |         |                                   | Dietary<br>Other                                                                                    |                                                                                                                                                                                                                                                                                                                                                                                     |
| 72 | Stensgaard  | 2019 | Denmark       | 1995-2017 | NS        | 20                              | No  |           |         | Meteorological                    | Infectious diseases                                                                                 | Meteorological factors (temperature, precipitation, humidity) are associated with schistosomiasis and increasing temperatures are likely to affect the geographic range of this parasite.                                                                                                                                                                                           |
| 73 | Sun         | 2018 | China         | 1999-2017 | 1974-2014 | 30 (review)<br>23 meta-analysis | Yes |           |         | Meteorological                    | Mortality<br>Respiratory, cardiovascular and pulmonary, and neurological outcomes<br>Health systems | Heat and cold exposure are associated with myocardial infarctions (MI) and hospitalization for MI. Heat exposure is associated with MI-specific mortality.                                                                                                                                                                                                                          |
| 74 | Swynghedauw | 2009 | France        | NS        | NS        | NS                              | No  |           |         | Meteorological<br>Extreme weather | Infectious diseases<br>Mortality<br>Skin and allergies<br>Other                                     | Heat and cold exposure are associated with mortality and more specifically, respiratory- and cardiovascular-specific mortality. Exposure to UV is associated with skin cancer and cataracts. Higher temperatures are associated with infectious diseases (mosquito- and food-borne diseases) and extreme weather events are associated with undernutrition and food-borne diseases. |
| 75 | Tall        | 2014 | Australia     | 1946-2009 | 1886-2006 | 22                              | No  | Australia |         | Extreme weather                   | Infectious diseases                                                                                 | There is no strong evidence for the association between flooding and the Ross River Virus.                                                                                                                                                                                                                                                                                          |
| 76 | Varghese    | 2018 | Australia     | 1983-2017 | 1922-2017 | 26                              | No  |           | Workers | Meteorological                    | Occupational health and injuries                                                                    | Heat is associated with occupational injuries in many contexts of work (e.g., agriculture, transport, construction, fishing).                                                                                                                                                                                                                                                       |
| 77 | Veenema     | 2017 | United States | 2006-2016 | NS        | 47                              | No  |           |         | Extreme weather                   | Infectious diseases<br>Mortality                                                                    | Extreme water-related weather events are associated with mortality, water- and vector-borne infectious diseases,                                                                                                                                                                                                                                                                    |



|    |             |      |               |           |           |    |     |                    |                               |                         |                                                                                   |                                                                                                                                                                                                  |
|----|-------------|------|---------------|-----------|-----------|----|-----|--------------------|-------------------------------|-------------------------|-----------------------------------------------------------------------------------|--------------------------------------------------------------------------------------------------------------------------------------------------------------------------------------------------|
|    |             |      |               |           |           |    |     |                    |                               |                         | Mental health                                                                     | mental health issues (e.g., PTSD, depression, anxiety).                                                                                                                                          |
| 78 | Vilcins     | 2018 | Australia     | NS        | NS        | 72 | No  |                    | Children                      | Other                   | Dietary                                                                           | Certain environmental risk factors (e.g., sanitation, cooking fuels), which could be aggravated by climate change, may be associated with childhood stunting.                                    |
| 79 | Vins        | 2015 | United States | 1995-2005 | NS        | 82 | No  |                    |                               | Extreme weather         | Mental health                                                                     | Drought is likely associated with adverse mental health outcomes.                                                                                                                                |
| 80 | Waits       | 2018 | Finland       | 1970-2017 | NS        | 43 | No  | Arctic             |                               | Meteorological          | Infectious diseases                                                               | Meteorological factors (especially higher temperature and precipitation) are associated with infectious diseases (e.g. tick borne diseases, tularemia) in the Arctic.                            |
| 81 | Wald        | 2019 | United States | 2009-2018 | NS        | 17 | No  | United States      |                               | Meteorological          | Health systems                                                                    | Higher temperature is associated with emergency department (heat-related visits) visits and costs for healthcare systems.                                                                        |
| 82 | Welch       | 2019 | United States | NS        | NS        | 91 | No  |                    |                               | Meteorological          | Infectious diseases                                                               | Meteorological factors (temperature, precipitation) are associated with Salmonella.                                                                                                              |
| 83 | Wimalawansa | 2016 | United States | NS        | NS        | NS | No  | Tropical Countries | Workers                       | Meteorological<br>Other | Occupational health and injuries                                                  | Increasing temperatures and environmental pollution (e.g., heavy metals, fertilizers) are associated with occupational health outcomes, such as chronic kidney disease of multifactorial origin. |
| 84 | Witt        | 2015 | Germany       | NS        | NS        | 33 | Yes |                    | Chronic lung disease patients | Meteorological          | Mortality<br>Respiratory, cardiovascular and pulmonary, and neurological outcomes | Heat is associated with lung disease outcomes and mortality in patients with chronic lung diseases.                                                                                              |
| 85 | Xu          | 2018 | Australia     | 2004-2016 | 1978-2013 | 19 | No  |                    | Children                      | Meteorological          | Respiratory, cardiovascular                                                       | Heat and cold temperatures are associated with childhood asthma.                                                                                                                                 |

|    |          |      |           |           |           |    |     |  |          |                |                                                                                                                                                           |                                                                                                                                                                                                                                                                                                                                                                                          |
|----|----------|------|-----------|-----------|-----------|----|-----|--|----------|----------------|-----------------------------------------------------------------------------------------------------------------------------------------------------------|------------------------------------------------------------------------------------------------------------------------------------------------------------------------------------------------------------------------------------------------------------------------------------------------------------------------------------------------------------------------------------------|
|    |          |      |           |           |           |    |     |  |          |                | and pulmonary, and neurological outcomes                                                                                                                  |                                                                                                                                                                                                                                                                                                                                                                                          |
| 86 | Xu       | 2012 | Australia | 2000-2012 | 1983-2010 | 33 | No  |  | Children | Meteorological | Infectious diseases<br>Mortality<br>Respiratory, cardiovascular and pulmonary, and neurological outcomes<br>Health systems<br>Skin and allergies<br>Other | Heat and cold are associated with hospital admissions and mortality in children. Temperature is also associated with various infectious diseases (e.g., HFMD, malaria), respiratory diseases (e.g., asthma) and skin outcomes (e.g., eczema). For example, high temperature is associated with Hand Foot Mouth Disease and renal diseases and low temperature is associated with eczema. |
| 87 | Xu       | 2016 | Australia | 2001-2015 | NS        | 60 | Yes |  |          | Meteorological | Mortality                                                                                                                                                 | Heat waves are associated with mortality and it seems that the intensity of heatwaves is particularly important compared to length of heatwave.                                                                                                                                                                                                                                          |
| 88 | Xu       | 2014 | Australia | 1998-2012 | 1983-2009 | 12 | No  |  | Children | Meteorological | Mortality<br>Respiratory, cardiovascular and pulmonary, and neurological outcomes<br>Health systems<br>Other                                              | Heat waves are associated with hospital admissions, respiratory diseases, renal diseases, fever and electrolyte imbalances. Evidence concerning the association between heatwaves and children mortality is inconsistent.                                                                                                                                                                |
| 89 | Youssouf | 2014 | France    | 1990-2011 | 1987-2008 | 94 | No  |  |          | Air quality    | Mortality                                                                                                                                                 | Wildfire smoke exposure is associated with mortality, respiratory and                                                                                                                                                                                                                                                                                                                    |

1  
2  
3  
4  
5  
6  
7  
8  
9  
10  
11  
12  
13  
14  
15  
16  
17  
18  
19  
20  
21  
22  
23  
24  
25  
26  
27  
28  
29  
30  
31  
32  
33  
34  
35  
36  
37  
38  
39  
40  
41  
42  
43  
44  
45  
46  
47

|    |       |      |           |           |                        |     |     |  |                          |                |                                                                                                               |                                                                                                                                                                                                                                                                                                                   |
|----|-------|------|-----------|-----------|------------------------|-----|-----|--|--------------------------|----------------|---------------------------------------------------------------------------------------------------------------|-------------------------------------------------------------------------------------------------------------------------------------------------------------------------------------------------------------------------------------------------------------------------------------------------------------------|
|    |       |      |           |           |                        |     |     |  |                          |                | Respiratory, cardiovascular and pulmonary, and neurological outcomes<br>Health systems<br>Pregnancy and birth | cardiovascular outcomes, hospital admissions. Wildfire smoke exposure may also be associated with adverse birth outcomes (low birth weight).                                                                                                                                                                      |
| 90 | Yu    | 2015 | Australia | 1998-2012 | 1961-1990 et 2020-2100 | 20  | No  |  |                          | Meteorological | Infectious diseases                                                                                           | Meteorological factors (temperature, rainfall, humidity) may be associated with future malaria transmission, although findings are inconsistent, partly according to geographical focus.                                                                                                                          |
| 91 | Yu    | 2012 | Australia | 1997-2008 | 1973-2006              | 15  | Yes |  | Elderly                  | Meteorological | Mortality                                                                                                     | Heat and cold temperatures are associated with mortality for the elderly, although heat-related associations seem stronger than cold-related associations.                                                                                                                                                        |
| 92 | Zhang | 2007 | Australia | NS        | NS                     | NS  | No  |  | People with disabilities | General        | Other                                                                                                         | Climate change, in general, may be associated with disability-adjusted life years (DALY), and the cost of DALY could be particularly important in low to middle income countries.                                                                                                                                 |
| 93 | Zhang | 2017 | China     | 1997-2016 | 1981-2012              | 36  | No  |  | Pregnant people          | Meteorological | Pregnancy and birth                                                                                           | High temperature is associated with adverse birth outcomes, such as preterm birth, low birth weight and stillbirth. Low temperature is also associated with some adverse birth outcomes, including preterm birth and low birth, although the evidence is stronger for high temperature than for low temperatures. |
| 94 | Zuo   | 2015 | Australia | NS        | NS                     | 173 | No  |  |                          | Meteorological | Mortality<br>Respiratory, cardiovascular                                                                      | Heat waves are associated with mortality, hospital admissions, sunburn, heat exhaustion,                                                                                                                                                                                                                          |

1  
2  
3  
4  
5  
6  
7  
8  
9  
10  
11  
12  
13  
14  
15  
16  
17  
18  
19  
20  
21  
22  
23  
24  
25  
26  
27  
28  
29  
30  
31  
32  
33  
34  
35  
36  
37  
38  
39  
40  
41  
42  
43  
44  
45  
46  
47

|  |  |  |  |  |  |  |  |  |  |  |  |                                                                                                                              |                                                                              |
|--|--|--|--|--|--|--|--|--|--|--|--|------------------------------------------------------------------------------------------------------------------------------|------------------------------------------------------------------------------|
|  |  |  |  |  |  |  |  |  |  |  |  | and<br>pulmonary,<br>and<br>neurological<br>outcomes<br>Health<br>systems<br>Mental health<br>Skin and<br>allergies<br>Other | cardiovascular outcomes (e.g., heart<br>attacks) and mental health outcomes. |
|--|--|--|--|--|--|--|--|--|--|--|--|------------------------------------------------------------------------------------------------------------------------------|------------------------------------------------------------------------------|

\*NS = non-specified

For peer review only

**Appendix 4.** Summary of quality assessment according to revised AMSTAR-2 items. (Y = yes, PY = partial yes, N = no, NA = non-applicable).

| First author | Year | AMSTAR-2 Items |    |   |    |    |   |    |    |    |    |    |    |    |    |    |    |    |
|--------------|------|----------------|----|---|----|----|---|----|----|----|----|----|----|----|----|----|----|----|
|              |      | 1              | 1b | 2 | 3  | 4  | 5 | 6  | 7  | 8  | 9  | 10 | 11 | 12 | 13 | 14 | 15 | 16 |
| Alderman     | 2012 | Y              | N  | N | PY | PY | N | N  | PY | PY | N  | N  | NA | NA | Y  | N  | NA | N  |
| Amegah       | 2016 | Y              | N  | N | Y  | PY | N | N  | PY | Y  | Y  | N  | NA | NA | Y  | Y  | NA | Y  |
| An           | 2018 | N              | Y  | N | N  | PY | Y | N  | Y  | N  | Y  | N  | NA | NA | Y  | N  | NA | Y  |
| Augustin     | 2008 | Y              | Y  | N | N  | PY | N | N  | PY | N  | PY | N  | NA | NA | Y  | N  | NA | Y  |
| Babaie       | 2018 | Y              | Y  | N | N  | PY | Y | N  | Y  | PY | N  | N  | NA | NA | N  | N  | NA | N  |
| Bai          | 2013 | Y              | Y  | N | PY | PY | N | N  | PY | PY | Y  | N  | NA | NA | Y  | N  | NA | Y  |
| Benevolenza  | 2019 | Y              | Y  | N | PY | N  | N | N  | Y  | PY | PY | N  | NA | NA | Y  | N  | NA | N  |
| Berhane      | 2016 | Y              | N  | Y | N  | N  | N | N  | N  | PY | PY | N  | NA | NA | Y  | N  | NA | N  |
| Bernhardt    | 2019 | Y              | N  | N | N  | N  | N | N  | PY | PY | PY | N  | NA | NA | PY | N  | NA | Y  |
| Binazzi      | 2019 | Y              | Y  | N | Y  | PY | Y | N  | Y  | Y  | Y  | N  | Y  | Y  | Y  | Y  | Y  | Y  |
| Bonafede     | 2016 | Y              | N  | N | PY | PY | Y | N  | Y  | Y  | Y  | N  | NA | NA | Y  | Y  | NA | Y  |
| Brown        | 2013 | Y              | Y  | N | PY | PY | N | N  | Y  | Y  | PY | N  | NA | NA | Y  | Y  | NA | Y  |
| Bunker       | 2016 | Y              | Y  | N | Y  | N  | Y | PY | Y  | Y  | PY | N  | Y  | Y  | Y  | Y  | Y  | Y  |
| Campbell     | 2018 | Y              | N  | N | N  | PY | N | N  | Y  | PY | N  | N  | NA | NA | Y  | PY | NA | Y  |
| Cann         | 2013 | Y              | Y  | Y | PY | PY | N | N  | Y  | PY | PY | N  | NA | NA | Y  | Y  | NA | Y  |
| Carolan-Olah | 2014 | Y              | Y  | N | N  | PY | N | N  | Y  | PY | Y  | N  | NA | NA | PY | PY | NA | N  |
| Cheng        | 2014 | Y              | N  | N | PY | PY | N | N  | Y  | Y  | Y  | N  | NA | NA | Y  | PY | NA | N  |
| Coates       | 2019 | N              | N  | N | N  | N  | N | N  | PY | PY | Y  | N  | NA | NA | Y  | PY | NA | N  |
| Cong         | 2017 | N              | Y  | N | N  | PY | N | Y  | Y  | Y  | Y  | N  | Y  | N  | Y  | Y  | Y  | Y  |
| Cunrui       | 2011 | Y              | N  | N | PY | PY | N | N  | Y  | PY | N  | N  | NA | NA | Y  | N  | NA | Y  |
| deSousa      | 2018 | Y              | N  | N | PY | PY | N | N  | Y  | N  | N  | N  | NA | NA | Y  | N  | NA | Y  |
| Dhimal       | 2015 | Y              | Y  | N | PY | PY | N | N  | Y  | Y  | N  | N  | NA | NA | N  | N  | NA | N  |
| Doocy        | 2013 | Y              | N  | N | N  | PY | Y | N  | Y  | Y  | N  | N  | NA | NA | Y  | PY | NA | Y  |
| Duan         | 2019 | Y              | N  | N | N  | PY | N | N  | Y  | PY | Y  | N  | Y  | Y  | Y  | Y  | Y  | Y  |
| Fan          | 2015 | N              | Y  | N | N  | PY | Y | Y  | PY | PY | Y  | N  | Y  | Y  | Y  | Y  | Y  | Y  |
| Fernandez    | 2015 | Y              | Y  | N | PY | PY | Y | N  | Y  | PY | PY | N  | NA | NA | Y  | N  | NA | N  |
| Flouris      | 2018 | Y              | N  | Y | PY | PY | Y | Y  | Y  | Y  | Y  | Y  | Y  | Y  | Y  | Y  | Y  | Y  |

|             |      |   |   |   |    |    |   |    |    |    |    |   |    |    |   |    |    |   |
|-------------|------|---|---|---|----|----|---|----|----|----|----|---|----|----|---|----|----|---|
| Gao         | 2019 | N | Y | N | PY | PY | Y | N  | Y  | Y  | Y  | N | Y  | Y  | Y | Y  | Y  | Y |
| Gao         | 2014 | Y | N | N | PY | PY | N | PY | Y  | Y  | Y  | N | NA | NA | Y | Y  | NA | Y |
| Ghanizadeh  | 2017 | N | Y | N | PY | N  | Y | PY | Y  | PY | Y  | N | NA | NA | N | N  | NA | Y |
| Ghazani     | 2018 | N | N | N | N  | PY | Y | N  | Y  | Y  | PY | N | NA | NA | Y | PY | NA | Y |
| Gracia      | 2015 | Y | Y | N | PY | PY | Y | N  | Y  | PY | Y  | N | NA | NA | Y | N  | NA | Y |
| Hajat       | 2010 | Y | N | N | Y  | PY | N | N  | Y  | PY | N  | N | NA | NA | N | PY | NA | Y |
| Hedlund     | 2014 | Y | N | N | PY | N  | Y | Y  | Y  | PY | Y  | N | NA | NA | Y | N  | NA | Y |
| Hii         | 2016 | Y | N | N | PY | PY | N | N  | PY | PY | N  | N | NA | NA | N | N  | NA | Y |
| Huang       | 2016 | N | N | N | N  | PY | Y | N  | PY | Y  | Y  | N | Y  | Y  | Y | PY | N  | Y |
| Kampe       | 2016 | Y | N | N | PY | PY | Y | N  | Y  | Y  | PY | N | NA | NA | Y | N  | NA | Y |
| Khader      | 2015 | Y | N | N | PY | PY | Y | N  | Y  | Y  | N  | N | NA | NA | Y | PY | NA | Y |
| Klinger     | 2014 | N | N | N | N  | PY | Y | N  | Y  | N  | Y  | N | NA | NA | Y | N  | NA | Y |
| Kuehn       | 2017 | Y | N | N | N  | PY | N | N  | Y  | Y  | PY | N | NA | NA | Y | N  | NA | Y |
| Lake        | 2017 | Y | Y | N | N  | PY | Y | Y  | PY | PY | N  | N | NA | NA | N | N  | NA | Y |
| Lal         | 2019 | Y | N | Y | N  | PY | N | Y  | Y  | PY | Y  | N | Y  | Y  | Y | Y  | N  | Y |
| Lal         | 2015 | Y | Y | N | N  | PY | N | N  | Y  | PY | PY | N | NA | NA | Y | PY | NA | Y |
| Lawton      | 2019 | Y | N | N | PY | PY | N | N  | Y  | Y  | N  | N | NA | NA | Y | N  | NA | Y |
| Levi        | 2018 | Y | Y | N | PY | PY | Y | N  | Y  | Y  | N  | N | NA | NA | Y | PY | NA | Y |
| Levy        | 2016 | N | N | N | PY | PY | Y | PY | Y  | Y  | Y  | N | NA | NA | Y | Y  | NA | Y |
| Leyva       | 2017 | Y | Y | N | PY | PY | N | N  | Y  | N  | Y  | N | NA | NA | Y | N  | NA | N |
| Li          | 2018 | Y | N | N | N  | PY | N | N  | N  | PY | N  | N | NA | NA | N | N  | NA | Y |
| Lian        | 2015 | Y | N | N | PY | PY | Y | Y  | Y  | N  | Y  | N | Y  | Y  | Y | Y  | Y  | Y |
| Liu         | 2015 | Y | Y | N | Y  | PY | N | N  | Y  | Y  | PY | N | NA | NA | Y | PY | NA | Y |
| Madaniyazi  | 2015 | N | N | N | PY | PY | N | N  | Y  | PY | N  | N | NA | NA | Y | N  | NA | Y |
| Matysiak    | 2017 | Y | Y | N | PY | PY | N | N  | Y  | PY | Y  | N | NA | NA | Y | N  | NA | Y |
| Moghadamnia | 2017 | Y | N | N | PY | PY | Y | N  | Y  | Y  | Y  | N | Y  | N  | Y | Y  | N  | Y |
| Naish       | 2014 | Y | Y | N | PY | PY | N | N  | PY | PY | PY | N | NA | NA | Y | N  | NA | Y |
| Nichols     | 2009 | Y | N | N | PY | PY | Y | Y  | Y  | Y  | N  | N | NA | NA | N | N  | NA | Y |
| Odame       | 2018 | Y | N | N | PY | PY | N | N  | PY | PY | N  | N | Y  | N  | Y | Y  | Y  | Y |
| Park        | 2017 | Y | N | N | N  | PY | Y | Y  | N  | PY | Y  | N | Y  | PY | Y | Y  | N  | Y |
| Phalkey     | 2015 | Y | Y | N | PY | PY | Y | Y  | Y  | PY | PY | N | NA | NA | Y | N  | NA | Y |

|             |      |   |   |   |    |    |   |   |    |    |    |   |    |    |   |    |    |   |
|-------------|------|---|---|---|----|----|---|---|----|----|----|---|----|----|---|----|----|---|
| Philipsborn | 2016 | Y | Y | N | PY | N  | N | N | Y  | PY | N  | N | Y  | Y  | N | Y  | N  | Y |
| Phung       | 2015 | Y | Y | N | N  | PY | N | N | Y  | Y  | PY | Y | NA | NA | N | N  | NA | Y |
| Porpora     | 2019 | Y | Y | Y | PY | PY | N | N | Y  | PY | N  | N | NA | NA | N | Y  | NA | Y |
| Poursafa    | 2015 | Y | N | N | PY | PY | Y | Y | PY | Y  | PY | N | NA | NA | Y | Y  | NA | Y |
| Racloz      | 2012 | Y | N | N | N  | PY | N | N | N  | PY | N  | N | NA | NA | Y | Y  | NA | Y |
| Rataj       | 2016 | Y | Y | Y | PY | PY | Y | Y | PY | PY | Y  | N | NA | NA | Y | Y  | NA | Y |
| Reid        | 2016 | Y | N | N | PY | PY | N | N | N  | PY | PY | N | NA | NA | Y | PY | NA | Y |
| Rifkin      | 2018 | Y | Y | Y | PY | PY | Y | Y | Y  | PY | N  | N | NA | NA | Y | N  | NA | Y |
| Salve       | 2018 | Y | Y | N | N  | PY | Y | Y | PY | PY | N  | N | NA | NA | Y | N  | NA | Y |
| Sanderson   | 2017 | Y | Y | N | N  | PY | Y | N | Y  | PY | PY | N | NA | NA | Y | N  | NA | Y |
| Sawatzky    | 2018 | Y | Y | N | N  | PY | Y | N | Y  | N  | N  | N | NA | NA | N | N  | NA | Y |
| Semenza     | 2012 | N | N | N | N  | N  | N | N | N  | N  | Y  | N | NA | NA | N | N  | NA | N |
| Stanke      | 2013 | Y | N | N | PY | PY | N | N | Y  | PY | N  | N | NA | NA | Y | N  | NA | Y |
| Stensgaard  | 2019 | Y | Y | N | N  | PY | N | Y | N  | PY | N  | N | NA | NA | N | N  | NA | Y |
| Sun         | 2018 | Y | Y | N | PY | PY | N | Y | Y  | Y  | Y  | N | Y  | Y  | Y | Y  | Y  | Y |
| Swynghedauw | 2009 | Y | Y | N | N  | N  | N | N | N  | N  | N  | N | NA | NA | N | N  | NA | Y |
| Tall        | 2014 | Y | N | N | N  | PY | N | N | Y  | Y  | PY | N | NA | NA | Y | N  | NA | Y |
| Varghese    | 2018 | Y | N | N | N  | PY | N | N | Y  | Y  | N  | N | NA | NA | Y | N  | NA | Y |
| Veenema     | 2017 | Y | N | Y | N  | PY | N | N | Y  | N  | PY | N | NA | NA | N | N  | NA | N |
| Vilcins     | 2018 | Y | N | Y | N  | PY | N | N | Y  | N  | Y  | N | NA | NA | Y | N  | NA | Y |
| Vins        | 2015 | Y | Y | N | N  | PY | N | N | Y  | N  | N  | N | NA | NA | Y | PY | NA | Y |
| Waits       | 2018 | Y | Y | N | N  | PY | N | N | Y  | N  | N  | N | NA | NA | N | N  | NA | Y |
| Wald        | 2019 | Y | N | N | N  | PY | N | N | Y  | Y  | N  | N | NA | NA | Y | N  | NA | N |
| Welch       | 2019 | Y | Y | N | N  | N  | N | N | PY | PY | N  | N | NA | NA | N | N  | NA | N |
| Wimalawansa | 2016 | Y | N | N | N  | N  | N | N | N  | N  | N  | N | NA | NA | N | N  | NA | Y |
| Witt        | 2015 | Y | N | N | N  | PY | N | N | Y  | N  | N  | N | N  | Y  | Y | N  | N  | Y |
| Xu          | 2018 | Y | N | N | PY | PY | N | N | PY | PY | N  | N | NA | NA | Y | N  | NA | Y |
| Xu          | 2012 | Y | N | N | PY | PY | N | N | PY | Y  | PY | N | NA | NA | N | N  | NA | Y |
| Xu          | 2016 | Y | N | N | PY | PY | N | N | Y  | Y  | N  | N | Y  | N  | Y | Y  | N  | Y |
| Xu          | 2014 | Y | Y | N | N  | PY | N | N | Y  | Y  | N  | N | NA | NA | N | Y  | NA | N |
| Youssef     | 2014 | Y | Y | N | PY | PY | N | N | Y  | Y  | N  | N | NA | NA | Y | N  | NA | Y |

|       |                        |    |    |    |    |    |    |    |    |    |    |    |    |    |    |    |    |    |
|-------|------------------------|----|----|----|----|----|----|----|----|----|----|----|----|----|----|----|----|----|
| Yu    | 2015                   | N  | N  | N  | PY | PY | N  | N  | Y  | Y  | N  | N  | NA | NA | Y  | PY | NA | Y  |
| Yu    | 2012                   | Y  | Y  | N  | PY | N  | N  | Y  | Y  | Y  | N  | N  | Y  | N  | Y  | Y  | Y  | Y  |
| Zhang | 2007                   | Y  | N  | N  | N  | N  | N  | N  | N  | N  | N  | N  | NA | NA | Y  | N  | NA | N  |
| Zhang | 2017                   | Y  | Y  | N  | PY | PY | N  | N  | PY | Y  | Y  | N  | NA | NA | Y  | Y  | NA | Y  |
| Zuo   | 2015                   | Y  | Y  | N  | N  | PY | N  | N  | N  | N  | N  | N  | NA | NA | N  | N  | NA | Y  |
| TOTAL | Yes                    | 81 | 44 | 9  | 5  | 0  | 32 | 17 | 64 | 36 | 31 | 2  | 17 | 12 | 70 | 28 | 11 | 78 |
|       | Partial<br>Yes         | 0  | 0  | 0  | 47 | 80 | 0  | 4  | 19 | 41 | 22 | 0  | 0  | 1  | 2  | 15 | 0  | 0  |
|       | No                     | 13 | 50 | 85 | 42 | 14 | 62 | 73 | 11 | 17 | 41 | 92 | 1  | 5  | 22 | 51 | 7  | 16 |
|       | Not-<br>Applic<br>able | 0  | 0  | 0  | 0  | 0  | 0  | 0  | 0  | 0  | 0  | 0  | 0  | 76 | 76 | 0  | 0  | 76 |



**Appendix 5.** Summary table of publications according to climate impact and health outcome according to frequencies and references. References with a \* explore only this specific combination of climate impact and health outcome and therefore appear only once in this table. Number of studies and references (according to alphabetical order) for each combination of categories are presented in the cells. Empty cells in this Table indicate an absence of studies at this combination of categories.

| Health Outcome                                                       | Climate Impact                                                                                                                                                                                                                                                                                                                              |                                                                                                                                           |                                                                    |             |           |
|----------------------------------------------------------------------|---------------------------------------------------------------------------------------------------------------------------------------------------------------------------------------------------------------------------------------------------------------------------------------------------------------------------------------------|-------------------------------------------------------------------------------------------------------------------------------------------|--------------------------------------------------------------------|-------------|-----------|
|                                                                      | Meteorological (71)                                                                                                                                                                                                                                                                                                                         | Extreme weather (24)                                                                                                                      | Air quality (7)                                                    | General (5) | Other (3) |
| Infectious diseases (41)                                             | <p><b>35</b></p> <p>Amegah, Babaie*, Bai*, Berhane, Bernhardt*, Cheng, Coates*, de Sousa, Dhimal*, Duan*, Fan*, Gao 2014, Ghazani*, Gracia*, Hedlund, Hii*, Khader, Lal 2015*, Lal 2019*, Levy, Leyva, Li, Matysiak, Naish*, Nichols, Philipsborn*, Phung, Racloz*, Semenza*, Stensgaard, Swynghedau, Waits*, Welch*, Xu 2012, Yu 2015*</p> | <p><b>14</b></p> <p>Alderman, Berhane, Brown*, Cann*, Hedlund, Levy, Li, Matysiak, Nichols, Phung, Stanke, Swynghedau, Tall*, Veenema</p> |                                                                    |             |           |
| Mortality (32)                                                       | <p><b>24</b></p> <p>Amegah, Bunker, Campbell, Cheng, Cunrui*, Ghanizadeh, Hajat*, Khader, Lawton, Leyva, Lian, Moghdamnia*, Nichols, Odame*, Salve, Sanderson*, Sun, Swynghedauw, Witt, Xu 2012, Xu 2014, Xu 2016*, Yu 2012*, Zuo</p>                                                                                                       | <p><b>5</b></p> <p>Alderman, Doocy, Leyva, Stanke, Veenema</p>                                                                            | <p><b>5</b></p> <p>Leyva, Liu, Madniyazi*, Reid, Youssouf</p>      |             |           |
| Respiratory, cardio-vascular, cardio-pulmonary and neurological (22) | <p><b>17</b></p> <p>Amegah, Bunker, Cheng, Cong*, de Sousa, Gao 2014, Ghanizadeh, Lawton, Leyva, Lian, Nichols, Sun, Witt, Xu 2012, Xu 2014, Xu 2018*, Zuo</p>                                                                                                                                                                              | <p><b>1</b></p> <p>Stanke</p>                                                                                                             | <p><b>6</b></p> <p>Khader, Leyva, Liu, Nichols, Reid, Youssouf</p> |             |           |

|                                                                      |                                      |                                                                                                |                                                                                              |                                 |                           |                        |
|----------------------------------------------------------------------|--------------------------------------|------------------------------------------------------------------------------------------------|----------------------------------------------------------------------------------------------|---------------------------------|---------------------------|------------------------|
| 1<br>2<br>3<br>4<br>5<br>6<br>7                                      | Health systems (16)                  | <b>11</b><br>Amegah, Campbell, Cheng, Khader, Leyva, Salve, Sun, Wald*, Xu 2012, Xu 2014, Zuo  | <b>2</b><br>Alderman, Klinger*                                                               | <b>2</b><br>Liu, Youssouf       | <b>1</b><br>Sawatzky*     |                        |
| 8<br>9<br>10<br>11<br>12<br>13                                       | Mental Health (13)                   | <b>3</b><br>Gao 2019*, Khader, Zuo                                                             | <b>9</b><br>Alderman, Benevolenza, Fernandez*, Leyva, Nichols, Rataj, Stanke, Veenema, Vins* | <b>1</b><br>Reid                |                           |                        |
| 14<br>15<br>16<br>17<br>18<br>19                                     | Pregnancy and birth outcomes (11)    | <b>5</b><br>Carolan-Olah*, Kuehn*, Poursafa*, Khader, Zhang 2017*                              | <b>2</b><br>Alderman, Benevolenza                                                            | <b>3</b><br>Liu, Reid, Youssouf |                           | <b>1</b><br>Porpora*   |
| 20<br>21<br>22<br>23<br>24                                           | Dietary (9)                          | <b>4</b><br>Amegah, Khader, Phalkey, Salve                                                     | <b>6</b><br>Berhane, Khader, Nichols, Phalkey, Stanke, Swynghedauw                           |                                 | <b>1</b><br>An*           | <b>1</b><br>Vilcins*   |
| 25<br>26<br>27<br>28<br>29                                           | Skin and allergies (9)               | <b>7</b><br>Amegah, Augustin*, Nichols, Gao 2014, Swynghedauw, Xu 2012, Zuo                    |                                                                                              |                                 | <b>2</b><br>Huang*, Lake* |                        |
| 30<br>31<br>32<br>33<br>34<br>35                                     | Occupational health and injuries (6) | <b>6</b><br>Binazzi*, Bonafede*, Flouris*, Levi*, Varghese*, Wimalawans                        |                                                                                              |                                 |                           | <b>1</b><br>Wimalawans |
| 36<br>37<br>38<br>39<br>40<br>41<br>42<br>43<br>44<br>45<br>46<br>47 | Other (17)                           | <b>10</b><br>Bunker, Cheng, Kampe*, Nichols, Park*, Rifkin, Swynghedauw, Xu 2012, Xu 2014, Zuo | <b>6</b><br>Alderman, Benevolenza, Doocy, Rataj, Rifkin, Stanke                              | <b>1</b><br>Liu                 | <b>1</b><br>Zhang 2007*   |                        |

# BMJ Open

## The Health Effects of Climate Change: An Overview of Systematic Reviews

|                                 |                                                                                                                                                                                                                                                                                                                                                                                                                                                                                                                                                                                                                                                                                                                                             |
|---------------------------------|---------------------------------------------------------------------------------------------------------------------------------------------------------------------------------------------------------------------------------------------------------------------------------------------------------------------------------------------------------------------------------------------------------------------------------------------------------------------------------------------------------------------------------------------------------------------------------------------------------------------------------------------------------------------------------------------------------------------------------------------|
| Journal:                        | <i>BMJ Open</i>                                                                                                                                                                                                                                                                                                                                                                                                                                                                                                                                                                                                                                                                                                                             |
| Manuscript ID                   | bmjopen-2020-046333.R1                                                                                                                                                                                                                                                                                                                                                                                                                                                                                                                                                                                                                                                                                                                      |
| Article Type:                   | Original research                                                                                                                                                                                                                                                                                                                                                                                                                                                                                                                                                                                                                                                                                                                           |
| Date Submitted by the Author:   | 06-Mar-2021                                                                                                                                                                                                                                                                                                                                                                                                                                                                                                                                                                                                                                                                                                                                 |
| Complete List of Authors:       | Rocque, Rhea; The University of Winnipeg<br>Beaudoin, Caroline; Université Laval, Faculty of Medicine<br>Ndjaboue, Ruth; Université Laval, Faculty of Medicine; VITAM Research Centre for Sustainable Health<br>Cameron, Laura; The University of Winnipeg<br>Poirier-Bergeron, Louann; Université Laval, Faculty of Medicine<br>Poulin-Rheault, Rose-Alice; Université Laval, Faculty of Medicine<br>Fallon, Catherine; Université Laval, Faculty of Medicine; CHUQ Research Centre<br>Tricco, Andrea; Li Ka Shing Knowledge Institute, ; University of Toronto, Institute for Health Policy, Management, and Evaluation<br>Witteman, Holly; Laval University, Family and Emergency Medicine; VITAM Research Centre for Sustainable Health |
| <b>Primary Subject Heading</b>: | Public health                                                                                                                                                                                                                                                                                                                                                                                                                                                                                                                                                                                                                                                                                                                               |
| Secondary Subject Heading:      | Public health, Global health                                                                                                                                                                                                                                                                                                                                                                                                                                                                                                                                                                                                                                                                                                                |
| Keywords:                       | PUBLIC HEALTH, SOCIAL MEDICINE, Public health < INFECTIOUS DISEASES                                                                                                                                                                                                                                                                                                                                                                                                                                                                                                                                                                                                                                                                         |
|                                 |                                                                                                                                                                                                                                                                                                                                                                                                                                                                                                                                                                                                                                                                                                                                             |

SCHOLARONE™  
Manuscripts

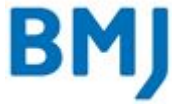

I, the Submitting Author has the right to grant and does grant on behalf of all authors of the Work (as defined in the below author licence), an exclusive licence and/or a non-exclusive licence for contributions from authors who are: i) UK Crown employees; ii) where BMJ has agreed a CC-BY licence shall apply, and/or iii) in accordance with the terms applicable for US Federal Government officers or employees acting as part of their official duties; on a worldwide, perpetual, irrevocable, royalty-free basis to BMJ Publishing Group Ltd ("BMJ") its licensees and where the relevant Journal is co-owned by BMJ to the co-owners of the Journal, to publish the Work in this journal and any other BMJ products and to exploit all rights, as set out in our [licence](#).

The Submitting Author accepts and understands that any supply made under these terms is made by BMJ to the Submitting Author unless you are acting as an employee on behalf of your employer or a postgraduate student of an affiliated institution which is paying any applicable article publishing charge ("APC") for Open Access articles. Where the Submitting Author wishes to make the Work available on an Open Access basis (and intends to pay the relevant APC), the terms of reuse of such Open Access shall be governed by a Creative Commons licence – details of these licences and which [Creative Commons](#) licence will apply to this Work are set out in our licence referred to above.

Other than as permitted in any relevant BMJ Author's Self Archiving Policies, I confirm this Work has not been accepted for publication elsewhere, is not being considered for publication elsewhere and does not duplicate material already published. I confirm all authors consent to publication of this Work and authorise the granting of this licence.

# The Health Effects of Climate Change: An Overview of Systematic Reviews

Rh ea Rocque, PhD<sup>1</sup>, Caroline Beaudoin, DEC<sup>2</sup>, Ruth Ndjaboue, MPH, PhD<sup>2,3</sup>, Laura Cameron, MA<sup>1</sup>, Louann Poirier Bergeron, DES<sup>2</sup>, Rose-Alice Poulin-Rheault, DEC<sup>2</sup>, Catherine S. Fallon, MSc<sup>2,4</sup>, Andrea C. Tricco, PhD<sup>5,6</sup>, Holly O. Witteman, PhD<sup>2,3,4</sup>

<sup>1</sup>Prairie Climate Centre, University of Winnipeg, Winnipeg

<sup>2</sup>Faculty of Medicine, Laval University, Quebec City

<sup>3</sup>VITAM Research Centre for Sustainable Health, Quebec City

<sup>4</sup>Research Centre of the CHU de Qu ebec-Laval University, Quebec City

<sup>5</sup>Li Ka Shing Knowledge Institute, Unity Health Toronto, Toronto

<sup>6</sup>Dalla Lana School of Public Health, University of Toronto, Toronto

## Corresponding author:

Rh ea Rocque - rhea.rocque@gmail.com

Prairie Climate Centre

University of Winnipeg

515 Portage Avenue

Winnipeg, Manitoba, Canada R3B 2E9

Phone number: 1.204.786.7811

Fax number: 1.204.783.4996

## Abstract

**Objectives:** We aimed to develop a systematic synthesis of systematic reviews of health impacts of climate change, by synthesizing studies' characteristics, climate impacts, health outcomes, and key findings.

**Design:** We conducted an overview of systematic reviews of health impacts of climate change. We registered our review in PROSPERO (CRD42019145972). No ethical approval was required since we used secondary data. Additional data is not available.

**Data Sources:** On June 22, 2019, we searched Medline, CINAHL, Embase, Cochrane, and Web of Science.

**Eligibility Criteria:** We included systematic reviews that explored at least one health impact of climate change.

**Data Extraction and Synthesis:** We organized systematic reviews according to their key characteristics, including geographical regions, year of publication and authors' affiliations. We mapped the climate effects and health outcomes being studied and synthesized major findings. We used a modified version of AMSTAR-2 to assess the quality of studies.

1  
2  
3 38 Results: We included ninety-four systematic reviews. Most were published after 2015 and  
4 39 approximately one fifth contained meta-analyses. Reviews synthesized evidence about five  
5 40 categories of climate impacts; the two most common were meteorological and extreme weather  
6 41 events. Reviews covered ten health outcome categories; the three most common were 1)  
7 42 infectious diseases, 2) mortality, and 3) respiratory, cardiovascular, or neurological outcomes.  
8 43 Most reviews suggested a deleterious impact of climate change on multiple adverse health  
9 44 outcomes, although the majority also called for more research.

12 45 Conclusions: Most systematic reviews suggest that climate change is associated with worse  
13 46 human health. This study provides a comprehensive higher-order summary of research on  
14 47 health impacts of climate change. Study limitations include the date of the systematic search  
15 48 and that we did not assess for overlap. Future research could explore the potential explanations  
16 49 between these associations to propose adaptation and mitigation strategies and could include  
17 50 broader socio-psychological health impacts of climate change.

## 21 51 Keywords

22 52 Health; Climate Change; Overview of Systematic Reviews; Extreme Weather Events; Air  
23 53 Quality; Global Warming  
24 54

## 28 55 Strengths and limitations of this study

- 31 56
- 32 57 • A strength of this study is that it provides the first broad overview of previous systematic  
33 58 reviews exploring the health impacts of climate change. By targeting systematic reviews,  
34 59 we achieve a higher-order summary of findings than what would have been possible by  
35 60 consulting individual original studies.
  - 36 61 • By synthesizing findings across all included studies and according to the combination of  
37 62 climate impact and health outcome, we offer a clear, detailed, and unique summary of  
38 63 the current state of evidence and knowledge gaps about how climate change may  
39 64 influence human health.
  - 40 65 • A limitation of this study is that we were unable to access some full texts and therefore  
41 66 some studies were excluded, even though we deemed them potentially relevant after  
42 67 title and abstract inspection.
  - 43 68 • Another limitation is that we could not conduct meta-meta-analyses of findings across  
44 69 reviews, due to the heterogeneity of the included systematic reviews and the relatively  
45 70 small proportion of studies reporting meta-analytic findings.
  - 46 71 • Finally, the date of the systematic search is a limitation, as we conducted the search in  
47 72 June 2019.
- 48 71  
49  
50  
51

## 52 72 Introduction

53 73 The environmental consequences of climate change such as sea-level rise, increasing  
54 74 temperatures, more extreme weather events, increased droughts, flooding, and wildfires are

1  
2  
3 75 impacting human health and lives.<sup>1,2</sup> Previous studies and reviews have documented the  
4 76 multiple health impacts of climate change, including an increase in infectious diseases,  
5 77 respiratory disorders, heat-related morbidity and mortality, undernutrition due to food insecurity,  
6 78 and adverse health outcomes ensuing from increased socio-political tension and conflicts.<sup>2-5</sup>  
7 79 Indeed, the most recent Lancet Countdown report,<sup>2</sup> which investigates 43 indicators of the  
8 80 relationship between climate change and human health, arrived at their most worrisome findings  
9 81 since the beginning of their on-going annual work. This report underlines that the health impacts  
10 82 of climate change continue to worsen and are being felt on every continent, although they are  
11 83 having a disproportionate and unequal impact on populations.<sup>2</sup> Authors caution that these  
12 84 health impacts will continue to worsen unless we see an immediate international response to  
13 85 limiting climate change.  
14 86

15 87 To guide future research and action to mitigate and adapt to the health impacts of climate  
16 88 change and its environmental consequences, we need a complete and thorough overview of the  
17 89 research already conducted regarding the health impacts of climate change. Although the  
18 90 number of original studies researching the health impacts of climate change has greatly  
19 91 increased in the recent decade,<sup>2</sup> these do not allow for an in-depth overview of the current  
20 92 literature on the topic. Systematic reviews, on the other hand, allow a higher-order overview of  
21 93 the literature. Although previous systematic reviews have been conducted on the health impacts  
22 94 of climate change, these tend to focus on specific climate effects (e.g., impact of wildfires on  
23 95 health),<sup>6,7</sup> health impacts (e.g., occupational health outcomes),<sup>8,9</sup> countries,<sup>10-12</sup> or are no longer  
24 96 up to date,<sup>13,14</sup> thus limiting our global understanding of what is currently known about the  
25 97 multiple health impacts of climate change across the world.  
26 98

27 99 In this study, we aimed to develop such a complete overview by synthesizing systematic  
28 100 reviews of health impacts of climate change. This higher-order overview of the literature will  
29 101 allow us to better prepare for the worsening health impacts of climate change, by identifying and  
30 102 describing the diversity and range of health impacts studied, as well as by identifying gaps in  
31 103 previous research. Our research objectives were to synthesize studies' characteristics such as  
32 104 geographical regions, years of publication, and authors' affiliations, to map the climate impacts,  
33 105 health outcomes, and combinations of these that have been studied, and to synthesize key  
34 106 findings.  
35

## 36 107 **Methods**

37 108 We applied the Cochrane method for overviews of reviews.<sup>15</sup> This method is designed to  
38 109 systematically map the themes of studies on a topic and synthesize findings to achieve a  
39 110 broader overview of the available literature on the topic.  
40

## 41 111 **Research questions**

42 112 Our research questions were the following: 1) What is known about the relationship between  
43 113 climate change and health, as shown in previous systematic reviews? 2) What are the  
44 114 characteristics of these studies? We registered our plan (CRD42019145972<sup>16</sup>) in PROSPERO,  
45  
46  
47  
48  
49  
50

1  
2  
3 115 an international prospective register of systematic reviews and followed PRISMA 2020<sup>17</sup> to  
4 116 report our findings, as a reporting guideline for overviews is still in development.<sup>18</sup>  
5  
6

## 7 117 Search strategy and selection criteria

8  
9 118 To identify relevant studies, we used a systematic search strategy. There were two inclusion  
10 119 criteria. We included studies in this review if they 1) were systematic reviews of original  
11 120 research and 2) reported at least one health impact as it related (directly or indirectly) to climate  
12 121 change.  
13

14 122  
15 123 We defined a systematic review, based on Cochrane's definition, as a review of the literature in  
16 124 which one "attempts to identify, appraise and synthesize all the empirical evidence that meets  
17 125 pre-specified eligibility criteria to answer a specific research question [by] us[ing] explicit,  
18 126 systematic methods that are selected with a view aimed at minimizing bias, to produce more  
19 127 reliable findings to inform decision making."<sup>19</sup> We included systematic reviews of original  
20 128 research, with or without meta-analyses. We excluded narrative reviews, non-systematic  
21 129 literature reviews and systematic reviews of materials that were not original research (e.g.,  
22 130 systematic reviews of guidelines.)  
23

24 131  
25 132 We based our definition of health impacts on the World Health Organization's (WHO) definition  
26 133 of health as, "a state of complete physical, mental and social well-being and not merely the  
27 134 absence of disease or infirmity."<sup>20</sup> Therefore, health impacts included, among others, morbidity,  
28 135 mortality, new conditions, worsening/improving conditions, injuries, and psychological well-  
29 136 being. Included studies could refer to climate change or global warming directly or indirectly, for  
30 137 instance, by synthesizing the direct or indirect health effects of temperature rises or of natural  
31 138 conditions/disasters made more likely by climate change (e.g., floods, wildfires, temperature  
32 139 variability, droughts.) Although climate change and global warming are not equivalent terms, in  
33 140 an effort to avoid missing relevant literature, we included studies using either term. We included  
34 141 systematic reviews whose main focus was not the health impacts of climate change, providing  
35 142 they reported at least one result regarding health effects related to climate change (or  
36 143 consequences of climate change.) We excluded studies if they did not report at least one health  
37 144 effect of climate change. For instance, we excluded studies which reported on existing  
38 145 measures of health impacts of climate change (and not the health impact itself) and studies  
39 146 which reported on certain health impacts without a mention of climate change, global warming  
40 147 or environmental consequences made more likely by climate change.  
41

42 148  
43 149 On June 22, 2019, we retrieved systematic reviews regarding the health effects of climate  
44 150 change by searching from inception the electronic databases Medline, CINAHL, Embase,  
45 151 Cochrane, Web of Science using a structured search (see Appendix 1 for final search strategy  
46 152 developed by a librarian.) We did not apply language restrictions. After removing duplicates, we  
47 153 imported references into Covidence.<sup>21</sup>  
48  
49  
50  
51  
52  
53  
54  
55  
56  
57  
58  
59  
60



## 154 Screening process and data extraction

155 To select studies, two trained analysts first screened independently titles and abstracts to  
156 eliminate articles that did not meet our inclusion criteria. Next, the two analysts independently  
157 screened the full text of each article. A senior analyst resolved any conflict or disagreement.

158  
159 Next, we decided on key information that needed to be extracted from studies. We extracted the  
160 first author's name, year of publication, number of studies included, time frame (in years) of the  
161 studies included in the article, first author's institution's country affiliation, whether the  
162 systematic review included a meta-analysis, geographical focus, population focus, the climate  
163 impact(s) and the health outcome(s) as well as the main findings and limitations of each  
164 systematic review.

165  
166 Two or more trained analysts (RR, CB, RN, LC, LPB, RAPR) independently extracted data,  
167 using Covidence and spreadsheet software (Google Sheets). An additional trained analyst from  
168 the group or senior research team member resolved disagreements between individual  
169 judgments.

## 171 Coding and Data Mapping

172 To summarize findings from previous reviews, we first mapped articles according to climate  
173 impacts and health outcomes. To develop the categories of climate impacts and health  
174 outcomes, two researchers (RR and LC) consulted the titles and abstracts of each article. We  
175 started by identifying categories directly based on our data and finalized our categories by  
176 consulting previous conceptual frameworks of climate impacts and health outcomes.<sup>1,22,23</sup> The  
177 same two researchers independently coded each article according to their climate impact and  
178 health outcome. We then compared coding and resolved disagreements through discussion.

179  
180 Next, using spreadsheet software, we created a matrix to map articles according to their  
181 combination of climate impacts and health outcomes. Each health outcome occupied one row,  
182 whereas climate impacts each occupied one column. We placed each article in the matrix  
183 according to the combination(s) of their climate impact(s) and health outcome(s). For instance, if  
184 we coded an article as 'extreme weather' for climate and 'mental health' for health impact, we  
185 noted the reference of this article in the cell at the intersection of these two codes. We  
186 calculated frequencies for each cell to identify frequent combinations and gaps in literature.  
187 Because one study could investigate more than one climate impact and health outcome, the  
188 frequency counts for each category could exceed the number of studies included in this review.

189  
190 Finally, we re-read the Results and Discussion sections of each article to summarize findings of  
191 the studies. We first wrote an individual summary for each study, then we collated the  
192 summaries of all studies exploring the same combination of categories to develop an overall  
193 summary of findings for each combination of categories.

## 194 Quality assessment

195 We used a modified version of AMSTAR-2 to assess the quality of the included systematic  
196 reviews (Appendix 2). Since AMSTAR-2 was developed for syntheses of systematic reviews of  
197 randomized controlled trials, working with a team member with expertise in knowledge synthesis  
198 (AT), we adapted it to suit a research context that is not amenable to randomized controlled  
199 trials. For instance, we changed assessing and accounting for risk of bias in studies' included  
200 randomized controlled trials to assessing and accounting for limitations in studies' included  
201 articles. Complete modifications are presented in Appendix 2.

## 202 Patient and Public Involvement

203 Patients and members of the public were not involved in this study.

## 204 Results

### 205 Articles identified

206 As shown in the PRISMA diagram in Figure 1, from an initial set of 2619 references, we retained  
207 94 for inclusion. More precisely, following screening of titles and abstracts, 146 studies  
208 remained for full text inspection. During full text inspection, we excluded 52 studies, as they did  
209 not report a direct health effect of climate change (n = 17), did not relate to climate change (n =  
210 15), were not systematic reviews (n = 10), or we could not retrieve the full text (n = 10).

211  
212 **Insert Figure 1 About Here**

### 213 Study Descriptions

214 A detailed table of all articles and their characteristics can be found in Appendix 3. Publication  
215 years ranged from 2007 to 2019 (year of data extraction), with the great majority of included  
216 articles (n = 69; 73%) published since 2015 (Figure 2). A median of 30 studies had been  
217 included in the systematic reviews (mean = 60; SD = 49; range 7 to 722). Approximately one  
218 fifth of the systematic reviews included meta-analyses of their included studies (n = 18; 19%).  
219 The majority of included systematic reviews' first authors had affiliations in high-income  
220 countries, with the largest representations by continent in Europe (n = 30) and Australia (n = 24)  
221 (Figure 3).

222  
223 **Insert Figure 2 About Here**

224  
225 **Insert Figure 3 About Here**

226  
227 Regarding the geographical focus of systematic reviews, most of the included studies (n = 68;  
228 72%) had a global focus or no specified geographical limitations and therefore included studies  
229 published anywhere in the world. The remaining systematic reviews either targeted certain  
230 countries (n = 12) (1 for each Australia, Germany, Iran, India, Ethiopia, Malaysia, Nepal, New

231 Zealand and 2 reviews focused on China and the United States), continents (n = 5) (3 focused  
232 on Europe and 2 on Asia), or regions according to geographical location (n = 6) (1 focused on  
233 Sub-Saharan Africa, 1 on Eastern Mediterranean countries, 1 on Tropical countries, and 3  
234 focused on the Arctic), or according to the country's level of income (n = 3) (2 on low to middle  
235 income countries, 1 on high income countries).

236  
237 Regarding specific populations of interest, most of the systematic reviews did not define a  
238 specific population of interest (n = 69; 73%). For the studies that specified a population of  
239 interest (n = 25; 26.6%), the most frequent populations were children (n = 7) and workers (n =  
240 6), followed by vulnerable or susceptible populations more generally (n = 4), the elderly (n = 3),  
241 pregnant people (n = 2), people with disabilities or chronic illnesses (n = 2) and rural populations  
242 (n = 1).

## 243 Quality assessment

244 We assessed studies for quality according to our revised AMSTAR-2. The purpose of this  
245 assessment was to evaluate the quality of the included studies as a whole to get a sense of the  
246 overall quality of evidence in this field. Therefore, individual quality scores were not compiled for  
247 each article, but scores were aggregated according to items. Complete scores for each article  
248 and each item are available in Appendix 4. Out of 94 systematic reviews, the most commonly  
249 fully satisfied criterion was #1 (PICO components) with 81/94 (86%) of included systematic  
250 reviews fully satisfying this criterion. The next most commonly-satisfied criteria were #16  
251 (potential sources of conflict of interest reported) (78/94 = 83% fully), #13 (account for  
252 limitations in individual studies) (70/94 = 75% fully and 2/94 = 2% partially), #7 (explain both  
253 inclusion and exclusion criteria) (64/94 = 68% fully and 19/94 = 20% partially), #8 (description of  
254 included studies in adequate detail) (36/94 = 38% fully and 41/94 = 44% partially), and #4 (use  
255 of a comprehensive literature search strategy) (0/94 = 0% fully and 80/94 = 85% partially). For  
256 criteria #11, #12, and #15, which only applied to reviews including meta-analyses, 17/18 (94%)  
257 fully satisfied criterion #11 (use of an appropriate methods for statistical combination of results),  
258 12/18 (67%) fully satisfied criterion #12 (assessment of the potential impact of RoB in individual  
259 studies) (1/18 = 6% partially), and 11/18 (61%) fully satisfied criterion #15 (an adequate  
260 investigation of publication bias, small study bias).

## 261 Climate Impacts and Health Outcomes

262 Regarding climate impacts, we identified five mutually exclusive categories, with 13 publications  
263 targeting more than one category of climate impacts: 1) Meteorological (n = 71 papers) (e.g.,  
264 temperature, heat waves, humidity, precipitation), 2) Extreme weather (n = 24) (e.g., water-  
265 related, floods, cyclones, hurricanes, drought), 3) Air quality (n = 7) (e.g., air pollution and  
266 wildfire smoke exposure), 4) General (n = 5), and 5) Other (n = 3). "General" climate impacts  
267 included articles that did not specify climate change impacts but stated general climate change  
268 as their focus. "Other" climate impacts included studies investigating other effects indirectly  
269 related to climate change (e.g., impact of environmental contaminants) or general environmental  
270 risk factors (e.g., environmental hazards, sanitation and access to clean water.)  
271

1  
2  
3 272 We identified ten categories to describe the health outcomes studied by the systematic reviews,  
4 273 and 29 publications targeted more than one category of health outcomes: 1) Infectious diseases  
5 274 (n = 41 papers) (vector-, food- and water-borne), 2) Mortality (n = 32), 3) Respiratory,  
6 275 cardiovascular, and neurological (n = 23), 4) Healthcare systems (n = 16), 5) Mental health (n =  
7 276 13), 6) Pregnancy and birth (n = 11), 7) Nutritional (n = 9), 8) Skin diseases and allergies (n =  
8 277 8), 9) Occupational health and injuries (n = 6) and 10) Other health outcomes (n = 17) (e.g.,  
9 278 sleep, arthritis, disability-adjusted life years, non-occupational injuries, etc.)  
10  
11 279

12  
13 280 Figure 4 depicts the combinations of climate impact and health outcome for each study, with  
14 281 Appendix 5 offering further details. The 5 most common combinations are studies investigating  
15 282 the 1) meteorological impacts on infectious diseases (n = 35), 2) mortality (n = 24) and 3)  
16 283 respiratory, cardiovascular, and neurological outcomes (n = 17), 4) extreme weather events'  
17 284 impacts on infectious diseases (n = 14), and 5) meteorological impacts on health systems (n =  
18 285 11).  
19  
20 286

### 21 287 **Insert Figure 4 About Here**

22 288

23  
24 289 For studies investigating meteorological impacts on health, the three most common health  
25 290 outcomes studied were impacts on 1) infectious diseases (n = 35), 2) mortality (n = 24) and 3)  
26 291 respiratory, cardiovascular, and neurological outcomes (n = 17). Extreme weather event studies  
27 292 most commonly reported health outcomes related to 1) infectious diseases (n = 14), 2) mental  
28 293 health outcomes (n = 9) and 3) nutritional outcomes (n = 6) and other health outcomes (e.g.,  
29 294 injuries, sleep) (n = 6). Studies focused on the impact of air quality were less frequent and  
30 295 explored mostly health outcomes linked to 1) respiratory, cardiovascular, and neurological  
31 296 outcomes (n = 6), 2) mortality (n = 5) and 3) pregnancy and birth outcomes (n = 3).  
32  
33  
34

## 35 297 **Summary of Findings**

36 298 Most reviews suggest a deleterious impact of climate change on multiple adverse health  
37 299 outcomes, with some associations being explored and/or supported with consistent findings  
38 300 more often than others. Some reviews also report conflicting findings or an absence of  
39 301 association between the climate impact and health outcome studied (see Table 1 for a detailed  
40 302 summary of findings according to health outcomes).  
41  
42 303

43  
44 304 Notable findings of health outcomes according to climate impact include the following. For  
45 305 meteorological factors (n = 71), temperature and humidity are the variables most often studied  
46 306 and report the most consistent associations with infectious diseases and respiratory,  
47 307 cardiovascular, and neurological outcomes. Temperature is also consistently associated with  
48 308 mortality and healthcare service use. Some associations are less frequently studied, but remain  
49 309 consistent, including the association between some meteorological factors (e.g., temperature  
50 310 and heat) and some adverse mental health outcomes (e.g., hospital admissions for mental  
51 311 health reasons, suicide, exacerbation of previous mental health conditions), and the association  
52 312 between heat and adverse occupational outcomes and some adverse birth outcomes.  
53  
54 313 Temperature is also associated with adverse nutritional outcomes (likely via crop production and  
55 314 food insecurity) and temperature and humidity are associated with some skin diseases and  
56  
57  
58  
59  
60

1  
2  
3 315 allergies. Some health outcomes are less frequently studied, but studies suggest an association  
4 316 between temperature and diabetes, impaired sleep, cataracts, heat stress, heat exhaustion and  
5 317 renal diseases.  
6

7 318  
8 319 Extreme weather events (n = 24) are consistently associated with mortality, some mental health  
9 320 outcomes (e.g., distress, anxiety, depression) and adverse nutritional outcomes (likely via crop  
10 321 production and food insecurity). Some associations are explored less frequently, but these  
11 322 studies suggest an association between drought and respiratory and cardiovascular outcomes  
12 323 (likely via air quality), between extreme weather events and an increased use of healthcare  
13 324 services and some adverse birth outcomes (likely due to indirect causes, such as experiencing  
14 325 stress). Some health outcomes are less frequently studied, but studies suggest an association  
15 326 between extreme weather events and injuries, impaired sleep, esophageal cancer and  
16 327 exacerbation of chronic illnesses. There are limited and conflicting findings for the association  
17 328 between extreme weather events and infectious diseases, as well as for certain mental health  
18 329 outcomes (e.g., suicide and substance abuse). At times, different types of extreme weather  
19 330 events (e.g., drought vs flood) led to conflicting findings for some health outcomes (e.g., mental  
20 331 health outcomes, infectious diseases), but for other health outcomes, the association was  
21 332 consistent independently of the extreme weather event studied (e.g., mortality, healthcare  
22 333 service use and nutritional outcomes).  
23  
24  
25  
26

27 334  
28 335 The impact of air quality on health (n = 7) was less frequently studied, but the few studies  
29 336 exploring this association report consistent findings regarding an association with respiratory-  
30 337 specific mortality, adverse respiratory outcomes and an increase in healthcare service use.  
31 338 There is limited evidence regarding the association between air quality and cardiovascular  
32 339 outcomes, limited and inconsistent evidence between wildfire smoke exposure and adverse  
33 340 birth outcomes, and no association is found between exposure to wildfire smoke and increase in  
34 341 use of health services for mental health reasons. Only one review explored the impact of wildfire  
35 342 smoke exposure on ophthalmic outcomes, and it suggests that it may be associated with eye  
36 343 irritation and cataracts.  
37  
38

39 344  
40 345 Reviews investigating the general impacts of climate change on health are less frequent (n = 5),  
41 346 but they suggest an association between climate change generally and pollen allergies in  
42 347 Europe, increased use of healthcare services, obesity, skin diseases and allergies and an  
43 348 association with disability-adjusted life years. Reviews investigating the impact of other climate-  
44 349 related factors (n = 3) show inconsistent findings concerning the association between  
45 350 environmental pollutant and adverse birth outcomes, and two reviews suggest an association  
46 351 between environmental risk factors and pollutants and childhood stunting and occupational  
47 352 diseases.  
48

49 353  
50 354 Most reviews concluded by calling for more research, noting the limitations observed among the  
51 355 studies included in their reviews, as well as limitations in their reviews themselves. These  
52 356 limitations included, amongst others, some systematic reviews having a small number of  
53 357 publications,<sup>24,25</sup> language restrictions such as including only papers in English,<sup>26,27</sup> arriving at  
54 358 conflicting evidence,<sup>28</sup> difficulty concluding a strong association due to the heterogeneity in  
55  
56  
57  
58  
59

359 methods and measurements or the limited equipment and access to quality data in certain  
 360 contexts,<sup>24,29–31</sup> and most studies included were conducted in high-income countries.<sup>32,33</sup>

361  
 362 Previous authors also discussed the important challenge related to exploring the relationship  
 363 between climate change and health. Not only is it difficult to explore the potential causal  
 364 relationship between climate change and health, mostly due to methodological challenges, but  
 365 there are also a wide variety of complex causal factors that may interact to determine health  
 366 outcomes. Therefore, the possible causal mechanisms underlying these associations were at  
 367 times still unknown or uncertain and the impacts of some climate factors were different  
 368 according to geographical location and specificities of the context. Nonetheless, some reviews  
 369 offered potential explanations for the climate-health association, with the climate factor at times,  
 370 having a direct impact on health (e.g., flooding causing injuries, heat causing dehydration) and  
 371 in other cases, having an indirect impact (e.g., flooding causing stress which in turn may cause  
 372 adverse birth outcomes, heat causing difficulty concentrating leading to occupational injuries.)

373  
 374 **Table 1.** Summary of findings from systematic reviews according to health outcome and climate  
 375 impact. Reviews that covered multiple climate impacts are listed in each relevant category.

| Climate Impact                                   | F  | Summary of Findings                                                                                                                                                                                                                                                                                                                                                                                                                                                                                                                                                                                                                                                                                                                                                                                                                                                                                                                                                               |
|--------------------------------------------------|----|-----------------------------------------------------------------------------------------------------------------------------------------------------------------------------------------------------------------------------------------------------------------------------------------------------------------------------------------------------------------------------------------------------------------------------------------------------------------------------------------------------------------------------------------------------------------------------------------------------------------------------------------------------------------------------------------------------------------------------------------------------------------------------------------------------------------------------------------------------------------------------------------------------------------------------------------------------------------------------------|
| <b>Infectious diseases (n = 41)</b>              |    |                                                                                                                                                                                                                                                                                                                                                                                                                                                                                                                                                                                                                                                                                                                                                                                                                                                                                                                                                                                   |
| <i>Vector borne infectious diseases (n = 25)</i> |    |                                                                                                                                                                                                                                                                                                                                                                                                                                                                                                                                                                                                                                                                                                                                                                                                                                                                                                                                                                                   |
| Meteorological                                   | 22 | Systematic reviews suggest that meteorological factors, such as temperature, precipitation, humidity, and wind, are associated with diverse vector-borne infectious diseases, including malaria and dengue. <sup>9,12,26,29,31,34–50</sup> This association was mostly proportional (e.g., higher temperature and increased rainfall associated with vector-borne diseases), although findings were at times conflicting, with some suggesting an inversely proportional association <sup>12</sup> (e.g., decreased rainfall) or no association at all <sup>39</sup> (e.g., with the human puumala hantavirus Infection.) Geographic location, seasonality and potential interaction with other climate-related factors may partly explain these inconsistencies. <sup>12,29</sup> Temperature, humidity and rainfall were the most common and important meteorological factors reported by reviews and factors such as wind, air pressure and sunshine were reported less often. |
| Extreme weather                                  | 7  | There are limited and conflicting findings concerning the association of extreme weather events with vector-borne diseases. Some reviews suggest water-related extreme events <sup>51</sup> and flooding <sup>6,31,52</sup> are associated with an increased risk of vector-borne diseases, while drought is associated with a reduction of dengue incidence. <sup>12</sup> Other reviews focused specifically on Puerto Rico <sup>43</sup> and Australia <sup>53</sup> did not find an association between hurricanes and/or floods and mosquito-borne disease transmission.                                                                                                                                                                                                                                                                                                                                                                                                     |

| <i>Food and water borne infectious diseases (n = 19)</i> |    |                                                                                                                                                                                                                                                                                                                                                                                                                                                                                                                                                                                                                                                                                                                                                                                                                                                                                                                                                                                                                                                                                                                                                                                                                         |
|----------------------------------------------------------|----|-------------------------------------------------------------------------------------------------------------------------------------------------------------------------------------------------------------------------------------------------------------------------------------------------------------------------------------------------------------------------------------------------------------------------------------------------------------------------------------------------------------------------------------------------------------------------------------------------------------------------------------------------------------------------------------------------------------------------------------------------------------------------------------------------------------------------------------------------------------------------------------------------------------------------------------------------------------------------------------------------------------------------------------------------------------------------------------------------------------------------------------------------------------------------------------------------------------------------|
| Meteorological                                           | 14 | Reviews suggest that meteorological factors, such as temperature, precipitation, and humidity, are associated with diverse food- and water-borne infectious diseases, in particular, cholera, schistosomiasis, salmonella and E. coli gastroenteritis. <sup>11,31,40,42,45,48,54–61</sup> Overall, higher temperatures and humidity, <sup>11,40,54,58</sup> along with lower precipitation <sup>42,61</sup> was associated with these infectious diseases. Directionality and strength of the association seemed to vary according to disease and pathogens, <sup>59</sup> seasons, and geographic region. <sup>56</sup>                                                                                                                                                                                                                                                                                                                                                                                                                                                                                                                                                                                                |
| Extreme weather                                          | 10 | Reviews suggest a proportional association between extreme water-related events, <sup>47,51,62</sup> such as flooding <sup>6,40,52</sup> and heavy rainfall <sup>34</sup> , and food- and water-borne diseases, including diarrhea, food contamination, cholera. <sup>6,31,34,40,45,47,51,52,57,62</sup> Drought may also be proportionally associated with food- and water-borne disease, <sup>34,63</sup> but these associations are less consistent than those with water-related extreme events. <sup>57</sup>                                                                                                                                                                                                                                                                                                                                                                                                                                                                                                                                                                                                                                                                                                      |
| <i>Other infectious diseases (n = 8)</i>                 |    |                                                                                                                                                                                                                                                                                                                                                                                                                                                                                                                                                                                                                                                                                                                                                                                                                                                                                                                                                                                                                                                                                                                                                                                                                         |
| Meteorological                                           | 8  | Reviews suggest an association of most meteorological factors, such as temperature and humidity, with various other infectious diseases, including meningitis, <sup>24,34</sup> Ebola, <sup>24</sup> influenza, <sup>31</sup> and pediatric infectious diseases such as hand-foot-and-mouth disease. <sup>7,8,30,49,55</sup> This association was mostly proportional for meteorological factors such as temperature, <sup>7,8,49</sup> diurnal temperature range, <sup>30</sup> and humidity, <sup>7,8,31</sup> although some meteorological factors, such as air pressure <sup>8</sup> and lower temperatures <sup>31,49</sup> were inversely proportional to these diseases. Some conflicting evidence is reported concerning the association with some meteorological factors, such as sunshine with hand-foot-and-mouth disease, <sup>7,8</sup> and humidity and pediatric infectious diseases. <sup>55</sup> No association was found between some meteorological factors, such as precipitation, wind speed and sunshine with hand-foot-and-mouth disease. <sup>7,8</sup>                                                                                                                                        |
| <b>Mortality (n = 32)</b>                                |    |                                                                                                                                                                                                                                                                                                                                                                                                                                                                                                                                                                                                                                                                                                                                                                                                                                                                                                                                                                                                                                                                                                                                                                                                                         |
| Meteorological                                           | 24 | Reviews suggest that temperature (high, low, or diurnal range) was consistently associated with all-cause and cause-specific mortality. <sup>24–26,30,33,42,45,47,49,64–77</sup> A strong association was reported between heat (including heat waves) and mortality (all-cause), <sup>64</sup> heat-, <sup>42,69</sup> stroke-, <sup>24,70</sup> cardiovascular-, <sup>33,47</sup> and respiratory-related, <sup>26,33,71</sup> especially in rural, <sup>68</sup> very young children <sup>49</sup> and ageing populations. <sup>25</sup> Mortality seems to be the most frequent health outcome studied in association with heatwaves. <sup>65</sup> Inconsistent results are found concerning the association between heat and childhood mortality. <sup>75</sup> Due to limited evidence, this association was weaker in some geographical regions. <sup>24,72</sup> Also, heat wave intensity (compared to duration) was more strongly associated with heat-related mortality. <sup>76</sup> Finally, although less studied, low temperature was also associated with mortality, <sup>49,77</sup> specifically respiratory, <sup>64</sup> stroke, <sup>70</sup> and cardiovascular mortality. <sup>47,67,71</sup> |

|                                                               |    |                                                                                                                                                                                                                                                                                                                                                                                                                                                                                                                                                                                                                                                                                                                                                                                                                                                                                                                                                                                                                                                                                                                                        |
|---------------------------------------------------------------|----|----------------------------------------------------------------------------------------------------------------------------------------------------------------------------------------------------------------------------------------------------------------------------------------------------------------------------------------------------------------------------------------------------------------------------------------------------------------------------------------------------------------------------------------------------------------------------------------------------------------------------------------------------------------------------------------------------------------------------------------------------------------------------------------------------------------------------------------------------------------------------------------------------------------------------------------------------------------------------------------------------------------------------------------------------------------------------------------------------------------------------------------|
| Extreme Weather                                               | 5  | Reviews suggest an association between extreme weather events such as floods, <sup>6</sup> droughts, <sup>63</sup> cyclones <sup>78</sup> and other water-related events, <sup>26,51</sup> with direct (e.g., drowning) and indirect long-term mortality (e.g., due to malnutrition, environmental toxin exposure, armed conflict, etc.). <sup>6,51,63,78</sup>                                                                                                                                                                                                                                                                                                                                                                                                                                                                                                                                                                                                                                                                                                                                                                        |
| Air quality                                                   | 5  | Reviews suggest an association between exposure to air pollution <sup>26,79</sup> or wildfire smoke <sup>80–82</sup> and air pollution related-mortality, such as respiratory-specific mortality. There is currently limited evidence, but reviews suggest a potential association between wildfire smoke exposure and cardiovascular-specific mortality. <sup>80–82</sup>                                                                                                                                                                                                                                                                                                                                                                                                                                                                                                                                                                                                                                                                                                                                                             |
| <b>Respiratory, neurological, and cardiovascular (n = 23)</b> |    |                                                                                                                                                                                                                                                                                                                                                                                                                                                                                                                                                                                                                                                                                                                                                                                                                                                                                                                                                                                                                                                                                                                                        |
| General                                                       | 1  | A review suggests a proportional association between climate change, in general, and ragweed pollen allergies in Europe. <sup>83</sup>                                                                                                                                                                                                                                                                                                                                                                                                                                                                                                                                                                                                                                                                                                                                                                                                                                                                                                                                                                                                 |
| Meteorological                                                | 17 | Reviews suggest an association between meteorological factors, such as temperature and humidity, and cardiovascular, respiratory and neurological outcomes. <sup>24,26,30,33,36,45,49,55,64,67,69,70,74,75,84–86</sup> Exposure to high temperatures and extreme heat are associated to cardiovascular and respiratory diseases, <sup>24,26,36,49,67</sup> stroke, <sup>70</sup> long-term neurological outcomes (due to heat strokes), <sup>69</sup> myocardial infarction, <sup>33,85</sup> and childhood asthma and pediatric respiratory diseases. <sup>75,86</sup> A review also suggests a beneficial association between heat and the shortening of a respiratory virus season. <sup>45</sup> Exposure to low temperature (cold), temperature drop, or diurnal temperature range was associated with cardiovascular and respiratory diseases, <sup>30,64,67</sup> stroke, <sup>70</sup> and myocardial infarctions. <sup>33</sup> Humidity (most often high humidity, but also lower humidity) and low temperatures were also associated with respiratory diseases in children, including childhood asthma. <sup>55,84,86</sup> |
| Extreme Weather                                               | 1  | A previous review suggests an association between drought and respiratory and cardiovascular outcomes, most likely due to droughts leading to increased dust in the air. <sup>63</sup>                                                                                                                                                                                                                                                                                                                                                                                                                                                                                                                                                                                                                                                                                                                                                                                                                                                                                                                                                 |
| Air quality                                                   | 6  | Reviews suggest a proportional association between exposure to air pollution <sup>26,42,45</sup> or wildfire smoke exposure <sup>80–82</sup> and respiratory outcomes, including asthma, chronic obstructive pulmonary disease, coughing, wheezing, and overall lung function. Although there is currently limited evidence, <sup>80</sup> reviews also suggest a potential association between air pollution or wildfire smoke exposure and cardiovascular outcomes. <sup>45,81,82</sup>                                                                                                                                                                                                                                                                                                                                                                                                                                                                                                                                                                                                                                              |
| <b>Health systems (n = 16)</b>                                |    |                                                                                                                                                                                                                                                                                                                                                                                                                                                                                                                                                                                                                                                                                                                                                                                                                                                                                                                                                                                                                                                                                                                                        |
| General                                                       | 1  | A previous review suggests that climate change in general puts a strain on public health resources, via population health issues and shows that using an integrated surveillance system may guide future adaptation to climate change. <sup>87</sup>                                                                                                                                                                                                                                                                                                                                                                                                                                                                                                                                                                                                                                                                                                                                                                                                                                                                                   |
| Meteorological                                                | 11 | Previous reviews suggest an association between temperature change <sup>30</sup> extreme heat, aridity and cold temperatures and an increase in use of healthcare services (mostly linked to heat-related health impacts), such as an increase in emergency                                                                                                                                                                                                                                                                                                                                                                                                                                                                                                                                                                                                                                                                                                                                                                                                                                                                            |



|                                              |   |                                                                                                                                                                                                                                                                                                                                                                                                                                                                                                                                                    |
|----------------------------------------------|---|----------------------------------------------------------------------------------------------------------------------------------------------------------------------------------------------------------------------------------------------------------------------------------------------------------------------------------------------------------------------------------------------------------------------------------------------------------------------------------------------------------------------------------------------------|
|                                              |   | department visits, hospital admissions and use of ambulances. <sup>24,26,30,33,42,49,65,72,75,85,88</sup>                                                                                                                                                                                                                                                                                                                                                                                                                                          |
| Extreme weather                              | 2 | Reviews suggest that extreme weather events <sup>32</sup> and flooding <sup>6</sup> may be associated with an increase in use of healthcare services (e.g., increased hospitalizations) and a compromised quality of care as extreme weather events may lead to power outages. <sup>32</sup>                                                                                                                                                                                                                                                       |
| Air quality                                  | 2 | Reviews suggest an association between wildfire smoke exposure and an increase in use of healthcare services, such as an increase in emergency department visits. <sup>80,82</sup>                                                                                                                                                                                                                                                                                                                                                                 |
| <b>Mental health (n = 13)</b>                |   |                                                                                                                                                                                                                                                                                                                                                                                                                                                                                                                                                    |
| Meteorological                               | 3 | Reviews suggest an association of most meteorological factors such as temperature increase, aridity, heat, and heat waves with mental health outcomes, including hospital admissions for mental health reasons, <sup>42</sup> suicide, <sup>89</sup> and exacerbation of pre-existing mental health conditions, difficulty sleeping, and fatigue. <sup>85</sup> No association was found between sunlight duration and suicide incidence. <sup>89</sup>                                                                                            |
| Extreme weather                              | 9 | Most reviews reported a proportional association of extreme weather events, <sup>45,51,90,91</sup> flooding, <sup>6,26,92</sup> and drought <sup>63,93</sup> with diverse mental health issues, including, psychological distress, post-traumatic stress disorder, anxiety, depression, psychotropic medication use, alcohol consumption. There was conflicting evidence regarding the association of floods with suicide, tobacco, alcohol and substance abuse. <sup>92</sup> No association was found between drought and suicide. <sup>63</sup> |
| Air quality                                  | 1 | A previous review suggests no association between wildfire smoke exposure and mental health, as measured by physician visits and hospitalizations for mental health reasons during wildfires. <sup>81</sup>                                                                                                                                                                                                                                                                                                                                        |
| <b>Pregnancy and birth outcomes (n = 11)</b> |   |                                                                                                                                                                                                                                                                                                                                                                                                                                                                                                                                                    |
| Meteorological                               | 5 | Reviews suggest that adverse birth outcomes may be higher among people exposed to meteorological factors such as high temperature, heat, sunlight intensity, cold and humidity. <sup>42,94–97</sup> These outcomes include low birth weight, preterm birth, eclampsia and preeclampsia, hypertension and length of pregnancy. <sup>42,94–97</sup> The association between heat and adverse birth outcomes seems to have stronger support than the association with cold temperatures. <sup>97</sup>                                                |
| Extreme Weather                              | 2 | Reviews suggest a potential association of extreme weather events <sup>90</sup> and flooding <sup>6</sup> with adverse birth outcomes, such as low birth weight, preterm birth and pre-eclampsia. It is suggested that extreme weather events may indirectly affect birth outcomes via the pregnant person's well-being (e.g., stress and worry during pregnancy.) <sup>6,90</sup>                                                                                                                                                                 |

|                                                 |   |                                                                                                                                                                                                                                                                                                                                                                                                                                                                                                                                                                      |
|-------------------------------------------------|---|----------------------------------------------------------------------------------------------------------------------------------------------------------------------------------------------------------------------------------------------------------------------------------------------------------------------------------------------------------------------------------------------------------------------------------------------------------------------------------------------------------------------------------------------------------------------|
| Air quality                                     | 3 | There is limited and inconsistent evidence concerning the association between wildfire smoke exposure and adverse birth outcomes, but reviews suggest a potential proportional association between wildfire smoke exposure and lower birth weight. <sup>80–82</sup>                                                                                                                                                                                                                                                                                                  |
| Other                                           | 1 | The association between environmental pollutants and adverse birth outcomes (i.e., preterm birth) remains unclear due to conflicting evidence. <sup>28</sup>                                                                                                                                                                                                                                                                                                                                                                                                         |
| <b>Nutritional (n = 9)</b>                      |   |                                                                                                                                                                                                                                                                                                                                                                                                                                                                                                                                                                      |
| General                                         | 1 | A review suggests an association between climate change and obesity. <sup>98</sup>                                                                                                                                                                                                                                                                                                                                                                                                                                                                                   |
| Meteorological                                  | 4 | Reviews suggest an association between meteorological factors, such as changes in temperature, heat and precipitation, with diverse nutritional outcomes, including undernutrition, malnutrition and child stunting. <sup>24,27,42,72</sup> This association may be explained by the impact of meteorological factors, such as temperature increase and precipitation decrease, on crop production and food insecurity. <sup>42,72</sup>                                                                                                                             |
| Extreme Weather                                 | 6 | Reviews suggest an association between extreme weather events, such as flooding and droughts, <sup>63</sup> and diverse nutritional outcomes, including malnutrition and undernutrition in children and adults <sup>27,34,42,45,47</sup> via, amongst others, crops production and food insecurity (e.g., low food aid following flooding <sup>42</sup> ).                                                                                                                                                                                                           |
| Other                                           | 1 | A review suggests a potential association between certain environmental risk factors (e.g., sanitation, cooking fuels and food-borne mycotoxins), and childhood stunting, which could be aggravated by climate change. <sup>99</sup>                                                                                                                                                                                                                                                                                                                                 |
| <b>Skin diseases and allergies (n = 8)</b>      |   |                                                                                                                                                                                                                                                                                                                                                                                                                                                                                                                                                                      |
| General                                         | 1 | A review suggests a potential proportional association between climate change, in general, and skin and soft tissue infections (e.g., fatal vibrio vulnificus necrotizing). <sup>100</sup>                                                                                                                                                                                                                                                                                                                                                                           |
| Meteorological                                  | 7 | Reviews suggest an association of meteorological factors, such as ultraviolet light exposure, temperature and humidity, with diverse skin diseases and allergies, including skin cancer, sunburn, acute urticaria, eczema and pediatric skin irritabilities. <sup>24,45,47,49,55,85,101</sup> Higher temperature and ultraviolet light exposure is proportionally associated with sunburn <sup>85</sup> and skin cancer, <sup>45,101</sup> while low humidity and low temperatures were associated with eczema and skin irritabilities in children. <sup>49,55</sup> |
| <b>Occupational health and injuries (n = 6)</b> |   |                                                                                                                                                                                                                                                                                                                                                                                                                                                                                                                                                                      |

|                       |    |                                                                                                                                                                                                                                                                                                                                                                                                                                                                                                                                                                                                                                                    |
|-----------------------|----|----------------------------------------------------------------------------------------------------------------------------------------------------------------------------------------------------------------------------------------------------------------------------------------------------------------------------------------------------------------------------------------------------------------------------------------------------------------------------------------------------------------------------------------------------------------------------------------------------------------------------------------------------|
| Meteorological        | 6  | Reviews suggest that heat is associated with adverse occupational health outcomes, including injuries (e.g., slips, trips, falls, wounds, lacerations and amputations), heat strain, dehydration and kidney diseases. <sup>102-107 103</sup> This association was found in many occupational settings, including agriculture, construction, transport and fishing, and seems to affect both outdoor and indoor workers. <sup>102</sup> This association may be explained by a combination of direct (e.g., dehydration) and indirect factors (e.g., impaired cognitive and physical performance.) <sup>106</sup>                                   |
| Other                 | 1  | A review suggests a potential association between environmental pollution (e.g., heavy metals, fertilizers, etc.) and occupational diseases, such as chronic kidney disease. <sup>107</sup> This association is suggested to be affected by increasing temperatures.                                                                                                                                                                                                                                                                                                                                                                               |
| <b>Other (n = 17)</b> |    |                                                                                                                                                                                                                                                                                                                                                                                                                                                                                                                                                                                                                                                    |
| General               | 1  | A review suggests a potential association between climate change in general and disability-adjusted life years, which is an indicator that quantifies 'the burden of disease attributable to climate change'. <sup>108</sup> Authors suggest that the cost of disability-adjusted life years could be high, especially in low to middle income countries.                                                                                                                                                                                                                                                                                          |
| Meteorological        | 10 | Reviews suggests an association between increasing temperatures and temperature changes, <sup>30</sup> and other various health outcomes, including acute gouty arthritis, <sup>109</sup> unintentional injuries, <sup>110</sup> diabetes, <sup>64</sup> genitourinary diseases, <sup>30,64</sup> impaired sleep time and quality, <sup>111</sup> cataracts (indirectly associated via people spending more time outside and therefore increased exposure to ultraviolet light), <sup>45,47</sup> heat stress, heat exhaustion and kidney failure, <sup>85</sup> and renal diseases, fever and electrolyte imbalance in children. <sup>49,75</sup> |
| Extreme weather       | 6  | Reviews suggests an association between extreme weather events, <sup>91</sup> such as flooding, <sup>6</sup> cyclones, <sup>78</sup> hurricanes, <sup>111</sup> and drought, <sup>63</sup> and other various health outcomes including injuries (e.g., debris, diving in water that is shallower than expected), <sup>6,63,78,91</sup> impaired sleep, <sup>111</sup> esophageal cancer (likely linked to high salinity of water due to droughts), <sup>63</sup> and exacerbation of chronic illnesses. <sup>6,90</sup>                                                                                                                            |
| Air quality           | 1  | There is limited evidence, but a systematic review suggests a potential association between wildfire smoke exposure and ophthalmic outcomes, such as eye irritation and cataracts. <sup>80</sup>                                                                                                                                                                                                                                                                                                                                                                                                                                                   |

## 376 Discussion

### 377 Principal results

378 In this overview of systematic reviews, we aimed to develop a synthesis of systematic reviews  
379 of health impacts of climate change by mapping the characteristics and findings of studies  
380 exploring the relationship between climate change and health. We identified four key findings.

381  
382 First, the most common climate impact studied by included publications consists of  
383 meteorological impacts, mostly related to temperature and humidity, which aligns with findings  
384 from a previous scoping review on the health impacts of climate change in the Philippines.<sup>10</sup>  
385 Indeed, meteorological factors' impact on all health outcomes are explored, although some  
386 health outcomes are more rarely explored (e.g., mental health and nutritional outcomes).  
387 Although this may not be surprising given that a key implication of climate change is the rise in  
388 temperature, this finding suggests we also need to undertake research focused on other climate  
389 impacts on health, such as the impact of droughts and wildfire smoke, to better prepare for the  
390 health crises that arise from these ever-increasing climate-related impacts. For instance, the  
391 impacts of extreme weather events and air quality on certain health outcomes are not explored  
392 (e.g., skin diseases and allergies, occupational health) or only rarely explored (e.g., pregnancy  
393 outcomes).

394  
395 Second, systematic reviews primarily focus on physical health outcomes, such as infectious  
396 diseases, mortality, and respiratory, cardiovascular and neurological outcomes, which also  
397 aligns with the country-specific previous scoping review.<sup>10</sup> Regarding mortality, we support  
398 Campbell and colleagues<sup>65</sup> suggestion that we should expand our focus to include other types  
399 of health outcomes. This will allow us to better mitigate and adapt to the full range of threats of  
400 climate change.

401  
402 Moreover, it is unclear whether the distribution of frequencies of health outcomes reflects the  
403 actual burden of health impacts of climate change, or if the most frequently-reported outcomes  
404 reflect a bias of Western definitions of health. The most commonly-studied health outcomes do  
405 not necessarily reflect the definition of health presented by the WHO as, "a state of complete  
406 physical, mental and social well-being and not merely the absence of disease or infirmity."<sup>20</sup>  
407 This suggests that future studies should investigate in greater depth the impacts of climate  
408 change on mental and broader social well-being. Indeed, some reviews suggested that climate  
409 change impacts psychological and social well-being, via broader consequences, such as  
410 political instability, health system capacity, migration, and crime,<sup>3,4,85,90</sup> thus illustrating how our  
411 personal health is determined not only by biological and environmental factors but also by social  
412 and health systems. The importance of expanding our scope of health in this field is also  
413 recognized in the most recent Lancet report, which states that future reports will include a new  
414 mental health indicator.<sup>2</sup>

415  
416 Interestingly, the reviews that explored the mental health impacts of climate change were  
417 focused mostly on the direct and immediate impacts of experiencing extreme weather events.

1  
2  
3 418 However, psychologists are also warning about the long-term indirect mental health impacts of  
4 419 climate change, which are becoming more prevalent for children and adults alike (e.g., eco-  
5 420 anxiety, climate depression).<sup>112,113</sup> Even people who do not experience direct climate impacts,  
6 421 such as extreme weather events, report experiencing distressing emotions when thinking of the  
7 422 destruction of our environment or when worrying about one's uncertain future and the lack of  
8 423 actions being taken. To foster emotional resilience in the face of climate change, these mental  
9 424 health impacts of climate change need to be further explored. Humanity's ability to adapt to and  
10 425 mitigate climate change ultimately depends on our emotional capacity to face this threat.  
11  
12 426

13  
14 427 Third, there is a notable geographic difference in the country affiliations of first authors, with  
15 428 three quarters of systematic reviews having been led by first authors affiliated to institutions in  
16 429 Europe, Australia, or North America, which aligns with the findings of the most recent Lancet  
17 430 report.<sup>2</sup> While perhaps unsurprising given the inequalities in research funding and institutions  
18 431 concentrated in Western countries, this is of critical importance given the significant health  
19 432 impacts that are currently faced (and will remain) in other parts of the world. Research funding  
20 433 organizations should seek to provide more resources to authors in low- to middle-income  
21 434 countries to ensure their expertise and perspectives are better represented in the literature.  
22  
23 435

24  
25 436 Fourth, overall, most reviews suggest an association between climate change and the  
26 437 deterioration of health in various ways, thus illustrating the interdependence of our health and  
27 438 well-being with the well-being of our environment. At times, climate change and its related  
28 439 environmental events may impact health directly (e.g., heat's impact on dehydration and  
29 440 exhaustion) and other times, it may impact it indirectly (e.g., via behavior change due to heat.)  
30 441 The most frequently explored and consistently supported associations include an association  
31 442 between temperature and humidity with infectious diseases, mortality, and adverse respiratory,  
32 443 cardiovascular and neurological outcomes. Other less frequently studied but consistent  
33 444 associations include associations between climate impacts and increased use of healthcare  
34 445 services, some adverse mental health outcomes, adverse nutritional outcomes, and adverse  
35 446 occupational health outcomes. These associations align with key findings of the most recent  
36 447 Lancet report, in which authors report, amongst others, increasing heat exposure being  
37 448 associated with increasing morbidities and mortality, climate change leading to food insecurity  
38 449 and undernutrition, and to an increase in infectious disease transmission.<sup>2</sup>  
39  
40 450

41  
42 451 That said, a number of reviews included in this study reported limited, conflicting and/or an  
43 452 absence of evidence regarding the association between the climate impact and health outcome.  
44 453 For instance, there was conflicting or limited evidence concerning the association between  
45 454 extreme weather events and infectious diseases, cardiorespiratory outcomes and some mental  
46 455 health outcomes and the association between air quality and cardiovascular-specific mortality  
47 456 and adverse birth outcomes. Finally, most reviews, whether they reported consistent evidence  
48 457 or not, concluded with the need for further research, as these associations are complex and  
49 458 likely determined by multiple interacting factors.  
50  
51 459

52  
53 460 The climate-health link has been the target of more research in recent years and it is also  
54 461 receiving increasing attention from the public and in both public health and climate  
55  
56  
57  
58  
59  
60

1  
2  
3 462 communication literature.<sup>2,114–116</sup> However, the health framing of climate change information is  
4 463 still underused in climate communications, and researchers suggest we should be doing more  
5 464 to make the link between human health and climate change more explicit to increase  
6 465 engagement with the climate crisis.<sup>2,116–118</sup> The health framing of climate communication also  
7 466 has implications for healthcare professionals<sup>119</sup> and policymakers, as these actors could play a  
8 467 key part in climate communication, adaptation, and mitigation.<sup>116,117,120</sup> These key stakeholders'  
9 468 perspectives on the climate-health link, as well as their perceived role in climate adaptation and  
10 469 mitigation could be explored,<sup>121</sup> since research suggests that health professionals are important  
11 470 voices in climate communications<sup>119</sup> and especially since, ultimately, these adverse health  
12 471 outcomes will engender pressure on and cost to our health systems and health workers.

## 16 17 472 Strengths and Limitations

18 473 To the best of our knowledge, the current study provides the first broad overview of previous  
19 474 systematic reviews exploring the health impacts of climate change. Our review has three main  
20 475 strengths. First, by targeting systematic reviews, we achieve a higher-order summary of findings  
21 476 than what would have been possible by consulting individual original studies. Second, by  
22 477 synthesizing findings across all included studies and according to the combination of climate  
23 478 impact and health outcome, we offer a clear, detailed, and unique summary of the current state  
24 479 of evidence and knowledge gaps about how climate change may influence human health. This  
25 480 summary may be of use to researchers, policymakers, and communities. Third, we included  
26 481 studies published in all languages about any climate impact and any health outcome. In doing  
27 482 so, we provide a comprehensive and robust overview.

28 483  
29 484 Our work has four main limitations. First, we were unable to access some full texts and  
30 485 therefore some studies were excluded, even though we deemed them potentially relevant after  
31 486 title and abstract inspection. Other potentially relevant systematic reviews may be missing due  
32 487 to unseen flaws in our systematic search. Second, due to the heterogeneity of the included  
33 488 systematic reviews and the relatively small proportion of studies reporting meta-analytic  
34 489 findings, we could not conduct meta-meta-analyses of findings across reviews. Future research  
35 490 is needed to quantify the climate and health links described in this review, as well as to  
36 491 investigate the causal relationship and other interacting factors. Third, due to limited resources,  
37 492 we did not assess overlap between the included reviews concerning the studies they included.  
38 493 Frequencies and findings should be interpreted with potential overlap in mind. Fourth, we  
39 494 conducted the systematic search of the literature in June 2019, and it is therefore likely that  
40 495 some recent systematic reviews are not included in this study.

## 47 48 496 Conclusions

49  
50 497 Overall, most systematic reviews of the health impacts of climate change suggest an  
51 498 association between climate change and the deterioration of health in multiple ways, generally  
52 499 in the direction that climate change is associated with adverse human health outcomes. This is  
53 500 worrisome since these outcomes are predicted to rise in the near future, due to the rise in  
54 501 temperature and increase in climate-change-related events such as extreme weather events

1  
2  
3 502 and worsened air quality. Most studies included in this review focused on meteorological  
4 503 impacts of climate change on adverse physical health outcomes. Future studies could fill  
5 504 knowledge gaps by exploring other climate-related impacts and broader psychosocial health  
6 505 outcomes. Moreover, studies on health impacts of climate change have mostly been conducted  
7 506 by first authors affiliated with institutions in high-income countries. This inequity needs to be  
8 507 addressed, considering that the impacts of climate change are and will continue to  
9 508 predominantly impact lower-income countries. Finally, although most reviews also recommend  
10 509 more research to better understand and quantify these associations, to adapt to and mitigate  
11 510 climate change's impacts on health, it will also be important to unpack the 'what, how, and  
12 511 where' of these effects. Health effects of climate change are unlikely to be distributed equally or  
13 512 randomly through populations. It will be important to mitigate the changing climate's potential to  
14 513 exacerbate health inequities.  
15  
16  
17  
18 514  
19  
20  
21 515  
22  
23  
24  
25  
26  
27  
28  
29  
30  
31  
32  
33  
34  
35  
36  
37  
38  
39  
40  
41  
42  
43  
44  
45  
46  
47  
48  
49  
50  
51  
52  
53  
54  
55  
56  
57  
58  
59  
60

## 516 Acknowledgements

517 The authors gratefully acknowledge the contributions of Selma Chipenda Dansokho, as  
518 research associate, and Thierry Provencher, as research assistant, to this project, and of  
519 Frederic Bergeron, for assistance with search strategy, screening and selection of articles for  
520 the systematic review.

## 521 Funding

522 This study was funded by the Canadian Institutes of Health Research (CIHR) FDN-148426. The  
523 CIHR had no role in determining the study design, the plans for data collection or analysis, the  
524 decision to publish, nor the preparation of this manuscript. ACT is funded by a Tier 2 Canada  
525 Research Chair in Knowledge Synthesis. HOW is funded by a Tier 2 Canada Research Chair in  
526 Human-Centred Digital Health.

## 527 Ethics Committee Approval

528 Since this is a systematic review of previous systematic reviews, no ethics approval was  
529 required, as we did not collect original data.

## 530 Authors' Contributions

531 RN, CF, ACT, HOW contributed to the design of the study. CB, RN, LPB, RAPR and HOW  
532 contributed to the systematic search of the literature and selection of studies. RR, HOW, LC  
533 conducted data analysis and interpretation. RR and HOW drafted the first version of the article  
534 with early revision by CB, LC and RN. All authors critically revised the article and approved the  
535 final version for submission for publication. RR and HOW had full access to all the data in the  
536 study and had final responsibility for the decision to submit for publication.

## 537 Conflict of Interest Statement

538 The authors have no conflict of interest to declare.

## 539 Data Sharing Statement

540 No additional data available.

541



542 

## References

- 543 1 Portier C, Tart K, Carter S, *et al.* A Human Health Perspective On Climate Change A  
544 Report Outlining the Research Needs on the Human Health Effects of Climate Change.  
545 Environmental Health Perspectives and the National Institute of Environmental Health  
546 Sciences , 2010.
- 547 2 Watts N, Amann M, Arnell N, *et al.* The 2020 report of The Lancet Countdown on health  
548 and climate change: responding to converging crises. *Lancet* 2021; **397**: 129–70.
- 549 3 Hsiang SM, Burke M. Climate, conflict, and social stability: what does the evidence say?  
550 *Clim Change* 2014; **123**: 39–55.
- 551 4 Hsiang SM, Burke M, Miguel E. Quantifying the Influence of Climate on Human Conflict.  
552 *Science* 2013; **341**. DOI:10.1126/science.1235367.
- 553 5 Patz JA, Frumkin H, Holloway T, Vimont DJ, Haines A. Climate change: challenges and  
554 opportunities for global health. *JAMA* 2014; **312**: 1565–80.
- 555 6 Alderman K, Turner LR, Tong SL. Floods and human health: A systematic review. *Environ*  
556 *Int* 2012; **47**: 37–47.
- 557 7 Coates SJ, Davis MDP, Andersen LK. Temperature and humidity affect the incidence of  
558 hand, foot, and mouth disease: a systematic review of the literature - a report from the  
559 International Society of Dermatology Climate Change Committee. *Int J Dermatol* 2019; **58**:  
560 388–99.
- 561 8 Duan C, Zhang X, Jin H, *et al.* Meteorological factors and its association with hand, foot  
562 and mouth disease in Southeast and East Asia areas: a meta-analysis. *Epidemiology &*  
563 *Infection* 2018; **147**: 1–18.
- 564 9 Babaie J, Barati M, Azizi M, Ephtekhari A, Sadat SJ. A systematic evidence review of the  
565 effect of climate change on malaria in Iran. *J Parasit Dis* 2018; **42**: 331–40.
- 566 10 Chua PL, Dorotan MM, Sigua JA, Estanislao RD, Hashizume M, Salazar MA. Scoping  
567 Review of Climate Change and Health Research in the Philippines: A Complementary Tool  
568 in Research Agenda-Setting. *Int J Environ Res Public Health* 2019; **16**.  
569 DOI:10.3390/ijerph16142624.
- 570 11 Lal A, Lill AW, McIntyre M, Hales S, Baker MG, French NP. Environmental change and  
571 enteric zoonoses in New Zealand: a systematic review of the evidence. *Aust N Z J Public*  
572 *Health* 2015; **39**: 63–8.
- 573 12 Li C, Lu Y, Liu J, Wu X. Climate change and dengue fever transmission in China:  
574 Evidences and challenges. *Sci Total Environ* 2018; **622-623**: 493–501.
- 575 13 Herlihy N, Bar-Hen A, Verner G, *et al.* Climate change and human health: what are the

- 1  
2  
3 576 research trends? A scoping review protocol. *BMJ Open* 2016; **6**: e012022.  
4  
5 577 14 Hosking J, Campbell-Lendrum D. How well does climate change and human health  
6 578 research match the demands of policymakers? A scoping review. *Environ Health Perspect*  
7 579 2012; **120**: 1076–82.  
8  
9  
10 580 15 Pollock M, Fernandes RM, Becker LA, Pieper D, Hartling L. Chapter V: Overviews of  
11 581 Reviews. In: Higgins JPT, Thomas J, Chandler J, Cumpston M, Li T, Page MJ, Welch VA,  
12 582 ed. *Cochrane Handbook for Systematic Reviews of Interventions* version 6.1 (updated  
13 583 September 2020). Cochrane, 2020.  
14  
15 584 16 Holly O, Witteman, Selma Chipenda Dansokho, Ruth Ndjaboue, Thierry Provencher, Rose-  
16 585 Alice Poulin-Rheault, Louann Poirier-Bergeron, Caroline Beaudoin, Catherine Fallon, Rhéa  
17 586 Rocque, Andrea Tricco. Climate change and human health: an overview of systematic  
18 587 reviews. 2019; published online Dec 4.  
19 588 [https://www.crd.york.ac.uk/PROSPERO/display\\_record.php?RecordID=145972](https://www.crd.york.ac.uk/PROSPERO/display_record.php?RecordID=145972) (accessed  
20 589 Aug 8, 2020).  
21  
22  
23 590 17 Page M, McKenzie J, Bossuyt P, *et al.* Updating the PRISMA reporting guideline for  
24 591 systematic reviews and meta-analyses. 2020. DOI:10.17605/OSF.IO/P93GE.  
25  
26 592 18 Pollock M, Fernandes RM, Pieper D, *et al.* Preferred Reporting Items for Overviews of  
27 593 Reviews (PRIOR): a protocol for development of a reporting guideline for overviews of  
28 594 reviews of healthcare interventions. *Syst Rev* 2019; **8**: 335.  
29  
30  
31 595 19 About Cochrane Reviews. <https://www.cochranelibrary.com/about/about-cochrane-reviews>  
32 596 (accessed Sept 14, 2020).  
33  
34 597 20 World Health Organization. Preamble to the Constitution of WHO as adopted by the  
35 598 International Health Conference. New York, 19 June - 22 July 1946 signed on 22 July 1946  
36 599 by the representatives of 61 States (Official Records of WHO, no. 2, p. 100) and entered  
37 600 into force on 7 April 1948. The definition has not been amended since 1948.  
38 601 [https://apps.who.int/gb/bd/pdf\\_files/BD\\_49th-en.pdf#page=7](https://apps.who.int/gb/bd/pdf_files/BD_49th-en.pdf#page=7).  
39  
40  
41 602 21 Covidence systematic review software. [www.covidence.org](http://www.covidence.org).  
42  
43 603 22 Watts N, Amann M, Arnell N, *et al.* The 2019 report of The Lancet Countdown on health  
44 604 and climate change: ensuring that the health of a child born today is not defined by a  
45 605 changing climate. *Lancet* 2019; **394**: 1836–78.  
46  
47 606 23 Boylan S, Beyer K, Schlosberg D, *et al.* A conceptual framework for climate change, health  
48 607 and wellbeing in NSW, Australia. *Public Health Res Pract* 2018; **28**.  
49 608 DOI:10.17061/phrp2841826.  
50  
51  
52 609 24 Amegah AK, Rezza G, Jaakkola JJ. Temperature-related morbidity and mortality in Sub-  
53 610 Saharan Africa: A systematic review of the empirical evidence. *Environ Int* 2016; **91**: 133–  
54 611 49.  
55  
56  
57  
58  
59  
60

- 1  
2  
3 612 25 Odame EA, Li Y, Zheng SM, Vaidyanathan A, Silver K. Assessing Heat-Related Mortality  
4 613 Risks among Rural Populations: A Systematic Review and Meta-Analysis of  
5 614 Epidemiological Evidence. *Int J Environ Res Public Health* 2018; **15**.  
6 615 DOI:10.3390/ijerph15081597.
- 8  
9 616 26 Leyva EWA, Beaman A, Davidson PM. Health Impact of Climate Change in Older People:  
10 617 An Integrative Review and Implications for Nursing. *J Nurs Scholarsh* 2017; **49**: 670–8.
- 12 618 27 Phalkey RK, Aranda-Jan C, Marx S, Hofle B, Sauerborn R. Systematic review of current  
13 619 efforts to quantify the impacts of climate change on undernutrition. *Proc Natl Acad Sci U S*  
14 620 *A* 2015; **112**: E4522–9.
- 16 621 28 Porpora MG, Piacenti I, Scaramuzzino S, Masciullo L, Rech F, Panici PB. Environmental  
17 622 contaminants exposure and preterm birth: A systematic review. *Toxics* 2019; **7**.  
18 623 DOI:10.3390/toxics7010011.
- 20 624 29 Bai L, Morton LC, Liu Q. Climate change and mosquito-borne diseases in China: a review.  
21 625 *Globalization & Health* 2013; **9**: 10–10.
- 23 626 30 Cheng J, Xu Z, Zhu R, *et al.* Impact of diurnal temperature range on human health: a  
24 627 systematic review. *Int J Biometeorol* 2014; **58**: 2011–24.
- 26 628 31 Phung D, Huang C, Rutherford S, Chu C, Wang X, Nguyen M. Climate Change, Water  
27 629 Quality, and Water-Related Diseases in the Mekong Delta Basin: A Systematic Review.  
28 630 *Asia Pac J Public Health* 2015; **27**: 265–76.
- 30 631 32 Klinger C, Landeg O, Murray V. Power Outages, Extreme Events and Health: A Systematic  
31 632 Review of the Literature from 2011-2012. *PLoS Curr* 2014.  
32 633 DOI:10.1371/currents.dis.04eb1dc5e73dd1377e05a10e9edde673.
- 34 634 33 Sun Z, Chen C, Xu D, Li T. Effects of ambient temperature on myocardial infarction: A  
35 635 systematic review and meta-analysis. *Environ Pollut* 2018; **241**: 1106–14.
- 37 636 34 Berhane K, Kumie A, Samet J. Health Effects of Environmental Exposures, Occupational  
38 637 Hazards and Climate Change in Ethiopia: Synthesis of Situational Analysis, Needs  
39 638 Assessment and the Way Forward. *Ethiopian Journal of Health Development* 2016; **30**: 50–  
40 639 6.
- 42 640 35 Bernhardt V, Finkelmeier F, Verhoff MA, Amendt J. Myiasis in humans-a global case  
43 641 report evaluation and literature analysis. *Parasitol Res* 2019; **118**: 389–97.
- 45 642 36 de Sousa TCM, Amancio F, Hacon SS, Barcellos C. [Climate-sensitive diseases in Brazil  
46 643 and the world: systematic review] Enfermedades sensibles al clima en Brasil y el mundo:  
47 644 revision sistematica. *Rev Panam Salud Publica* 2018; **42**: e85.
- 49 645 37 Dhimal M, Ahrens B, Kuch U. Climate Change and Spatiotemporal Distributions of Vector-  
50 646 Borne Diseases in Nepal--A Systematic Synthesis of Literature. *PLoS ONE [Electronic*  
51 647 *Resource]* 2015; **10**: e0129869.

- 1  
2  
3 648 38 Fan J, Wei W, Bai Z, *et al.* A systematic review and meta-analysis of dengue risk with  
4 649 temperature change. *Int J Environ Res Public Health* 2015; **12**: 1–15.
- 6 650 39 Gracia JR, Schumann B, Seidler A. Climate Variability and the Occurrence of Human  
7 651 Puumala Hantavirus Infections in Europe: A Systematic Review. *Zoonoses Public Health*  
8 652 2015; **62**: 465–78.
- 10  
11 653 40 Hedlund C, Blomstedt Y, Schumann B. Association of climatic factors with infectious  
12 654 diseases in the Arctic and subarctic region--a systematic review. *Glob Health Action* 2014;  
13 655 7: 24161.
- 15 656 41 Hii YL, Zaki RA, Aghamohammadi N, Rocklov J. Research on Climate and Dengue in  
16 657 Malaysia: A Systematic Review. *Current Environmental Health Reports* 2016; **3**: 81–90.
- 18 658 42 Khader YS, Abdelrahman M, Abdo N, *et al.* Climate change and health in the Eastern  
19 659 Mediterranean countries: a systematic review. *Rev Environ Health* 2015; **30**: 163–81.
- 21  
22 660 43 Matysiak A, Roess A. Interrelationship between Climatic, Ecologic, Social, and Cultural  
23 661 Determinants Affecting Dengue Emergence and Transmission in Puerto Rico and Their  
24 662 Implications for Zika Response. *J Trop Med* 2017; **2017**. DOI:10.1155/2017/8947067.
- 26 663 44 Naish S, Dale P, Mackenzie JS, McBride J, Mengersen K, Tong S. Climate change and  
27 664 dengue: a critical and systematic review of quantitative modelling approaches. *BMC Infect*  
28 665 *Dis* 2014; **14**: 167–167.
- 30  
31 666 45 Nichols A, Maynard V, Goodman B, Richardson J. Health, climate change and  
32 667 sustainability: a systematic review and thematic analysis of the literature. *Environ Health*  
33 668 *Insights* 2009; : 63–88.
- 35 669 46 Racloz V, Ramsey R, Tong S, Hu W. Surveillance of dengue fever virus: a review of  
36 670 epidemiological models and early warning systems. *PLoS Neglected Tropical Diseases*  
37 671 *[electronic resource]* 2012; **6**: e1648.
- 39  
40 672 47 Swynghedauw B. [Medical consequences of global warming]. *Presse Med* 2009; **38**: 551–  
41 673 61.
- 43 674 48 Waits A, Emelyanova A, Oksanen A, Abass K, Rautio A. Human infectious diseases and  
44 675 the changing climate in the Arctic. *Environ Int* 2018; **121**: 703–13.
- 46 676 49 Xu Z, Etzel RA, Su H, Huang C, Guo Y, Tong S. Impact of ambient temperature on  
47 677 children's health: a systematic review. *Environ Res* 2012; **117**: 120–31.
- 49  
50 678 50 Yu W, Mengersen K, Dale P, *et al.* Projecting Future Transmission of Malaria Under  
51 679 Climate Change Scenarios: Challenges and Research Needs. *Crit Rev Environ Sci Technol*  
52 680 2015; **45**: 777–811.
- 53  
54 681 51 Veenema TG, Thornton CP, Lavin RP, Bender AK, Seal S, Corley A. Climate Change-  
55 682 Related Water Disasters' Impact on Population Health. *J Nurs Scholarsh* 2017; **49**: 625–34.

- 1  
2  
3 683 52 Brown L, Murray V. Examining the relationship between infectious diseases and flooding  
4 684 in Europe: A systematic literature review and summary of possible public health  
5 685 interventions. *Disaster Health* 2013; **1**: 117–27.
- 6  
7  
8 686 53 Tall JA, Gatton ML, Tong S. Ross River Virus Disease Activity Associated With Naturally  
9 687 Occurring Nontidal Flood Events in Australia: A Systematic Review. *J Med Entomol* 2014;  
10 688 **51**: 1097–108.
- 11  
12 689 54 Ghazani M, FitzGerald G, Hu WB, Toloo G, Xu ZW. Temperature Variability and  
13 690 Gastrointestinal Infections: A Review of Impacts and Future Perspectives. *Int J Environ Res*  
14 691 *Public Health* 2018; **15**. DOI:10.3390/ijerph15040766.
- 15  
16 692 55 Gao J, Sun Y, Lu Y, Li L. Impact of ambient humidity on child health: a systematic review.  
17 693 *PLoS ONE [Electronic Resource]* 2014; **9**: e112508.
- 18  
19  
20 694 56 Lal A, Fearnley E, Wilford E. Local weather, flooding history and childhood diarrhoea  
21 695 caused by the parasite *Cryptosporidium* spp.: A systematic review and meta-analysis. *Sci*  
22 696 *Total Environ* 2019; **674**: 300–6.
- 23  
24 697 57 Levy K, Woster AP, Goldstein RS, Carlton EJ. Untangling the Impacts of Climate Change  
25 698 on Waterborne Diseases: a Systematic Review of Relationships between Diarrheal Diseases  
26 699 and Temperature, Rainfall, Flooding, and Drought. *Environ Sci Technol* 2016; **50**: 4905–22.
- 27  
28  
29 700 58 Philipsborn R, Ahmed SM, Brosi BJ, Levy K. Climatic Drivers of Diarrheagenic  
30 701 *Escherichia coli* Incidence: A Systematic Review and Meta-analysis. *J Infect Dis* 2016; **214**:  
31 702 6–15.
- 32  
33 703 59 Semenza JC, Herbst S, Rechenburg A, *et al.* Climate change impact assessment of food-  
34 704 and waterborne diseases. *Crit Rev Environ Sci Technol* 2012; **42**: 857–90.
- 35  
36 705 60 Stensgaard AS, Vounatsou P, Sengupta ME, Utzinger J. Schistosomes, snails and climate  
37 706 change: Current trends and future expectations. *Acta Trop* 2019; **190**: 257–68.
- 38  
39  
40 707 61 Welch K, Shipp-Hilts A, Eidson M, Saha S, Zansky S. Salmonella and the changing  
41 708 environment: systematic review using New York State as a model. *J Water Health* 2019;  
42 709 **17**: 179–95.
- 43  
44 710 62 Cann KF, Thomas DR, Salmon RL, Wyn-Jones AP, Kay D. Extreme water-related weather  
45 711 events and waterborne disease. *Epidemiology & Infection* 2013; **141**: 671–86.
- 46  
47  
48 712 63 Stanke C, Kerac M, Prudhomme C, Medlock J, Murray V. Health Effects of Drought: A  
49 713 Systematic Review of the Evidence. *PLoS Curr* 2013.  
50 714 DOI:10.1371/currents.dis.7a2cee9e980f91ad7697b570bcc4b004.
- 51  
52 715 64 Bunker A, Wildenhain J, Vandenberg A, *et al.* Effects of Air Temperature on Climate-  
53 716 Sensitive Mortality and Morbidity Outcomes in the Elderly; a Systematic Review and Meta-  
54 717 analysis of Epidemiological Evidence. *EBioMedicine* 2016; **6**: 258–68.

- 1  
2  
3 718 65 Campbell S, Remenyi TA, White CJ, Johnston FH. Heatwave and health impact research: A  
4 719 global review. *Health Place* 2018; **53**: 210–8.
- 6 720 66 Cunrui H, Barnett AG, Xiaoming W, Vaneckova P, FitzGerald G, Shilu T. Projecting  
7 721 Future Heat-Related Mortality under Climate Change Scenarios: A Systematic Review.  
8 722 *Environ Health Perspect* 2011; **119**: 1681–90.
- 11 723 67 Ghanizadeh G, Heidari M, Seifi B, Jafari H, Pakjoui S. The effect of climate change on  
12 724 cardiopulmonary disease—a systematic review. *J Clin Diagn Res* 2017; **11**: IE01–4.
- 14 725 68 Hajat S, Kosatky T. Heat-related mortality: a review and exploration of heterogeneity.  
15 726 *Journal of Epidemiology & Community Health* 2010; **64**: 753–60.
- 17 727 69 Lawton EM, Pearce H, Gabb GM. Review article: Environmental heatstroke and long-term  
18 728 clinical neurological outcomes: A literature review of case reports and case series 2000–  
19 729 2016. *Emerg Med Australas* 2019; **31**: 163–73.
- 22 730 70 Lian H, Ruan YP, Liang RJ, Liu XL, Fan ZJ. Short-Term Effect of Ambient Temperature  
23 731 and the Risk of Stroke: A Systematic Review and Meta-Analysis. *Int J Environ Res Public*  
24 732 *Health* 2015; **12**: 9068–88.
- 26 733 71 Moghadamnia MT, Ardalan A, Mesdaghinia A, Keshtkar A, Naddafi K, Yekaninejad MS.  
27 734 Ambient temperature and cardiovascular mortality: A systematic review and meta-analysis.  
28 735 *PeerJ* 2017; **2017**: 3574.
- 31 736 72 Salve HR, Parthasarathy R, Krishnan A, Pattanaik DR. Impact of ambient air temperature  
32 737 on human health in India. *Rev Environ Health* 2018; **33**: 433–9.
- 34 738 73 Sanderson M, Arbutnott K, Kovats S, Hajat S, Falloon P. The use of climate information  
35 739 to estimate future mortality from high ambient temperature: A systematic literature review.  
36 740 *PLoS ONE [Electronic Resource]* 2017; **12**: e0180369.
- 38 741 74 Witt C, Schubert AJ, Jehn M, *et al.* The Effects of Climate Change on Patients With  
39 742 Chronic Lung Disease. A Systematic Literature Review. *Dtsch Arztebl Int* 2015; **112**: 878–  
40 743 83.
- 43 744 75 Xu Z, Sheffield PE, Su H, Wang X, Bi Y, Tong S. The impact of heat waves on children’s  
44 745 health: a systematic review. *Int J Biometeorol* 2014; **58**: 239–47.
- 46 746 76 Xu Z, FitzGerald G, Guo Y, Jalaludin B, Tong S. Impact of heatwave on mortality under  
47 747 different heatwave definitions: A systematic review and meta-analysis. *Environ Int* 2016;  
48 748 **89-90**: 193–203.
- 51 749 77 Yu W, Mengersen K, Wang X, *et al.* Daily average temperature and mortality among the  
52 750 elderly: a meta-analysis and systematic review of epidemiological evidence. *Int J*  
53 751 *Biometeorol* 2012; **56**: 569–81.
- 55 752 78 Doocy S, Dick A, Daniels A, Kirsch TD. The Human Impact of Tropical Cyclones: A

- 1  
2  
3 753 Historical Review of Events 1980-2009 and Systematic Literature Review. *PLoS Curr*  
4 754 2013. DOI:10.1371/currents.dis.2664354a5571512063ed29d25ffbce74.  
5  
6 755 79 Madaniyazi L, Guo Y, Yu W, Tong S. Projecting future air pollution-related mortality  
7 756 under a changing climate: Progress, uncertainties and research needs. *Environ Int* 2015; **75**:  
8 757 21–32.  
9  
10  
11 758 80 Liu JC, Pereira G, Uhl SA, Bravo MA, Bell ML. A systematic review of the physical health  
12 759 impacts from non-occupational exposure to wildfire smoke. *Environ Res* 2015; **136**: 120–  
13 760 32.  
14  
15 761 81 Reid CE, Brauer M, Johnston FH, Jerrett M, Balme JR, Elliott CT. Critical Review of  
16 762 Health Impacts of Wildfire Smoke Exposure. *Environ Health Perspect* 2016; **124**: 1334–43.  
17  
18 763 82 Youssouf H, Liousse C, Roblou L, *et al.* Non-accidental health impacts of wildfire smoke.  
19 764 *International Journal of Environmental Research & Public Health [Electronic Resource]*  
20 765 2014; **11**: 11772–804.  
21  
22  
23 766 83 Lake IR, Jones NR, Agnew M, *et al.* Climate Change and Future Pollen Allergy in Europe.  
24 767 *Environ Health Perspect* 2017; **125**: 385–91.  
25  
26 768 84 Cong XW, Xu XJ, Zhang YL, Wang QH, Xu L, Huo X. Temperature drop and the risk of  
27 769 asthma: a systematic review and meta-analysis. *Environ Sci Pollut Res* 2017; **24**: 22535–46.  
28  
29  
30 770 85 Zuo J, Pullen S, Palmer J, Bennetts H, Chileshe N, Ma T. Impacts of heat waves and  
31 771 corresponding measures: a review. *J Clean Prod* 2015; **92**: 1–12.  
32  
33 772 86 Xu Z, Crooks JL, Davies JM, Khan AF, Hu W, Tong S. The association between ambient  
34 773 temperature and childhood asthma: a systematic review. *Int J Biometeorol* 2018; **62**: 471–  
35 774 81.  
36  
37 775 87 Sawatzky A, Cunsolo A, Jones-Bitton A, Middleton J, Harper SL. Responding to Climate  
38 776 and Environmental Change Impacts on Human Health via Integrated Surveillance in the  
39 777 Circumpolar North: A Systematic Realist Review. *International Journal of Environmental*  
40 778 *Research & Public Health [Electronic Resource]* 2018; **15**: 30.  
41  
42  
43 779 88 Wald A. Emergency Department Visits and Costs for Heat-Related Illness Due to Extreme  
44 780 Heat or Heat Waves in the United States: An Integrated Review. *Nurs Econ* 2019; **37**: 35–  
45 781 48.  
46  
47 782 89 Gao JJ, Cheng Q, Duan J, *et al.* Ambient temperature, sunlight duration, and suicide: A  
48 783 systematic review and meta-analysis. *Sci Total Environ* 2019; **646**: 1021–9.  
49  
50  
51 784 90 Benevolenza MA, DeRigne L. The impact of climate change and natural disasters on  
52 785 vulnerable populations: A systematic review of literature. *J Hum Behav Soc Environ* 2019;  
53 786 **29**: 266–81.  
54  
55 787 91 Rataj E, Kunzweiler K, Garthus-Niegel S. Extreme weather events in developing countries  
56  
57  
58  
59  
60

- 1  
2  
3 788 and related injuries and mental health disorders - a systematic review. *BMC Public Health*  
4 789 2016; **16**: 1020–1020.
- 5  
6 790 92 Fernandez A, Black J, Jones M, *et al.* Flooding and Mental Health: A Systematic Mapping  
7 791 Review. *PLoS ONE [Electronic Resource]* 2015; **10**. DOI:10.1371/journal.pone.0119929.
- 8  
9  
10 792 93 Vins H, Bell J, Saha S, Hess JJ. The Mental Health Outcomes of Drought: A Systematic  
11 793 Review and Causal Process Diagram. *International Journal of Environmental Research &*  
12 794 *Public Health [Electronic Resource]* 2015; **12**: 13251–75.
- 13  
14 795 94 Carolan-Olah M, Frankowska D. High environmental temperature and preterm birth: A  
15 796 review of the evidence. *Midwifery* 2014; **30**: 50–9.
- 16  
17 797 95 Kuehn L, McCormick S. Heat Exposure and Maternal Health in the Face of Climate  
18 798 Change. *International Journal of Environmental Research & Public Health [Electronic*  
19 799 *Resource]* 2017; **14**: 29.
- 20  
21  
22 800 96 Poursafa P, Keikha M, Kelishadi R. Systematic review on adverse birth outcomes of climate  
23 801 change. *J Res Med Sci* 2015; **20**: 397–402.
- 24  
25 802 97 Zhang YQ, Yu CH, Wang L. Temperature exposure during pregnancy and birth outcomes:  
26 803 An updated systematic review of epidemiological evidence. *Environ Pollut* 2017; **225**: 700–  
27 804 12.
- 28  
29  
30 805 98 An R, Ji M, Zhang S. Global warming and obesity: a systematic review. *Obes Rev* 2018; **19**:  
31 806 150–63.
- 32  
33 807 99 Vilcins D, Sly PD, Jagals P. Environmental Risk Factors Associated with Child Stunting: A  
34 808 Systematic Review of the Literature. *Annals of Global Health* 2018; **84**: 551–62.
- 35  
36 809 100 Huang KC, Weng HH, Yang TY, Chang TS, Huang TW, Lee MS. Distribution of Fatal  
37 810 *Vibrio Vulnificus* Necrotizing Skin and Soft-Tissue Infections: A Systematic Review and  
38 811 Meta-Analysis. *Medicine* 2016; **95**: e2627.
- 39  
40  
41 812 101 Augustin J, Franzke N, Augustin M, Kappas M. Does climate change affect the incidence of  
42 813 skin and allergic diseases in Germany? *J Dtsch Dermatol Ges* 2008; **6**: 632–8.
- 43  
44 814 102 Binazzi A, Levi M, Bonafede M, *et al.* Evaluation of the impact of heat stress on the  
45 815 occurrence of occupational injuries: Meta-analysis of observational studies. *Am J Ind Med*  
46 816 2019; **62**: 233–43.
- 47  
48  
49 817 103 Bonafede M, Marinaccio A, Asta F, Schifano P, Michelozzi P, Vecchi S. The association  
50 818 between extreme weather conditions and work-related injuries and diseases. A systematic  
51 819 review of epidemiological studies. *Annali Dell Istituto Superiore Di Sanita* 2016; **52**: 357–  
52 820 67.
- 53  
54 821 104 Flouris AD, Dinas PC, Ioannou LG, *et al.* Workers' health and productivity under  
55 822 occupational heat strain: a systematic review and meta-analysis. *The lancet Planetary*



- 1  
2  
3 823 *Health* 2018; **2**: e521–31.  
4
- 5 824 105 Levi M, Kjellstrom T, Baldasseroni A. Impact of climate change on occupational health and  
6 825 productivity: a systematic literature review focusing on workplace heat. *Medicina del*  
7 826 *Lavoro* 2018; **109**: 163–79.
- 8  
9  
10 827 106 Varghese BM, Hansen A, Bi P, Pisaniello D. Are workers at risk of occupational injuries  
11 828 due to heat exposure? A comprehensive literature review. *Saf Sci* 2018; **110**: 380–92.
- 12  
13 829 107 Wimalawansa SA, Wimalawansa SJ. Environmentally induced, occupational diseases with  
14 830 emphasis on chronic kidney disease of multifactorial origin affecting tropical countries.  
15 831 *Annals of Occupational and Environmental Medicine* 2016; **28**. DOI:10.1186/s40557-016-  
16 832 0119-y.
- 17  
18  
19 833 108 Zhang Y, Bi P, Hiller JE. Climate change and disability -- adjusted life years. *J Environ*  
20 834 *Health* 2007; **70**: 32–6.
- 21  
22 835 109 Park KY, Kim HJ, Ahn HS, Yim SY, Jun JB. Association between acute gouty arthritis and  
23 836 meteorological factors: An ecological study using a systematic review and meta-analysis.  
24 837 *Semin Arthritis Rheum* 2017; **47**: 369–75.
- 25  
26 838 110 Kampe EOI, Kovats S, Hajat S. Impact of high ambient temperature on unintentional  
27 839 injuries in high-income countries: a narrative systematic literature review. *BMJ Open* 2016;  
28 840 **6**. DOI:10.1136/bmjopen-2015-010399.
- 29  
30  
31 841 111 Rifkin DI, Long MW, Perry MJ. Climate change and sleep: A systematic review of the  
32 842 literature and conceptual framework. *Sleep Med Rev* 2018; **42**: 3–9.
- 33  
34 843 112 Clayton S. Climate anxiety: Psychological responses to climate change. *J Anxiety Disord*  
35 844 2020; **74**: 102263.
- 36  
37 845 113 Davenport L. Emotional Resiliency in the Era of Climate Change: A Clinician’s Guide.  
38 846 London: Jessica Kingsley Publishers, 2017.
- 39  
40  
41 847 114 Maibach EW, Nisbet M, Baldwin P, Akerlof K, Diao G. Reframing climate change as a  
42 848 public health issue: an exploratory study of public reactions. *BMC Public Health* 2010; **10**:  
43 849 299.
- 44  
45 850 115 Stoknes PE. What we think about when we try not to think about global warming: Toward a  
46 851 new psychology of climate action. *White River Junction, Vermont: Chelsea Green*  
47 852 *Publishing* 2015.
- 48  
49  
50 853 116 Ahmadi S, Schütte S, Herlihy N, Hemono M, Flahault A, Depoux A. Health as a Key  
51 854 Driver of Climate Change Communication. A Scoping Review. *Preprints* 2020;  
52 855 **2020100095**. DOI:10.20944/preprints202010.0095.v1.
- 53  
54 856 117 Adlong W, Dietsch E. Environmental education and the health professions: framing climate  
55 857 change as a health issue. *Environ Educ Res* 2015; **21**: 687–709.
- 56  
57  
58  
59  
60

- 1  
2  
3 858 118 Myers TA, Nisbet MC, Maibach EW, Leiserowitz AA. A public health frame arouses  
4 859 hopeful emotions about climate change. *Clim Change* 2012; **113**: 1105–12.  
5  
6 860 119 Costello A, Montgomery H, Watts N. Climate change: the challenge for healthcare  
7 861 professionals. *BMJ* 2013; **347**: f6060.  
8  
9 862 120 Gould S, Rudolph L. Challenges and Opportunities for Advancing Work on Climate  
10 863 Change and Public Health. *Int J Environ Res Public Health* 2015; **12**: 15649–72.  
11  
12 864 121 Yang L, Liu C, Hess J, Phung D, Huang C. Health professionals in a changing climate:  
13 865 protocol for a scoping review. *BMJ Open* 2019; **9**: e024451.  
14  
15  
16 866  
17  
18 867  
19  
20  
21  
22  
23  
24  
25  
26  
27  
28  
29  
30  
31  
32  
33  
34  
35  
36  
37  
38  
39  
40  
41  
42  
43  
44  
45  
46  
47  
48  
49  
50  
51  
52  
53  
54  
55  
56  
57  
58  
59  
60

## 868 Figure Legends

869

870 **Figure 1. The flow chart for included articles in this review.**

871

872 **Figure 2. Number of included systematic reviews by year of publication.**

873

874 **Figure 3. Number of publications according to geographic affiliation of the first author.**

875 \*Countries of origin within continents in frequency order (highest to lowest frequency) and

876 alphabetical: **Europe:** United-Kingdom (9), Germany (6), Italy (4), Sweden (4), Denmark (2),

877 France (2), Georgia (1), Greece (1) and Finland (1). **Australia:** All Australia. **Asia:** China (11),

878 Iran (4), India (1), Jordan (1), Korea (1), Nepal (1), Philippines (1), Taiwan (1). **North America:**

879 United-States (15), Canada (1). **Africa:** Ethiopia (1), Ghana (1). **South America:** Brazil (1).

880

881 **Figure 4. Summary of the combination of climate impact and health outcome**

882 **(frequencies).** *Note:* The total frequency for one category of health outcome could exceed the

883 number of publications included in this health outcome, since one publication could explore the

884 health impact according to more than one climate factor (e.g., one publication could explore

885 both the impact of extreme weather events and temperature on mental health.

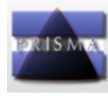

### PRISMA 2009 Flow Diagram

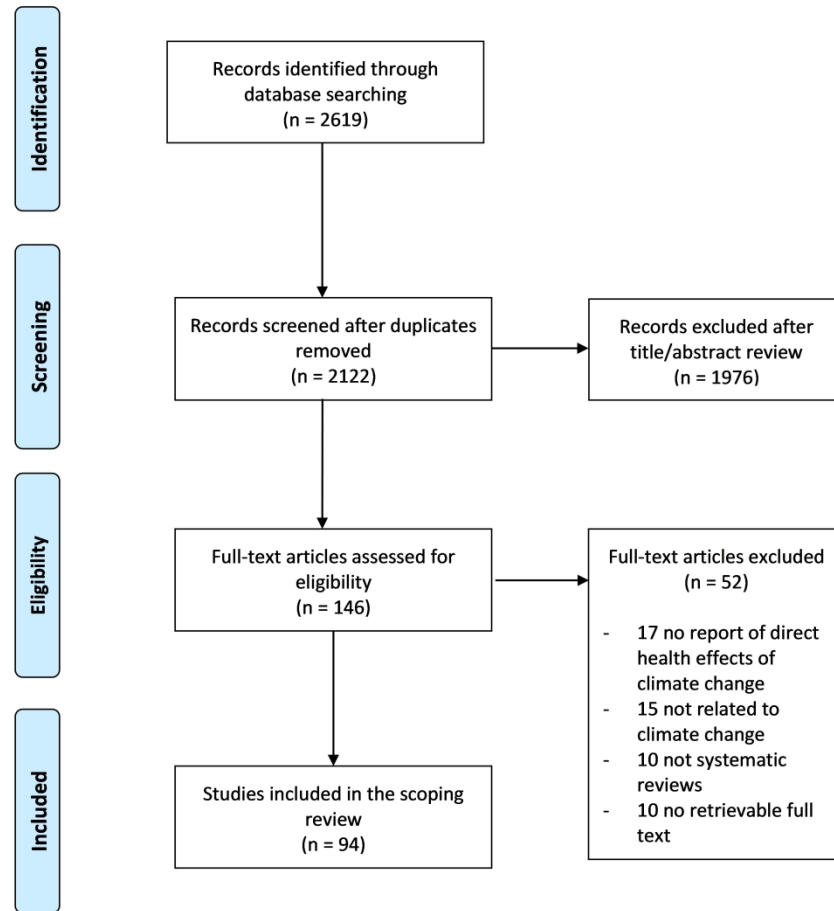

Figure 1. The flow chart for included articles in this review.

165x174mm (600 x 600 DPI)

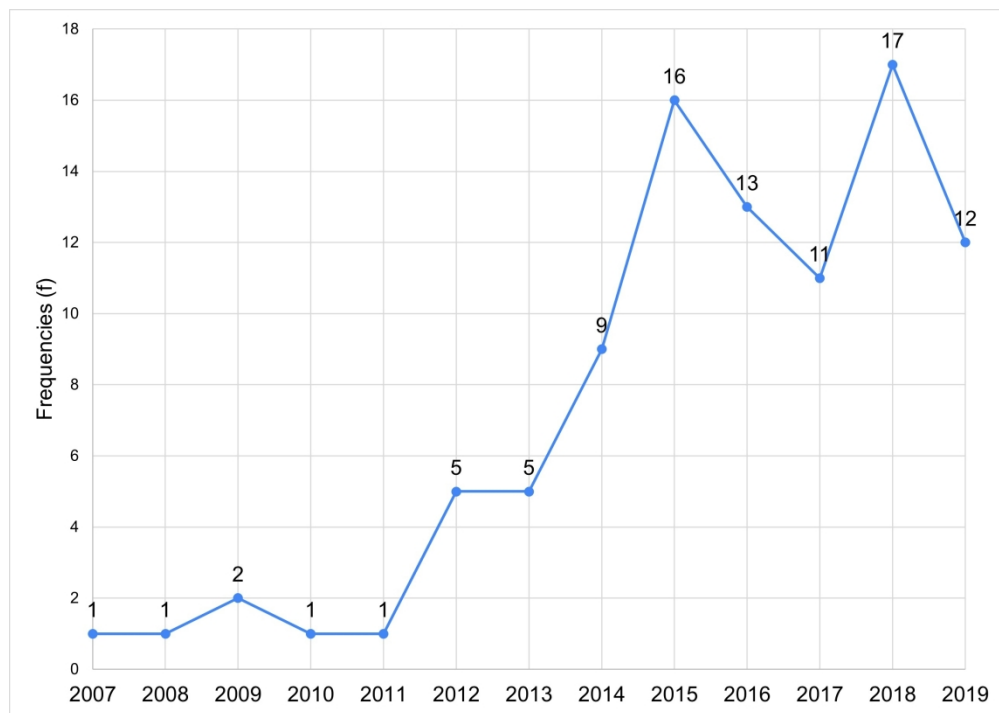

Figure 2. Number of included systematic reviews by year of publication.

199x141mm (330 x 330 DPI)

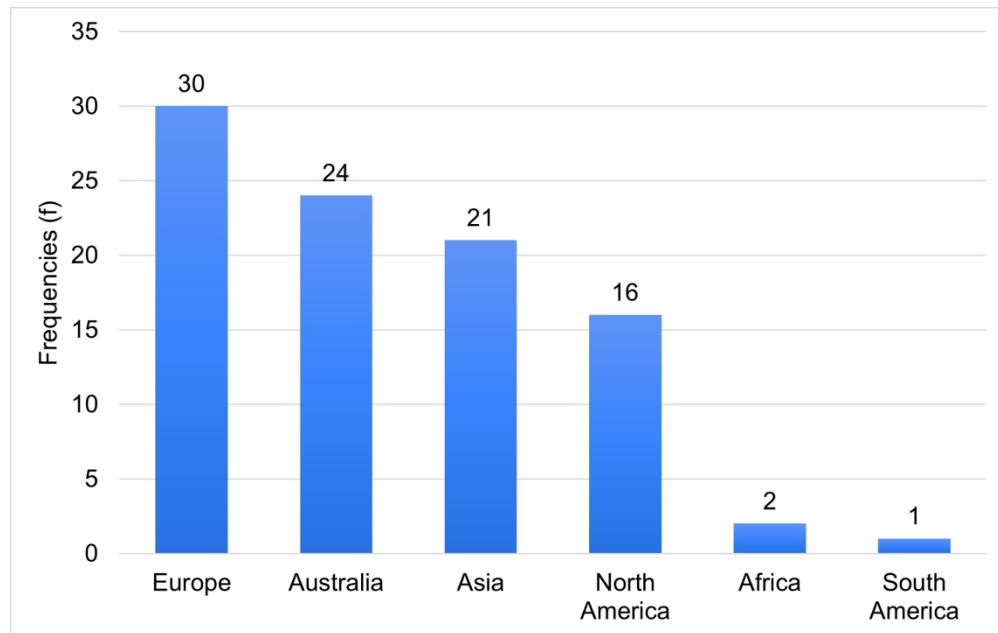

Figure 3. Number of publications according to geographic affiliation of the first author.

\*Countries of origin within continents in frequency order (highest to lowest frequency) and alphabetical: Europe: United-Kingdom (9), Germany (6), Italy (4), Sweden (4), Denmark (2), France (2), Georgia (1), Greece (1) and Finland (1). Australia: All Australia. Asia: China (11), Iran (4), India (1), Jordan (1), Korea (1), Nepal (1), Philippines (1), Taiwan (1). North America: United-States (15), Canada (1). Africa: Ethiopia (1), Ghana (1). South America: Brazil (1).

172x108mm (330 x 330 DPI)

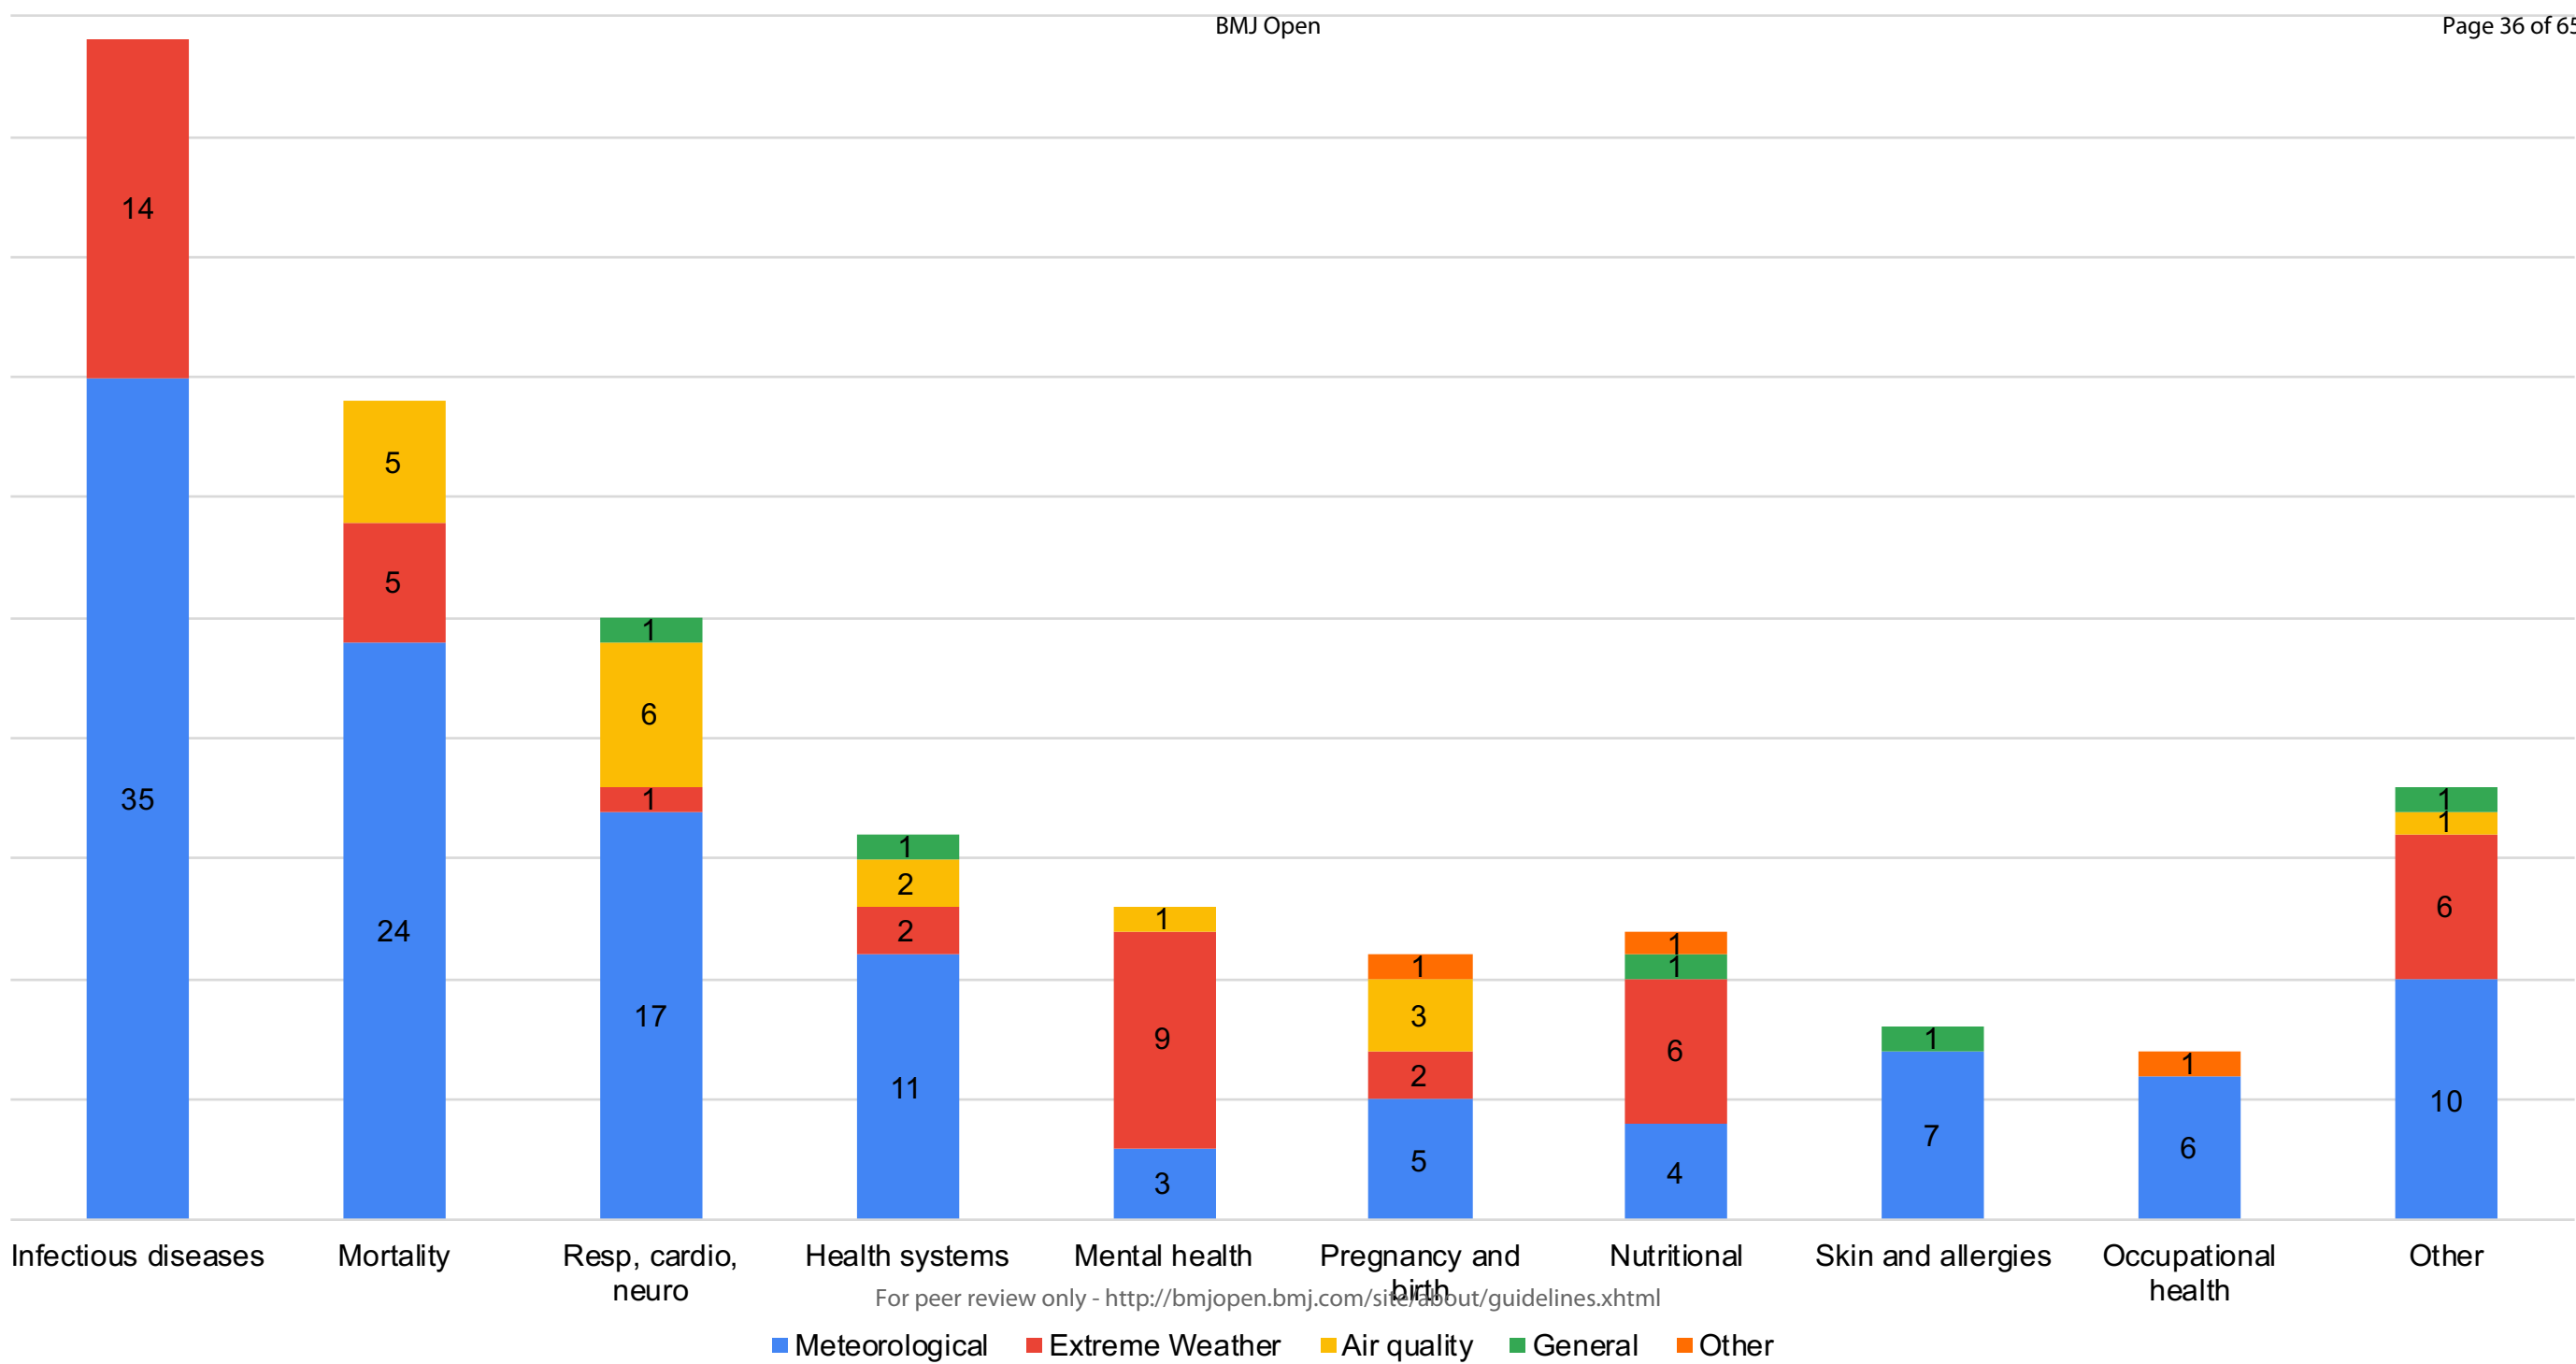

For peer review only - <http://bmjopen.bmj.com/site/about/guidelines.xhtml>

■ Meteorological ■ Extreme Weather ■ Air quality ■ General ■ Other

## Appendix 1. Search Strategy

Database: **MEDLINE (OVID)**

No database limit

| Concepts                                     | #  | Search strategy                                                 |
|----------------------------------------------|----|-----------------------------------------------------------------|
| Global Warming                               | 1  | exp Climate Change/                                             |
|                                              | 2  | "Global warming".ti,ab,kw                                       |
|                                              | 3  | "Climate Change?".ti,ab,kw                                      |
| Global Warming combined                      | 4  | or/1-3                                                          |
| Systematic review and meta-analysis          | 5  | exp Meta-Analysis as Topic/                                     |
|                                              | 6  | "Meta-Analysis"/                                                |
|                                              | 7  | Meta-Analysis.ti,ab,kw                                          |
|                                              | 8  | "meta analy*".ti,ab,kw                                          |
|                                              | 9  | metaanaly*.ti,ab,kw                                             |
|                                              | 10 | "Systematic Review"/                                            |
|                                              | 11 | "Systematic Reviews as Topic"/                                  |
|                                              | 12 | (systematic adj2 review).ti,ab,kw                               |
|                                              | 13 | (review adj1 ("selection criteria" OR "data extraction")).ti,ab |
| Systematic review and meta-analysis combined | 14 | or/5-13                                                         |
| Combination of concepts                      | 15 | 4 AND 14                                                        |



Database: **Embase.com**

No database limit

| Concepts                                     | #  | Search strategy                                                   |
|----------------------------------------------|----|-------------------------------------------------------------------|
| Global Warming                               | 1  | 'climate change'/de                                               |
|                                              | 2  | 'greenhouse effect'/de                                            |
|                                              | 3  | "Global warming":ti,ab,kw                                         |
|                                              | 4  | "Climate Change*":ti,ab,kw                                        |
| Global Warming combined                      | 5  | #1 OR #2 OR #3 OR #4                                              |
| Systematic review and meta-analysis          | 6  | 'meta analysis'/exp                                               |
|                                              | 7  | 'meta analysis (topic)'/de                                        |
|                                              | 8  | Meta-Analysis:ti,ab,kw                                            |
|                                              | 9  | "meta analy*":ti,ab,kw                                            |
|                                              | 10 | metaanaly*:ti,ab,kw                                               |
|                                              | 11 | 'systematic review'/de                                            |
|                                              | 12 | (systematic NEAR/2 review):ti,ab,kw                               |
|                                              | 13 | (review NEAR/2 ("selection criteria" OR "data extraction")):ti,ab |
| Systematic review and meta-analysis combined | 14 | #7 OR #8 OR #9 OR #10 OR #11 OR #12 OR #13 OR #14                 |

|                         |    |                                                       |
|-------------------------|----|-------------------------------------------------------|
| Combination of concepts | 15 | #14 AND #5                                            |
| Embase database only    | 16 | AND [embase]/lim NOT ([embase]/lim AND [medline]/lim) |

Database: **Web of Science**

Limit to: Science Citation Index Expanded (SCI-EXPANDED) and Emerging Sources Citation Index (ESCI) index only

| Concepts                                     | # | Search strategy                                                |
|----------------------------------------------|---|----------------------------------------------------------------|
| Global Warming                               | 1 | TS=("Global warming" OR "Climate Change\$")                    |
| Systematic review and meta-analysis          | 2 | TS=(Meta-Analysis)                                             |
|                                              | 3 | TS=("meta analy*")                                             |
|                                              | 4 | TS=(metaanaly*)                                                |
|                                              | 5 | TS=(systematic NEAR/2 review)                                  |
|                                              | 6 | TS=(review NEAR/1 ("selection criteria" OR "data extraction")) |
| Systematic review and meta-analysis combined | 7 | #6 OR #5 OR #4 OR #3 OR #2                                     |
| Combination of concepts                      | 8 | #7 AND #1                                                      |

Database: **CINAHL**

No database limit

| Concepts       | # | Search strategy     |
|----------------|---|---------------------|
| Global Warming | 1 | MH "Climate Change" |

|                                     |    |                                                            |
|-------------------------------------|----|------------------------------------------------------------|
|                                     | 2  | MH "Greenhouse Effect"                                     |
|                                     | 3  | TI "Global warming"                                        |
|                                     | 4  | TI "Climate Change?"                                       |
|                                     | 5  | AB "Global warming"                                        |
|                                     | 6  | AB "Climate Change?"                                       |
| Global Warming combined             | 7  | S1 OR S2 OR S3 OR S4 OR S5 OR S6                           |
| Systematic review and meta-analysis | 8  | MH "Meta Analysis"                                         |
|                                     | 9  | TI "Meta-Analysis"                                         |
|                                     | 10 | AB "Meta-Analysis"                                         |
|                                     | 11 | TI "meta analy**"                                          |
|                                     | 12 | AB "meta analy**"                                          |
|                                     | 13 | TI metaanaly*                                              |
|                                     | 14 | AB metaanaly*                                              |
|                                     | 15 | MH "Systematic Review"                                     |
|                                     | 16 | TI (systematic N2 review)                                  |
|                                     | 17 | AB (systematic N2 review)                                  |
|                                     | 18 | TI (review N1 ("selection criteria" OR "data extraction")) |
|                                     | 19 | AB (review N1 ("selection criteria" OR "data extraction")) |

1  
2  
3  
4  
5  
6  
7  
8  
9  
10  
11  
12  
13  
14  
15  
16  
17  
18  
19  
20  
21  
22  
23  
24  
25  
26  
27  
28  
29  
30  
31  
32  
33  
34  
35  
36  
37  
38  
39  
40  
41  
42  
43  
44  
45  
46  
47  
48  
49  
50  
51  
52  
53  
54  
55  
56  
57  
58  
59  
60

|                                              |    |                                                                                |
|----------------------------------------------|----|--------------------------------------------------------------------------------|
| Systematic review and meta-analysis combined | 20 | S8 OR S9 OR S10 OR S11 OR S12 OR S13 OR S14 OR S15 OR S16 OR S17 OR S18 OR S19 |
| Combination of concepts                      | 21 | S7 AND S20                                                                     |

For peer review only

**Appendix 2.** Summary of AMSTAR-2 items and modified AMSTAR-2 items.

| Topic # | AMSTAR-2 Original Items                                                                                                                                                                                                                                                                 | AMSTAR-2 Modifications                                                                                                                                                                                                                                                                                 |
|---------|-----------------------------------------------------------------------------------------------------------------------------------------------------------------------------------------------------------------------------------------------------------------------------------------|--------------------------------------------------------------------------------------------------------------------------------------------------------------------------------------------------------------------------------------------------------------------------------------------------------|
| 1       | <p>Did the research questions and inclusion criteria for the review include components of PICO?</p> <ul style="list-style-type: none"> <li>- Population</li> <li>- Intervention</li> <li>- Comparator group</li> <li>- Outcome</li> <li>- Timeframe for follow-up (optional)</li> </ul> | <p>“Population” became “Population and/or location”.</p> <p>“Intervention” became “Exposure”.</p> <p>The “Comparator group” category was taken out.</p> <p>A new section (#1.b)) was created, it includes “Definition of the exposure”, “Definition of the outcome” and “Timeframe for follow up”.</p> |
| 2       | <p>Did the report of the review contain an explicit statement that the review methods were established prior to the conduct of the review and did the report justify any significant deviations from the protocol?</p>                                                                  | <p>To score “yes”, a protocol must have been established before the review. There are no sub-criteria, you can only score yes or no.</p>                                                                                                                                                               |
| 3       | <p>Did the review authors explain their selection of the study designs for inclusion in the review?</p>                                                                                                                                                                                 | <p>If the study designs are specified, you score “partial yes”. They must be explained to score “yes”. No specific study design is required.</p>                                                                                                                                                       |
| 4       | <p>Did the review authors use a comprehensive literature search strategy?</p>                                                                                                                                                                                                           | <p>The “searched trial/study registries” category was taken out.</p> <p>Justified publication restrictions (e.g. language) moved from (partial yes) to (yes)</p>                                                                                                                                       |
| 5       | <p>Did the review authors perform study selection in duplicate?</p>                                                                                                                                                                                                                     | <p>No modifications.</p>                                                                                                                                                                                                                                                                               |
| 6       | <p>Did the review authors perform data extraction in duplicate?</p>                                                                                                                                                                                                                     | <p>No modifications.</p>                                                                                                                                                                                                                                                                               |
| 7       | <p>Did the review authors provide a list of excluded studies and justify the exclusion?</p>                                                                                                                                                                                             | <p>The explanation of the inclusion and exclusion criteria is evaluated.</p> <p>If there is only one out of the two, you score “partial yes”. The two must be explained to score “yes”.</p>                                                                                                            |
| 8       | <p>Did the review authors describe the included studies in adequate detail?</p>                                                                                                                                                                                                         | <p>“Populations” became “Populations and/or locations”.</p> <p>“Interventions” became “Exposures”.</p> <p>“Comparator groups” became “Comparator groups (if applicable)”.</p> <p>“Populations and/or locations”, “Exposures” and “Outcomes” must be described in details to score “yes”</p>            |
| 9       | <p>Did the review authors use a satisfactory technique for assessing the risk of bias (RoB) in individual studies that were included in the review?</p>                                                                                                                                 | <p>“RoB” became “limitations”. Instead of assessing the RoB, the review authors must have used a satisfactory technique for assessing the limitations in individual studies that were included in the review.</p>                                                                                      |

|    |                                                                                                                                                                                                        |                                                                                                                                                                                                  |
|----|--------------------------------------------------------------------------------------------------------------------------------------------------------------------------------------------------------|--------------------------------------------------------------------------------------------------------------------------------------------------------------------------------------------------|
| 10 | Did the review authors report on the sources of funding for the studies included in the review?                                                                                                        | No modifications.                                                                                                                                                                                |
| 11 | If meta-analysis was performed did the review authors use appropriate methods for statistical combination of results?                                                                                  | No modifications.                                                                                                                                                                                |
| 12 | If meta-analysis was performed, did the review authors assess the potential impact of RoBin individual studies on the results of the meta-analysis or other evidence synthesis                         | No modifications.                                                                                                                                                                                |
| 13 | Did the review authors account for RoB in individual studies when interpreting/discussing the results of the review?                                                                                   | “RoB” became “limitations”. Instead of accounting for RoB in individual studies, the review authors must have accounted for limitations when interpreting/ discussing the results of the review. |
| 14 | Did the review authors provide a satisfactory explanation for, and discussion of, any heterogeneity observed in the results of the review?                                                             | No modifications.                                                                                                                                                                                |
| 15 | If they performed quantitative synthesis did the review authors carry out an adequate investigation of publication bias (small study bias) and discuss its likely impact on the results of the review? | No modifications.                                                                                                                                                                                |
| 16 | Did the review authors report any potential sources of conflict of interest, including any funding they received for conducting the review?                                                            | No modifications.                                                                                                                                                                                |

**Appendix 3.** Overview of included studies (N=94) according to study characteristics and summary of climate impacts on health outcomes. Studies are presented in alphabetical order according to the first author's last name.

|   | First Author | Year | Country       | Years of included publications | Years of the studies included in the reviews | # of articles | Meta-analysis | Specific Area of focus | Specific Population of interest | Climate Impact  | Health Outcome                                                                                                                                             | Summary of findings                                                                                                                                                                                                                                                     |
|---|--------------|------|---------------|--------------------------------|----------------------------------------------|---------------|---------------|------------------------|---------------------------------|-----------------|------------------------------------------------------------------------------------------------------------------------------------------------------------|-------------------------------------------------------------------------------------------------------------------------------------------------------------------------------------------------------------------------------------------------------------------------|
| 1 | Alderman     | 2012 | Australia     | 2004-2011                      | 1931-2007                                    | 35            | No            |                        |                                 | Extreme weather | Infectious diseases<br>Mortality<br>Health systems<br>Mental health<br>Pregnancy and birth<br>Other                                                        | Floods are associated with infectious diseases (water- and vector-borne diseases), mortality (e.g., drowning), exacerbation of chronic illnesses, mental health issues (e.g., PTSD), hospital admissions, pregnancy outcomes and injuries.                              |
| 2 | Amegah       | 2016 | Ghana         | 1995-2014                      | 1960-2010                                    | 23            | No            | Sub-saharan Africa     |                                 | Meteorological  | Infectious diseases<br>Mortality<br>Respiratory, cardiovascular, and neurological outcomes<br>Health systems<br>Nutritional<br>Skin diseases and allergies | Temperature and temperature variability are suggested to be associated with infectious diseases, such as Ebola, cardiovascular diseases, mortality, cholera outbreaks, meningitis, undernutrition in children, respiratory outcomes, such as asthma, and skin diseases. |
| 3 | An           | 2018 | United States | 2002-2017                      | 2002-2016                                    | 50            | No            |                        |                                 | General         | Nutritional                                                                                                                                                | Climate change is associated with obesity. This association can be explained in 4 ways, such that climate change may impact obesity, obesity may impact climate change, both factors may be associated with common causes, or both factors may influence each other.    |

|    |             |      |               |           |           |     |     |          |                        |                                   |                                               |                                                                                                                                                                                                                       |
|----|-------------|------|---------------|-----------|-----------|-----|-----|----------|------------------------|-----------------------------------|-----------------------------------------------|-----------------------------------------------------------------------------------------------------------------------------------------------------------------------------------------------------------------------|
| 4  | Augustin    | 2008 | Germany       | 1996-2006 | NS        | 320 | No  | Germany  |                        | Meteorological                    | Skin diseases and allergies                   | Although skin and allergic diseases are climate sensitive, there is not sufficient evidence to suggest a prediction concerning skin and allergic diseases linked to climate change in Germany.                        |
| 5  | Babaie      | 2018 | Iran          | 2007-2017 | 1970-2015 | 14  | No  | Iran     |                        | Meteorological                    | Infectious diseases                           | Temperature, precipitation and humidity are associated with the risk of transmission of Malaria.                                                                                                                      |
| 6  | Bai         | 2013 | China         | 1995-2011 | 1951-2010 | 57  | No  | China    |                        | Meteorological                    | Infectious diseases                           | Variability in temperature, precipitation and wind are associated with the risk of transmission of mosquito-borne diseases.                                                                                           |
| 7  | Benevolenza | 2019 | United States | 2006-2017 | 2005-2015 | 13  | No  |          | Vulnerable populations | Extreme weather                   | Mental health<br>Pregnancy and birth<br>Other | Extreme weather events are associated with an exacerbation of pre-existing chronic health conditions, mental health issues (e.g., PTSD, isolation) and adverse birth outcomes.                                        |
| 8  | Berhane     | 2016 | Ethiopia      | NS        | NS        | 23  | No  | Ethiopia |                        | Meteorological<br>Extreme weather | Infectious diseases<br>Nutritional            | Meteorological factors and extreme weather events are associated with under- and mal- nutrition and the increased risk of climate sensitive infectious diseases (e.g., malaria, diarrhea, zoonotic infections, etc.). |
| 9  | Bernhardt   | 2019 | Germany       | 1997-2017 | NS        | 464 | No  |          |                        | Meteorological                    | Infectious diseases                           | Rising temperatures are predicted to be associated with myiasis in the future.                                                                                                                                        |
| 10 | Binazzi     | 2019 | Italy         | NS        | 1994-2013 | 8   | Yes |          | Workers                | Meteorological                    | Occupational health and injuries              | High temperatures are positively associated with occupational injuries.                                                                                                                                               |
| 11 | Bonafede    | 2016 | Italy         | 2000-2014 | 1985-2010 | 8   | No  |          | Workers                | Meteorological                    | Occupational health and injuries              | Extreme temperature (particularly heat) is associated with occupational injuries.                                                                                                                                     |



|    |              |      |                |           |           |     |     |        |                           |                 |                                                                                                                       |                                                                                                                                                                                                                |
|----|--------------|------|----------------|-----------|-----------|-----|-----|--------|---------------------------|-----------------|-----------------------------------------------------------------------------------------------------------------------|----------------------------------------------------------------------------------------------------------------------------------------------------------------------------------------------------------------|
| 12 | Brown        | 2013 | United Kingdom | 2004-2012 | 1975-2012 | 38  | No  | Europe |                           | Extreme weather | Infectious diseases                                                                                                   | Floods are associated with infectious diseases, including water-, rodent- and vector-borne diseases (from weeks to months after flooding).                                                                     |
| 13 | Bunker       | 2016 | Germany        | 1995-2015 | 1974-2013 | 61  | Yes |        | Elderly                   | Meteorological  | Mortality<br>Respiratory, cardiovascular, and neurological outcomes<br>Other                                          | Higher and lower temperatures are associated with cardiovascular and respiratory morbidity and mortality. Heat is also associated with diabetes and genitourinary infections.                                  |
| 14 | Campbell     | 2018 | Australia      | 1964-2017 | NS        | 188 | No  |        |                           | Meteorological  | Mortality<br>Health systems                                                                                           | Most studies exploring the heat impacts on health focus on mortality outcomes, followed by hospital admissions and ambulance call outs.                                                                        |
| 15 | Cann         | 2013 | United Kingdom | 1973-2010 | NS        | 83  | No  |        |                           | Extreme weather | Infectious diseases                                                                                                   | Extreme water-related events are associated with outbreaks of water-related infectious diseases.                                                                                                               |
| 16 | Carolan-Olah | 2014 | Australia      | 1997-2012 | 1988-2009 | 7   | No  |        |                           | Meteorological  | Pregnancy and birth                                                                                                   | High temperatures are associated with preterm birth.                                                                                                                                                           |
| 17 | Cheng        | 2014 | China          | 1990-2013 | 1941-2012 | 25  | No  |        | Adults, Elderly, Children | Meteorological  | Infectious diseases<br>Mortality<br>Respiratory, cardiovascular, and neurological outcomes<br>Health systems<br>Other | Diurnal temperature range is associated with mortality and cardiovascular and respiratory outcomes, hospital admissions, and Hand Foot Mouth disease in children and genitourinary outcomes among the elderly. |
| 18 | Coates       | 2019 | Denmark        | 2003-2018 | NS        | 72  | No  |        |                           | Meteorological  | Infectious diseases                                                                                                   | Some meteorological factors (temperature, humidity) are positively associated with Hand Foot Mouth disease (HFMD). Precipitation, wind speed and sunshine are not associated with HFMD.                        |

|    |           |      |               |           |           |     |     |                         |  |                 |                                                                               |                                                                                                                                                                                                                                                                    |
|----|-----------|------|---------------|-----------|-----------|-----|-----|-------------------------|--|-----------------|-------------------------------------------------------------------------------|--------------------------------------------------------------------------------------------------------------------------------------------------------------------------------------------------------------------------------------------------------------------|
| 19 | Cong      | 2017 | China         | 1994-2015 | 1982-2013 | 26  | Yes |                         |  | Meteorological  | Respiratory, cardiovascular, and neurological outcomes                        | Temperature drop is associated with asthma.                                                                                                                                                                                                                        |
| 20 | Cunrui    | 2011 | Australia     | 1997-2010 | 1961-2100 | 14  | No  |                         |  | Meteorological  | Mortality                                                                     | Higher temperature is associated with heat-related mortality.                                                                                                                                                                                                      |
| 21 | deSousa   | 2018 | Brazil        | 1976-2016 | NS        | 106 | No  |                         |  | Meteorological  | Infectious diseases<br>Respiratory, cardiovascular, and neurological outcomes | Meteorological factors (e.g., temperature, precipitation) are associated with infectious diseases (e.g., dengue, malaria) and cardiovascular and respiratory outcomes.                                                                                             |
| 22 | Dhimal    | 2015 | Nepal         | 1956-2014 | 1948-2098 | 50  | No  | Nepal                   |  | Meteorological  | Infectious diseases                                                           | Higher temperatures are associated with the distribution of vector-borne diseases.                                                                                                                                                                                 |
| 23 | Doocy     | 2013 | United States | 1975-2011 | 1974-2008 | 60  | No  |                         |  | Extreme weather | Mortality<br>Other                                                            | Cyclones are associated with mortality (e.g., drowning) and injuries.                                                                                                                                                                                              |
| 24 | Duan      | 2019 | China         | 2010-2018 | 2000-2016 | 51  | Yes | Southeast and East Asia |  | Meteorological  | Infectious diseases                                                           | Some meteorological factors (mean maximum temperature, rainfall, humidity and sunshine) are positively associated with Hand Foot Mouth disease (HFMD), whereas air pressure is negatively associated with this disease and wind speed is not associated with HFMD. |
| 25 | Fan       | 2015 | China         | 2004-2013 | 1985-2012 | 33  | Yes |                         |  | Meteorological  | Infectious diseases                                                           | Temperature is positively associated with transmission and incidence of Dengue.                                                                                                                                                                                    |
| 26 | Fernandez | 2015 | Australia     | 1995-2014 | NS        | 83  | No  |                         |  | Extreme weather | Mental health                                                                 | Floods are associated with negative mental health outcomes (e.g., PTSD, increased anxiety, depression, use of psychotropic medication). Conflicting evidence concerning suicide,                                                                                   |

|    |            |      |                |           |           |     |     |        |          |                |                                                                                                              |                                                                                                                                                                                 |
|----|------------|------|----------------|-----------|-----------|-----|-----|--------|----------|----------------|--------------------------------------------------------------------------------------------------------------|---------------------------------------------------------------------------------------------------------------------------------------------------------------------------------|
|    |            |      |                |           |           |     |     |        |          |                |                                                                                                              | tobacco, alcohol and substance abuse.                                                                                                                                           |
| 27 | Flouris    | 2018 | Greece         | 1954-2018 | NS        | 111 | Yes |        | Workers  | Meteorological | Occupational health and injuries                                                                             | High temperatures are positively associated with occupational heat strains, dehydration, kidney diseases and injuries.                                                          |
| 28 | Gao        | 2019 | China          | 1994-2018 | 1969-2015 | 16  | Yes |        |          | Meteorological | Mental health                                                                                                | Temperature increase is associated with suicide. No association between sunlight duration and suicide.                                                                          |
| 29 | Gao        | 2014 | China          | 1996-2012 | 1971-2010 | 37  | No  |        | Children | Meteorological | Infectious diseases<br>Respiratory, cardiovascular, and neurological outcomes<br>Skin diseases and allergies | Ambient humidity is associated with gastrointestinal, respiratory and allergic diseases in children.                                                                            |
| 30 | Ghanizadeh | 2017 | Iran           | 2009-2016 | 1990-2015 | 13  | No  |        |          | Meteorological | Mortality<br>Respiratory, cardiovascular, and neurological outcomes                                          | Meteorological factors, such as temperature and humidity, are associated with cardiopulmonary health. Cold temperatures are also associated with mortality from heart diseases. |
| 31 | Ghazani    | 2018 | Australia      | 2006-2017 | 1991-2011 | 11  | No  |        |          | Meteorological | Infectious diseases                                                                                          | Higher temperature is associated with bacterial gastrointestinal infections. Humidity and rainfall may influence this association.                                              |
| 32 | Gracia     | 2015 | Sweden         | 2003-2011 | 1959-2008 | 9   | No  | Europe |          | Meteorological | Infectious diseases                                                                                          | Temperature is positively associated with Human Puumala Hantavirus in some regions of Europe. Results concerning precipitation and humidity are contradictory or null.          |
| 33 | Hajat      | 2010 | United Kingdom | 1994-2008 | 1973-2003 | 11  | No  |        |          | Meteorological | Mortality                                                                                                    | Ambient heat is associated with mortality.                                                                                                                                      |

|    |         |      |                |           |           |    |     |                       |                        |                                                  |                                                                                                                                                                     |                                                                                                                                                                                                                                                                                                                                                                                                                                                                                                 |
|----|---------|------|----------------|-----------|-----------|----|-----|-----------------------|------------------------|--------------------------------------------------|---------------------------------------------------------------------------------------------------------------------------------------------------------------------|-------------------------------------------------------------------------------------------------------------------------------------------------------------------------------------------------------------------------------------------------------------------------------------------------------------------------------------------------------------------------------------------------------------------------------------------------------------------------------------------------|
| 34 | Hedlund | 2014 | Sweden         | 1970-2012 | 1750-2009 | 29 | No  | Arctic, sub-Arctic    | Vulnerable populations | Meteorological<br>Extreme weather                | Infectious diseases                                                                                                                                                 | Higher temperatures and flooding are associated with food- and water-borne diseases. This association is weaker for vector- and rodent-borne diseases. Air temperature and humidity seem to be associated with air-borne diseases.                                                                                                                                                                                                                                                              |
| 35 | Hii     | 2016 | Sweden         | 2007-2015 | 2003-2012 | 9  | No  | Malaysia              |                        | Meteorological                                   | Infectious diseases                                                                                                                                                 | Some meteorological factors (temperature, rainfall and humidity) are associated with Dengue, although these associations are inconsistent at times.                                                                                                                                                                                                                                                                                                                                             |
| 36 | Huang   | 2016 | Taiwan         | 1990-2014 | 1978-2011 | 19 | Yes |                       |                        | General                                          | Skin diseases and allergies                                                                                                                                         | Climate change, in general, may be associated with skin and soft-tissue infections.                                                                                                                                                                                                                                                                                                                                                                                                             |
| 37 | Kampe   | 2016 | United Kingdom | 1998-2015 | 1971-2010 | 13 | No  | High-income countries |                        | Meteorological                                   | Other                                                                                                                                                               | Higher temperature is associated with unintentional injuries.                                                                                                                                                                                                                                                                                                                                                                                                                                   |
| 38 | Khader  | 2015 | Jordan         | 2003-2014 | 1991-2012 | 78 | No  | Eastern Mediterranean | Vulnerable countries   | Meteorological<br>Extreme weather<br>Air quality | Infectious diseases<br>Mortality<br>Respiratory, cardiovascular, and neurological outcomes<br>Health systems<br>Mental health<br>Pregnancy and birth<br>Nutritional | High temperature is associated with mortality. Temperature, humidity and precipitation are associated with vector-, food- and water-borne diseases. Air pollution is associated with respiratory outcomes, although some findings are inconsistent. Higher temperature is associated with mental health outcomes and hospital admissions. Higher temperature may also be associated with adverse birth outcomes. Meteorological and extreme weather events are associated with food insecurity. |
| 39 | Klinger | 2014 | United Kingdom | 2011-2013 | NS        | 20 | No  |                       |                        | Extreme weather                                  | Health systems                                                                                                                                                      | Extreme weather events may lead to power outages which may pose challenges to healthcare quality.                                                                                                                                                                                                                                                                                                                                                                                               |

|    |        |      |                |           |           |     |     |             |                 |                                                  |                                                                      |                                                                                                                                                                                                                                 |
|----|--------|------|----------------|-----------|-----------|-----|-----|-------------|-----------------|--------------------------------------------------|----------------------------------------------------------------------|---------------------------------------------------------------------------------------------------------------------------------------------------------------------------------------------------------------------------------|
| 40 | Kuehn  | 2017 | United States  | 2002-2017 | NS        | 28  | No  |             | Pregnant people | Meteorological                                   | Pregnancy and birth                                                  | Extreme heat exposure is associated with adverse birth outcomes (e.g. stillbirth, birth weight).                                                                                                                                |
| 41 | Lake   | 2017 | United Kingdom | NS        | NS        | 66  | No  | Europe      |                 | General                                          | Respiratory, cardiovascular, and neurological outcomes               | Climate change may be associated with ragweed pollen allergy.                                                                                                                                                                   |
| 42 | Lal    | 2019 | Australia      | 1982-2011 | NS        | 36  | Yes |             | Children        | Meteorological                                   | Infectious diseases                                                  | Rainfall is associated with childhood diarrhea, although this association differed according to season and latitude.                                                                                                            |
| 43 | Lal    | 2015 | Australia      | NS        | NS        | 16  | No  | New Zealand |                 | Meteorological                                   | Infectious diseases                                                  | Temperature variability, higher temperature and rainfall are associated with enteric diseases.                                                                                                                                  |
| 44 | Lawton | 2019 | Australia      | 2000-2015 | NS        | 71  | No  |             |                 | Meteorological                                   | Mortality<br>Respiratory, cardiovascular, and neurological outcomes  | Heat exposure is associated with heat stroke, long-term neurological outcomes (e.g., cerebellar injury) and heat-related mortality.                                                                                             |
| 45 | Levi   | 2018 | Italy          | 2003-2017 | 1977-2014 | 184 | No  |             | Workers         | Meteorological                                   | Occupational health and injuries                                     | Heat exposure is associated with occupational injuries.                                                                                                                                                                         |
| 46 | Levy   | 2016 | United States  | 1972-2013 | 1948-2010 | 208 | No  |             |                 | Meteorological<br>Extreme weather                | Infectious diseases                                                  | Temperature is associated with bacterial diarrhea and drought is associated with all-cause diarrhea, although few studies explored the association between drought and diarrhea.                                                |
| 47 | Leyva  | 2017 | Asia           | 2009-2017 | NS        | 30  | No  |             | Elderly         | Meteorological<br>Extreme weather<br>Air quality | Infectious diseases<br>Mortality<br>Respiratory, cardiovascular, and | Meteorological factors, extreme weather events (e.g. typhoon, floods) and air pollution are associated with mortality and morbidity, especially cardiovascular- and respiratory-specific. Higher temperature is associated with |

1  
2  
3  
4  
5  
6  
7  
8  
9  
10  
11  
12  
13  
14  
15  
16  
17  
18  
19  
20  
21  
22  
23  
24  
25  
26  
27  
28  
29  
30  
31  
32  
33  
34  
35  
36  
37  
38  
39  
40  
41  
42  
43  
44  
45  
46  
47

|    |            |      |               |           |           |    |     |                             |  |                                   |                                                                                                                       |                                                                                                                                                                                                                                                                                 |
|----|------------|------|---------------|-----------|-----------|----|-----|-----------------------------|--|-----------------------------------|-----------------------------------------------------------------------------------------------------------------------|---------------------------------------------------------------------------------------------------------------------------------------------------------------------------------------------------------------------------------------------------------------------------------|
|    |            |      |               |           |           |    |     |                             |  |                                   | neurological outcomes<br>Health systems<br>Mental health                                                              | vector-borne diseases. Heat and cold temperatures are associated with hospital admissions. Flooding is associated with mental health outcomes (e.g. PTSD, depression).                                                                                                          |
| 48 | Li         | 2018 | China         | 1988-2017 | NS        | 81 | No  | China                       |  | Meteorological<br>Extreme weather | Infectious diseases                                                                                                   | Meteorological factors (temperature, precipitation, humidity, air pressure) and extreme weather events (floods, typhoons) are associated with Dengue fever in China.                                                                                                            |
| 49 | Lian       | 2015 | China         | 2003-2014 | NS        | 20 | Yes |                             |  | Meteorological                    | Mortality<br>Respiratory, cardiovascular, and neurological outcomes                                                   | Higher and lower temperatures are associated with stroke-related mortality and low temperatures are also associated with stroke-related morbidities.                                                                                                                            |
| 50 | Liu        | 2015 | United States | 1990-2014 | NS        | 61 | No  |                             |  | Air quality                       | Mortality<br>Respiratory, cardiovascular, and neurological outcomes<br>Health systems<br>Pregnancy and birth<br>Other | Wildfire smoke exposure is associated with mortality, respiratory outcomes and hospital admissions. Wildfire smoke exposure could also be associated with cardiovascular, ophthalmic and pregnancy outcomes, although more research is needed.                                  |
| 51 | Madaniyazi | 2015 | Australia     | 2004-2013 | 1961-2100 | 15 | No  |                             |  | Air quality                       | Mortality                                                                                                             | Air pollution is associated with future mortality.                                                                                                                                                                                                                              |
| 52 | Matysiak   | 2017 | Puerto Rico   | 2001-2005 | NS        | 26 | No  | Puerto Rico (United-States) |  | Meteorological<br>Extreme weather | Infectious diseases                                                                                                   | Meteorological factors (higher temperature and increased rainfall) are associated with vector-borne diseases, such as Dengue and Zika. Extreme weather events are less researched, but the few studies investigating this association suggest no association between hurricanes |

|    |              |      |                |           |           |    |     |                                |                   |                                                  |                                                                                                                                                                    |                                                                                                                                                                                                                                                                                                                                                                                            |
|----|--------------|------|----------------|-----------|-----------|----|-----|--------------------------------|-------------------|--------------------------------------------------|--------------------------------------------------------------------------------------------------------------------------------------------------------------------|--------------------------------------------------------------------------------------------------------------------------------------------------------------------------------------------------------------------------------------------------------------------------------------------------------------------------------------------------------------------------------------------|
|    |              |      |                |           |           |    |     |                                |                   |                                                  |                                                                                                                                                                    | and floods and vector-borne diseases.                                                                                                                                                                                                                                                                                                                                                      |
| 53 | Moghaddamnia | 2017 | Iran           | 2011-2016 | 1979-2013 | 26 | Yes |                                |                   | Meteorological                                   | Mortality                                                                                                                                                          | Higher and lower temperature are associated with cardiovascular mortality.                                                                                                                                                                                                                                                                                                                 |
| 54 | Naish        | 2014 | Australia      | NS        | 1931-2010 | 16 | No  |                                |                   | Meteorological                                   | Infectious diseases                                                                                                                                                | Meteorological factors (especially temperature, rainfall and humidity) are associated with Dengue.                                                                                                                                                                                                                                                                                         |
| 55 | Nichols      | 2009 | United Kingdom | 1999-2008 | NS        | 36 | No  |                                |                   | Meteorological<br>Extreme weather<br>Air quality | Infectious diseases<br>Mortality<br>Respiratory, cardiovascular, and neurological outcomes<br>Mental health<br>Nutritional<br>Skin diseases and allergies<br>Other | Meteorological factors (e.g., higher temperature) are associated with mortality and various infectious diseases. Increased UV exposure is associated with skin cancer and cataracts. Extreme weather events are associated with mortality, injury, mental health outcomes, malnutrition, and food- and water-borne diseases. Air pollution is associated with cardio-respiratory outcomes. |
| 56 | Odame        | 2018 | United States  | 2006-2017 | 1893-2013 | 14 | Yes |                                | Rural populations | Meteorological                                   | Mortality                                                                                                                                                          | Higher temperature is associated with all-cause mortality and cardiovascular specific mortality.                                                                                                                                                                                                                                                                                           |
| 57 | Park         | 2017 | Korea          | 1920-2015 | 1961-2013 | 10 | Yes |                                |                   | Meteorological                                   | Other                                                                                                                                                              | Higher temperature is associated with acute gouty arthritis.                                                                                                                                                                                                                                                                                                                               |
| 58 | Phalkey      | 2015 | Germany        | 1989-2012 | 1982-2008 | 15 | No  | Low to middle-income countries | Children          | Meteorological<br>Extreme weather                | Nutritional                                                                                                                                                        | Meteorological factors (rainfall, temperature) and extreme weather events are associated with childhood undernutrition.                                                                                                                                                                                                                                                                    |
| 59 | Philipsborn  | 2016 | Georgia        | NS        | 1973-2010 | 28 | Yes |                                |                   | Meteorological                                   | Infectious diseases                                                                                                                                                | Higher temperature is associated with Diarrheagenic Escherichia coli. No significant relationship between rainfall and E. coli.                                                                                                                                                                                                                                                            |
| 60 | Phung        | 2015 | Australia      | 2004-2013 | NS        | 13 | No  | Southeast Asia                 |                   | Meteorological                                   | Infectious diseases                                                                                                                                                | Meteorological factors (temperature, humidity) and extreme weather                                                                                                                                                                                                                                                                                                                         |

1  
2  
3  
4  
5  
6  
7  
8  
9  
10  
11  
12  
13  
14  
15  
16  
17  
18  
19  
20  
21  
22  
23  
24  
25  
26  
27  
28  
29  
30  
31  
32  
33  
34  
35  
36  
37  
38  
39  
40  
41  
42  
43  
44  
45  
46  
47

|    |          |      |               |           |           |    |    |                                |                         |                                   |                                                                                                             |                                                                                                                                                                                                                              |
|----|----------|------|---------------|-----------|-----------|----|----|--------------------------------|-------------------------|-----------------------------------|-------------------------------------------------------------------------------------------------------------|------------------------------------------------------------------------------------------------------------------------------------------------------------------------------------------------------------------------------|
|    |          |      |               |           |           |    |    |                                |                         | Extreme weather                   |                                                                                                             | events (flooding) are associated with vector- and water-borne infectious diseases.                                                                                                                                           |
| 61 | Porpora  | 2019 | Italy         | 1964-2019 | NS        | 78 | No |                                |                         | Other                             | Pregnancy and birth                                                                                         | Environmental pollutants may be associated with preterm birth, however this association remains unclear due to conflicting evidence.                                                                                         |
| 62 | Poursafa | 2015 | Iran          | 2001-2013 | NS        | 15 | No |                                |                         | Meteorological                    | Pregnancy and birth                                                                                         | Meteorological factors (higher temperature, lower temperature, humidity, sunlight intensity) are associated with adverse birth outcomes (low birth weight, preterm birth, hypertension, eclampsia).                          |
| 63 | Racloz   | 2012 | Australia     | NS        | NS        | 63 | No |                                |                         | Meteorological                    | Infectious diseases                                                                                         | Higher temperature, increased precipitation and humidity are associated with Dengue.                                                                                                                                         |
| 64 | Rataj    | 2016 | Germany       | 1981-2012 | 1978-2008 | 17 | No | Low to middle income countries |                         | Extreme weather                   | Mental health<br>Other                                                                                      | Extreme weather events are associated with mental health outcomes (e.g., PTSD, anxiety, depression) and injuries.                                                                                                            |
| 65 | Reid     | 2016 | United States | 1990-2015 | NS        | 53 | No |                                | Susceptible populations | Air quality                       | Mortality<br>Respiratory, cardiovascular, and neurological outcomes<br>Mental health<br>Pregnancy and birth | Wildfire smoke exposure is associated with respiratory outcomes (e.g., asthma) and mortality. Wildfire smoke exposure may be associated with cardiovascular, birth, and mental health outcomes, but more research is needed. |
| 66 | Rifkin   | 2018 | United States | 1995-2017 | 1992-2016 | 16 | No |                                |                         | Meteorological<br>Extreme weather | Other                                                                                                       | Temperature and extreme weather events (hurricanes) are associated with sleep quality.                                                                                                                                       |
| 67 | Salve    | 2018 | India         | NS        | NS        | 11 | No | India                          |                         | Meteorological                    | Mortality<br>Health systems<br>Nutritional                                                                  | Increase in temperature is associated with all-cause mortality, cause-specific mortality (e.g., myocardial                                                                                                                   |



|    |            |      |                |           |                         |            |     |                      |  |                 |                                                                                                                                     |                                                                                                                                                                                            |
|----|------------|------|----------------|-----------|-------------------------|------------|-----|----------------------|--|-----------------|-------------------------------------------------------------------------------------------------------------------------------------|--------------------------------------------------------------------------------------------------------------------------------------------------------------------------------------------|
|    |            |      |                |           |                         |            |     |                      |  |                 |                                                                                                                                     | infarctions, stroke, heart diseases), hospitalizations (e.g., heat-related admissions, neonatal intensive unit admissions), and food insecurity and malnutrition, via agricultural issues. |
| 68 | Sanderson  | 2017 | United Kingdom | 1988-2017 | 1900-2101               | 63         | No  |                      |  | Meteorological  | Mortality                                                                                                                           | Higher temperatures and heat waves are associated with mortality and heat-related mortality is likely to increase with increased temperatures.                                             |
| 69 | Sawatzky   | 2018 | Canada         | 2005-2016 | NS                      | 85         | No  | Arctic and Subarctic |  | General         | Health systems                                                                                                                      | Climate change, in general, is associated with a strain in public health resources, via population health issues and surveillance systems may guide future adaptation to climate change.   |
| 70 | Semenza    | 2012 | Sweden         | 1998-2009 | 1995-2007               | 722        | No  |                      |  | Meteorological  | Infectious diseases                                                                                                                 | Meteorological factors (temperature, rainfall) are associated with some food- and water-borne diseases.                                                                                    |
| 71 | Stanke     | 2013 | United Kingdom | 1967-2011 | 1876-1879 and 1961-2010 | 87         | No  |                      |  | Extreme weather | Infectious diseases<br>Mortality<br>Respiratory, cardiovascular, and neurological outcomes<br>Mental health<br>Nutritional<br>Other | Droughts are associated with malnutrition, mortality, infectious diseases, cardiovascular and respiratory outcomes, mental health (e.g., increased worry, anxiety), injuries, and cancer.  |
| 72 | Stensgaard | 2019 | Denmark        | 1995-2017 | NS                      | 20         | No  |                      |  | Meteorological  | Infectious diseases                                                                                                                 | Meteorological factors (temperature, precipitation, humidity) are associated with schistosomiasis and increasing temperatures are likely to affect the geographic range of this parasite.  |
| 73 | Sun        | 2018 | China          | 1999-2017 | 1974-2014               | 30(review) | Yes |                      |  | Meteorological  | Mortality                                                                                                                           | Heat and cold exposure are associated with myocardial                                                                                                                                      |

1  
2  
3  
4  
5  
6  
7  
8  
9  
10  
11  
12  
13  
14  
15  
16  
17  
18  
19  
20  
21  
22  
23  
24  
25  
26  
27  
28  
29  
30  
31  
32  
33  
34  
35  
36  
37  
38  
39  
40  
41  
42  
43  
44  
45  
46  
47

|    |                 |      |                  |               |               |                                   |    |               |          |                                          |                                                                                      |                                                                                                                                                                                                                                                                                                                                                                                                                      |
|----|-----------------|------|------------------|---------------|---------------|-----------------------------------|----|---------------|----------|------------------------------------------|--------------------------------------------------------------------------------------|----------------------------------------------------------------------------------------------------------------------------------------------------------------------------------------------------------------------------------------------------------------------------------------------------------------------------------------------------------------------------------------------------------------------|
|    |                 |      |                  |               |               | w)2<br>3m<br>eta-<br>anal<br>ysis |    |               |          |                                          | Respiratory,<br>cardiovascular,<br>and<br>neurological<br>outcomes<br>Health systems | infarctions (MI) and hospitalization<br>for MI. Heat exposure is associated<br>with MI-specific mortality.                                                                                                                                                                                                                                                                                                           |
| 74 | Swynghe<br>dauw | 2009 | France           | NS            | NS            | NS                                | No |               |          | Meteorolo<br>gical<br>Extreme<br>weather | Infectious<br>diseases<br>Mortality<br>Skin diseases<br>and allergies<br>Other       | Heat and cold exposure are<br>associated with mortality and more<br>specifically, respiratory- and<br>cardiovascular-specific mortality.<br>Exposure to UV is associated with<br>skin cancer and cataracts. Higher<br>temperatures are associated with<br>infectious diseases (mosquito- and<br>food-borne diseases) and extreme<br>weather events are associated with<br>undernutrition and food-borne<br>diseases. |
| 75 | Tall            | 2014 | Australi<br>a    | 1946-<br>2009 | 1886-<br>2006 | 22                                | No | Australi<br>a |          | Extreme<br>weather                       | Infectious<br>diseases                                                               | There is no strong evidence for the<br>association between flooding and<br>the Ross River Virus.                                                                                                                                                                                                                                                                                                                     |
| 76 | Varghese        | 2018 | Australi<br>a    | 1983-<br>2017 | 1922-<br>2017 | 26                                | No |               | Workers  | Meteorolo<br>gical                       | Occupational<br>health and<br>injuries                                               | Heat is associated with occupational<br>injuries in many contexts of work<br>(e.g., agriculture, transport,<br>construction, fishing).                                                                                                                                                                                                                                                                               |
| 77 | Veenema         | 2017 | United<br>States | 2006-<br>2016 | NS            | 47                                | No |               |          | Extreme<br>weather                       | Infectious<br>diseases<br>Mortality<br>Mental health                                 | Extreme water-related weather<br>events are associated with<br>mortality, water- and vector-borne<br>infectious diseases, mental health<br>issues (e.g., PTSD, depression,<br>anxiety).                                                                                                                                                                                                                              |
| 78 | Vilcins         | 2018 | Australi<br>a    | NS            | NS            | 72                                | No |               | Children | Other                                    | Nutritional                                                                          | Certain environmental risk factors<br>(e.g., sanitation, cooking fuels),<br>which could be aggravated by<br>climate change, may be associated<br>with childhood stunting.                                                                                                                                                                                                                                            |
| 79 | Vins            | 2015 | United<br>States | 1995-<br>2005 | NS            | 82                                | No |               |          | Extreme<br>weather                       | Mental health                                                                        | Drought is likely associated with<br>adverse mental health outcomes.                                                                                                                                                                                                                                                                                                                                                 |

|    |             |      |               |           |           |    |     |                    |                               |                         |                                                                                                              |                                                                                                                                                                                                                                                                                                               |
|----|-------------|------|---------------|-----------|-----------|----|-----|--------------------|-------------------------------|-------------------------|--------------------------------------------------------------------------------------------------------------|---------------------------------------------------------------------------------------------------------------------------------------------------------------------------------------------------------------------------------------------------------------------------------------------------------------|
| 80 | Waits       | 2018 | Finland       | 1970-2017 | NS        | 43 | No  | Arctic             |                               | Meteorological          | Infectious diseases                                                                                          | Meteorological factors (especially higher temperature and precipitation) are associated with infectious diseases (e.g. tick borne diseases, tularemia) in the Arctic.                                                                                                                                         |
| 81 | Wald        | 2019 | United States | 2009-2018 | NS        | 17 | No  | United States      |                               | Meteorological          | Health systems                                                                                               | Higher temperature is associated with emergency department (heat-related visits) visits and costs for healthcare systems.                                                                                                                                                                                     |
| 82 | Welch       | 2019 | United States | NS        | NS        | 91 | No  |                    |                               | Meteorological          | Infectious diseases                                                                                          | Meteorological factors (temperature, precipitation) are associated with Salmonella.                                                                                                                                                                                                                           |
| 83 | Wimalawansa | 2016 | United States | NS        | NS        | NS | No  | Tropical Countries | Workers                       | Meteorological<br>Other | Occupational health and injuries                                                                             | Increasing temperatures and environmental pollution (e.g., heavy metals, fertilizers) are associated with occupational health outcomes, such as chronic kidney disease of multifactorial origin.                                                                                                              |
| 84 | Witt        | 2015 | Germany       | NS        | NS        | 33 | Yes |                    | Chronic lung disease patients | Meteorological          | Mortality<br>Respiratory, cardiovascular, and neurological outcomes                                          | Heat is associated with lung disease outcomes and mortality in patients with chronic lung diseases.                                                                                                                                                                                                           |
| 85 | Xu          | 2018 | Australia     | 2004-2016 | 1978-2013 | 19 | No  |                    | Children                      | Meteorological          | Respiratory, cardiovascular, and neurological outcomes                                                       | Heat and cold temperatures are associated with childhood asthma.                                                                                                                                                                                                                                              |
| 86 | Xu          | 2012 | Australia     | 2000-2012 | 1983-2010 | 33 | No  |                    | Children                      | Meteorological          | Infectious diseases<br>Mortality<br>Respiratory, cardiovascular, and neurological outcomes<br>Health systems | Heat and cold are associated with hospital admissions and mortality in children. Temperature is also associated with various infectious diseases (e.g., HFMD, malaria), respiratory diseases (e.g., asthma) and skin outcomes (e.g. eczema). For example, high temperature is associated with Hand Foot Mouth |

|    |         |      |           |           |                        |    |     |  |          |                |                                                                                                              |                                                                                                                                                                                                                           |
|----|---------|------|-----------|-----------|------------------------|----|-----|--|----------|----------------|--------------------------------------------------------------------------------------------------------------|---------------------------------------------------------------------------------------------------------------------------------------------------------------------------------------------------------------------------|
|    |         |      |           |           |                        |    |     |  |          |                | Skin diseases and allergies<br>Other                                                                         | Disease and renal diseases and low temperature is associated with eczema.                                                                                                                                                 |
| 87 | Xu      | 2016 | Australia | 2001-2015 | NS                     | 60 | Yes |  |          | Meteorological | Mortality                                                                                                    | Heat waves are associated with mortality and it seems that the intensity of heatwaves is particularly important compared to length of heatwave.                                                                           |
| 88 | Xu      | 2014 | Australia | 1998-2012 | 1983-2009              | 12 | No  |  | Children | Meteorological | Mortality<br>Respiratory, cardiovascular, and neurological outcomes<br>Health systems<br>Other               | Heat waves are associated with hospital admissions, respiratory diseases, renal diseases, fever and electrolyte imbalances. Evidence concerning the association between heatwaves and children mortality is inconsistent. |
| 89 | Youssef | 2014 | France    | 1990-2011 | 1987-2008              | 94 | No  |  |          | Air quality    | Mortality<br>Respiratory, cardiovascular, and neurological outcomes<br>Health systems<br>Pregnancy and birth | Wildfire smoke exposure is associated with mortality, respiratory and cardiovascular outcomes, hospital admissions. Wildfire smoke exposure may also be associated with adverse birth outcomes (low birth weight).        |
| 90 | Yu      | 2015 | Australia | 1998-2012 | 1961-1990 et 2020-2100 | 20 | No  |  |          | Meteorological | Infectious diseases                                                                                          | Meteorological factors (temperature, rainfall, humidity) may be associated with future malaria transmission, although findings are inconsistent, partly according to geographical focus.                                  |
| 91 | Yu      | 2012 | Australia | 1997-2008 | 1973-2006              | 15 | Yes |  | Elderly  | Meteorological | Mortality                                                                                                    | Heat and cold temperatures are associated with mortality for the elderly, although heat-related associations seem stronger than cold-related associations.                                                                |

1  
2  
3  
4  
5  
6  
7  
8  
9  
10  
11  
12  
13  
14  
15  
16  
17  
18  
19  
20  
21  
22  
23  
24  
25  
26  
27  
28  
29  
30  
31  
32  
33  
34  
35  
36  
37  
38  
39  
40  
41  
42  
43  
44  
45  
46  
47

|    |       |      |           |           |           |     |    |  |                          |                |                                                                                                                                                |                                                                                                                                                                                                                                                                                                                   |
|----|-------|------|-----------|-----------|-----------|-----|----|--|--------------------------|----------------|------------------------------------------------------------------------------------------------------------------------------------------------|-------------------------------------------------------------------------------------------------------------------------------------------------------------------------------------------------------------------------------------------------------------------------------------------------------------------|
| 92 | Zhang | 2007 | Australia | NS        | NS        | NS  | No |  | People with disabilities | General        | Other                                                                                                                                          | Climate change, in general, may be associated with disability-adjusted life years (DALY), and the cost of DALY could be particularly important in low to middle income countries.                                                                                                                                 |
| 93 | Zhang | 2017 | China     | 1997-2016 | 1981-2012 | 36  | No |  | Pregnant people          | Meteorological | Pregnancy and birth                                                                                                                            | High temperature is associated with adverse birth outcomes, such as preterm birth, low birth weight and stillbirth. Low temperature is also associated with some adverse birth outcomes, including preterm birth and low birth, although the evidence is stronger for high temperature than for low temperatures. |
| 94 | Zuo   | 2015 | Australia | NS        | NS        | 173 | No |  |                          | Meteorological | Mortality<br>Respiratory, cardiovascular, and neurological outcomes<br>Health systems<br>Mental health<br>Skin diseases and allergies<br>Other | Heat waves are associated with mortality, hospital admissions, sunburn, heat exhaustion, cardiovascular outcomes (e.g., heart attacks) and mental health outcomes.                                                                                                                                                |

\*NS = non-specified

**Appendix 4.** Summary of quality assessment according to revised AMSTAR-2 items. (Y = yes, PY = partial yes, N = no, NA = non-applicable).

| First author | Year | AMSTAR-2 Items |    |   |    |    |   |    |    |    |    |    |    |    |    |    |    |    |
|--------------|------|----------------|----|---|----|----|---|----|----|----|----|----|----|----|----|----|----|----|
|              |      | 1              | 1b | 2 | 3  | 4  | 5 | 6  | 7  | 8  | 9  | 10 | 11 | 12 | 13 | 14 | 15 | 16 |
| Alderman     | 2012 | Y              | N  | N | PY | PY | N | N  | PY | PY | N  | N  | NA | NA | Y  | N  | NA | N  |
| Amegah       | 2016 | Y              | N  | N | Y  | PY | N | N  | PY | Y  | Y  | N  | NA | NA | Y  | Y  | NA | Y  |
| An           | 2018 | N              | Y  | N | N  | PY | Y | N  | Y  | N  | Y  | N  | NA | NA | Y  | N  | NA | Y  |
| Augustin     | 2008 | Y              | Y  | N | N  | PY | N | N  | PY | N  | PY | N  | NA | NA | Y  | N  | NA | Y  |
| Babaie       | 2018 | Y              | Y  | N | N  | PY | Y | N  | Y  | PY | N  | N  | NA | NA | N  | N  | NA | N  |
| Bai          | 2013 | Y              | Y  | N | PY | PY | N | N  | PY | PY | Y  | N  | NA | NA | Y  | N  | NA | Y  |
| Benevolenza  | 2019 | Y              | Y  | N | PY | N  | N | N  | Y  | PY | PY | N  | NA | NA | Y  | N  | NA | N  |
| Berhane      | 2016 | Y              | N  | Y | N  | N  | N | N  | N  | PY | PY | N  | NA | NA | Y  | N  | NA | N  |
| Bernhardt    | 2019 | Y              | N  | N | N  | N  | N | N  | PY | PY | PY | N  | NA | NA | PY | N  | NA | Y  |
| Binazzi      | 2019 | Y              | Y  | N | Y  | PY | Y | N  | Y  | Y  | Y  | N  | Y  | Y  | Y  | Y  | Y  | Y  |
| Bonafede     | 2016 | Y              | N  | N | PY | PY | Y | N  | Y  | Y  | Y  | N  | NA | NA | Y  | Y  | NA | Y  |
| Brown        | 2013 | Y              | Y  | N | PY | PY | N | N  | Y  | Y  | PY | N  | NA | NA | Y  | Y  | NA | Y  |
| Bunker       | 2016 | Y              | Y  | N | Y  | N  | Y | PY | Y  | Y  | PY | N  | Y  | Y  | Y  | Y  | Y  | Y  |
| Campbell     | 2018 | Y              | N  | N | N  | PY | N | N  | Y  | PY | N  | N  | NA | NA | Y  | PY | NA | Y  |
| Cann         | 2013 | Y              | Y  | Y | PY | PY | N | N  | Y  | PY | PY | N  | NA | NA | Y  | Y  | NA | Y  |
| Carolan-Olah | 2014 | Y              | Y  | N | N  | PY | N | N  | Y  | PY | Y  | N  | NA | NA | PY | PY | NA | N  |
| Cheng        | 2014 | Y              | N  | N | PY | PY | N | N  | Y  | Y  | Y  | N  | NA | NA | Y  | PY | NA | N  |
| Coates       | 2019 | N              | N  | N | N  | N  | N | N  | PY | PY | Y  | N  | NA | NA | Y  | PY | NA | N  |
| Cong         | 2017 | N              | Y  | N | N  | PY | N | Y  | Y  | Y  | Y  | N  | Y  | N  | Y  | Y  | Y  | Y  |
| Cunrui       | 2011 | Y              | N  | N | PY | PY | N | N  | Y  | PY | N  | N  | NA | NA | Y  | N  | NA | Y  |
| deSousa      | 2018 | Y              | N  | N | PY | PY | N | N  | Y  | N  | N  | N  | NA | NA | Y  | N  | NA | Y  |
| Dhimal       | 2015 | Y              | Y  | N | PY | PY | N | N  | Y  | Y  | N  | N  | NA | NA | N  | N  | NA | N  |
| Doocy        | 2013 | Y              | N  | N | N  | PY | Y | N  | Y  | Y  | N  | N  | NA | NA | Y  | PY | NA | Y  |
| Duan         | 2019 | Y              | N  | N | N  | PY | N | N  | Y  | PY | Y  | N  | Y  | Y  | Y  | Y  | Y  | Y  |
| Fan          | 2015 | N              | Y  | N | N  | PY | Y | Y  | PY | PY | Y  | N  | Y  | Y  | Y  | Y  | Y  | Y  |
| Fernandez    | 2015 | Y              | Y  | N | PY | PY | Y | N  | Y  | PY | PY | N  | NA | NA | Y  | N  | NA | N  |
| Flouris      | 2018 | Y              | N  | Y | PY | PY | Y | Y  | Y  | Y  | Y  | Y  | Y  | Y  | Y  | Y  | Y  | Y  |

|             |      |   |   |   |    |    |   |    |    |    |    |   |    |    |   |    |    |   |
|-------------|------|---|---|---|----|----|---|----|----|----|----|---|----|----|---|----|----|---|
| Gao         | 2019 | N | Y | N | PY | PY | Y | N  | Y  | Y  | Y  | N | Y  | Y  | Y | Y  | Y  | Y |
| Gao         | 2014 | Y | N | N | PY | PY | N | PY | Y  | Y  | Y  | N | NA | NA | Y | Y  | NA | Y |
| Ghanizadeh  | 2017 | N | Y | N | PY | N  | Y | PY | Y  | PY | Y  | N | NA | NA | N | N  | NA | Y |
| Ghazani     | 2018 | N | N | N | N  | PY | Y | N  | Y  | Y  | PY | N | NA | NA | Y | PY | NA | Y |
| Gracia      | 2015 | Y | Y | N | PY | PY | Y | N  | Y  | PY | Y  | N | NA | NA | Y | N  | NA | Y |
| Hajat       | 2010 | Y | N | N | Y  | PY | N | N  | Y  | PY | N  | N | NA | NA | N | PY | NA | Y |
| Hedlund     | 2014 | Y | N | N | PY | N  | Y | Y  | Y  | PY | Y  | N | NA | NA | Y | N  | NA | Y |
| Hii         | 2016 | Y | N | N | PY | PY | N | N  | PY | PY | N  | N | NA | NA | N | N  | NA | Y |
| Huang       | 2016 | N | N | N | N  | PY | Y | N  | PY | Y  | Y  | N | Y  | Y  | Y | PY | N  | Y |
| Kampe       | 2016 | Y | N | N | PY | PY | Y | N  | Y  | Y  | PY | N | NA | NA | Y | N  | NA | Y |
| Khader      | 2015 | Y | N | N | PY | PY | Y | N  | Y  | Y  | N  | N | NA | NA | Y | PY | NA | Y |
| Klinger     | 2014 | N | N | N | N  | PY | Y | N  | Y  | N  | Y  | N | NA | NA | Y | N  | NA | Y |
| Kuehn       | 2017 | Y | N | N | N  | PY | N | N  | Y  | Y  | PY | N | NA | NA | Y | N  | NA | Y |
| Lake        | 2017 | Y | Y | N | N  | PY | Y | Y  | PY | PY | N  | N | NA | NA | N | N  | NA | Y |
| Lal         | 2019 | Y | N | Y | N  | PY | N | Y  | Y  | PY | Y  | N | Y  | Y  | Y | Y  | N  | Y |
| Lal         | 2015 | Y | Y | N | N  | PY | N | N  | Y  | PY | PY | N | NA | NA | Y | PY | NA | Y |
| Lawton      | 2019 | Y | N | N | PY | PY | N | N  | Y  | Y  | N  | N | NA | NA | Y | N  | NA | Y |
| Levi        | 2018 | Y | Y | N | PY | PY | Y | N  | Y  | Y  | N  | N | NA | NA | Y | PY | NA | Y |
| Levy        | 2016 | N | N | N | PY | PY | Y | PY | Y  | Y  | Y  | N | NA | NA | Y | Y  | NA | Y |
| Leyva       | 2017 | Y | Y | N | PY | PY | N | N  | Y  | N  | Y  | N | NA | NA | Y | N  | NA | N |
| Li          | 2018 | Y | N | N | N  | PY | N | N  | N  | PY | N  | N | NA | NA | N | N  | NA | Y |
| Lian        | 2015 | Y | N | N | PY | PY | Y | Y  | Y  | N  | Y  | N | Y  | Y  | Y | Y  | Y  | Y |
| Liu         | 2015 | Y | Y | N | Y  | PY | N | N  | Y  | Y  | PY | N | NA | NA | Y | PY | NA | Y |
| Madaniyazi  | 2015 | N | N | N | PY | PY | N | N  | Y  | PY | N  | N | NA | NA | Y | N  | NA | Y |
| Matysiak    | 2017 | Y | Y | N | PY | PY | N | N  | Y  | PY | Y  | N | NA | NA | Y | N  | NA | Y |
| Moghadamnia | 2017 | Y | N | N | PY | PY | Y | N  | Y  | Y  | Y  | N | Y  | N  | Y | Y  | N  | Y |
| Naish       | 2014 | Y | Y | N | PY | PY | N | N  | PY | PY | PY | N | NA | NA | Y | N  | NA | Y |
| Nichols     | 2009 | Y | N | N | PY | PY | Y | Y  | Y  | Y  | N  | N | NA | NA | N | N  | NA | Y |
| Odame       | 2018 | Y | N | N | PY | PY | N | N  | PY | PY | N  | N | Y  | N  | Y | Y  | Y  | Y |
| Park        | 2017 | Y | N | N | N  | PY | Y | Y  | N  | PY | Y  | N | Y  | PY | Y | Y  | N  | Y |
| Phalkey     | 2015 | Y | Y | N | PY | PY | Y | Y  | Y  | PY | PY | N | NA | NA | Y | N  | NA | Y |

|             |      |   |   |   |    |    |   |   |    |    |    |   |    |    |   |    |    |   |
|-------------|------|---|---|---|----|----|---|---|----|----|----|---|----|----|---|----|----|---|
| Philipsborn | 2016 | Y | Y | N | PY | N  | N | N | Y  | PY | N  | N | Y  | Y  | N | Y  | N  | Y |
| Phung       | 2015 | Y | Y | N | N  | PY | N | N | Y  | Y  | PY | Y | NA | NA | N | N  | NA | Y |
| Porpora     | 2019 | Y | Y | Y | PY | PY | N | N | Y  | PY | N  | N | NA | NA | N | Y  | NA | Y |
| Poursafa    | 2015 | Y | N | N | PY | PY | Y | Y | PY | Y  | PY | N | NA | NA | Y | Y  | NA | Y |
| Racloz      | 2012 | Y | N | N | N  | PY | N | N | N  | PY | N  | N | NA | NA | Y | Y  | NA | Y |
| Rataj       | 2016 | Y | Y | Y | PY | PY | Y | Y | PY | PY | Y  | N | NA | NA | Y | Y  | NA | Y |
| Reid        | 2016 | Y | N | N | PY | PY | N | N | N  | PY | PY | N | NA | NA | Y | PY | NA | Y |
| Rifkin      | 2018 | Y | Y | Y | PY | PY | Y | Y | Y  | PY | N  | N | NA | NA | Y | N  | NA | Y |
| Salve       | 2018 | Y | Y | N | N  | PY | Y | Y | PY | PY | N  | N | NA | NA | Y | N  | NA | Y |
| Sanderson   | 2017 | Y | Y | N | N  | PY | Y | N | Y  | PY | PY | N | NA | NA | Y | N  | NA | Y |
| Sawatzky    | 2018 | Y | Y | N | N  | PY | Y | N | Y  | N  | N  | N | NA | NA | N | N  | NA | Y |
| Semenza     | 2012 | N | N | N | N  | N  | N | N | N  | N  | Y  | N | NA | NA | N | N  | NA | N |
| Stanke      | 2013 | Y | N | N | PY | PY | N | N | Y  | PY | N  | N | NA | NA | Y | N  | NA | Y |
| Stensgaard  | 2019 | Y | Y | N | N  | PY | N | Y | N  | PY | N  | N | NA | NA | N | N  | NA | Y |
| Sun         | 2018 | Y | Y | N | PY | PY | N | Y | Y  | Y  | Y  | N | Y  | Y  | Y | Y  | Y  | Y |
| Swynghedauw | 2009 | Y | Y | N | N  | N  | N | N | N  | N  | N  | N | NA | NA | N | N  | NA | Y |
| Tall        | 2014 | Y | N | N | N  | PY | N | N | Y  | Y  | PY | N | NA | NA | Y | N  | NA | Y |
| Varghese    | 2018 | Y | N | N | N  | PY | N | N | Y  | Y  | N  | N | NA | NA | Y | N  | NA | Y |
| Veenema     | 2017 | Y | N | Y | N  | PY | N | N | Y  | N  | PY | N | NA | NA | N | N  | NA | N |
| Vilcins     | 2018 | Y | N | Y | N  | PY | N | N | Y  | N  | Y  | N | NA | NA | Y | N  | NA | Y |
| Vins        | 2015 | Y | Y | N | N  | PY | N | N | Y  | N  | N  | N | NA | NA | Y | PY | NA | Y |
| Waits       | 2018 | Y | Y | N | N  | PY | N | N | Y  | N  | N  | N | NA | NA | N | N  | NA | Y |
| Wald        | 2019 | Y | N | N | N  | PY | N | N | Y  | Y  | N  | N | NA | NA | Y | N  | NA | N |
| Welch       | 2019 | Y | Y | N | N  | N  | N | N | PY | PY | N  | N | NA | NA | N | N  | NA | N |
| Wimalawansa | 2016 | Y | N | N | N  | N  | N | N | N  | N  | N  | N | NA | NA | N | N  | NA | Y |
| Witt        | 2015 | Y | N | N | N  | PY | N | N | Y  | N  | N  | N | N  | Y  | Y | N  | N  | Y |
| Xu          | 2018 | Y | N | N | PY | PY | N | N | PY | PY | N  | N | NA | NA | Y | N  | NA | Y |
| Xu          | 2012 | Y | N | N | PY | PY | N | N | PY | Y  | PY | N | NA | NA | N | N  | NA | Y |
| Xu          | 2016 | Y | N | N | PY | PY | N | N | Y  | Y  | N  | N | Y  | N  | Y | Y  | N  | Y |
| Xu          | 2014 | Y | Y | N | N  | PY | N | N | Y  | Y  | N  | N | NA | NA | N | Y  | NA | N |
| Youssef     | 2014 | Y | Y | N | PY | PY | N | N | Y  | Y  | N  | N | NA | NA | Y | N  | NA | Y |



|       |                        |    |    |    |    |    |    |    |    |    |    |    |    |    |    |    |    |    |
|-------|------------------------|----|----|----|----|----|----|----|----|----|----|----|----|----|----|----|----|----|
| Yu    | 2015                   | N  | N  | N  | PY | PY | N  | N  | Y  | Y  | N  | N  | NA | NA | Y  | PY | NA | Y  |
| Yu    | 2012                   | Y  | Y  | N  | PY | N  | N  | Y  | Y  | Y  | N  | N  | Y  | N  | Y  | Y  | Y  | Y  |
| Zhang | 2007                   | Y  | N  | N  | N  | N  | N  | N  | N  | N  | N  | N  | NA | NA | Y  | N  | NA | N  |
| Zhang | 2017                   | Y  | Y  | N  | PY | PY | N  | N  | PY | Y  | Y  | N  | NA | NA | Y  | Y  | NA | Y  |
| Zuo   | 2015                   | Y  | Y  | N  | N  | PY | N  | N  | N  | N  | N  | N  | NA | NA | N  | N  | NA | Y  |
| TOTAL | Yes                    | 81 | 44 | 9  | 5  | 0  | 32 | 17 | 64 | 36 | 31 | 2  | 17 | 12 | 70 | 28 | 11 | 78 |
|       | Partial<br>Yes         | 0  | 0  | 0  | 47 | 80 | 0  | 4  | 19 | 41 | 22 | 0  | 0  | 1  | 2  | 15 | 0  | 0  |
|       | No                     | 13 | 50 | 85 | 42 | 14 | 62 | 73 | 11 | 17 | 41 | 92 | 1  | 5  | 22 | 51 | 7  | 16 |
|       | Not-<br>Applic<br>able | 0  | 0  | 0  | 0  | 0  | 0  | 0  | 0  | 0  | 0  | 0  | 0  | 76 | 76 | 0  | 0  | 76 |

**Appendix 5.** Summary table of publications according to climate impact and health outcome according to frequencies and references. References with a \* explore only this specific combination of climate impact and health outcome and therefore appear only once in this table. Number of studies and references (according to alphabetical order) for each combination of categories are presented in the cells. Empty cells in this Table indicate an absence of studies at this combination of categories.

| Health Outcome                                     | Climate Impact                                                                                                                                                                                                                                                                                                                              |                                                                                                                                           |                                                                    |                              |           |
|----------------------------------------------------|---------------------------------------------------------------------------------------------------------------------------------------------------------------------------------------------------------------------------------------------------------------------------------------------------------------------------------------------|-------------------------------------------------------------------------------------------------------------------------------------------|--------------------------------------------------------------------|------------------------------|-----------|
|                                                    | Meteorological (71)                                                                                                                                                                                                                                                                                                                         | Extreme weather (24)                                                                                                                      | Air quality (7)                                                    | General (5)                  | Other (3) |
| Infectious diseases (41)                           | <p><b>35</b></p> <p>Amegah, Babaie*, Bai*, Berhane, Bernhardt*, Cheng, Coates*, de Sousa, Dhimal*, Duan*, Fan*, Gao 2014, Ghazani*, Gracia*, Hedlund, Hii*, Khader, Lal 2015*, Lal 2019*, Levy, Leyva, Li, Matysiak, Naish*, Nichols, Philipsborn*, Phung, Racloz*, Semenza*, Stensgaard, Swynghedau, Waits*, Welch*, Xu 2012, Yu 2015*</p> | <p><b>14</b></p> <p>Alderman, Berhane, Brown*, Cann*, Hedlund, Levy, Li, Matysiak, Nichols, Phung, Stanke, Swynghedau, Tall*, Veenema</p> |                                                                    |                              |           |
| Mortality (32)                                     | <p><b>24</b></p> <p>Amegah, Bunker, Campbell, Cheng, Cunrui*, Ghanizadeh, Hajat*, Khader, Lawton, Leyva, Lian, Moghdamnia*, Nichols, Odame*, Salve, Sanderson*, Sun, Swynghedauw, Witt, Xu 2012, Xu 2014, Xu 2016*, Yu 2012*, Zuo</p>                                                                                                       | <p><b>5</b></p> <p>Alderman, Doocy, Leyva, Stanke, Veenema</p>                                                                            | <p><b>5</b></p> <p>Leyva, Liu, Madniyazi*, Reid, Youssouf</p>      |                              |           |
| Respiratory, cardiovascular, and neurological (23) | <p><b>17</b></p> <p>Amegah, Bunker, Cheng, Cong*, de Sousa, Gao 2014, Ghanizadeh, Lawton, Leyva, Lian, Nichols, Sun, Witt, Xu 2012, Xu 2014, Xu 2018*, Zuo</p>                                                                                                                                                                              | <p><b>1</b></p> <p>Stanke</p>                                                                                                             | <p><b>6</b></p> <p>Khader, Leyva, Liu, Nichols, Reid, Youssouf</p> | <p><b>1</b></p> <p>Lake*</p> |           |

|                                                                      |                                      |                                                                                                |                                                                                              |                                 |                         |                        |
|----------------------------------------------------------------------|--------------------------------------|------------------------------------------------------------------------------------------------|----------------------------------------------------------------------------------------------|---------------------------------|-------------------------|------------------------|
| 1<br>2<br>3<br>4<br>5<br>6<br>7                                      | Health systems (16)                  | <b>11</b><br>Amegah, Campbell, Cheng, Khader, Leyva, Salve, Sun, Wald*, Xu 2012, Xu 2014, Zuo  | <b>2</b><br>Alderman, Klinger*                                                               | <b>2</b><br>Liu, Youssouf       | <b>1</b><br>Sawatzky*   |                        |
| 8<br>9<br>10<br>11<br>12<br>13                                       | Mental Health (13)                   | <b>3</b><br>Gao 2019*, Khader, Zuo                                                             | <b>9</b><br>Alderman, Benevolenza, Fernandez*, Leyva, Nichols, Rataj, Stanke, Veenema, Vins* | <b>1</b><br>Reid                |                         |                        |
| 14<br>15<br>16<br>17<br>18<br>19                                     | Pregnancy and birth outcomes (11)    | <b>5</b><br>Carolan-Olah*, Kuehn*, Poursafa*, Khader, Zhang 2017*                              | <b>2</b><br>Alderman, Benevolenza                                                            | <b>3</b><br>Liu, Reid, Youssouf |                         | <b>1</b><br>Porpora*   |
| 20<br>21<br>22<br>23<br>24                                           | Nutritional (9)                      | <b>4</b><br>Amegah, Khader, Phalkey, Salve                                                     | <b>6</b><br>Berhane, Khader, Nichols, Phalkey, Stanke, Swynghedauw                           |                                 | <b>1</b><br>An*         | <b>1</b><br>Vilcins*   |
| 25<br>26<br>27<br>28<br>29                                           | Skin diseases and allergies (8)      | <b>7</b><br>Amegah, Augustin*, Nichols, Gao 2014, Swynghedauw, Xu 2012, Zuo                    |                                                                                              |                                 | <b>1</b><br>Huang*      |                        |
| 30<br>31<br>32<br>33<br>34<br>35                                     | Occupational health and injuries (6) | <b>6</b><br>Binazzi*, Bonafede*, Flouris*, Levi*, Varghese*, Wimalawans                        |                                                                                              |                                 |                         | <b>1</b><br>Wimalawans |
| 36<br>37<br>38<br>39<br>40<br>41<br>42<br>43<br>44<br>45<br>46<br>47 | Other (17)                           | <b>10</b><br>Bunker, Cheng, Kampe*, Nichols, Park*, Rifkin, Swynghedauw, Xu 2012, Xu 2014, Zuo | <b>6</b><br>Alderman, Benevolenza, Doocy, Rataj, Rifkin, Stanke                              | <b>1</b><br>Liu                 | <b>1</b><br>Zhang 2007* |                        |

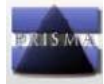

# PRISMA 2009 Checklist

| Section/topic                      | #  | Checklist item                                                                                                                                                                                                                                                                                              | Reported on page # |
|------------------------------------|----|-------------------------------------------------------------------------------------------------------------------------------------------------------------------------------------------------------------------------------------------------------------------------------------------------------------|--------------------|
| <b>TITLE</b>                       |    |                                                                                                                                                                                                                                                                                                             |                    |
| Title                              | 1  | Identify the report as a systematic review, meta-analysis, or both.                                                                                                                                                                                                                                         | 1                  |
| <b>ABSTRACT</b>                    |    |                                                                                                                                                                                                                                                                                                             |                    |
| Structured summary                 | 2  | Provide a structured summary including, as applicable: background; objectives; data sources; study eligibility criteria, participants, and interventions; study appraisal and synthesis methods; results; limitations; conclusions and implications of key findings; systematic review registration number. | 1                  |
| <b>INTRODUCTION</b>                |    |                                                                                                                                                                                                                                                                                                             |                    |
| Rationale                          | 3  | Describe the rationale for the review in the context of what is already known.                                                                                                                                                                                                                              | 2                  |
| Objectives                         | 4  | Provide an explicit statement of questions being addressed with reference to participants, interventions, comparisons, outcomes, and study design (PICOS).                                                                                                                                                  | 2                  |
| <b>METHODS</b>                     |    |                                                                                                                                                                                                                                                                                                             |                    |
| Protocol and registration          | 5  | Indicate if a review protocol exists, if and where it can be accessed (e.g., Web address), and, if available, provide registration information including registration number.                                                                                                                               | 3                  |
| Eligibility criteria               | 6  | Specify study characteristics (e.g., PICOS, length of follow-up) and report characteristics (e.g., years considered, language, publication status) used as criteria for eligibility, giving rationale.                                                                                                      | 3                  |
| Information sources                | 7  | Describe all information sources (e.g., databases with dates of coverage, contact with study authors to identify additional studies) in the search and date last searched.                                                                                                                                  | 3                  |
| Search                             | 8  | Present full electronic search strategy for at least one database, including any limits used, such that it could be repeated.                                                                                                                                                                               | 31                 |
| Study selection                    | 9  | State the process for selecting studies (i.e., screening, eligibility, included in systematic review, and, if applicable, included in the meta-analysis).                                                                                                                                                   | 3,4                |
| Data collection process            | 10 | Describe method of data extraction from reports (e.g., piloted forms, independently, in duplicate) and any processes for obtaining and confirming data from investigators.                                                                                                                                  | 4                  |
| Data items                         | 11 | List and define all variables for which data were sought (e.g., PICOS, funding sources) and any assumptions and simplifications made.                                                                                                                                                                       | 4                  |
| Risk of bias in individual studies | 12 | Describe methods used for assessing risk of bias of individual studies (including specification of whether this was done at the study or outcome level), and how this information is to be used in any data synthesis.                                                                                      | 5                  |
| Summary measures                   | 13 | State the principal summary measures (e.g., risk ratio, difference in means).                                                                                                                                                                                                                               | 4                  |
| Synthesis of results               | 14 | Describe the methods of handling data and combining results of studies, if done, including measures of consistency (e.g., $I^2$ ) for each meta-analysis.                                                                                                                                                   | 4,5                |

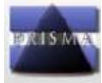

# PRISMA 2009 Checklist

Page 1 of 2

| Section/topic                 | #  | Checklist item                                                                                                                                                                                           | Reported on page # |
|-------------------------------|----|----------------------------------------------------------------------------------------------------------------------------------------------------------------------------------------------------------|--------------------|
| Risk of bias across studies   | 15 | Specify any assessment of risk of bias that may affect the cumulative evidence (e.g., publication bias, selective reporting within studies).                                                             | 5, 53-56           |
| Additional analyses           | 16 | Describe methods of additional analyses (e.g., sensitivity or subgroup analyses, meta-regression), if done, indicating which were pre-specified.                                                         | NA                 |
| <b>RESULTS</b>                |    |                                                                                                                                                                                                          |                    |
| Study selection               | 17 | Give numbers of studies screened, assessed for eligibility, and included in the review, with reasons for exclusions at each stage, ideally with a flow diagram.                                          | 6                  |
| Study characteristics         | 18 | For each study, present characteristics for which data were extracted (e.g., study size, PICOS, follow-up period) and provide the citations.                                                             | 6-8                |
| Risk of bias within studies   | 19 | Present data on risk of bias of each study and, if available, any outcome level assessment (see item 12).                                                                                                | 8                  |
| Results of individual studies | 20 | For all outcomes considered (benefits or harms), present, for each study: (a) simple summary data for each intervention group (b) effect estimates and confidence intervals, ideally with a forest plot. | 38-52              |
| Synthesis of results          | 21 | Present results of each meta-analysis done, including confidence intervals and measures of consistency.                                                                                                  | 11-17              |
| Risk of bias across studies   | 22 | Present results of any assessment of risk of bias across studies (see Item 15).                                                                                                                          | 8,53-56            |
| Additional analysis           | 23 | Give results of additional analyses, if done (e.g., sensitivity or subgroup analyses, meta-regression [see Item 16]).                                                                                    | NA                 |
| <b>DISCUSSION</b>             |    |                                                                                                                                                                                                          |                    |
| Summary of evidence           | 24 | Summarize the main findings including the strength of evidence for each main outcome; consider their relevance to key groups (e.g., healthcare providers, users, and policy makers).                     | 17-18              |
| Limitations                   | 25 | Discuss limitations at study and outcome level (e.g., risk of bias), and at review-level (e.g., incomplete retrieval of identified research, reporting bias).                                            | 19                 |
| Conclusions                   | 26 | Provide a general interpretation of the results in the context of other evidence, and implications for future research.                                                                                  | 19                 |
| <b>FUNDING</b>                |    |                                                                                                                                                                                                          |                    |
| Funding                       | 27 | Describe sources of funding for the systematic review and other support (e.g., supply of data); role of funders for the systematic review.                                                               | 21                 |

From: Moher D, Liberati A, Tetzlaff J, Altman DG, The PRISMA Group (2009). Preferred Reporting Items for Systematic Reviews and Meta-Analyses: The PRISMA Statement. PLoS Med 6(6): e1000097. doi:10.1371/journal.pmed1000097

For more information, visit: [www.prisma-statement.org](http://www.prisma-statement.org).

Page 2 of 2

For peer review only - <http://bmjopen.bmj.com/site/about/guidelines.xhtml>

# BMJ Open

## The Health Effects of Climate Change: An Overview of Systematic Reviews

|                                 |                                                                                                                                                                                                                                                                                                                                                                                                                                                                                                                                                                                                                                                                                                                                                              |
|---------------------------------|--------------------------------------------------------------------------------------------------------------------------------------------------------------------------------------------------------------------------------------------------------------------------------------------------------------------------------------------------------------------------------------------------------------------------------------------------------------------------------------------------------------------------------------------------------------------------------------------------------------------------------------------------------------------------------------------------------------------------------------------------------------|
| Journal:                        | <i>BMJ Open</i>                                                                                                                                                                                                                                                                                                                                                                                                                                                                                                                                                                                                                                                                                                                                              |
| Manuscript ID                   | bmjopen-2020-046333.R2                                                                                                                                                                                                                                                                                                                                                                                                                                                                                                                                                                                                                                                                                                                                       |
| Article Type:                   | Original research                                                                                                                                                                                                                                                                                                                                                                                                                                                                                                                                                                                                                                                                                                                                            |
| Date Submitted by the Author:   | 22-May-2021                                                                                                                                                                                                                                                                                                                                                                                                                                                                                                                                                                                                                                                                                                                                                  |
| Complete List of Authors:       | Rocque, Rhea; The University of Winnipeg, Prairie Climate Centre<br>Beaudoin, Caroline; Université Laval, Faculty of Medicine<br>Ndjaboue, Ruth; Université Laval, Faculty of Medicine; VITAM Research Centre for Sustainable Health<br>Cameron, Laura; The University of Winnipeg, Prairie Climate Centre<br>Poirier-Bergeron, Louann; Université Laval, Faculty of Medicine<br>Poulin-Rheault, Rose-Alice; Université Laval, Faculty of Medicine<br>Fallon, Catherine; Université Laval, Faculty of Medicine; CHUQ Research Centre<br>Tricco, Andrea; Li Ka Shing Knowledge Institute, ; University of Toronto, Dalla Lana School of Public Health<br>Witteman, Holly; Laval University, Faculty of Medicine; VITAM Research Centre for Sustainable Health |
| <b>Primary Subject Heading</b>: | Public health                                                                                                                                                                                                                                                                                                                                                                                                                                                                                                                                                                                                                                                                                                                                                |
| Secondary Subject Heading:      | Public health, Global health                                                                                                                                                                                                                                                                                                                                                                                                                                                                                                                                                                                                                                                                                                                                 |
| Keywords:                       | PUBLIC HEALTH, SOCIAL MEDICINE, Public health < INFECTIOUS DISEASES                                                                                                                                                                                                                                                                                                                                                                                                                                                                                                                                                                                                                                                                                          |
|                                 |                                                                                                                                                                                                                                                                                                                                                                                                                                                                                                                                                                                                                                                                                                                                                              |

SCHOLARONE™  
Manuscripts



I, the Submitting Author has the right to grant and does grant on behalf of all authors of the Work (as defined in the below author licence), an exclusive licence and/or a non-exclusive licence for contributions from authors who are: i) UK Crown employees; ii) where BMJ has agreed a CC-BY licence shall apply, and/or iii) in accordance with the terms applicable for US Federal Government officers or employees acting as part of their official duties; on a worldwide, perpetual, irrevocable, royalty-free basis to BMJ Publishing Group Ltd ("BMJ") its licensees and where the relevant Journal is co-owned by BMJ to the co-owners of the Journal, to publish the Work in this journal and any other BMJ products and to exploit all rights, as set out in our [licence](#).

The Submitting Author accepts and understands that any supply made under these terms is made by BMJ to the Submitting Author unless you are acting as an employee on behalf of your employer or a postgraduate student of an affiliated institution which is paying any applicable article publishing charge ("APC") for Open Access articles. Where the Submitting Author wishes to make the Work available on an Open Access basis (and intends to pay the relevant APC), the terms of reuse of such Open Access shall be governed by a Creative Commons licence – details of these licences and which [Creative Commons](#) licence will apply to this Work are set out in our licence referred to above.

Other than as permitted in any relevant BMJ Author's Self Archiving Policies, I confirm this Work has not been accepted for publication elsewhere, is not being considered for publication elsewhere and does not duplicate material already published. I confirm all authors consent to publication of this Work and authorise the granting of this licence.

# The Health Effects of Climate Change: An Overview of Systematic Reviews

Rh ea Rocque, PhD<sup>1</sup>, Caroline Beaudoin, DEC<sup>2</sup>, Ruth Ndjaboue, MPH, PhD<sup>2,3</sup>, Laura Cameron, MA<sup>1</sup>, Louann Poirier Bergeron, DES<sup>2</sup>, Rose-Alice Poulin-Rheault, DEC<sup>2</sup>, Catherine S. Fallon, MSc<sup>2,4</sup>, Andrea C. Tricco, PhD<sup>5,6</sup>, Holly O. Witteman, PhD<sup>2,3,4</sup>

<sup>1</sup>Prairie Climate Centre, University of Winnipeg, Winnipeg

<sup>2</sup>Faculty of Medicine, Laval University, Quebec City

<sup>3</sup>VITAM Research Centre for Sustainable Health, Quebec City

<sup>4</sup>Research Centre of the CHU de Qu ebec-Laval University, Quebec City

<sup>5</sup>Li Ka Shing Knowledge Institute, Unity Health Toronto, Toronto

<sup>6</sup>Dalla Lana School of Public Health, University of Toronto, Toronto

## Corresponding author:

Rh ea Rocque - rhea.rocque@gmail.com

Prairie Climate Centre

University of Winnipeg

515 Portage Avenue

Winnipeg, Manitoba, Canada R3B 2E9

Phone number: 1.204.786.7811

Fax number: 1.204.783.4996

## Abstract

**Objectives:** We aimed to develop a systematic synthesis of systematic reviews of health impacts of climate change, by synthesizing studies' characteristics, climate impacts, health outcomes, and key findings.

**Design:** We conducted an overview of systematic reviews of health impacts of climate change. We registered our review in PROSPERO (CRD42019145972). No ethical approval was required since we used secondary data. Additional data is not available.

**Data Sources:** On June 22, 2019, we searched Medline, CINAHL, Embase, Cochrane, and Web of Science.

**Eligibility Criteria:** We included systematic reviews that explored at least one health impact of climate change.

**Data Extraction and Synthesis:** We organized systematic reviews according to their key characteristics, including geographical regions, year of publication and authors' affiliations. We mapped the climate effects and health outcomes being studied and synthesized major findings. We used a modified version of AMSTAR-2 to assess the quality of studies.



1  
2  
3 38 Results: We included ninety-four systematic reviews. Most were published after 2015 and  
4 39 approximately one fifth contained meta-analyses. Reviews synthesized evidence about five  
5 40 categories of climate impacts; the two most common were meteorological and extreme weather  
6 41 events. Reviews covered ten health outcome categories; the three most common were 1)  
7 42 infectious diseases, 2) mortality, and 3) respiratory, cardiovascular, or neurological outcomes.  
8 43 Most reviews suggested a deleterious impact of climate change on multiple adverse health  
9 44 outcomes, although the majority also called for more research.

12 45 Conclusions: Most systematic reviews suggest that climate change is associated with worse  
13 46 human health. This study provides a comprehensive higher-order summary of research on  
14 47 health impacts of climate change. Study limitations include possible missed relevant reviews, no  
15 48 meta-meta-analyses, and no assessment of overlap. Future research could explore the potential  
16 49 explanations between these associations to propose adaptation and mitigation strategies and  
17 50 could include broader socio-psychological health impacts of climate change.

## 21 51 Keywords

22 52 Health; Climate Change; Overview of Systematic Reviews; Extreme Weather Events; Air  
23 53 Quality; Global Warming  
24 54

## 28 55 Strengths and limitations of this study

- 31 56
- 32 57 • A strength of this study is that it provides the first broad overview of previous systematic  
33 58 reviews exploring the health impacts of climate change. By targeting systematic reviews,  
34 59 we achieve a higher-order summary of findings than what would have been possible by  
35 60 consulting individual original studies.
  - 36 61 • By synthesizing findings across all included studies and according to the combination of  
37 62 climate impact and health outcome, we offer a clear, detailed, and unique summary of  
38 63 the current state of evidence and knowledge gaps about how climate change may  
39 64 influence human health.
  - 40 65 • A limitation of this study is that we were unable to access some full texts and therefore  
41 66 some studies were excluded, even though we deemed them potentially relevant after  
42 67 title and abstract inspection.
  - 43 68 • Another limitation is that we could not conduct meta-meta-analyses of findings across  
44 69 reviews, due to the heterogeneity of the included systematic reviews and the relatively  
45 70 small proportion of studies reporting meta-analytic findings.
  - 46 71 • Finally, the date of the systematic search is a limitation, as we conducted the search in  
47 72 June 2019.
- 48 71  
49  
50  
51

## 52 72 Introduction

53 73 The environmental consequences of climate change such as sea-level rise, increasing  
54 74 temperatures, more extreme weather events, increased droughts, flooding, and wildfires are

1  
2  
3 75 impacting human health and lives.<sup>1,2</sup> Previous studies and reviews have documented the  
4 76 multiple health impacts of climate change, including an increase in infectious diseases,  
5 77 respiratory disorders, heat-related morbidity and mortality, undernutrition due to food insecurity,  
6 78 and adverse health outcomes ensuing from increased socio-political tension and conflicts.<sup>2-5</sup>  
7 79 Indeed, the most recent Lancet Countdown report,<sup>2</sup> which investigates 43 indicators of the  
8 80 relationship between climate change and human health, arrived at their most worrisome findings  
9 81 since the beginning of their on-going annual work. This report underlines that the health impacts  
10 82 of climate change continue to worsen and are being felt on every continent, although they are  
11 83 having a disproportionate and unequal impact on populations.<sup>2</sup> Authors caution that these  
12 84 health impacts will continue to worsen unless we see an immediate international response to  
13 85 limiting climate change.  
14 86

15 87 To guide future research and action to mitigate and adapt to the health impacts of climate  
16 88 change and its environmental consequences, we need a complete and thorough overview of the  
17 89 research already conducted regarding the health impacts of climate change. Although the  
18 90 number of original studies researching the health impacts of climate change has greatly  
19 91 increased in the recent decade,<sup>2</sup> these do not allow for an in-depth overview of the current  
20 92 literature on the topic. Systematic reviews, on the other hand, allow a higher-order overview of  
21 93 the literature. Although previous systematic reviews have been conducted on the health impacts  
22 94 of climate change, these tend to focus on specific climate effects (e.g., impact of wildfires on  
23 95 health),<sup>6,7</sup> health impacts (e.g., occupational health outcomes),<sup>8,9</sup> countries,<sup>10-12</sup> or are no longer  
24 96 up to date,<sup>13,14</sup> thus limiting our global understanding of what is currently known about the  
25 97 multiple health impacts of climate change across the world.  
26 98

27 99 In this study, we aimed to develop such a complete overview by synthesizing systematic  
28 100 reviews of health impacts of climate change. This higher-order overview of the literature will  
29 101 allow us to better prepare for the worsening health impacts of climate change, by identifying and  
30 102 describing the diversity and range of health impacts studied, as well as by identifying gaps in  
31 103 previous research. Our research objectives were to synthesize studies' characteristics such as  
32 104 geographical regions, years of publication, and authors' affiliations, to map the climate impacts,  
33 105 health outcomes, and combinations of these that have been studied, and to synthesize key  
34 106 findings.  
35

## 36 107 **Methods**

37 108 We applied the Cochrane method for overviews of reviews.<sup>15</sup> This method is designed to  
38 109 systematically map the themes of studies on a topic and synthesize findings to achieve a  
39 110 broader overview of the available literature on the topic.  
40

## 41 111 **Research questions**

42 112 Our research questions were the following: 1) What is known about the relationship between  
43 113 climate change and health, as shown in previous systematic reviews? 2) What are the  
44 114 characteristics of these studies? We registered our plan (CRD42019145972<sup>16</sup>) in PROSPERO,  
45  
46  
47  
48  
49  
50  
51  
52  
53  
54  
55  
56  
57  
58  
59  
60

1  
2  
3 115 an international prospective register of systematic reviews and followed PRISMA 2020<sup>17</sup> to  
4 116 report our findings, as a reporting guideline for overviews is still in development.<sup>18</sup>  
5  
6

## 7 117 Search strategy and selection criteria

8  
9 118 To identify relevant studies, we used a systematic search strategy. There were two inclusion  
10 119 criteria. We included studies in this review if they 1) were systematic reviews of original  
11 120 research and 2) reported at least one health impact as it related (directly or indirectly) to climate  
12 121 change.  
13

14 122  
15 123 We defined a systematic review, based on Cochrane's definition, as a review of the literature in  
16 124 which one "attempts to identify, appraise and synthesize all the empirical evidence that meets  
17 125 pre-specified eligibility criteria to answer a specific research question [by] us[ing] explicit,  
18 126 systematic methods that are selected with a view aimed at minimizing bias, to produce more  
19 127 reliable findings to inform decision making."<sup>19</sup> We included systematic reviews of original  
20 128 research, with or without meta-analyses. We excluded narrative reviews, non-systematic  
21 129 literature reviews and systematic reviews of materials that were not original research (e.g.,  
22 130 systematic reviews of guidelines.)  
23

24 131  
25 132 We based our definition of health impacts on the World Health Organization's (WHO) definition  
26 133 of health as, "a state of complete physical, mental and social well-being and not merely the  
27 134 absence of disease or infirmity."<sup>20</sup> Therefore, health impacts included, among others, morbidity,  
28 135 mortality, new conditions, worsening/improving conditions, injuries, and psychological well-  
29 136 being. Included studies could refer to climate change or global warming directly or indirectly, for  
30 137 instance, by synthesizing the direct or indirect health effects of temperature rises or of natural  
31 138 conditions/disasters made more likely by climate change (e.g., floods, wildfires, temperature  
32 139 variability, droughts.) Although climate change and global warming are not equivalent terms, in  
33 140 an effort to avoid missing relevant literature, we included studies using either term. We included  
34 141 systematic reviews whose main focus was not the health impacts of climate change, providing  
35 142 they reported at least one result regarding health effects related to climate change (or  
36 143 consequences of climate change.) We excluded studies if they did not report at least one health  
37 144 effect of climate change. For instance, we excluded studies which reported on existing  
38 145 measures of health impacts of climate change (and not the health impact itself) and studies  
39 146 which reported on certain health impacts without a mention of climate change, global warming  
40 147 or environmental consequences made more likely by climate change.  
41

42 148  
43 149 On June 22, 2019, we retrieved systematic reviews regarding the health effects of climate  
44 150 change by searching from inception the electronic databases Medline, CINAHL, Embase,  
45 151 Cochrane, Web of Science using a structured search (see Appendix 1 for final search strategy  
46 152 developed by a librarian.) We did not apply language restrictions. After removing duplicates, we  
47 153 imported references into Covidence.<sup>21</sup>  
48  
49  
50  
51  
52  
53  
54  
55  
56  
57  
58  
59

## 154 Screening process and data extraction

155 To select studies, two trained analysts first screened independently titles and abstracts to  
156 eliminate articles that did not meet our inclusion criteria. Next, the two analysts independently  
157 screened the full text of each article. A senior analyst resolved any conflict or disagreement.

158  
159 Next, we decided on key information that needed to be extracted from studies. We extracted the  
160 first author's name, year of publication, number of studies included, time frame (in years) of the  
161 studies included in the article, first author's institution's country affiliation, whether the  
162 systematic review included a meta-analysis, geographical focus, population focus, the climate  
163 impact(s) and the health outcome(s) as well as the main findings and limitations of each  
164 systematic review.

165  
166 Two or more trained analysts (RR, CB, RN, LC, LPB, RAPR) independently extracted data,  
167 using Covidence and spreadsheet software (Google Sheets). An additional trained analyst from  
168 the group or senior research team member resolved disagreements between individual  
169 judgments.

## 171 Coding and Data Mapping

172 To summarize findings from previous reviews, we first mapped articles according to climate  
173 impacts and health outcomes. To develop the categories of climate impacts and health  
174 outcomes, two researchers (RR and LC) consulted the titles and abstracts of each article. We  
175 started by identifying categories directly based on our data and finalized our categories by  
176 consulting previous conceptual frameworks of climate impacts and health outcomes.<sup>1,22,23</sup> The  
177 same two researchers independently coded each article according to their climate impact and  
178 health outcome. We then compared coding and resolved disagreements through discussion.

179  
180 Next, using spreadsheet software, we created a matrix to map articles according to their  
181 combination of climate impacts and health outcomes. Each health outcome occupied one row,  
182 whereas climate impacts each occupied one column. We placed each article in the matrix  
183 according to the combination(s) of their climate impact(s) and health outcome(s). For instance, if  
184 we coded an article as 'extreme weather' for climate and 'mental health' for health impact, we  
185 noted the reference of this article in the cell at the intersection of these two codes. We  
186 calculated frequencies for each cell to identify frequent combinations and gaps in literature.  
187 Because one study could investigate more than one climate impact and health outcome, the  
188 frequency counts for each category could exceed the number of studies included in this review.

189  
190 Finally, we re-read the Results and Discussion sections of each article to summarize findings of  
191 the studies. We first wrote an individual summary for each study, then we collated the  
192 summaries of all studies exploring the same combination of categories to develop an overall  
193 summary of findings for each combination of categories.

## 194 Quality assessment

195 We used a modified version of AMSTAR-2 to assess the quality of the included systematic  
196 reviews (Appendix 2). The purpose of this assessment was to evaluate the quality of the  
197 included studies as a whole to get a sense of the overall quality of evidence in this field.  
198 Therefore, individual quality scores were not compiled for each article, but scores were  
199 aggregated according to items. Since AMSTAR-2 was developed for syntheses of systematic  
200 reviews of randomized controlled trials, working with a team member with expertise in  
201 knowledge synthesis (AT), we adapted it to suit a research context that is not amenable to  
202 randomized controlled trials. For instance, we changed assessing and accounting for risk of bias  
203 in studies' included randomized controlled trials to assessing and accounting for limitations in  
204 studies' included articles. Complete modifications are presented in Appendix 2.

## 205 Patient and Public Involvement

206 Patients and members of the public were not involved in this study.

## 207 Results

### 208 Articles identified

209 As shown in the PRISMA diagram in Figure 1, from an initial set of 2619 references, we retained  
210 94 for inclusion. More precisely, following screening of titles and abstracts, 146 studies  
211 remained for full text inspection. During full text inspection, we excluded 52 studies, as they did  
212 not report a direct health effect of climate change (n = 17), did not relate to climate change (n =  
213 15), were not systematic reviews (n = 10), or we could not retrieve the full text (n = 10).

214  
215 **Insert Figure 1 About Here**

### 216 Study Descriptions

217 A detailed table of all articles and their characteristics can be found in Appendix 3. Publication  
218 years ranged from 2007 to 2019 (year of data extraction), with the great majority of included  
219 articles (n = 69; 73%) published since 2015 (Figure 2). A median of 30 studies had been  
220 included in the systematic reviews (mean = 60; SD = 49; range 7 to 722). Approximately one  
221 fifth of the systematic reviews included meta-analyses of their included studies (n = 18; 19%).  
222 The majority of included systematic reviews' first authors had affiliations in high-income  
223 countries, with the largest representations by continent in Europe (n = 30) and Australia (n = 24)  
224 (Figure 3). Countries of origin by continents include (from highest to lowest frequency, then by  
225 alphabetical order): Europe (30); United-Kingdom (9), Germany (6), Italy (4), Sweden (4),  
226 Denmark (2), France (2), Georgia (1), Greece (1) and Finland (1); Australia (24); Asia (21);  
227 China (11), Iran (4), India (1), Jordan (1), Korea (1), Nepal (1), Philippines (1), Taiwan (1);  
228 North America (16); United-States (15), Canada (1); Africa (2); Ethiopia (1), Ghana (1), and  
229 South America (1); Brazil (1).

1  
2  
3 231

4 232

**Insert Figure 2 About Here**

5 233

6 234

**Insert Figure 3 About Here**

7 235

8 236

9 237

10 238

11 239

12 240

13 241

14 242

15 243

16 244

17 245

18 246

19 247

20 248

21 249

22 250

23 251

Regarding the geographical focus of systematic reviews, most of the included studies (n = 68; 72%) had a global focus or no specified geographical limitations and therefore included studies published anywhere in the world. The remaining systematic reviews either targeted certain countries (n = 12) (1 for each Australia, Germany, Iran, India, Ethiopia, Malaysia, Nepal, New Zealand and 2 reviews focused on China and the United States), continents (n = 5) (3 focused on Europe and 2 on Asia), or regions according to geographical location (n = 6) (1 focused on Sub-Saharan Africa, 1 on Eastern Mediterranean countries, 1 on Tropical countries, and 3 focused on the Arctic), or according to the country's level of income (n = 3) (2 on low to middle income countries, 1 on high income countries).

Regarding specific populations of interest, most of the systematic reviews did not define a specific population of interest (n = 69; 73%). For the studies that specified a population of interest (n = 25; 26.6%), the most frequent populations were children (n = 7) and workers (n = 6), followed by vulnerable or susceptible populations more generally (n = 4), the elderly (n = 3), pregnant people (n = 2), people with disabilities or chronic illnesses (n = 2) and rural populations (n = 1).

## 252 Quality assessment

253

254

255

256

257

258

259

260

261

262

263

264

265

266

We assessed studies for quality according to our revised AMSTAR-2. Complete scores for each article and each item are available in Appendix 4. Out of 94 systematic reviews, the most commonly fully satisfied criterion was #1 (PICO components) with 81/94 (86%) of included systematic reviews fully satisfying this criterion. The next most commonly-satisfied criteria were #16 (potential sources of conflict of interest reported) (78/94 = 83% fully), #13 (account for limitations in individual studies) (70/94 = 75% fully and 2/94 = 2% partially), #7 (explain both inclusion and exclusion criteria) (64/94 = 68% fully and 19/94 = 20% partially), #8 (description of included studies in adequate detail) (36/94 = 38% fully and 41/94 = 44% partially), and #4 (use of a comprehensive literature search strategy) (0/94 = 0% fully and 80/94 = 85% partially). For criteria #11, #12, and #15, which only applied to reviews including meta-analyses, 17/18 (94%) fully satisfied criterion #11 (use of an appropriate methods for statistical combination of results), 12/18 (67%) fully satisfied criterion #12 (assessment of the potential impact of RoB in individual studies) (1/18 = 6% partially), and 11/18 (61%) fully satisfied criterion #15 (an adequate investigation of publication bias, small study bias).

## 267 Climate Impacts and Health Outcomes

268

269

270

271

Regarding climate impacts, we identified five mutually exclusive categories, with 13 publications targeting more than one category of climate impacts: 1) Meteorological (n = 71 papers) (e.g., temperature, heat waves, humidity, precipitation, sunlight, wind, air pressure), 2) Extreme weather (n = 24) (e.g., water-related, floods, cyclones, hurricanes, drought), 3) Air quality (n = 7)

1  
2  
3 272 (e.g., air pollution and wildfire smoke exposure), 4) General (n = 5), and 5) Other (n = 3).  
4 273 Although heat waves could be considered an extreme weather event, papers investigating heat  
5 274 waves' impact on health were classified in the meteorological impact category, since some of  
6 275 these studies treated them with high temperature. "General" climate impacts included articles  
7 276 that did not specify climate change impacts but stated general climate change as their focus.  
8 277 "Other" climate impacts included studies investigating other effects indirectly related to climate  
9 278 change (e.g., impact of environmental contaminants) or general environmental risk factors (e.g.,  
10 279 environmental hazards, sanitation and access to clean water.)  
11  
12 280

13  
14 281 We identified ten categories to describe the health outcomes studied by the systematic reviews,  
15 282 and 29 publications targeted more than one category of health outcomes: 1) Infectious diseases  
16 283 (n = 41 papers) (vector-, food- and water-borne), 2) Mortality (n = 32), 3) Respiratory,  
17 284 cardiovascular, and neurological (n = 23), 4) Healthcare systems (n = 16), 5) Mental health (n =  
18 285 13), 6) Pregnancy and birth (n = 11), 7) Nutritional (n = 9), 8) Skin diseases and allergies (n =  
19 286 8), 9) Occupational health and injuries (n = 6) and 10) Other health outcomes (n = 17) (e.g.,  
20 287 sleep, arthritis, disability-adjusted life years, non-occupational injuries, etc.)  
21  
22 288

23  
24 289 Figure 4 depicts the combinations of climate impact and health outcome for each study, with  
25 290 Appendix 5 offering further details. The 5 most common combinations are studies investigating  
26 291 the 1) meteorological impacts on infectious diseases (n = 35), 2) mortality (n = 24) and 3)  
27 292 respiratory, cardiovascular, and neurological outcomes (n = 17), 4) extreme weather events'  
28 293 impacts on infectious diseases (n = 14), and 5) meteorological impacts on health systems (n =  
29 294 11).  
30  
31 295

### 32 296 **Insert Figure 4 About Here**

33 297  
34 298 For studies investigating meteorological impacts on health, the three most common health  
35 299 outcomes studied were impacts on 1) infectious diseases (n = 35), 2) mortality (n = 24) and 3)  
36 300 respiratory, cardiovascular, and neurological outcomes (n = 17). Extreme weather event studies  
37 301 most commonly reported health outcomes related to 1) infectious diseases (n = 14), 2) mental  
38 302 health outcomes (n = 9) and 3) nutritional outcomes (n = 6) and other health outcomes (e.g.,  
39 303 injuries, sleep) (n = 6). Studies focused on the impact of air quality were less frequent and  
40 304 explored mostly health outcomes linked to 1) respiratory, cardiovascular, and neurological  
41 305 outcomes (n = 6), 2) mortality (n = 5) and 3) pregnancy and birth outcomes (n = 3).  
42  
43  
44  
45

## 46 306 **Summary of Findings**

47 307 Most reviews suggest a deleterious impact of climate change on multiple adverse health  
48 308 outcomes, with some associations being explored and/or supported with consistent findings  
49 309 more often than others. Some reviews also report conflicting findings or an absence of  
50 310 association between the climate impact and health outcome studied (see Table 1 for a detailed  
51 311 summary of findings according to health outcomes).  
52  
53 312

54  
55 313 Notable findings of health outcomes according to climate impact include the following. For  
56 314 meteorological factors (n = 71), temperature and humidity are the variables most often studied  
57  
58  
59

1  
2  
3 315 and report the most consistent associations with infectious diseases and respiratory,  
4 316 cardiovascular, and neurological outcomes. Temperature is also consistently associated with  
5 317 mortality and healthcare service use. Some associations are less frequently studied, but remain  
6 318 consistent, including the association between some meteorological factors (e.g., temperature  
7 319 and heat) and some adverse mental health outcomes (e.g., hospital admissions for mental  
8 320 health reasons, suicide, exacerbation of previous mental health conditions), and the association  
9 321 between heat and adverse occupational outcomes and some adverse birth outcomes.  
10 322 Temperature is also associated with adverse nutritional outcomes (likely via crop production and  
11 323 food insecurity) and temperature and humidity are associated with some skin diseases and  
12 324 allergies. Some health outcomes are less frequently studied, but studies suggest an association  
13 325 between temperature and diabetes, impaired sleep, cataracts, heat stress, heat exhaustion and  
14 326 renal diseases.  
15  
16  
17  
18

19 328 Extreme weather events (n = 24) are consistently associated with mortality, some mental health  
20 329 outcomes (e.g., distress, anxiety, depression) and adverse nutritional outcomes (likely via crop  
21 330 production and food insecurity). Some associations are explored less frequently, but these  
22 331 studies suggest an association between drought and respiratory and cardiovascular outcomes  
23 332 (likely via air quality), between extreme weather events and an increased use of healthcare  
24 333 services and some adverse birth outcomes (likely due to indirect causes, such as experiencing  
25 334 stress). Some health outcomes are less frequently studied, but studies suggest an association  
26 335 between extreme weather events and injuries, impaired sleep, esophageal cancer and  
27 336 exacerbation of chronic illnesses. There are limited and conflicting findings for the association  
28 337 between extreme weather events and infectious diseases, as well as for certain mental health  
29 338 outcomes (e.g., suicide and substance abuse). At times, different types of extreme weather  
30 339 events (e.g., drought vs flood) led to conflicting findings for some health outcomes (e.g., mental  
31 340 health outcomes, infectious diseases), but for other health outcomes, the association was  
32 341 consistent independently of the extreme weather event studied (e.g., mortality, healthcare  
33 342 service use and nutritional outcomes).  
34  
35  
36  
37

38 344 The impact of air quality on health (n = 7) was less frequently studied, but the few studies  
39 345 exploring this association report consistent findings regarding an association with respiratory-  
40 346 specific mortality, adverse respiratory outcomes and an increase in healthcare service use.  
41 347 There is limited evidence regarding the association between air quality and cardiovascular  
42 348 outcomes, limited and inconsistent evidence between wildfire smoke exposure and adverse  
43 349 birth outcomes, and no association is found between exposure to wildfire smoke and increase in  
44 350 use of health services for mental health reasons. Only one review explored the impact of wildfire  
45 351 smoke exposure on ophthalmic outcomes, and it suggests that it may be associated with eye  
46 352 irritation and cataracts.  
47  
48  
49

50 354 Reviews which stated climate change as their general focus and did not specify the climate  
51 355 impact(s) under study were less frequent (n = 5), but they suggest an association between  
52 356 climate change and pollen allergies in Europe, increased use of healthcare services, obesity,  
53 357 skin diseases and allergies and an association with disability-adjusted life years. Reviews  
54 358 investigating the impact of other climate-related factors (n = 3) show inconsistent findings  
55  
56  
57  
58  
59  
60



359 concerning the association between environmental pollutant and adverse birth outcomes, and  
 360 two reviews suggest an association between environmental risk factors and pollutants and  
 361 childhood stunting and occupational diseases.

362  
 363 Most reviews concluded by calling for more research, noting the limitations observed among the  
 364 studies included in their reviews, as well as limitations in their reviews themselves. These  
 365 limitations included, amongst others, some systematic reviews having a small number of  
 366 publications,<sup>24,25</sup> language restrictions such as including only papers in English,<sup>26,27</sup> arriving at  
 367 conflicting evidence,<sup>28</sup> difficulty concluding a strong association due to the heterogeneity in  
 368 methods and measurements or the limited equipment and access to quality data in certain  
 369 contexts,<sup>24,29–31</sup> and most studies included were conducted in high-income countries.<sup>32,33</sup>

370  
 371 Previous authors also discussed the important challenge related to exploring the relationship  
 372 between climate change and health. Not only is it difficult to explore the potential causal  
 373 relationship between climate change and health, mostly due to methodological challenges, but  
 374 there are also a wide variety of complex causal factors that may interact to determine health  
 375 outcomes. Therefore, the possible causal mechanisms underlying these associations were at  
 376 times still unknown or uncertain and the impacts of some climate factors were different  
 377 according to geographical location and specificities of the context. Nonetheless, some reviews  
 378 offered potential explanations for the climate-health association, with the climate factor at times,  
 379 having a direct impact on health (e.g., flooding causing injuries, heat causing dehydration) and  
 380 in other cases, having an indirect impact (e.g., flooding causing stress which in turn may cause  
 381 adverse birth outcomes, heat causing difficulty concentrating leading to occupational injuries.)

382  
 383 **Table 1.** Summary of findings from systematic reviews according to health outcome and climate  
 384 impact. Reviews that covered multiple climate impacts are listed in each relevant category.

| Climate Impact                                   | F | Summary of Findings |
|--------------------------------------------------|---|---------------------|
| <b>Infectious diseases (n = 41)</b>              |   |                     |
| <i>Vector borne infectious diseases (n = 25)</i> |   |                     |

|                                                          |    |                                                                                                                                                                                                                                                                                                                                                                                                                                                                                                                                                                                                                                                                                                                                                                                                                                                                                                                                                                                   |
|----------------------------------------------------------|----|-----------------------------------------------------------------------------------------------------------------------------------------------------------------------------------------------------------------------------------------------------------------------------------------------------------------------------------------------------------------------------------------------------------------------------------------------------------------------------------------------------------------------------------------------------------------------------------------------------------------------------------------------------------------------------------------------------------------------------------------------------------------------------------------------------------------------------------------------------------------------------------------------------------------------------------------------------------------------------------|
| Meteorological                                           | 22 | Systematic reviews suggest that meteorological factors, such as temperature, precipitation, humidity, and wind, are associated with diverse vector-borne infectious diseases, including malaria and dengue. <sup>9,12,26,29,31,34–50</sup> This association was mostly proportional (e.g., higher temperature and increased rainfall associated with vector-borne diseases), although findings were at times conflicting, with some suggesting an inversely proportional association <sup>12</sup> (e.g., decreased rainfall) or no association at all <sup>39</sup> (e.g., with the human puumala hantavirus Infection.) Geographic location, seasonality and potential interaction with other climate-related factors may partly explain these inconsistencies. <sup>12,29</sup> Temperature, humidity and rainfall were the most common and important meteorological factors reported by reviews and factors such as wind, air pressure and sunshine were reported less often. |
| Extreme weather                                          | 7  | There are limited and conflicting findings concerning the association of extreme weather events with vector-borne diseases. Some reviews suggest water-related extreme events <sup>51</sup> and flooding <sup>6,31,52</sup> are associated with an increased risk of vector-borne diseases, while drought is associated with a reduction of dengue incidence. <sup>12</sup> Other reviews focused specifically on Puerto Rico <sup>43</sup> and Australia <sup>53</sup> did not find an association between hurricanes and/or floods and mosquito-borne disease transmission.                                                                                                                                                                                                                                                                                                                                                                                                     |
| <i>Food and water borne infectious diseases (n = 19)</i> |    |                                                                                                                                                                                                                                                                                                                                                                                                                                                                                                                                                                                                                                                                                                                                                                                                                                                                                                                                                                                   |
| Meteorological                                           | 14 | Reviews suggest that meteorological factors, such as temperature, precipitation, and humidity, are associated with diverse food- and water-borne infectious diseases, in particular, cholera, schistosomiasis, salmonella and E. coli gastroenteritis. <sup>11,31,40,42,45,48,54–61</sup> Overall, higher temperatures and humidity, <sup>11,40,54,58</sup> along with lower precipitation <sup>42,61</sup> was associated with these infectious diseases. Directionality and strength of the association seemed to vary according to disease and pathogens, <sup>59</sup> seasons, and geographic region. <sup>56</sup>                                                                                                                                                                                                                                                                                                                                                          |
| Extreme weather                                          | 10 | Reviews suggest a proportional association between extreme water-related events, <sup>47,51,62</sup> such as flooding <sup>6,40,52</sup> and heavy rainfall <sup>34</sup> , and food- and water-borne diseases, including diarrhea, food contamination, cholera. <sup>6,31,34,40,45,47,51,52,57,62</sup> Drought may also be proportionally associated with food- and water-borne disease, <sup>34,63</sup> but these associations are less consistent than those with water-related extreme events. <sup>57</sup>                                                                                                                                                                                                                                                                                                                                                                                                                                                                |
| <i>Other infectious diseases (n = 8)</i>                 |    |                                                                                                                                                                                                                                                                                                                                                                                                                                                                                                                                                                                                                                                                                                                                                                                                                                                                                                                                                                                   |

|                                                               |    |                                                                                                                                                                                                                                                                                                                                                                                                                                                                                                                                                                                                                                                                                                                                                                                                                                                                                                                                                                                                                                                                                                                                                                                                                         |
|---------------------------------------------------------------|----|-------------------------------------------------------------------------------------------------------------------------------------------------------------------------------------------------------------------------------------------------------------------------------------------------------------------------------------------------------------------------------------------------------------------------------------------------------------------------------------------------------------------------------------------------------------------------------------------------------------------------------------------------------------------------------------------------------------------------------------------------------------------------------------------------------------------------------------------------------------------------------------------------------------------------------------------------------------------------------------------------------------------------------------------------------------------------------------------------------------------------------------------------------------------------------------------------------------------------|
| Meteorological                                                | 8  | Reviews suggest an association of most meteorological factors, such as temperature and humidity, with various other infectious diseases, including meningitis, <sup>24,34</sup> Ebola, <sup>24</sup> influenza, <sup>31</sup> and pediatric infectious diseases such as hand-foot-and-mouth disease. <sup>7,8,30,49,55</sup> This association was mostly proportional for meteorological factors such as temperature, <sup>7,8,49</sup> diurnal temperature range, <sup>30</sup> and humidity, <sup>7,8,31</sup> although some meteorological factors, such as air pressure <sup>8</sup> and lower temperatures <sup>31,49</sup> were inversely proportional to these diseases. Some conflicting evidence is reported concerning the association with some meteorological factors, such as sunshine with hand-foot-and-mouth disease, <sup>7,8</sup> and humidity and pediatric infectious diseases. <sup>55</sup> No association was found between some meteorological factors, such as precipitation, wind speed and sunshine with hand-foot-and-mouth disease. <sup>7,8</sup>                                                                                                                                        |
| <b>Mortality (n = 32)</b>                                     |    |                                                                                                                                                                                                                                                                                                                                                                                                                                                                                                                                                                                                                                                                                                                                                                                                                                                                                                                                                                                                                                                                                                                                                                                                                         |
| Meteorological                                                | 24 | Reviews suggest that temperature (high, low, or diurnal range) was consistently associated with all-cause and cause-specific mortality. <sup>24–26,30,33,42,45,47,49,64–77</sup> A strong association was reported between heat (including heat waves) and mortality (all-cause), <sup>64</sup> heat-, <sup>42,69</sup> stroke-, <sup>24,70</sup> cardiovascular-, <sup>33,47</sup> and respiratory-related, <sup>26,33,71</sup> especially in rural, <sup>68</sup> very young children <sup>49</sup> and ageing populations. <sup>25</sup> Mortality seems to be the most frequent health outcome studied in association with heatwaves. <sup>65</sup> Inconsistent results are found concerning the association between heat and childhood mortality. <sup>75</sup> Due to limited evidence, this association was weaker in some geographical regions. <sup>24,72</sup> Also, heat wave intensity (compared to duration) was more strongly associated with heat-related mortality. <sup>76</sup> Finally, although less studied, low temperature was also associated with mortality, <sup>49,77</sup> specifically respiratory, <sup>64</sup> stroke, <sup>70</sup> and cardiovascular mortality. <sup>47,67,71</sup> |
| Extreme Weather                                               | 5  | Reviews suggest an association between extreme weather events such as floods, <sup>6</sup> droughts, <sup>63</sup> cyclones <sup>78</sup> and other water-related events, <sup>26,51</sup> with direct (e.g., drowning) and indirect long-term mortality (e.g., due to malnutrition, environmental toxin exposure, armed conflict, etc.). <sup>6,51,63,78</sup>                                                                                                                                                                                                                                                                                                                                                                                                                                                                                                                                                                                                                                                                                                                                                                                                                                                         |
| Air quality                                                   | 5  | Reviews suggest an association between exposure to air pollution <sup>26,79</sup> or wildfire smoke <sup>80–82</sup> and air pollution related-mortality, such as respiratory-specific mortality. There is currently limited evidence, but reviews suggest a potential association between wildfire smoke exposure and cardiovascular-specific mortality. <sup>80–82</sup>                                                                                                                                                                                                                                                                                                                                                                                                                                                                                                                                                                                                                                                                                                                                                                                                                                              |
| <b>Respiratory, neurological, and cardiovascular (n = 23)</b> |    |                                                                                                                                                                                                                                                                                                                                                                                                                                                                                                                                                                                                                                                                                                                                                                                                                                                                                                                                                                                                                                                                                                                                                                                                                         |
| General                                                       | 1  | A review suggests a proportional association between climate change, in general, and ragweed pollen allergies in Europe. <sup>83</sup>                                                                                                                                                                                                                                                                                                                                                                                                                                                                                                                                                                                                                                                                                                                                                                                                                                                                                                                                                                                                                                                                                  |

|                                |    |                                                                                                                                                                                                                                                                                                                                                                                                                                                                                                                                                                                                                                                                                                                                                                                                                                                                                                                                                                                                                                                                                                                                        |
|--------------------------------|----|----------------------------------------------------------------------------------------------------------------------------------------------------------------------------------------------------------------------------------------------------------------------------------------------------------------------------------------------------------------------------------------------------------------------------------------------------------------------------------------------------------------------------------------------------------------------------------------------------------------------------------------------------------------------------------------------------------------------------------------------------------------------------------------------------------------------------------------------------------------------------------------------------------------------------------------------------------------------------------------------------------------------------------------------------------------------------------------------------------------------------------------|
| Meteorological                 | 17 | Reviews suggest an association between meteorological factors, such as temperature and humidity, and cardiovascular, respiratory and neurological outcomes. <sup>24,26,30,33,36,45,49,55,64,67,69,70,74,75,84–86</sup> Exposure to high temperatures and extreme heat are associated to cardiovascular and respiratory diseases, <sup>24,26,36,49,67</sup> stroke, <sup>70</sup> long-term neurological outcomes (due to heat strokes), <sup>69</sup> myocardial infarction, <sup>33,85</sup> and childhood asthma and pediatric respiratory diseases. <sup>75,86</sup> A review also suggests a beneficial association between heat and the shortening of a respiratory virus season. <sup>45</sup> Exposure to low temperature (cold), temperature drop, or diurnal temperature range was associated with cardiovascular and respiratory diseases, <sup>30,64,67</sup> stroke, <sup>70</sup> and myocardial infarctions. <sup>33</sup> Humidity (most often high humidity, but also lower humidity) and low temperatures were also associated with respiratory diseases in children, including childhood asthma. <sup>55,84,86</sup> |
| Extreme Weather                | 1  | A previous review suggests an association between drought and respiratory and cardiovascular outcomes, most likely due to droughts leading to increased dust in the air. <sup>63</sup>                                                                                                                                                                                                                                                                                                                                                                                                                                                                                                                                                                                                                                                                                                                                                                                                                                                                                                                                                 |
| Air quality                    | 6  | Reviews suggest a proportional association between exposure to air pollution <sup>26,42,45</sup> or wildfire smoke exposure <sup>80–82</sup> and respiratory outcomes, including asthma, chronic obstructive pulmonary disease, coughing, wheezing, and overall lung function. Although there is currently limited evidence, <sup>80</sup> reviews also suggest a potential association between air pollution or wildfire smoke exposure and cardiovascular outcomes. <sup>45,81,82</sup>                                                                                                                                                                                                                                                                                                                                                                                                                                                                                                                                                                                                                                              |
| <b>Health systems (n = 16)</b> |    |                                                                                                                                                                                                                                                                                                                                                                                                                                                                                                                                                                                                                                                                                                                                                                                                                                                                                                                                                                                                                                                                                                                                        |
| General                        | 1  | A previous review suggests that climate change in general puts a strain on public health resources, via population health issues and shows that using an integrated surveillance system may guide future adaptation to climate change. <sup>87</sup>                                                                                                                                                                                                                                                                                                                                                                                                                                                                                                                                                                                                                                                                                                                                                                                                                                                                                   |
| Meteorological                 | 11 | Previous reviews suggest an association between temperature change <sup>30</sup> extreme heat, aridity and cold temperatures and an increase in use of healthcare services (mostly linked to heat-related health impacts), such as an increase in emergency department visits, hospital admissions and use of ambulances. <sup>24,26,30,33,42,49,65,72,75,85,88</sup>                                                                                                                                                                                                                                                                                                                                                                                                                                                                                                                                                                                                                                                                                                                                                                  |
| Extreme weather                | 2  | Reviews suggest that extreme weather events <sup>32</sup> and flooding <sup>6</sup> may be associated with an increase in use of healthcare services (e.g., increased hospitalizations) and a compromised quality of care as extreme weather events may lead to power outages. <sup>32</sup>                                                                                                                                                                                                                                                                                                                                                                                                                                                                                                                                                                                                                                                                                                                                                                                                                                           |
| Air quality                    | 2  | Reviews suggest an association between wildfire smoke exposure and an increase in use of healthcare services, such as an increase in emergency department visits. <sup>80,82</sup>                                                                                                                                                                                                                                                                                                                                                                                                                                                                                                                                                                                                                                                                                                                                                                                                                                                                                                                                                     |
| <b>Mental health (n = 13)</b>  |    |                                                                                                                                                                                                                                                                                                                                                                                                                                                                                                                                                                                                                                                                                                                                                                                                                                                                                                                                                                                                                                                                                                                                        |

|                                              |   |                                                                                                                                                                                                                                                                                                                                                                                                                                                                                                                                                    |
|----------------------------------------------|---|----------------------------------------------------------------------------------------------------------------------------------------------------------------------------------------------------------------------------------------------------------------------------------------------------------------------------------------------------------------------------------------------------------------------------------------------------------------------------------------------------------------------------------------------------|
| Meteorological                               | 3 | Reviews suggest an association of most meteorological factors such as temperature increase, aridity, heat, and heat waves with mental health outcomes, including hospital admissions for mental health reasons, <sup>42</sup> suicide, <sup>89</sup> and exacerbation of pre-existing mental health conditions, difficulty sleeping, and fatigue. <sup>85</sup> No association was found between sunlight duration and suicide incidence. <sup>89</sup>                                                                                            |
| Extreme weather                              | 9 | Most reviews reported a proportional association of extreme weather events, <sup>45,51,90,91</sup> flooding, <sup>6,26,92</sup> and drought <sup>63,93</sup> with diverse mental health issues, including, psychological distress, post-traumatic stress disorder, anxiety, depression, psychotropic medication use, alcohol consumption. There was conflicting evidence regarding the association of floods with suicide, tobacco, alcohol and substance abuse. <sup>92</sup> No association was found between drought and suicide. <sup>63</sup> |
| Air quality                                  | 1 | A previous review suggests no association between wildfire smoke exposure and mental health, as measured by physician visits and hospitalizations for mental health reasons during wildfires. <sup>81</sup>                                                                                                                                                                                                                                                                                                                                        |
| <b>Pregnancy and birth outcomes (n = 11)</b> |   |                                                                                                                                                                                                                                                                                                                                                                                                                                                                                                                                                    |
| Meteorological                               | 5 | Reviews suggest that adverse birth outcomes may be higher among people exposed to meteorological factors such as high temperature, heat, sunlight intensity, cold and humidity. <sup>42,94–97</sup> These outcomes include low birth weight, preterm birth, eclampsia and preeclampsia, hypertension and length of pregnancy. <sup>42,94–97</sup> The association between heat and adverse birth outcomes seems to have stronger support than the association with cold temperatures. <sup>97</sup>                                                |
| Extreme Weather                              | 2 | Reviews suggest a potential association of extreme weather events <sup>90</sup> and flooding <sup>6</sup> with adverse birth outcomes, such as low birth weight, preterm birth and pre-eclampsia. It is suggested that extreme weather events may indirectly affect birth outcomes via the pregnant person's well-being (e.g., stress and worry during pregnancy.) <sup>6,90</sup>                                                                                                                                                                 |
| Air quality                                  | 3 | There is limited and inconsistent evidence concerning the association between wildfire smoke exposure and adverse birth outcomes, but reviews suggest a potential proportional association between wildfire smoke exposure and lower birth weight. <sup>80–82</sup>                                                                                                                                                                                                                                                                                |
| Other                                        | 1 | The association between environmental pollutants and adverse birth outcomes (i.e., preterm birth) remains unclear due to conflicting evidence. <sup>28</sup>                                                                                                                                                                                                                                                                                                                                                                                       |
| <b>Nutritional (n = 9)</b>                   |   |                                                                                                                                                                                                                                                                                                                                                                                                                                                                                                                                                    |
| General                                      | 1 | A review suggests an association between climate change and obesity. <sup>98</sup>                                                                                                                                                                                                                                                                                                                                                                                                                                                                 |
| Meteorological                               | 4 | Reviews suggest an association between meteorological factors, such as changes in temperature, heat and precipitation, with diverse nutritional outcomes, including undernutrition, malnutrition and child stunting. <sup>24,27,42,72</sup> This association may be                                                                                                                                                                                                                                                                                |

|                                                 |   |                                                                                                                                                                                                                                                                                                                                                                                                                                                                                                                                                                                                                  |
|-------------------------------------------------|---|------------------------------------------------------------------------------------------------------------------------------------------------------------------------------------------------------------------------------------------------------------------------------------------------------------------------------------------------------------------------------------------------------------------------------------------------------------------------------------------------------------------------------------------------------------------------------------------------------------------|
|                                                 |   | explained by the impact of meteorological factors, such as temperature increase and precipitation decrease, on crop production and food insecurity. <sup>42,72</sup>                                                                                                                                                                                                                                                                                                                                                                                                                                             |
| Extreme Weather                                 | 6 | Reviews suggest an association between extreme weather events, such as flooding and droughts, <sup>63</sup> and diverse nutritional outcomes, including malnutrition and undernutrition in children and adults <sup>27,34,42,45,47</sup> via, amongst others, crops production and food insecurity (e.g., low food aid following flooding <sup>42</sup> ).                                                                                                                                                                                                                                                       |
| Other                                           | 1 | A review suggests a potential association between certain environmental risk factors (e.g., sanitation, cooking fuels and food-borne mycotoxins), and childhood stunting, which could be aggravated by climate change. <sup>99</sup>                                                                                                                                                                                                                                                                                                                                                                             |
| <b>Skin diseases and allergies (n = 8)</b>      |   |                                                                                                                                                                                                                                                                                                                                                                                                                                                                                                                                                                                                                  |
| General                                         | 1 | A review suggests a potential proportional association between climate change, in general, and skin and soft tissue infections (e.g., fatal vibrio vulnificus necrotizing). <sup>100</sup>                                                                                                                                                                                                                                                                                                                                                                                                                       |
| Meteorological                                  | 7 | Reviews suggest an association of meteorological factors, such as ultraviolet light exposure, temperature and humidity, with diverse skin diseases and allergies, including skin cancer, sunburn, acute urticaria, eczema and pediatric skin irritabilities. <sup>24,45,47,49,55,85,101</sup> Higher temperature and ultraviolet light exposure is proportionally associated with sunburn <sup>85</sup> and skin cancer, <sup>45,101</sup> while low humidity and low temperatures were associated with eczema and skin irritabilities in children. <sup>49,55</sup>                                             |
| <b>Occupational health and injuries (n = 6)</b> |   |                                                                                                                                                                                                                                                                                                                                                                                                                                                                                                                                                                                                                  |
| Meteorological                                  | 6 | Reviews suggest that heat is associated with adverse occupational health outcomes, including injuries (e.g., slips, trips, falls, wounds, lacerations and amputations), heat strain, dehydration and kidney diseases. <sup>102-107 103</sup> This association was found in many occupational settings, including agriculture, construction, transport and fishing, and seems to affect both outdoor and indoor workers. <sup>102</sup> This association may be explained by a combination of direct (e.g., dehydration) and indirect factors (e.g., impaired cognitive and physical performance.) <sup>106</sup> |
| Other                                           | 1 | A review suggests a potential association between environmental pollution (e.g., heavy metals, fertilizers, etc.) and occupational diseases, such as chronic kidney disease. <sup>107</sup> This association is suggested to be affected by increasing temperatures.                                                                                                                                                                                                                                                                                                                                             |
| <b>Other (n = 17)</b>                           |   |                                                                                                                                                                                                                                                                                                                                                                                                                                                                                                                                                                                                                  |

|                 |    |                                                                                                                                                                                                                                                                                                                                                                                                                                                                                                                                                                                                                                                    |
|-----------------|----|----------------------------------------------------------------------------------------------------------------------------------------------------------------------------------------------------------------------------------------------------------------------------------------------------------------------------------------------------------------------------------------------------------------------------------------------------------------------------------------------------------------------------------------------------------------------------------------------------------------------------------------------------|
| General         | 1  | A review suggests a potential association between climate change in general and disability-adjusted life years, which is an indicator that quantifies 'the burden of disease attributable to climate change'. <sup>108</sup> Authors suggest that the cost of disability-adjusted life years could be high, especially in low to middle income countries.                                                                                                                                                                                                                                                                                          |
| Meteorological  | 10 | Reviews suggests an association between increasing temperatures and temperature changes, <sup>30</sup> and other various health outcomes, including acute gouty arthritis, <sup>109</sup> unintentional injuries, <sup>110</sup> diabetes, <sup>64</sup> genitourinary diseases, <sup>30,64</sup> impaired sleep time and quality, <sup>111</sup> cataracts (indirectly associated via people spending more time outside and therefore increased exposure to ultraviolet light), <sup>45,47</sup> heat stress, heat exhaustion and kidney failure, <sup>85</sup> and renal diseases, fever and electrolyte imbalance in children. <sup>49,75</sup> |
| Extreme weather | 6  | Reviews suggests an association between extreme weather events, <sup>91</sup> such as flooding, <sup>6</sup> cyclones, <sup>78</sup> hurricanes, <sup>111</sup> and drought, <sup>63</sup> and other various health outcomes including injuries (e.g., debris, diving in water that is shallower than expected), <sup>6,63,78,91</sup> impaired sleep, <sup>111</sup> esophageal cancer (likely linked to high salinity of water due to droughts), <sup>63</sup> and exacerbation of chronic illnesses. <sup>6,90</sup>                                                                                                                            |
| Air quality     | 1  | There is limited evidence, but a systematic review suggests a potential association between wildfire smoke exposure and ophthalmic outcomes, such as eye irritation and cataracts. <sup>80</sup>                                                                                                                                                                                                                                                                                                                                                                                                                                                   |

## 385 Discussion

### 386 Principal results

387 In this overview of systematic reviews, we aimed to develop a synthesis of systematic reviews  
 388 of health impacts of climate change by mapping the characteristics and findings of studies  
 389 exploring the relationship between climate change and health. We identified four key findings.

390  
 391 First, meteorological impacts, mostly related to temperature and humidity, were the most  
 392 common impacts studied by included publications, which aligns with findings from a previous  
 393 scoping review on the health impacts of climate change in the Philippines.<sup>10</sup> Indeed,  
 394 meteorological factors' impact on all health outcomes identified in this review are explored,  
 395 although some health outcomes are more rarely explored (e.g., mental health and nutritional  
 396 outcomes). Although this may not be surprising given that a key implication of climate change is  
 397 the long-term meteorological impact of temperature rise, this finding suggests we also need to  
 398 undertake research focused on other climate impacts on health, including potential direct and  
 399 indirect effects of temperature rise, such as the impact of droughts and wildfire smoke. This will  
 400 allow us to better prepare for the health crises that arise from these ever-increasing climate-  
 401 related impacts. For instance, the impacts of extreme weather events and air quality on certain  
 402 health outcomes are not explored (e.g., skin diseases and allergies, occupational health) or only  
 403 rarely explored (e.g., pregnancy outcomes).

1  
2  
3 404  
4 405 Second, systematic reviews primarily focus on physical health outcomes, such as infectious  
5 406 diseases, mortality, and respiratory, cardiovascular and neurological outcomes, which also  
6 407 aligns with the country-specific previous scoping review.<sup>10</sup> Regarding mortality, we support  
7 408 Campbell and colleagues'<sup>65</sup> suggestion that we should expand our focus to include other types  
8 409 of health outcomes. This will provide better support for mitigation policies and allow us to adapt  
9 410 to the full range of threats of climate change.  
10  
11 411

12 412 Moreover, it is unclear whether the distribution of frequencies of health outcomes reflects the  
13 413 actual burden of health impacts of climate change. The most commonly-studied health  
14 414 outcomes do not necessarily reflect the definition of health presented by the WHO as, "a state of  
15 415 complete physical, mental and social well-being and not merely the absence of disease or  
16 416 infirmity."<sup>20</sup> This suggests that future studies should investigate in greater depth the impacts of  
17 417 climate change on mental and broader social well-being. Indeed, some reviews suggested that  
18 418 climate change impacts psychological and social well-being, via broader consequences, such  
19 419 as political instability, health system capacity, migration, and crime,<sup>3,4,85,90</sup> thus illustrating how  
20 420 our personal health is determined not only by biological and environmental factors but also by  
21 421 social and health systems. The importance of expanding our scope of health in this field is also  
22 422 recognized in the most recent Lancet report, which states that future reports will include a new  
23 423 mental health indicator.<sup>2</sup>  
24 424

25 425 Interestingly, the reviews that explored the mental health impacts of climate change were  
26 426 focused mostly on the direct and immediate impacts of experiencing extreme weather events.  
27 427 However, psychologists are also warning about the long-term indirect mental health impacts of  
28 428 climate change, which are becoming more prevalent for children and adults alike (e.g., eco-  
29 429 anxiety, climate depression).<sup>112,113</sup> Even people who do not experience direct climate impacts,  
30 430 such as extreme weather events, report experiencing distressing emotions when thinking of the  
31 431 destruction of our environment or when worrying about one's uncertain future and the lack of  
32 432 actions being taken. To foster emotional resilience in the face of climate change, these mental  
33 433 health impacts of climate change need to be further explored. Humanity's ability to adapt to and  
34 434 mitigate climate change ultimately depends on our emotional capacity to face this threat.  
35 435

36 436 Third, there is a notable geographic difference in the country affiliations of first authors, with  
37 437 three quarters of systematic reviews having been led by first authors affiliated to institutions in  
38 438 Europe, Australia, or North America, which aligns with the findings of the most recent Lancet  
39 439 report.<sup>2</sup> While perhaps unsurprising given the inequalities in research funding and institutions  
40 440 concentrated in Western countries, this is of critical importance given the significant health  
41 441 impacts that are currently faced (and will remain) in other parts of the world. Research funding  
42 442 organizations should seek to provide more resources to authors in low- to middle-income  
43 443 countries to ensure their expertise and perspectives are better represented in the literature.  
44 444

45 445 Fourth, overall, most reviews suggest an association between climate change and the  
46 446 deterioration of health in various ways, illustrating the interdependence of our health and well-  
47 447 being with the well-being of our environment. This interdependence may be direct (e.g., heat's  
48  
49  
50  
51  
52  
53  
54  
55  
56  
57  
58  
59  
60



1  
2  
3 448 impact on dehydration and exhaustion) or indirect (e.g., via behavior change due to heat.) The  
4 449 most frequently-explored and consistently-supported associations include an association  
5 450 between temperature and humidity with infectious diseases, mortality, and adverse respiratory,  
6 451 cardiovascular and neurological outcomes. Other less frequently studied but consistent  
7 452 associations include associations between climate impacts and increased use of healthcare  
8 453 services, some adverse mental health outcomes, adverse nutritional outcomes, and adverse  
9 454 occupational health outcomes. These associations support key findings of the most recent  
10 455 Lancet report, in which authors report, amongst others, increasing heat exposure being  
11 456 associated with increasing morbidities and mortality, climate change leading to food insecurity  
12 457 and undernutrition, and to an increase in infectious disease transmission.<sup>2</sup>  
13 458

14 459 That said, a number of reviews included in this study reported limited, conflicting and/or an  
15 460 absence of evidence regarding the association between the climate impact and health outcome.  
16 461 For instance, there was conflicting or limited evidence concerning the association between  
17 462 extreme weather events and infectious diseases, cardiorespiratory outcomes and some mental  
18 463 health outcomes and the association between air quality and cardiovascular-specific mortality  
19 464 and adverse birth outcomes. These conflicting and limited findings highlight the need for further  
20 465 research. These associations are complex and there exist important methodological challenges  
21 466 inherent to exploring the causal relationship between climate change and health outcomes. This  
22 467 relationship may at times be indirect and likely determined by multiple interacting factors.  
23 468

24 469 The climate-health link has been the target of more research in recent years and it is also  
25 470 receiving increasing attention from the public and in both public health and climate  
26 471 communication literature.<sup>2,114–116</sup> However, the health framing of climate change information is  
27 472 still underused in climate communications, and researchers suggest we should be doing more  
28 473 to make the link between human health and climate change more explicit to increase  
29 474 engagement with the climate crisis.<sup>2,116–118</sup> The health framing of climate communication also  
30 475 has implications for healthcare professionals<sup>119</sup> and policymakers, as these actors could play a  
31 476 key part in climate communication, adaptation, and mitigation.<sup>116,117,120</sup> These key stakeholders'  
32 477 perspectives on the climate-health link, as well as their perceived role in climate adaptation and  
33 478 mitigation could be explored,<sup>121</sup> since research suggests that health professionals are important  
34 479 voices in climate communications<sup>119</sup> and especially since, ultimately, these adverse health  
35 480 outcomes will engender pressure on and cost to our health systems and health workers.  
36 481

## 37 481 Strengths and Limitations

38 482 To the best of our knowledge, the current study provides the first broad overview of previous  
39 483 systematic reviews exploring the health impacts of climate change. Our review has three main  
40 484 strengths. First, by targeting systematic reviews, we achieve a higher-order summary of findings  
41 485 than what would have been possible by consulting individual original studies. Second, by  
42 486 synthesizing findings across all included studies and according to the combination of climate  
43 487 impact and health outcome, we offer a clear, detailed, and unique summary of the current state  
44 488 of evidence and knowledge gaps about how climate change may influence human health. This  
45 489 summary may be of use to researchers, policymakers, and communities. Third, we included  
46  
47  
48  
49  
50  
51  
52  
53  
54  
55  
56  
57  
58  
59  
60

1  
2  
3 490 studies published in all languages about any climate impact and any health outcome. In doing  
4 491 so, we provide a comprehensive and robust overview.

5 492  
6  
7 493 Our work has four main limitations. First, we were unable to access some full texts and  
8 494 therefore some studies were excluded, even though we deemed them potentially relevant after  
9 495 title and abstract inspection. Other potentially relevant systematic reviews may be missing due  
10 496 to unseen flaws in our systematic search. Second, due to the heterogeneity of the included  
11 497 systematic reviews and the relatively small proportion of studies reporting meta-analytic  
12 498 findings, we could not conduct meta-meta-analyses of findings across reviews. Future research  
13 499 is needed to quantify the climate and health links described in this review, as well as to  
14 500 investigate the causal relationship and other interacting factors. Third, due to limited resources,  
15 501 we did not assess overlap between the included reviews concerning the studies they included.  
16 502 Frequencies and findings should be interpreted with potential overlap in mind. Fourth, we  
17 503 conducted the systematic search of the literature in June 2019, and it is therefore likely that  
18 504 some recent systematic reviews are not included in this study.

## 21 22 23 505 **Conclusions**

24  
25 506 Overall, most systematic reviews of the health impacts of climate change suggest an  
26 507 association between climate change and the deterioration of health in multiple ways, generally  
27 508 in the direction that climate change is associated with adverse human health outcomes. This is  
28 509 worrisome since these outcomes are predicted to rise in the near future, due to the rise in  
29 510 temperature and increase in climate-change-related events such as extreme weather events  
30 511 and worsened air quality. Most studies included in this review focused on meteorological  
31 512 impacts of climate change on adverse physical health outcomes. Future studies could fill  
32 513 knowledge gaps by exploring other climate-related impacts and broader psychosocial health  
33 514 outcomes. Moreover, studies on health impacts of climate change have mostly been conducted  
34 515 by first authors affiliated with institutions in high-income countries. This inequity needs to be  
35 516 addressed, considering that the impacts of climate change are and will continue to  
36 517 predominantly impact lower-income countries. Finally, although most reviews also recommend  
37 518 more research to better understand and quantify these associations, to adapt to and mitigate  
38 519 climate change's impacts on health, it will also be important to unpack the 'what, how, and  
39 520 where' of these effects. Health effects of climate change are unlikely to be distributed equally or  
40 521 randomly through populations. It will be important to mitigate the changing climate's potential to  
41 522 exacerbate health inequities.

42  
43  
44  
45 523

46  
47  
48  
49 524

## 525 Acknowledgements

526 The authors gratefully acknowledge the contributions of Selma Chipenda Dansokho, as  
527 research associate, and Thierry Provencher, as research assistant, to this project, and of  
528 Frederic Bergeron, for assistance with search strategy, screening and selection of articles for  
529 the systematic review.

## 530 Funding

531 This study was funded by the Canadian Institutes of Health Research (CIHR) FDN-148426. The  
532 CIHR had no role in determining the study design, the plans for data collection or analysis, the  
533 decision to publish, nor the preparation of this manuscript. ACT is funded by a Tier 2 Canada  
534 Research Chair in Knowledge Synthesis. HOW is funded by a Tier 2 Canada Research Chair in  
535 Human-Centred Digital Health.

## 536 Authors' Contributions

537 RN, CF, ACT, HOW contributed to the design of the study. CB, RN, LPB, RAPR and HOW  
538 contributed to the systematic search of the literature and selection of studies. RR, HOW, LC  
539 conducted data analysis and interpretation. RR and HOW drafted the first version of the article  
540 with early revision by CB, LC and RN. All authors critically revised the article and approved the  
541 final version for submission for publication. RR and HOW had full access to all the data in the  
542 study and had final responsibility for the decision to submit for publication.

## 543 Conflict of Interest Statement

544 The authors have no conflict of interest to declare.

## 545 Data Sharing Statement

546 No additional data available.

## 547 Ethics Statement

548 Since this is a systematic review of previous systematic reviews, no ethics approval was  
549 required, as we did not collect original data.

550 **References**

- 551 1 Portier C, Tart K, Carter S, *et al.* A Human Health Perspective On Climate Change A  
552 Report Outlining the Research Needs on the Human Health Effects of Climate Change.  
553 Environmental Health Perspectives and the National Institute of Environmental Health  
554 Sciences , 2010.
- 555 2 Watts N, Amann M, Arnell N, *et al.* The 2020 report of The Lancet Countdown on health  
556 and climate change: responding to converging crises. *Lancet* 2021; **397**: 129–70.
- 557 3 Hsiang SM, Burke M. Climate, conflict, and social stability: what does the evidence say?  
558 *Clim Change* 2014; **123**: 39–55.
- 559 4 Hsiang SM, Burke M, Miguel E. Quantifying the Influence of Climate on Human Conflict.  
560 *Science* 2013; **341**. DOI:10.1126/science.1235367.
- 561 5 Patz JA, Frumkin H, Holloway T, Vimont DJ, Haines A. Climate change: challenges and  
562 opportunities for global health. *JAMA* 2014; **312**: 1565–80.
- 563 6 Alderman K, Turner LR, Tong SL. Floods and human health: A systematic review. *Environ*  
564 *Int* 2012; **47**: 37–47.
- 565 7 Coates SJ, Davis MDP, Andersen LK. Temperature and humidity affect the incidence of  
566 hand, foot, and mouth disease: a systematic review of the literature - a report from the  
567 International Society of Dermatology Climate Change Committee. *Int J Dermatol* 2019; **58**:  
568 388–99.
- 569 8 Duan C, Zhang X, Jin H, *et al.* Meteorological factors and its association with hand, foot  
570 and mouth disease in Southeast and East Asia areas: a meta-analysis. *Epidemiology &*  
571 *Infection* 2018; **147**: 1–18.
- 572 9 Babaie J, Barati M, Azizi M, Ephtekhari A, Sadat SJ. A systematic evidence review of the  
573 effect of climate change on malaria in Iran. *J Parasit Dis* 2018; **42**: 331–40.
- 574 10 Chua PL, Dorotan MM, Sigua JA, Estanislao RD, Hashizume M, Salazar MA. Scoping  
575 Review of Climate Change and Health Research in the Philippines: A Complementary Tool  
576 in Research Agenda-Setting. *Int J Environ Res Public Health* 2019; **16**.  
577 DOI:10.3390/ijerph16142624.
- 578 11 Lal A, Lill AW, McIntyre M, Hales S, Baker MG, French NP. Environmental change and  
579 enteric zoonoses in New Zealand: a systematic review of the evidence. *Aust N Z J Public*  
580 *Health* 2015; **39**: 63–8.
- 581 12 Li C, Lu Y, Liu J, Wu X. Climate change and dengue fever transmission in China:  
582 Evidences and challenges. *Sci Total Environ* 2018; **622-623**: 493–501.
- 583 13 Herlihy N, Bar-Hen A, Verner G, *et al.* Climate change and human health: what are the

- 1  
2  
3 584 research trends? A scoping review protocol. *BMJ Open* 2016; **6**: e012022.  
4  
5 585 14 Hosking J, Campbell-Lendrum D. How well does climate change and human health  
6 586 research match the demands of policymakers? A scoping review. *Environ Health Perspect*  
7 587 2012; **120**: 1076–82.  
8  
9  
10 588 15 Pollock M, Fernandes RM, Becker LA, Pieper D, Hartling L. Chapter V: Overviews of  
11 589 Reviews. In: Higgins JPT, Thomas J, Chandler J, Cumpston M, Li T, Page MJ, Welch VA,  
12 590 ed. *Cochrane Handbook for Systematic Reviews of Interventions* version 6.1 (updated  
13 591 September 2020). Cochrane, 2020.  
14  
15 592 16 Holly O, Witteman, Selma Chipenda Dansokho, Ruth Ndjaboue, Thierry Provencher, Rose-  
16 593 Alice Poulin-Rheault, Louann Poirier-Bergeron, Caroline Beaudoin, Catherine Fallon, Rhéa  
17 594 Rocque, Andrea Tricco. Climate change and human health: an overview of systematic  
18 595 reviews. 2019; published online Dec 4.  
19 596 [https://www.crd.york.ac.uk/PROSPERO/display\\_record.php?RecordID=145972](https://www.crd.york.ac.uk/PROSPERO/display_record.php?RecordID=145972) (accessed  
20 597 Aug 8, 2020).  
21  
22  
23 598 17 Page M, McKenzie J, Bossuyt P, *et al.* Updating the PRISMA reporting guideline for  
24 599 systematic reviews and meta-analyses. 2020. DOI:10.17605/OSF.IO/P93GE.  
25  
26 600 18 Pollock M, Fernandes RM, Pieper D, *et al.* Preferred Reporting Items for Overviews of  
27 601 Reviews (PRIOR): a protocol for development of a reporting guideline for overviews of  
28 602 reviews of healthcare interventions. *Syst Rev* 2019; **8**: 335.  
29  
30  
31 603 19 About Cochrane Reviews. <https://www.cochranelibrary.com/about/about-cochrane-reviews>  
32 604 (accessed Sept 14, 2020).  
33  
34 605 20 World Health Organization. Preamble to the Constitution of WHO as adopted by the  
35 606 International Health Conference. New York, 19 June - 22 July 1946 signed on 22 July 1946  
36 607 by the representatives of 61 States (Official Records of WHO, no. 2, p. 100) and entered  
37 608 into force on 7 April 1948. The definition has not been amended since 1948.  
38 609 [https://apps.who.int/gb/bd/pdf\\_files/BD\\_49th-en.pdf#page=7](https://apps.who.int/gb/bd/pdf_files/BD_49th-en.pdf#page=7).  
39  
40  
41 610 21 Covidence systematic review software. [www.covidence.org](http://www.covidence.org).  
42  
43 611 22 Watts N, Amann M, Arnell N, *et al.* The 2019 report of The Lancet Countdown on health  
44 612 and climate change: ensuring that the health of a child born today is not defined by a  
45 613 changing climate. *Lancet* 2019; **394**: 1836–78.  
46  
47 614 23 Boylan S, Beyer K, Schlosberg D, *et al.* A conceptual framework for climate change, health  
48 615 and wellbeing in NSW, Australia. *Public Health Res Pract* 2018; **28**.  
49 616 DOI:10.17061/phrp2841826.  
50  
51  
52 617 24 Amegah AK, Rezza G, Jaakkola JJ. Temperature-related morbidity and mortality in Sub-  
53 618 Saharan Africa: A systematic review of the empirical evidence. *Environ Int* 2016; **91**: 133–  
54 619 49.  
55  
56  
57  
58  
59  
60

- 1  
2  
3 620 25 Odame EA, Li Y, Zheng SM, Vaidyanathan A, Silver K. Assessing Heat-Related Mortality  
4 621 Risks among Rural Populations: A Systematic Review and Meta-Analysis of  
5 622 Epidemiological Evidence. *Int J Environ Res Public Health* 2018; **15**.  
6 623 DOI:10.3390/ijerph15081597.
- 8  
9 624 26 Leyva EWA, Beaman A, Davidson PM. Health Impact of Climate Change in Older People:  
10 625 An Integrative Review and Implications for Nursing. *J Nurs Scholarsh* 2017; **49**: 670–8.
- 12 626 27 Phalkey RK, Aranda-Jan C, Marx S, Hofle B, Sauerborn R. Systematic review of current  
13 627 efforts to quantify the impacts of climate change on undernutrition. *Proc Natl Acad Sci U S*  
14 628 *A* 2015; **112**: E4522–9.
- 16 629 28 Porpora MG, Piacenti I, Scaramuzzino S, Masciullo L, Rech F, Panici PB. Environmental  
17 630 contaminants exposure and preterm birth: A systematic review. *Toxics* 2019; **7**.  
18 631 DOI:10.3390/toxics7010011.
- 20 632 29 Bai L, Morton LC, Liu Q. Climate change and mosquito-borne diseases in China: a review.  
21 633 *Globalization & Health* 2013; **9**: 10–10.
- 23 634 30 Cheng J, Xu Z, Zhu R, *et al.* Impact of diurnal temperature range on human health: a  
24 635 systematic review. *Int J Biometeorol* 2014; **58**: 2011–24.
- 27 636 31 Phung D, Huang C, Rutherford S, Chu C, Wang X, Nguyen M. Climate Change, Water  
28 637 Quality, and Water-Related Diseases in the Mekong Delta Basin: A Systematic Review.  
29 638 *Asia Pac J Public Health* 2015; **27**: 265–76.
- 31 639 32 Klinger C, Landeg O, Murray V. Power Outages, Extreme Events and Health: A Systematic  
32 640 Review of the Literature from 2011-2012. *PLoS Curr* 2014.  
33 641 DOI:10.1371/currents.dis.04eb1dc5e73dd1377e05a10e9edde673.
- 35 642 33 Sun Z, Chen C, Xu D, Li T. Effects of ambient temperature on myocardial infarction: A  
36 643 systematic review and meta-analysis. *Environ Pollut* 2018; **241**: 1106–14.
- 38 644 34 Berhane K, Kumie A, Samet J. Health Effects of Environmental Exposures, Occupational  
39 645 Hazards and Climate Change in Ethiopia: Synthesis of Situational Analysis, Needs  
40 646 Assessment and the Way Forward. *Ethiopian Journal of Health Development* 2016; **30**: 50–  
41 647 6.
- 43 648 35 Bernhardt V, Finkelmeier F, Verhoff MA, Amendt J. Myiasis in humans-a global case  
44 649 report evaluation and literature analysis. *Parasitol Res* 2019; **118**: 389–97.
- 46 650 36 de Sousa TCM, Amancio F, Hacon SS, Barcellos C. [Climate-sensitive diseases in Brazil  
47 651 and the world: systematic review] Enfermedades sensibles al clima en Brasil y el mundo:  
48 652 revision sistematica. *Rev Panam Salud Publica* 2018; **42**: e85.
- 50 653 37 Dhimal M, Ahrens B, Kuch U. Climate Change and Spatiotemporal Distributions of Vector-  
51 654 Borne Diseases in Nepal--A Systematic Synthesis of Literature. *PLoS ONE [Electronic*  
52 655 *Resource]* 2015; **10**: e0129869.

- 1  
2  
3 656 38 Fan J, Wei W, Bai Z, *et al.* A systematic review and meta-analysis of dengue risk with  
4 657 temperature change. *Int J Environ Res Public Health* 2015; **12**: 1–15.
- 6 658 39 Gracia JR, Schumann B, Seidler A. Climate Variability and the Occurrence of Human  
7 659 Puumala Hantavirus Infections in Europe: A Systematic Review. *Zoonoses Public Health*  
8 660 2015; **62**: 465–78.
- 10  
11 661 40 Hedlund C, Blomstedt Y, Schumann B. Association of climatic factors with infectious  
12 662 diseases in the Arctic and subarctic region--a systematic review. *Glob Health Action* 2014;  
13 663 7: 24161.
- 15 664 41 Hii YL, Zaki RA, Aghamohammadi N, Rocklov J. Research on Climate and Dengue in  
16 665 Malaysia: A Systematic Review. *Current Environmental Health Reports* 2016; **3**: 81–90.
- 18 666 42 Khader YS, Abdelrahman M, Abdo N, *et al.* Climate change and health in the Eastern  
19 667 Mediterranean countries: a systematic review. *Rev Environ Health* 2015; **30**: 163–81.
- 22 668 43 Matysiak A, Roess A. Interrelationship between Climatic, Ecologic, Social, and Cultural  
23 669 Determinants Affecting Dengue Emergence and Transmission in Puerto Rico and Their  
24 670 Implications for Zika Response. *J Trop Med* 2017; **2017**. DOI:10.1155/2017/8947067.
- 26 671 44 Naish S, Dale P, Mackenzie JS, McBride J, Mengersen K, Tong S. Climate change and  
27 672 dengue: a critical and systematic review of quantitative modelling approaches. *BMC Infect*  
28 673 *Dis* 2014; **14**: 167–167.
- 31 674 45 Nichols A, Maynard V, Goodman B, Richardson J. Health, climate change and  
32 675 sustainability: a systematic review and thematic analysis of the literature. *Environ Health*  
33 676 *Insights* 2009; : 63–88.
- 35 677 46 Racloz V, Ramsey R, Tong S, Hu W. Surveillance of dengue fever virus: a review of  
36 678 epidemiological models and early warning systems. *PLoS Neglected Tropical Diseases*  
37 679 [*electronic resource*] 2012; **6**: e1648.
- 40 680 47 Swynghedauw B. [Medical consequences of global warming]. *Presse Med* 2009; **38**: 551–  
41 681 61.
- 43 682 48 Waits A, Emelyanova A, Oksanen A, Abass K, Rautio A. Human infectious diseases and  
44 683 the changing climate in the Arctic. *Environ Int* 2018; **121**: 703–13.
- 46 684 49 Xu Z, Etzel RA, Su H, Huang C, Guo Y, Tong S. Impact of ambient temperature on  
47 685 children's health: a systematic review. *Environ Res* 2012; **117**: 120–31.
- 49  
50 686 50 Yu W, Mengersen K, Dale P, *et al.* Projecting Future Transmission of Malaria Under  
51 687 Climate Change Scenarios: Challenges and Research Needs. *Crit Rev Environ Sci Technol*  
52 688 2015; **45**: 777–811.
- 54 689 51 Veenema TG, Thornton CP, Lavin RP, Bender AK, Seal S, Corley A. Climate Change-  
55 690 Related Water Disasters' Impact on Population Health. *J Nurs Scholarsh* 2017; **49**: 625–34.

- 1  
2  
3 691 52 Brown L, Murray V. Examining the relationship between infectious diseases and flooding  
4 692 in Europe: A systematic literature review and summary of possible public health  
5 693 interventions. *Disaster Health* 2013; **1**: 117–27.
- 6  
7  
8 694 53 Tall JA, Gatton ML, Tong S. Ross River Virus Disease Activity Associated With Naturally  
9 695 Occurring Nontidal Flood Events in Australia: A Systematic Review. *J Med Entomol* 2014;  
10 696 **51**: 1097–108.
- 11  
12 697 54 Ghazani M, FitzGerald G, Hu WB, Toloo G, Xu ZW. Temperature Variability and  
13 698 Gastrointestinal Infections: A Review of Impacts and Future Perspectives. *Int J Environ Res*  
14 699 *Public Health* 2018; **15**. DOI:10.3390/ijerph15040766.
- 15  
16 700 55 Gao J, Sun Y, Lu Y, Li L. Impact of ambient humidity on child health: a systematic review.  
17 701 *PLoS ONE [Electronic Resource]* 2014; **9**: e112508.
- 18  
19  
20 702 56 Lal A, Fearnley E, Wilford E. Local weather, flooding history and childhood diarrhoea  
21 703 caused by the parasite *Cryptosporidium* spp.: A systematic review and meta-analysis. *Sci*  
22 704 *Total Environ* 2019; **674**: 300–6.
- 23  
24 705 57 Levy K, Woster AP, Goldstein RS, Carlton EJ. Untangling the Impacts of Climate Change  
25 706 on Waterborne Diseases: a Systematic Review of Relationships between Diarrheal Diseases  
26 707 and Temperature, Rainfall, Flooding, and Drought. *Environ Sci Technol* 2016; **50**: 4905–22.
- 27  
28  
29 708 58 Philipsborn R, Ahmed SM, Brosi BJ, Levy K. Climatic Drivers of Diarrheagenic  
30 709 *Escherichia coli* Incidence: A Systematic Review and Meta-analysis. *J Infect Dis* 2016; **214**:  
31 710 6–15.
- 32  
33 711 59 Semenza JC, Herbst S, Rechenburg A, *et al.* Climate change impact assessment of food-  
34 712 and waterborne diseases. *Crit Rev Environ Sci Technol* 2012; **42**: 857–90.
- 35  
36 713 60 Stensgaard AS, Vounatsou P, Sengupta ME, Utzinger J. Schistosomes, snails and climate  
37 714 change: Current trends and future expectations. *Acta Trop* 2019; **190**: 257–68.
- 38  
39  
40 715 61 Welch K, Shipp-Hilts A, Eidson M, Saha S, Zansky S. Salmonella and the changing  
41 716 environment: systematic review using New York State as a model. *J Water Health* 2019;  
42 717 **17**: 179–95.
- 43  
44 718 62 Cann KF, Thomas DR, Salmon RL, Wyn-Jones AP, Kay D. Extreme water-related weather  
45 719 events and waterborne disease. *Epidemiology & Infection* 2013; **141**: 671–86.
- 46  
47  
48 720 63 Stanke C, Kerac M, Prudhomme C, Medlock J, Murray V. Health Effects of Drought: A  
49 721 Systematic Review of the Evidence. *PLoS Curr* 2013.  
50 722 DOI:10.1371/currents.dis.7a2cee9e980f91ad7697b570bcc4b004.
- 51  
52 723 64 Bunker A, Wildenhain J, Vandenberg A, *et al.* Effects of Air Temperature on Climate-  
53 724 Sensitive Mortality and Morbidity Outcomes in the Elderly; a Systematic Review and Meta-  
54 725 analysis of Epidemiological Evidence. *EBioMedicine* 2016; **6**: 258–68.



- 1  
2  
3 726 65 Campbell S, Remenyi TA, White CJ, Johnston FH. Heatwave and health impact research: A  
4 727 global review. *Health Place* 2018; **53**: 210–8.
- 6 728 66 Cunrui H, Barnett AG, Xiaoming W, Vaneckova P, FitzGerald G, Shilu T. Projecting  
7 729 Future Heat-Related Mortality under Climate Change Scenarios: A Systematic Review.  
8 730 *Environ Health Perspect* 2011; **119**: 1681–90.
- 11 731 67 Ghanizadeh G, Heidari M, Seifi B, Jafari H, Pakjoui S. The effect of climate change on  
12 732 cardiopulmonary disease—a systematic review. *J Clin Diagn Res* 2017; **11**: IE01–4.
- 14 733 68 Hajat S, Kosatky T. Heat-related mortality: a review and exploration of heterogeneity.  
15 734 *Journal of Epidemiology & Community Health* 2010; **64**: 753–60.
- 17 735 69 Lawton EM, Pearce H, Gabb GM. Review article: Environmental heatstroke and long-term  
18 736 clinical neurological outcomes: A literature review of case reports and case series 2000–  
19 737 2016. *Emerg Med Australas* 2019; **31**: 163–73.
- 22 738 70 Lian H, Ruan YP, Liang RJ, Liu XL, Fan ZJ. Short-Term Effect of Ambient Temperature  
23 739 and the Risk of Stroke: A Systematic Review and Meta-Analysis. *Int J Environ Res Public*  
24 740 *Health* 2015; **12**: 9068–88.
- 26 741 71 Moghadamnia MT, Ardalan A, Mesdaghinia A, Keshtkar A, Naddafi K, Yekaninejad MS.  
27 742 Ambient temperature and cardiovascular mortality: A systematic review and meta-analysis.  
28 743 *PeerJ* 2017; **2017**: 3574.
- 31 744 72 Salve HR, Parthasarathy R, Krishnan A, Pattanaik DR. Impact of ambient air temperature  
32 745 on human health in India. *Rev Environ Health* 2018; **33**: 433–9.
- 34 746 73 Sanderson M, Arbutnott K, Kovats S, Hajat S, Falloon P. The use of climate information  
35 747 to estimate future mortality from high ambient temperature: A systematic literature review.  
36 748 *PLoS ONE [Electronic Resource]* 2017; **12**: e0180369.
- 38 749 74 Witt C, Schubert AJ, Jehn M, *et al.* The Effects of Climate Change on Patients With  
39 750 Chronic Lung Disease. A Systematic Literature Review. *Dtsch Arztebl Int* 2015; **112**: 878–  
40 751 83.
- 43 752 75 Xu Z, Sheffield PE, Su H, Wang X, Bi Y, Tong S. The impact of heat waves on children’s  
44 753 health: a systematic review. *Int J Biometeorol* 2014; **58**: 239–47.
- 46 754 76 Xu Z, FitzGerald G, Guo Y, Jalaludin B, Tong S. Impact of heatwave on mortality under  
47 755 different heatwave definitions: A systematic review and meta-analysis. *Environ Int* 2016;  
48 756 **89-90**: 193–203.
- 51 757 77 Yu W, Mengersen K, Wang X, *et al.* Daily average temperature and mortality among the  
52 758 elderly: a meta-analysis and systematic review of epidemiological evidence. *Int J*  
53 759 *Biometeorol* 2012; **56**: 569–81.
- 55 760 78 Doocy S, Dick A, Daniels A, Kirsch TD. The Human Impact of Tropical Cyclones: A

- 1  
2  
3 761 Historical Review of Events 1980-2009 and Systematic Literature Review. *PLoS Curr*  
4 762 2013. DOI:10.1371/currents.dis.2664354a5571512063ed29d25ffbce74.
- 5  
6 763 79 Madaniyazi L, Guo Y, Yu W, Tong S. Projecting future air pollution-related mortality  
7 764 under a changing climate: Progress, uncertainties and research needs. *Environ Int* 2015; **75**:  
8 765 21–32.
- 9  
10  
11 766 80 Liu JC, Pereira G, Uhl SA, Bravo MA, Bell ML. A systematic review of the physical health  
12 767 impacts from non-occupational exposure to wildfire smoke. *Environ Res* 2015; **136**: 120–  
13 768 32.
- 14  
15 769 81 Reid CE, Brauer M, Johnston FH, Jerrett M, Balme JR, Elliott CT. Critical Review of  
16 770 Health Impacts of Wildfire Smoke Exposure. *Environ Health Perspect* 2016; **124**: 1334–43.
- 17  
18 771 82 Youssouf H, Liousse C, Roblou L, *et al.* Non-accidental health impacts of wildfire smoke.  
19 772 *International Journal of Environmental Research & Public Health [Electronic Resource]*  
20 773 2014; **11**: 11772–804.
- 21  
22  
23 774 83 Lake IR, Jones NR, Agnew M, *et al.* Climate Change and Future Pollen Allergy in Europe.  
24 775 *Environ Health Perspect* 2017; **125**: 385–91.
- 25  
26 776 84 Cong XW, Xu XJ, Zhang YL, Wang QH, Xu L, Huo X. Temperature drop and the risk of  
27 777 asthma: a systematic review and meta-analysis. *Environ Sci Pollut Res* 2017; **24**: 22535–46.
- 28  
29 778 85 Zuo J, Pullen S, Palmer J, Bennetts H, Chileshe N, Ma T. Impacts of heat waves and  
30 779 corresponding measures: a review. *J Clean Prod* 2015; **92**: 1–12.
- 31  
32  
33 780 86 Xu Z, Crooks JL, Davies JM, Khan AF, Hu W, Tong S. The association between ambient  
34 781 temperature and childhood asthma: a systematic review. *Int J Biometeorol* 2018; **62**: 471–  
35 782 81.
- 36  
37 783 87 Sawatzky A, Cunsolo A, Jones-Bitton A, Middleton J, Harper SL. Responding to Climate  
38 784 and Environmental Change Impacts on Human Health via Integrated Surveillance in the  
39 785 Circumpolar North: A Systematic Realist Review. *International Journal of Environmental*  
40 786 *Research & Public Health [Electronic Resource]* 2018; **15**: 30.
- 41  
42  
43 787 88 Wald A. Emergency Department Visits and Costs for Heat-Related Illness Due to Extreme  
44 788 Heat or Heat Waves in the United States: An Integrated Review. *Nurs Econ* 2019; **37**: 35–  
45 789 48.
- 46  
47 790 89 Gao JJ, Cheng Q, Duan J, *et al.* Ambient temperature, sunlight duration, and suicide: A  
48 791 systematic review and meta-analysis. *Sci Total Environ* 2019; **646**: 1021–9.
- 49  
50  
51 792 90 Benevolenza MA, DeRigne L. The impact of climate change and natural disasters on  
52 793 vulnerable populations: A systematic review of literature. *J Hum Behav Soc Environ* 2019;  
53 794 **29**: 266–81.
- 54  
55 795 91 Rataj E, Kunzweiler K, Garthus-Niegel S. Extreme weather events in developing countries

- 1  
2  
3 796 and related injuries and mental health disorders - a systematic review. *BMC Public Health*  
4 797 2016; **16**: 1020–1020.
- 5  
6 798 92 Fernandez A, Black J, Jones M, *et al.* Flooding and Mental Health: A Systematic Mapping  
7 799 Review. *PLoS ONE [Electronic Resource]* 2015; **10**. DOI:10.1371/journal.pone.0119929.
- 8  
9  
10 800 93 Vins H, Bell J, Saha S, Hess JJ. The Mental Health Outcomes of Drought: A Systematic  
11 801 Review and Causal Process Diagram. *International Journal of Environmental Research &*  
12 802 *Public Health [Electronic Resource]* 2015; **12**: 13251–75.
- 13  
14 803 94 Carolan-Olah M, Frankowska D. High environmental temperature and preterm birth: A  
15 804 review of the evidence. *Midwifery* 2014; **30**: 50–9.
- 16  
17 805 95 Kuehn L, McCormick S. Heat Exposure and Maternal Health in the Face of Climate  
18 806 Change. *International Journal of Environmental Research & Public Health [Electronic*  
19 807 *Resource]* 2017; **14**: 29.
- 20  
21  
22 808 96 Poursafa P, Keikha M, Kelishadi R. Systematic review on adverse birth outcomes of climate  
23 809 change. *J Res Med Sci* 2015; **20**: 397–402.
- 24  
25 810 97 Zhang YQ, Yu CH, Wang L. Temperature exposure during pregnancy and birth outcomes:  
26 811 An updated systematic review of epidemiological evidence. *Environ Pollut* 2017; **225**: 700–  
27 812 12.
- 28  
29  
30 813 98 An R, Ji M, Zhang S. Global warming and obesity: a systematic review. *Obes Rev* 2018; **19**:  
31 814 150–63.
- 32  
33 815 99 Vilcins D, Sly PD, Jagals P. Environmental Risk Factors Associated with Child Stunting: A  
34 816 Systematic Review of the Literature. *Annals of Global Health* 2018; **84**: 551–62.
- 35  
36 817 100 Huang KC, Weng HH, Yang TY, Chang TS, Huang TW, Lee MS. Distribution of Fatal  
37 818 *Vibrio Vulnificus* Necrotizing Skin and Soft-Tissue Infections: A Systematic Review and  
38 819 Meta-Analysis. *Medicine* 2016; **95**: e2627.
- 40  
41 820 101 Augustin J, Franzke N, Augustin M, Kappas M. Does climate change affect the incidence of  
42 821 skin and allergic diseases in Germany? *J Dtsch Dermatol Ges* 2008; **6**: 632–8.
- 43  
44 822 102 Binazzi A, Levi M, Bonafede M, *et al.* Evaluation of the impact of heat stress on the  
45 823 occurrence of occupational injuries: Meta-analysis of observational studies. *Am J Ind Med*  
46 824 2019; **62**: 233–43.
- 47  
48 825 103 Bonafede M, Marinaccio A, Asta F, Schifano P, Michelozzi P, Vecchi S. The association  
49 826 between extreme weather conditions and work-related injuries and diseases. A systematic  
50 827 review of epidemiological studies. *Annali Dell Istituto Superiore Di Sanita* 2016; **52**: 357–  
51 828 67.
- 52  
53  
54 829 104 Flouris AD, Dinas PC, Ioannou LG, *et al.* Workers' health and productivity under  
55 830 occupational heat strain: a systematic review and meta-analysis. *The lancet Planetary*

- 1  
2  
3 831 *Health* 2018; **2**: e521–31.  
4  
5 832 105 Levi M, Kjellstrom T, Baldasseroni A. Impact of climate change on occupational health and  
6 833 productivity: a systematic literature review focusing on workplace heat. *Medicina del*  
7 834 *Lavoro* 2018; **109**: 163–79.
- 8  
9  
10 835 106 Varghese BM, Hansen A, Bi P, Pisaniello D. Are workers at risk of occupational injuries  
11 836 due to heat exposure? A comprehensive literature review. *Saf Sci* 2018; **110**: 380–92.
- 12  
13 837 107 Wimalawansa SA, Wimalawansa SJ. Environmentally induced, occupational diseases with  
14 838 emphasis on chronic kidney disease of multifactorial origin affecting tropical countries.  
15 839 *Annals of Occupational and Environmental Medicine* 2016; **28**. DOI:10.1186/s40557-016-  
16 840 0119-y.
- 17  
18 841 108 Zhang Y, Bi P, Hiller JE. Climate change and disability -- adjusted life years. *J Environ*  
19 842 *Health* 2007; **70**: 32–6.
- 20  
21  
22 843 109 Park KY, Kim HJ, Ahn HS, Yim SY, Jun JB. Association between acute gouty arthritis and  
23 844 meteorological factors: An ecological study using a systematic review and meta-analysis.  
24 845 *Semin Arthritis Rheum* 2017; **47**: 369–75.
- 25  
26 846 110 Kampe EOI, Kovats S, Hajat S. Impact of high ambient temperature on unintentional  
27 847 injuries in high-income countries: a narrative systematic literature review. *BMJ Open* 2016;  
28 848 **6**. DOI:10.1136/bmjopen-2015-010399.
- 29  
30  
31 849 111 Rifkin DI, Long MW, Perry MJ. Climate change and sleep: A systematic review of the  
32 850 literature and conceptual framework. *Sleep Med Rev* 2018; **42**: 3–9.
- 33  
34 851 112 Clayton S. Climate anxiety: Psychological responses to climate change. *J Anxiety Disord*  
35 852 2020; **74**: 102263.
- 36  
37 853 113 Davenport L. Emotional Resiliency in the Era of Climate Change: A Clinician’s Guide.  
38 854 London: Jessica Kingsley Publishers, 2017.
- 39  
40  
41 855 114 Maibach EW, Nisbet M, Baldwin P, Akerlof K, Diao G. Reframing climate change as a  
42 856 public health issue: an exploratory study of public reactions. *BMC Public Health* 2010; **10**:  
43 857 299.
- 44  
45 858 115 Stoknes PE. What we think about when we try not to think about global warming: Toward a  
46 859 new psychology of climate action. *White River Junction, Vermont: Chelsea Green*  
47 860 *Publishing* 2015.
- 48  
49  
50 861 116 Ahmadi S, Schütte S, Herlihy N, Hemono M, Flahault A, Depoux A. Health as a Key  
51 862 Driver of Climate Change Communication. A Scoping Review. *Preprints* 2020;  
52 863 **2020100095**. DOI:10.20944/preprints202010.0095.v1.
- 53  
54 864 117 Adlong W, Dietsch E. Environmental education and the health professions: framing climate  
55 865 change as a health issue. *Environ Educ Res* 2015; **21**: 687–709.
- 56  
57  
58  
59  
60

- 1  
2  
3 866 118 Myers TA, Nisbet MC, Maibach EW, Leiserowitz AA. A public health frame arouses  
4 867 hopeful emotions about climate change. *Clim Change* 2012; **113**: 1105–12.  
5  
6 868 119 Costello A, Montgomery H, Watts N. Climate change: the challenge for healthcare  
7 869 professionals. *BMJ* 2013; **347**: f6060.  
8  
9  
10 870 120 Gould S, Rudolph L. Challenges and Opportunities for Advancing Work on Climate  
11 871 Change and Public Health. *Int J Environ Res Public Health* 2015; **12**: 15649–72.  
12  
13 872 121 Yang L, Liu C, Hess J, Phung D, Huang C. Health professionals in a changing climate:  
14 873 protocol for a scoping review. *BMJ Open* 2019; **9**: e024451.  
15

16 874

17  
18 875  
19  
20  
21  
22  
23  
24  
25  
26  
27  
28  
29  
30  
31  
32  
33  
34  
35  
36  
37  
38  
39  
40  
41  
42  
43  
44  
45  
46  
47  
48  
49  
50  
51  
52  
53  
54  
55  
56  
57  
58  
59  
60

## 876 Figure Legends

877

878 **Figure 1. The flow chart for included articles in this review.**

879

880 **Figure 2. Number of included systematic reviews by year of publication.**

881

882 **Figure 3. Number of publications according to geographic affiliation of the first author.**

883

884 **Figure 4. Summary of the combination of climate impact and health outcome**

885 **(frequencies).** *Note:* The total frequency for one category of health outcome could exceed the  
886 number of publications included in this health outcome, since one publication could explore the  
887 health impact according to more than one climate factor (e.g., one publication could explore  
888 both the impact of extreme weather events and temperature on mental health.

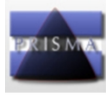

### PRISMA 2009 Flow Diagram



Figure 1. The flow chart for included articles in this review.

165x174mm (600 x 600 DPI)

1  
2  
3  
4  
5  
6  
7  
8  
9  
10  
11  
12  
13  
14  
15  
16  
17  
18  
19  
20  
21  
22  
23  
24  
25  
26  
27  
28  
29  
30  
31  
32  
33  
34  
35  
36  
37  
38  
39  
40  
41  
42  
43  
44  
45  
46  
47  
48  
49  
50  
51  
52  
53  
54  
55  
56  
57  
58  
59  
60

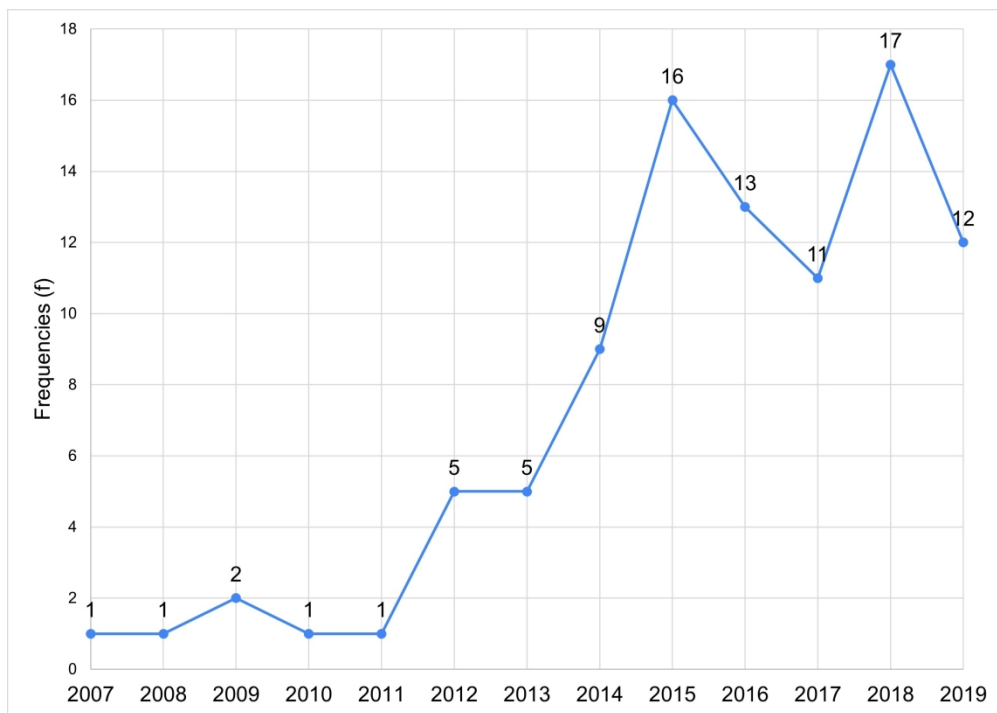

Figure 2. Number of included systematic reviews by year of publication.

199x141mm (330 x 330 DPI)



1  
2  
3  
4  
5  
6  
7  
8  
9  
10  
11  
12  
13  
14  
15  
16  
17  
18  
19  
20  
21  
22  
23  
24  
25  
26  
27  
28  
29  
30  
31  
32  
33  
34  
35  
36  
37  
38  
39  
40  
41  
42  
43  
44  
45  
46  
47  
48  
49  
50  
51  
52  
53  
54  
55  
56  
57  
58  
59  
60

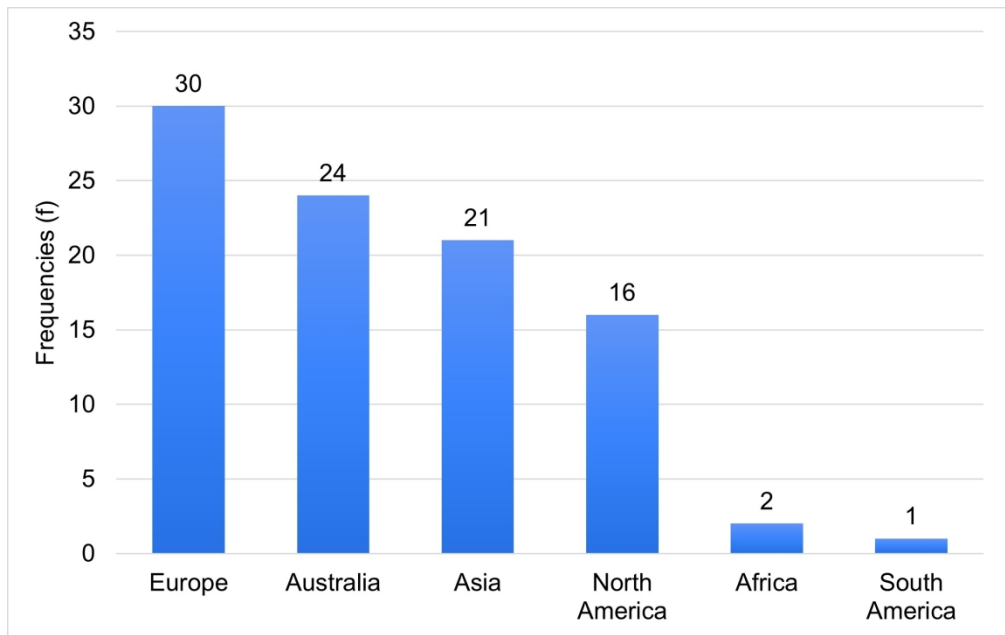

Figure 3. Number of publications according to geographic affiliation of the first author.

172x108mm (330 x 330 DPI)



For peer review only - <http://bmjopen.bmj.com/site/about/guidelines.xhtml>

■ Meteorological ■ Extreme Weather ■ Air quality ■ General ■ Other

## Appendix 1. Search Strategy

Database: **MEDLINE (OVID)**

No database limit

| Concepts                                     | #  | Search strategy                                                 |
|----------------------------------------------|----|-----------------------------------------------------------------|
| Global Warming                               | 1  | exp Climate Change/                                             |
|                                              | 2  | "Global warming".ti,ab,kw                                       |
|                                              | 3  | "Climate Change?".ti,ab,kw                                      |
| Global Warming combined                      | 4  | or/1-3                                                          |
| Systematic review and meta-analysis          | 5  | exp Meta-Analysis as Topic/                                     |
|                                              | 6  | "Meta-Analysis"/                                                |
|                                              | 7  | Meta-Analysis.ti,ab,kw                                          |
|                                              | 8  | "meta analy*".ti,ab,kw                                          |
|                                              | 9  | metaanaly*.ti,ab,kw                                             |
|                                              | 10 | "Systematic Review"/                                            |
|                                              | 11 | "Systematic Reviews as Topic"/                                  |
|                                              | 12 | (systematic adj2 review).ti,ab,kw                               |
|                                              | 13 | (review adj1 ("selection criteria" OR "data extraction")).ti,ab |
| Systematic review and meta-analysis combined | 14 | or/5-13                                                         |
| Combination of concepts                      | 15 | 4 AND 14                                                        |

Database: **Embase.com**

No database limit

| Concepts                                     | #  | Search strategy                                                   |
|----------------------------------------------|----|-------------------------------------------------------------------|
| Global Warming                               | 1  | 'climate change'/de                                               |
|                                              | 2  | 'greenhouse effect'/de                                            |
|                                              | 3  | "Global warming":ti,ab,kw                                         |
|                                              | 4  | "Climate Change*":ti,ab,kw                                        |
| Global Warming combined                      | 5  | #1 OR #2 OR #3 OR #4                                              |
| Systematic review and meta-analysis          | 6  | 'meta analysis'/exp                                               |
|                                              | 7  | 'meta analysis (topic)'/de                                        |
|                                              | 8  | Meta-Analysis:ti,ab,kw                                            |
|                                              | 9  | "meta analy*":ti,ab,kw                                            |
|                                              | 10 | metaanaly*:ti,ab,kw                                               |
|                                              | 11 | 'systematic review'/de                                            |
|                                              | 12 | (systematic NEAR/2 review):ti,ab,kw                               |
|                                              | 13 | (review NEAR/2 ("selection criteria" OR "data extraction")):ti,ab |
| Systematic review and meta-analysis combined | 14 | #7 OR #8 OR #9 OR #10 OR #11 OR #12 OR #13 OR #14                 |

|                         |    |                                                       |
|-------------------------|----|-------------------------------------------------------|
| Combination of concepts | 15 | #14 AND #5                                            |
| Embase database only    | 16 | AND [embase]/lim NOT ([embase]/lim AND [medline]/lim) |

Database: **Web of Science**

Limit to: Science Citation Index Expanded (SCI-EXPANDED) and Emerging Sources Citation Index (ESCI) index only

| Concepts                                     | # | Search strategy                                                |
|----------------------------------------------|---|----------------------------------------------------------------|
| Global Warming                               | 1 | TS=("Global warming" OR "Climate Change\$")                    |
| Systematic review and meta-analysis          | 2 | TS=(Meta-Analysis)                                             |
|                                              | 3 | TS=("meta analy*")                                             |
|                                              | 4 | TS=(metaanaly*)                                                |
|                                              | 5 | TS=(systematic NEAR/2 review)                                  |
|                                              | 6 | TS=(review NEAR/1 ("selection criteria" OR "data extraction")) |
| Systematic review and meta-analysis combined | 7 | #6 OR #5 OR #4 OR #3 OR #2                                     |
| Combination of concepts                      | 8 | #7 AND #1                                                      |

Database: **CINAHL**

No database limit

| Concepts       | # | Search strategy     |
|----------------|---|---------------------|
| Global Warming | 1 | MH "Climate Change" |

|                                     |    |                                                            |
|-------------------------------------|----|------------------------------------------------------------|
|                                     | 2  | MH "Greenhouse Effect"                                     |
|                                     | 3  | TI "Global warming"                                        |
|                                     | 4  | TI "Climate Change?"                                       |
|                                     | 5  | AB "Global warming"                                        |
|                                     | 6  | AB "Climate Change?"                                       |
| Global Warming combined             | 7  | S1 OR S2 OR S3 OR S4 OR S5 OR S6                           |
| Systematic review and meta-analysis | 8  | MH "Meta Analysis"                                         |
|                                     | 9  | TI "Meta-Analysis"                                         |
|                                     | 10 | AB "Meta-Analysis"                                         |
|                                     | 11 | TI "meta analy**"                                          |
|                                     | 12 | AB "meta analy**"                                          |
|                                     | 13 | TI metaanaly*                                              |
|                                     | 14 | AB metaanaly*                                              |
|                                     | 15 | MH "Systematic Review"                                     |
|                                     | 16 | TI (systematic N2 review)                                  |
|                                     | 17 | AB (systematic N2 review)                                  |
|                                     | 18 | TI (review N1 ("selection criteria" OR "data extraction")) |
|                                     | 19 | AB (review N1 ("selection criteria" OR "data extraction")) |

1  
2  
3  
4  
5  
6  
7  
8  
9  
10  
11  
12  
13  
14  
15  
16  
17  
18  
19  
20  
21  
22  
23  
24  
25  
26  
27  
28  
29  
30  
31  
32  
33  
34  
35  
36  
37  
38  
39  
40  
41  
42  
43  
44  
45  
46  
47  
48  
49  
50  
51  
52  
53  
54  
55  
56  
57  
58  
59  
60

|                                              |    |                                                                                |
|----------------------------------------------|----|--------------------------------------------------------------------------------|
| Systematic review and meta-analysis combined | 20 | S8 OR S9 OR S10 OR S11 OR S12 OR S13 OR S14 OR S15 OR S16 OR S17 OR S18 OR S19 |
| Combination of concepts                      | 21 | S7 AND S20                                                                     |

For peer review only

**Appendix 2.** Summary of AMSTAR-2 items and modified AMSTAR-2 items.

| Topic # | AMSTAR-2 Original Items                                                                                                                                                                                                                                                                 | AMSTAR-2 Modifications                                                                                                                                                                                                                                                                                 |
|---------|-----------------------------------------------------------------------------------------------------------------------------------------------------------------------------------------------------------------------------------------------------------------------------------------|--------------------------------------------------------------------------------------------------------------------------------------------------------------------------------------------------------------------------------------------------------------------------------------------------------|
| 1       | <p>Did the research questions and inclusion criteria for the review include components of PICO?</p> <ul style="list-style-type: none"> <li>- Population</li> <li>- Intervention</li> <li>- Comparator group</li> <li>- Outcome</li> <li>- Timeframe for follow-up (optional)</li> </ul> | <p>“Population” became “Population and/or location”.</p> <p>“Intervention” became “Exposure”.</p> <p>The “Comparator group” category was taken out.</p> <p>A new section (#1.b)) was created, it includes “Definition of the exposure”, “Definition of the outcome” and “Timeframe for follow up”.</p> |
| 2       | <p>Did the report of the review contain an explicit statement that the review methods were established prior to the conduct of the review and did the report justify any significant deviations from the protocol?</p>                                                                  | <p>To score “yes”, a protocol must have been established before the review. There are no sub-criteria, you can only score yes or no.</p>                                                                                                                                                               |
| 3       | <p>Did the review authors explain their selection of the study designs for inclusion in the review?</p>                                                                                                                                                                                 | <p>If the study designs are specified, you score “partial yes”. They must be explained to score “yes”. No specific study design is required.</p>                                                                                                                                                       |
| 4       | <p>Did the review authors use a comprehensive literature search strategy?</p>                                                                                                                                                                                                           | <p>The “searched trial/study registries” category was taken out.</p> <p>Justified publication restrictions (e.g. language) moved from (partial yes) to (yes)</p>                                                                                                                                       |
| 5       | <p>Did the review authors perform study selection in duplicate?</p>                                                                                                                                                                                                                     | <p>No modifications.</p>                                                                                                                                                                                                                                                                               |
| 6       | <p>Did the review authors perform data extraction in duplicate?</p>                                                                                                                                                                                                                     | <p>No modifications.</p>                                                                                                                                                                                                                                                                               |
| 7       | <p>Did the review authors provide a list of excluded studies and justify the exclusion?</p>                                                                                                                                                                                             | <p>The explanation of the inclusion and exclusion criteria is evaluated.</p> <p>If there is only one out of the two, you score “partial yes”. The two must be explained to score “yes”.</p>                                                                                                            |
| 8       | <p>Did the review authors describe the included studies in adequate detail?</p>                                                                                                                                                                                                         | <p>“Populations” became “Populations and/or locations”.</p> <p>“Interventions” became “Exposures”.</p> <p>“Comparator groups” became “Comparator groups (if applicable)”.</p> <p>“Populations and/or locations”, “Exposures” and “Outcomes” must be described in details to score “yes”</p>            |
| 9       | <p>Did the review authors use a satisfactory technique for assessing the risk of bias (RoB) in individual studies that were included in the review?</p>                                                                                                                                 | <p>“RoB” became “limitations”. Instead of assessing the RoB, the review authors must have used a satisfactory technique for assessing the limitations in individual studies that were included in the review.</p>                                                                                      |



|    |                                                                                                                                                                                                        |                                                                                                                                                                                                  |
|----|--------------------------------------------------------------------------------------------------------------------------------------------------------------------------------------------------------|--------------------------------------------------------------------------------------------------------------------------------------------------------------------------------------------------|
| 10 | Did the review authors report on the sources of funding for the studies included in the review?                                                                                                        | No modifications.                                                                                                                                                                                |
| 11 | If meta-analysis was performed did the review authors use appropriate methods for statistical combination of results?                                                                                  | No modifications.                                                                                                                                                                                |
| 12 | If meta-analysis was performed, did the review authors assess the potential impact of RoBin individual studies on the results of the meta-analysis or other evidence synthesis                         | No modifications.                                                                                                                                                                                |
| 13 | Did the review authors account for RoB in individual studies when interpreting/discussing the results of the review?                                                                                   | “RoB” became “limitations”. Instead of accounting for RoB in individual studies, the review authors must have accounted for limitations when interpreting/ discussing the results of the review. |
| 14 | Did the review authors provide a satisfactory explanation for, and discussion of, any heterogeneity observed in the results of the review?                                                             | No modifications.                                                                                                                                                                                |
| 15 | If they performed quantitative synthesis did the review authors carry out an adequate investigation of publication bias (small study bias) and discuss its likely impact on the results of the review? | No modifications.                                                                                                                                                                                |
| 16 | Did the review authors report any potential sources of conflict of interest, including any funding they received for conducting the review?                                                            | No modifications.                                                                                                                                                                                |

**Appendix 3.** Overview of included studies (N=94) according to study characteristics and summary of climate impacts on health outcomes. Studies are presented in alphabetical order according to the first author's last name.

|   | First Author | Year | Country       | Years of included publications | Years of the studies included in the reviews | # of articles | Meta-analysis | Specific Area of focus | Specific Population of interest | Climate Impact  | Health Outcome                                                                                                                                             | Summary of findings                                                                                                                                                                                                                                                     |
|---|--------------|------|---------------|--------------------------------|----------------------------------------------|---------------|---------------|------------------------|---------------------------------|-----------------|------------------------------------------------------------------------------------------------------------------------------------------------------------|-------------------------------------------------------------------------------------------------------------------------------------------------------------------------------------------------------------------------------------------------------------------------|
| 1 | Alderman     | 2012 | Australia     | 2004-2011                      | 1931-2007                                    | 35            | No            |                        |                                 | Extreme weather | Infectious diseases<br>Mortality<br>Health systems<br>Mental health<br>Pregnancy and birth<br>Other                                                        | Floods are associated with infectious diseases (water- and vector-borne diseases), mortality (e.g., drowning), exacerbation of chronic illnesses, mental health issues (e.g., PTSD), hospital admissions, pregnancy outcomes and injuries.                              |
| 2 | Amegah       | 2016 | Ghana         | 1995-2014                      | 1960-2010                                    | 23            | No            | Sub-saharan Africa     |                                 | Meteorological  | Infectious diseases<br>Mortality<br>Respiratory, cardiovascular, and neurological outcomes<br>Health systems<br>Nutritional<br>Skin diseases and allergies | Temperature and temperature variability are suggested to be associated with infectious diseases, such as Ebola, cardiovascular diseases, mortality, cholera outbreaks, meningitis, undernutrition in children, respiratory outcomes, such as asthma, and skin diseases. |
| 3 | An           | 2018 | United States | 2002-2017                      | 2002-2016                                    | 50            | No            |                        |                                 | General         | Nutritional                                                                                                                                                | Climate change is associated with obesity. This association can be explained in 4 ways, such that climate change may impact obesity, obesity may impact climate change, both factors may be associated with common causes, or both factors may influence each other.    |

|    |             |      |               |           |           |     |     |          |                        |                                   |                                               |                                                                                                                                                                                                                       |
|----|-------------|------|---------------|-----------|-----------|-----|-----|----------|------------------------|-----------------------------------|-----------------------------------------------|-----------------------------------------------------------------------------------------------------------------------------------------------------------------------------------------------------------------------|
| 4  | Augustin    | 2008 | Germany       | 1996-2006 | NS        | 320 | No  | Germany  |                        | Meteorological                    | Skin diseases and allergies                   | Although skin and allergic diseases are climate sensitive, there is not sufficient evidence to suggest a prediction concerning skin and allergic diseases linked to climate change in Germany.                        |
| 5  | Babaie      | 2018 | Iran          | 2007-2017 | 1970-2015 | 14  | No  | Iran     |                        | Meteorological                    | Infectious diseases                           | Temperature, precipitation and humidity are associated with the risk of transmission of Malaria.                                                                                                                      |
| 6  | Bai         | 2013 | China         | 1995-2011 | 1951-2010 | 57  | No  | China    |                        | Meteorological                    | Infectious diseases                           | Variability in temperature, precipitation and wind are associated with the risk of transmission of mosquito-borne diseases.                                                                                           |
| 7  | Benevolenza | 2019 | United States | 2006-2017 | 2005-2015 | 13  | No  |          | Vulnerable populations | Extreme weather                   | Mental health<br>Pregnancy and birth<br>Other | Extreme weather events are associated with an exacerbation of pre-existing chronic health conditions, mental health issues (e.g., PTSD, isolation) and adverse birth outcomes.                                        |
| 8  | Berhane     | 2016 | Ethiopia      | NS        | NS        | 23  | No  | Ethiopia |                        | Meteorological<br>Extreme weather | Infectious diseases<br>Nutritional            | Meteorological factors and extreme weather events are associated with under- and mal- nutrition and the increased risk of climate sensitive infectious diseases (e.g., malaria, diarrhea, zoonotic infections, etc.). |
| 9  | Bernhardt   | 2019 | Germany       | 1997-2017 | NS        | 464 | No  |          |                        | Meteorological                    | Infectious diseases                           | Rising temperatures are predicted to be associated with myiasis in the future.                                                                                                                                        |
| 10 | Binazzi     | 2019 | Italy         | NS        | 1994-2013 | 8   | Yes |          | Workers                | Meteorological                    | Occupational health and injuries              | High temperatures are positively associated with occupational injuries.                                                                                                                                               |
| 11 | Bonafede    | 2016 | Italy         | 2000-2014 | 1985-2010 | 8   | No  |          | Workers                | Meteorological                    | Occupational health and injuries              | Extreme temperature (particularly heat) is associated with occupational injuries.                                                                                                                                     |

|    |              |      |                |           |           |     |     |        |                           |                 |                                                                                                                       |                                                                                                                                                                                                                |
|----|--------------|------|----------------|-----------|-----------|-----|-----|--------|---------------------------|-----------------|-----------------------------------------------------------------------------------------------------------------------|----------------------------------------------------------------------------------------------------------------------------------------------------------------------------------------------------------------|
| 12 | Brown        | 2013 | United Kingdom | 2004-2012 | 1975-2012 | 38  | No  | Europe |                           | Extreme weather | Infectious diseases                                                                                                   | Floods are associated with infectious diseases, including water-, rodent- and vector-borne diseases (from weeks to months after flooding).                                                                     |
| 13 | Bunker       | 2016 | Germany        | 1995-2015 | 1974-2013 | 61  | Yes |        | Elderly                   | Meteorological  | Mortality<br>Respiratory, cardiovascular, and neurological outcomes<br>Other                                          | Higher and lower temperatures are associated with cardiovascular and respiratory morbidity and mortality. Heat is also associated with diabetes and genitourinary infections.                                  |
| 14 | Campbell     | 2018 | Australia      | 1964-2017 | NS        | 188 | No  |        |                           | Meteorological  | Mortality<br>Health systems                                                                                           | Most studies exploring the heat impacts on health focus on mortality outcomes, followed by hospital admissions and ambulance call outs.                                                                        |
| 15 | Cann         | 2013 | United Kingdom | 1973-2010 | NS        | 83  | No  |        |                           | Extreme weather | Infectious diseases                                                                                                   | Extreme water-related events are associated with outbreaks of water-related infectious diseases.                                                                                                               |
| 16 | Carolan-Olah | 2014 | Australia      | 1997-2012 | 1988-2009 | 7   | No  |        |                           | Meteorological  | Pregnancy and birth                                                                                                   | High temperatures are associated with preterm birth.                                                                                                                                                           |
| 17 | Cheng        | 2014 | China          | 1990-2013 | 1941-2012 | 25  | No  |        | Adults, Elderly, Children | Meteorological  | Infectious diseases<br>Mortality<br>Respiratory, cardiovascular, and neurological outcomes<br>Health systems<br>Other | Diurnal temperature range is associated with mortality and cardiovascular and respiratory outcomes, hospital admissions, and Hand Foot Mouth disease in children and genitourinary outcomes among the elderly. |
| 18 | Coates       | 2019 | Denmark        | 2003-2018 | NS        | 72  | No  |        |                           | Meteorological  | Infectious diseases                                                                                                   | Some meteorological factors (temperature, humidity) are positively associated with Hand Foot Mouth disease (HFMD). Precipitation, wind speed and sunshine are not associated with HFMD.                        |

|    |           |      |               |           |           |     |     |                         |  |                 |                                                                               |                                                                                                                                                                                                                                                                    |
|----|-----------|------|---------------|-----------|-----------|-----|-----|-------------------------|--|-----------------|-------------------------------------------------------------------------------|--------------------------------------------------------------------------------------------------------------------------------------------------------------------------------------------------------------------------------------------------------------------|
| 19 | Cong      | 2017 | China         | 1994-2015 | 1982-2013 | 26  | Yes |                         |  | Meteorological  | Respiratory, cardiovascular, and neurological outcomes                        | Temperature drop is associated with asthma.                                                                                                                                                                                                                        |
| 20 | Cunrui    | 2011 | Australia     | 1997-2010 | 1961-2100 | 14  | No  |                         |  | Meteorological  | Mortality                                                                     | Higher temperature is associated with heat-related mortality.                                                                                                                                                                                                      |
| 21 | deSousa   | 2018 | Brazil        | 1976-2016 | NS        | 106 | No  |                         |  | Meteorological  | Infectious diseases<br>Respiratory, cardiovascular, and neurological outcomes | Meteorological factors (e.g., temperature, precipitation) are associated with infectious diseases (e.g., dengue, malaria) and cardiovascular and respiratory outcomes.                                                                                             |
| 22 | Dhimal    | 2015 | Nepal         | 1956-2014 | 1948-2098 | 50  | No  | Nepal                   |  | Meteorological  | Infectious diseases                                                           | Higher temperatures are associated with the distribution of vector-borne diseases.                                                                                                                                                                                 |
| 23 | Doocy     | 2013 | United States | 1975-2011 | 1974-2008 | 60  | No  |                         |  | Extreme weather | Mortality<br>Other                                                            | Cyclones are associated with mortality (e.g., drowning) and injuries.                                                                                                                                                                                              |
| 24 | Duan      | 2019 | China         | 2010-2018 | 2000-2016 | 51  | Yes | Southeast and East Asia |  | Meteorological  | Infectious diseases                                                           | Some meteorological factors (mean maximum temperature, rainfall, humidity and sunshine) are positively associated with Hand Foot Mouth disease (HFMD), whereas air pressure is negatively associated with this disease and wind speed is not associated with HFMD. |
| 25 | Fan       | 2015 | China         | 2004-2013 | 1985-2012 | 33  | Yes |                         |  | Meteorological  | Infectious diseases                                                           | Temperature is positively associated with transmission and incidence of Dengue.                                                                                                                                                                                    |
| 26 | Fernandez | 2015 | Australia     | 1995-2014 | NS        | 83  | No  |                         |  | Extreme weather | Mental health                                                                 | Floods are associated with negative mental health outcomes (e.g., PTSD, increased anxiety, depression, use of psychotropic medication). Conflicting evidence concerning suicide,                                                                                   |

|    |            |      |                |           |           |     |     |        |          |                |                                                                                                              |                                                                                                                                                                                 |
|----|------------|------|----------------|-----------|-----------|-----|-----|--------|----------|----------------|--------------------------------------------------------------------------------------------------------------|---------------------------------------------------------------------------------------------------------------------------------------------------------------------------------|
|    |            |      |                |           |           |     |     |        |          |                |                                                                                                              | tobacco, alcohol and substance abuse.                                                                                                                                           |
| 27 | Flouris    | 2018 | Greece         | 1954-2018 | NS        | 111 | Yes |        | Workers  | Meteorological | Occupational health and injuries                                                                             | High temperatures are positively associated with occupational heat strains, dehydration, kidney diseases and injuries.                                                          |
| 28 | Gao        | 2019 | China          | 1994-2018 | 1969-2015 | 16  | Yes |        |          | Meteorological | Mental health                                                                                                | Temperature increase is associated with suicide. No association between sunlight duration and suicide.                                                                          |
| 29 | Gao        | 2014 | China          | 1996-2012 | 1971-2010 | 37  | No  |        | Children | Meteorological | Infectious diseases<br>Respiratory, cardiovascular, and neurological outcomes<br>Skin diseases and allergies | Ambient humidity is associated with gastrointestinal, respiratory and allergic diseases in children.                                                                            |
| 30 | Ghanizadeh | 2017 | Iran           | 2009-2016 | 1990-2015 | 13  | No  |        |          | Meteorological | Mortality<br>Respiratory, cardiovascular, and neurological outcomes                                          | Meteorological factors, such as temperature and humidity, are associated with cardiopulmonary health. Cold temperatures are also associated with mortality from heart diseases. |
| 31 | Ghazani    | 2018 | Australia      | 2006-2017 | 1991-2011 | 11  | No  |        |          | Meteorological | Infectious diseases                                                                                          | Higher temperature is associated with bacterial gastrointestinal infections. Humidity and rainfall may influence this association.                                              |
| 32 | Gracia     | 2015 | Sweden         | 2003-2011 | 1959-2008 | 9   | No  | Europe |          | Meteorological | Infectious diseases                                                                                          | Temperature is positively associated with Human Puumala Hantavirus in some regions of Europe. Results concerning precipitation and humidity are contradictory or null.          |
| 33 | Hajat      | 2010 | United Kingdom | 1994-2008 | 1973-2003 | 11  | No  |        |          | Meteorological | Mortality                                                                                                    | Ambient heat is associated with mortality.                                                                                                                                      |

|    |         |      |                |           |           |    |     |                       |                        |                                                  |                                                                                                                                                                     |                                                                                                                                                                                                                                                                                                                                                                                                                                                                                                 |
|----|---------|------|----------------|-----------|-----------|----|-----|-----------------------|------------------------|--------------------------------------------------|---------------------------------------------------------------------------------------------------------------------------------------------------------------------|-------------------------------------------------------------------------------------------------------------------------------------------------------------------------------------------------------------------------------------------------------------------------------------------------------------------------------------------------------------------------------------------------------------------------------------------------------------------------------------------------|
| 34 | Hedlund | 2014 | Sweden         | 1970-2012 | 1750-2009 | 29 | No  | Arctic, sub-Arctic    | Vulnerable populations | Meteorological<br>Extreme weather                | Infectious diseases                                                                                                                                                 | Higher temperatures and flooding are associated with food- and water-borne diseases. This association is weaker for vector- and rodent-borne diseases. Air temperature and humidity seem to be associated with air-borne diseases.                                                                                                                                                                                                                                                              |
| 35 | Hii     | 2016 | Sweden         | 2007-2015 | 2003-2012 | 9  | No  | Malaysia              |                        | Meteorological                                   | Infectious diseases                                                                                                                                                 | Some meteorological factors (temperature, rainfall and humidity) are associated with Dengue, although these associations are inconsistent at times.                                                                                                                                                                                                                                                                                                                                             |
| 36 | Huang   | 2016 | Taiwan         | 1990-2014 | 1978-2011 | 19 | Yes |                       |                        | General                                          | Skin diseases and allergies                                                                                                                                         | Climate change, in general, may be associated with skin and soft-tissue infections.                                                                                                                                                                                                                                                                                                                                                                                                             |
| 37 | Kampe   | 2016 | United Kingdom | 1998-2015 | 1971-2010 | 13 | No  | High-income countries |                        | Meteorological                                   | Other                                                                                                                                                               | Higher temperature is associated with unintentional injuries.                                                                                                                                                                                                                                                                                                                                                                                                                                   |
| 38 | Khader  | 2015 | Jordan         | 2003-2014 | 1991-2012 | 78 | No  | Eastern Mediterranean | Vulnerable countries   | Meteorological<br>Extreme weather<br>Air quality | Infectious diseases<br>Mortality<br>Respiratory, cardiovascular, and neurological outcomes<br>Health systems<br>Mental health<br>Pregnancy and birth<br>Nutritional | High temperature is associated with mortality. Temperature, humidity and precipitation are associated with vector-, food- and water-borne diseases. Air pollution is associated with respiratory outcomes, although some findings are inconsistent. Higher temperature is associated with mental health outcomes and hospital admissions. Higher temperature may also be associated with adverse birth outcomes. Meteorological and extreme weather events are associated with food insecurity. |
| 39 | Klinger | 2014 | United Kingdom | 2011-2013 | NS        | 20 | No  |                       |                        | Extreme weather                                  | Health systems                                                                                                                                                      | Extreme weather events may lead to power outages which may pose challenges to healthcare quality.                                                                                                                                                                                                                                                                                                                                                                                               |

|    |        |      |                |           |           |     |     |             |                 |                                                  |                                                                      |                                                                                                                                                                                                                                 |
|----|--------|------|----------------|-----------|-----------|-----|-----|-------------|-----------------|--------------------------------------------------|----------------------------------------------------------------------|---------------------------------------------------------------------------------------------------------------------------------------------------------------------------------------------------------------------------------|
| 40 | Kuehn  | 2017 | United States  | 2002-2017 | NS        | 28  | No  |             | Pregnant people | Meteorological                                   | Pregnancy and birth                                                  | Extreme heat exposure is associated with adverse birth outcomes (e.g. stillbirth, birth weight).                                                                                                                                |
| 41 | Lake   | 2017 | United Kingdom | NS        | NS        | 66  | No  | Europe      |                 | General                                          | Respiratory, cardiovascular, and neurological outcomes               | Climate change may be associated with ragweed pollen allergy.                                                                                                                                                                   |
| 42 | Lal    | 2019 | Australia      | 1982-2011 | NS        | 36  | Yes |             | Children        | Meteorological                                   | Infectious diseases                                                  | Rainfall is associated with childhood diarrhea, although this association differed according to season and latitude.                                                                                                            |
| 43 | Lal    | 2015 | Australia      | NS        | NS        | 16  | No  | New Zealand |                 | Meteorological                                   | Infectious diseases                                                  | Temperature variability, higher temperature and rainfall are associated with enteric diseases.                                                                                                                                  |
| 44 | Lawton | 2019 | Australia      | 2000-2015 | NS        | 71  | No  |             |                 | Meteorological                                   | Mortality<br>Respiratory, cardiovascular, and neurological outcomes  | Heat exposure is associated with heat stroke, long-term neurological outcomes (e.g., cerebellar injury) and heat-related mortality.                                                                                             |
| 45 | Levi   | 2018 | Italy          | 2003-2017 | 1977-2014 | 184 | No  |             | Workers         | Meteorological                                   | Occupational health and injuries                                     | Heat exposure is associated with occupational injuries.                                                                                                                                                                         |
| 46 | Levy   | 2016 | United States  | 1972-2013 | 1948-2010 | 208 | No  |             |                 | Meteorological<br>Extreme weather                | Infectious diseases                                                  | Temperature is associated with bacterial diarrhea and drought is associated with all-cause diarrhea, although few studies explored the association between drought and diarrhea.                                                |
| 47 | Leyva  | 2017 | Asia           | 2009-2017 | NS        | 30  | No  |             | Elderly         | Meteorological<br>Extreme weather<br>Air quality | Infectious diseases<br>Mortality<br>Respiratory, cardiovascular, and | Meteorological factors, extreme weather events (e.g. typhoon, floods) and air pollution are associated with mortality and morbidity, especially cardiovascular- and respiratory-specific. Higher temperature is associated with |



|    |            |      |               |           |           |    |     |                             |  |                                   |                                                                                                                       |                                                                                                                                                                                                                                                                                 |
|----|------------|------|---------------|-----------|-----------|----|-----|-----------------------------|--|-----------------------------------|-----------------------------------------------------------------------------------------------------------------------|---------------------------------------------------------------------------------------------------------------------------------------------------------------------------------------------------------------------------------------------------------------------------------|
|    |            |      |               |           |           |    |     |                             |  |                                   | neurological outcomes<br>Health systems<br>Mental health                                                              | vector-borne diseases. Heat and cold temperatures are associated with hospital admissions. Flooding is associated with mental health outcomes (e.g. PTSD, depression).                                                                                                          |
| 48 | Li         | 2018 | China         | 1988-2017 | NS        | 81 | No  | China                       |  | Meteorological<br>Extreme weather | Infectious diseases                                                                                                   | Meteorological factors (temperature, precipitation, humidity, air pressure) and extreme weather events (floods, typhoons) are associated with Dengue fever in China.                                                                                                            |
| 49 | Lian       | 2015 | China         | 2003-2014 | NS        | 20 | Yes |                             |  | Meteorological                    | Mortality<br>Respiratory, cardiovascular, and neurological outcomes                                                   | Higher and lower temperatures are associated with stroke-related mortality and low temperatures are also associated with stroke-related morbidities.                                                                                                                            |
| 50 | Liu        | 2015 | United States | 1990-2014 | NS        | 61 | No  |                             |  | Air quality                       | Mortality<br>Respiratory, cardiovascular, and neurological outcomes<br>Health systems<br>Pregnancy and birth<br>Other | Wildfire smoke exposure is associated with mortality, respiratory outcomes and hospital admissions. Wildfire smoke exposure could also be associated with cardiovascular, ophthalmic and pregnancy outcomes, although more research is needed.                                  |
| 51 | Madaniyazi | 2015 | Australia     | 2004-2013 | 1961-2100 | 15 | No  |                             |  | Air quality                       | Mortality                                                                                                             | Air pollution is associated with future mortality.                                                                                                                                                                                                                              |
| 52 | Matysiak   | 2017 | Puerto Rico   | 2001-2005 | NS        | 26 | No  | Puerto Rico (United States) |  | Meteorological<br>Extreme weather | Infectious diseases                                                                                                   | Meteorological factors (higher temperature and increased rainfall) are associated with vector-borne diseases, such as Dengue and Zika. Extreme weather events are less researched, but the few studies investigating this association suggest no association between hurricanes |

|    |              |      |                |           |           |    |     |                                |                   |                                                  |                                                                                                                                                                    |                                                                                                                                                                                                                                                                                                                                                                                            |
|----|--------------|------|----------------|-----------|-----------|----|-----|--------------------------------|-------------------|--------------------------------------------------|--------------------------------------------------------------------------------------------------------------------------------------------------------------------|--------------------------------------------------------------------------------------------------------------------------------------------------------------------------------------------------------------------------------------------------------------------------------------------------------------------------------------------------------------------------------------------|
|    |              |      |                |           |           |    |     |                                |                   |                                                  |                                                                                                                                                                    | and floods and vector-borne diseases.                                                                                                                                                                                                                                                                                                                                                      |
| 53 | Moghaddamnia | 2017 | Iran           | 2011-2016 | 1979-2013 | 26 | Yes |                                |                   | Meteorological                                   | Mortality                                                                                                                                                          | Higher and lower temperature are associated with cardiovascular mortality.                                                                                                                                                                                                                                                                                                                 |
| 54 | Naish        | 2014 | Australia      | NS        | 1931-2010 | 16 | No  |                                |                   | Meteorological                                   | Infectious diseases                                                                                                                                                | Meteorological factors (especially temperature, rainfall and humidity) are associated with Dengue.                                                                                                                                                                                                                                                                                         |
| 55 | Nichols      | 2009 | United Kingdom | 1999-2008 | NS        | 36 | No  |                                |                   | Meteorological<br>Extreme weather<br>Air quality | Infectious diseases<br>Mortality<br>Respiratory, cardiovascular, and neurological outcomes<br>Mental health<br>Nutritional<br>Skin diseases and allergies<br>Other | Meteorological factors (e.g., higher temperature) are associated with mortality and various infectious diseases. Increased UV exposure is associated with skin cancer and cataracts. Extreme weather events are associated with mortality, injury, mental health outcomes, malnutrition, and food- and water-borne diseases. Air pollution is associated with cardio-respiratory outcomes. |
| 56 | Odame        | 2018 | United States  | 2006-2017 | 1893-2013 | 14 | Yes |                                | Rural populations | Meteorological                                   | Mortality                                                                                                                                                          | Higher temperature is associated with all-cause mortality and cardiovascular specific mortality.                                                                                                                                                                                                                                                                                           |
| 57 | Park         | 2017 | Korea          | 1920-2015 | 1961-2013 | 10 | Yes |                                |                   | Meteorological                                   | Other                                                                                                                                                              | Higher temperature is associated with acute gouty arthritis.                                                                                                                                                                                                                                                                                                                               |
| 58 | Phalkey      | 2015 | Germany        | 1989-2012 | 1982-2008 | 15 | No  | Low to middle-income countries | Children          | Meteorological<br>Extreme weather                | Nutritional                                                                                                                                                        | Meteorological factors (rainfall, temperature) and extreme weather events are associated with childhood undernutrition.                                                                                                                                                                                                                                                                    |
| 59 | Philipsborn  | 2016 | Georgia        | NS        | 1973-2010 | 28 | Yes |                                |                   | Meteorological                                   | Infectious diseases                                                                                                                                                | Higher temperature is associated with Diarrheagenic Escherichia coli. No significant relationship between rainfall and E. coli.                                                                                                                                                                                                                                                            |
| 60 | Phung        | 2015 | Australia      | 2004-2013 | NS        | 13 | No  | Southeast Asia                 |                   | Meteorological                                   | Infectious diseases                                                                                                                                                | Meteorological factors (temperature, humidity) and extreme weather                                                                                                                                                                                                                                                                                                                         |

1  
2  
3  
4  
5  
6  
7  
8  
9  
10  
11  
12  
13  
14  
15  
16  
17  
18  
19  
20  
21  
22  
23  
24  
25  
26  
27  
28  
29  
30  
31  
32  
33  
34  
35  
36  
37  
38  
39  
40  
41  
42  
43  
44  
45  
46  
47

|    |          |      |               |           |           |    |    |                                |                         |                                   |                                                                                                             |                                                                                                                                                                                                                              |
|----|----------|------|---------------|-----------|-----------|----|----|--------------------------------|-------------------------|-----------------------------------|-------------------------------------------------------------------------------------------------------------|------------------------------------------------------------------------------------------------------------------------------------------------------------------------------------------------------------------------------|
|    |          |      |               |           |           |    |    |                                |                         | Extreme weather                   |                                                                                                             | events (flooding) are associated with vector- and water-borne infectious diseases.                                                                                                                                           |
| 61 | Porpora  | 2019 | Italy         | 1964-2019 | NS        | 78 | No |                                |                         | Other                             | Pregnancy and birth                                                                                         | Environmental pollutants may be associated with preterm birth, however this association remains unclear due to conflicting evidence.                                                                                         |
| 62 | Poursafa | 2015 | Iran          | 2001-2013 | NS        | 15 | No |                                |                         | Meteorological                    | Pregnancy and birth                                                                                         | Meteorological factors (higher temperature, lower temperature, humidity, sunlight intensity) are associated with adverse birth outcomes (low birth weight, preterm birth, hypertension, eclampsia).                          |
| 63 | Racloz   | 2012 | Australia     | NS        | NS        | 63 | No |                                |                         | Meteorological                    | Infectious diseases                                                                                         | Higher temperature, increased precipitation and humidity are associated with Dengue.                                                                                                                                         |
| 64 | Rataj    | 2016 | Germany       | 1981-2012 | 1978-2008 | 17 | No | Low to middle income countries |                         | Extreme weather                   | Mental health<br>Other                                                                                      | Extreme weather events are associated with mental health outcomes (e.g., PTSD, anxiety, depression) and injuries.                                                                                                            |
| 65 | Reid     | 2016 | United States | 1990-2015 | NS        | 53 | No |                                | Susceptible populations | Air quality                       | Mortality<br>Respiratory, cardiovascular, and neurological outcomes<br>Mental health<br>Pregnancy and birth | Wildfire smoke exposure is associated with respiratory outcomes (e.g., asthma) and mortality. Wildfire smoke exposure may be associated with cardiovascular, birth, and mental health outcomes, but more research is needed. |
| 66 | Rifkin   | 2018 | United States | 1995-2017 | 1992-2016 | 16 | No |                                |                         | Meteorological<br>Extreme weather | Other                                                                                                       | Temperature and extreme weather events (hurricanes) are associated with sleep quality.                                                                                                                                       |
| 67 | Salve    | 2018 | India         | NS        | NS        | 11 | No | India                          |                         | Meteorological                    | Mortality<br>Health systems<br>Nutritional                                                                  | Increase in temperature is associated with all-cause mortality, cause-specific mortality (e.g., myocardial                                                                                                                   |

|    |            |      |                |           |                         |            |     |                      |  |                 |                                                                                                                                     |                                                                                                                                                                                            |
|----|------------|------|----------------|-----------|-------------------------|------------|-----|----------------------|--|-----------------|-------------------------------------------------------------------------------------------------------------------------------------|--------------------------------------------------------------------------------------------------------------------------------------------------------------------------------------------|
|    |            |      |                |           |                         |            |     |                      |  |                 |                                                                                                                                     | infarctions, stroke, heart diseases), hospitalizations (e.g., heat-related admissions, neonatal intensive unit admissions), and food insecurity and malnutrition, via agricultural issues. |
| 68 | Sanderson  | 2017 | United Kingdom | 1988-2017 | 1900-2101               | 63         | No  |                      |  | Meteorological  | Mortality                                                                                                                           | Higher temperatures and heat waves are associated with mortality and heat-related mortality is likely to increase with increased temperatures.                                             |
| 69 | Sawatzky   | 2018 | Canada         | 2005-2016 | NS                      | 85         | No  | Arctic and Subarctic |  | General         | Health systems                                                                                                                      | Climate change, in general, is associated with a strain in public health resources, via population health issues and surveillance systems may guide future adaptation to climate change.   |
| 70 | Semenza    | 2012 | Sweden         | 1998-2009 | 1995-2007               | 722        | No  |                      |  | Meteorological  | Infectious diseases                                                                                                                 | Meteorological factors (temperature, rainfall) are associated with some food- and water-borne diseases.                                                                                    |
| 71 | Stanke     | 2013 | United Kingdom | 1967-2011 | 1876-1879 and 1961-2010 | 87         | No  |                      |  | Extreme weather | Infectious diseases<br>Mortality<br>Respiratory, cardiovascular, and neurological outcomes<br>Mental health<br>Nutritional<br>Other | Droughts are associated with malnutrition, mortality, infectious diseases, cardiovascular and respiratory outcomes, mental health (e.g., increased worry, anxiety), injuries, and cancer.  |
| 72 | Stensgaard | 2019 | Denmark        | 1995-2017 | NS                      | 20         | No  |                      |  | Meteorological  | Infectious diseases                                                                                                                 | Meteorological factors (temperature, precipitation, humidity) are associated with schistosomiasis and increasing temperatures are likely to affect the geographic range of this parasite.  |
| 73 | Sun        | 2018 | China          | 1999-2017 | 1974-2014               | 30(review) | Yes |                      |  | Meteorological  | Mortality                                                                                                                           | Heat and cold exposure are associated with myocardial                                                                                                                                      |

1  
2  
3  
4  
5  
6  
7  
8  
9  
10  
11  
12  
13  
14  
15  
16  
17  
18  
19  
20  
21  
22  
23  
24  
25  
26  
27  
28  
29  
30  
31  
32  
33  
34  
35  
36  
37  
38  
39  
40  
41  
42  
43  
44  
45  
46  
47

|    |                 |      |                  |               |               |                                   |    |               |          |                                          |                                                                                      |                                                                                                                                                                                                                                                                                                                                                                                                                      |
|----|-----------------|------|------------------|---------------|---------------|-----------------------------------|----|---------------|----------|------------------------------------------|--------------------------------------------------------------------------------------|----------------------------------------------------------------------------------------------------------------------------------------------------------------------------------------------------------------------------------------------------------------------------------------------------------------------------------------------------------------------------------------------------------------------|
|    |                 |      |                  |               |               | w)2<br>3m<br>eta-<br>anal<br>ysis |    |               |          |                                          | Respiratory,<br>cardiovascular,<br>and<br>neurological<br>outcomes<br>Health systems | infarctions (MI) and hospitalization<br>for MI. Heat exposure is associated<br>with MI-specific mortality.                                                                                                                                                                                                                                                                                                           |
| 74 | Swynghe<br>dauw | 2009 | France           | NS            | NS            | NS                                | No |               |          | Meteorolo<br>gical<br>Extreme<br>weather | Infectious<br>diseases<br>Mortality<br>Skin diseases<br>and allergies<br>Other       | Heat and cold exposure are<br>associated with mortality and more<br>specifically, respiratory- and<br>cardiovascular-specific mortality.<br>Exposure to UV is associated with<br>skin cancer and cataracts. Higher<br>temperatures are associated with<br>infectious diseases (mosquito- and<br>food-borne diseases) and extreme<br>weather events are associated with<br>undernutrition and food-borne<br>diseases. |
| 75 | Tall            | 2014 | Australi<br>a    | 1946-<br>2009 | 1886-<br>2006 | 22                                | No | Australi<br>a |          | Extreme<br>weather                       | Infectious<br>diseases                                                               | There is no strong evidence for the<br>association between flooding and<br>the Ross River Virus.                                                                                                                                                                                                                                                                                                                     |
| 76 | Varghese        | 2018 | Australi<br>a    | 1983-<br>2017 | 1922-<br>2017 | 26                                | No |               | Workers  | Meteorolo<br>gical                       | Occupational<br>health and<br>injuries                                               | Heat is associated with occupational<br>injuries in many contexts of work<br>(e.g., agriculture, transport,<br>construction, fishing).                                                                                                                                                                                                                                                                               |
| 77 | Veenema         | 2017 | United<br>States | 2006-<br>2016 | NS            | 47                                | No |               |          | Extreme<br>weather                       | Infectious<br>diseases<br>Mortality<br>Mental health                                 | Extreme water-related weather<br>events are associated with<br>mortality, water- and vector-borne<br>infectious diseases, mental health<br>issues (e.g., PTSD, depression,<br>anxiety).                                                                                                                                                                                                                              |
| 78 | Vilcins         | 2018 | Australi<br>a    | NS            | NS            | 72                                | No |               | Children | Other                                    | Nutritional                                                                          | Certain environmental risk factors<br>(e.g., sanitation, cooking fuels),<br>which could be aggravated by<br>climate change, may be associated<br>with childhood stunting.                                                                                                                                                                                                                                            |
| 79 | Vins            | 2015 | United<br>States | 1995-<br>2005 | NS            | 82                                | No |               |          | Extreme<br>weather                       | Mental health                                                                        | Drought is likely associated with<br>adverse mental health outcomes.                                                                                                                                                                                                                                                                                                                                                 |

|    |             |      |               |           |           |    |     |                    |                               |                         |                                                                                                              |                                                                                                                                                                                                                                                                                                               |
|----|-------------|------|---------------|-----------|-----------|----|-----|--------------------|-------------------------------|-------------------------|--------------------------------------------------------------------------------------------------------------|---------------------------------------------------------------------------------------------------------------------------------------------------------------------------------------------------------------------------------------------------------------------------------------------------------------|
| 80 | Waits       | 2018 | Finland       | 1970-2017 | NS        | 43 | No  | Arctic             |                               | Meteorological          | Infectious diseases                                                                                          | Meteorological factors (especially higher temperature and precipitation) are associated with infectious diseases (e.g. tick borne diseases, tularemia) in the Arctic.                                                                                                                                         |
| 81 | Wald        | 2019 | United States | 2009-2018 | NS        | 17 | No  | United States      |                               | Meteorological          | Health systems                                                                                               | Higher temperature is associated with emergency department (heat-related visits) visits and costs for healthcare systems.                                                                                                                                                                                     |
| 82 | Welch       | 2019 | United States | NS        | NS        | 91 | No  |                    |                               | Meteorological          | Infectious diseases                                                                                          | Meteorological factors (temperature, precipitation) are associated with Salmonella.                                                                                                                                                                                                                           |
| 83 | Wimalawansa | 2016 | United States | NS        | NS        | NS | No  | Tropical Countries | Workers                       | Meteorological<br>Other | Occupational health and injuries                                                                             | Increasing temperatures and environmental pollution (e.g., heavy metals, fertilizers) are associated with occupational health outcomes, such as chronic kidney disease of multifactorial origin.                                                                                                              |
| 84 | Witt        | 2015 | Germany       | NS        | NS        | 33 | Yes |                    | Chronic lung disease patients | Meteorological          | Mortality<br>Respiratory, cardiovascular, and neurological outcomes                                          | Heat is associated with lung disease outcomes and mortality in patients with chronic lung diseases.                                                                                                                                                                                                           |
| 85 | Xu          | 2018 | Australia     | 2004-2016 | 1978-2013 | 19 | No  |                    | Children                      | Meteorological          | Respiratory, cardiovascular, and neurological outcomes                                                       | Heat and cold temperatures are associated with childhood asthma.                                                                                                                                                                                                                                              |
| 86 | Xu          | 2012 | Australia     | 2000-2012 | 1983-2010 | 33 | No  |                    | Children                      | Meteorological          | Infectious diseases<br>Mortality<br>Respiratory, cardiovascular, and neurological outcomes<br>Health systems | Heat and cold are associated with hospital admissions and mortality in children. Temperature is also associated with various infectious diseases (e.g., HFMD, malaria), respiratory diseases (e.g., asthma) and skin outcomes (e.g. eczema). For example, high temperature is associated with Hand Foot Mouth |

|    |          |      |           |           |                        |    |     |  |          |                |                                                                                                              |                                                                                                                                                                                                                           |
|----|----------|------|-----------|-----------|------------------------|----|-----|--|----------|----------------|--------------------------------------------------------------------------------------------------------------|---------------------------------------------------------------------------------------------------------------------------------------------------------------------------------------------------------------------------|
|    |          |      |           |           |                        |    |     |  |          |                | Skin diseases and allergies<br>Other                                                                         | Disease and renal diseases and low temperature is associated with eczema.                                                                                                                                                 |
| 87 | Xu       | 2016 | Australia | 2001-2015 | NS                     | 60 | Yes |  |          | Meteorological | Mortality                                                                                                    | Heat waves are associated with mortality and it seems that the intensity of heatwaves is particularly important compared to length of heatwave.                                                                           |
| 88 | Xu       | 2014 | Australia | 1998-2012 | 1983-2009              | 12 | No  |  | Children | Meteorological | Mortality<br>Respiratory, cardiovascular, and neurological outcomes<br>Health systems<br>Other               | Heat waves are associated with hospital admissions, respiratory diseases, renal diseases, fever and electrolyte imbalances. Evidence concerning the association between heatwaves and children mortality is inconsistent. |
| 89 | Youssouf | 2014 | France    | 1990-2011 | 1987-2008              | 94 | No  |  |          | Air quality    | Mortality<br>Respiratory, cardiovascular, and neurological outcomes<br>Health systems<br>Pregnancy and birth | Wildfire smoke exposure is associated with mortality, respiratory and cardiovascular outcomes, hospital admissions. Wildfire smoke exposure may also be associated with adverse birth outcomes (low birth weight).        |
| 90 | Yu       | 2015 | Australia | 1998-2012 | 1961-1990 et 2020-2100 | 20 | No  |  |          | Meteorological | Infectious diseases                                                                                          | Meteorological factors (temperature, rainfall, humidity) may be associated with future malaria transmission, although findings are inconsistent, partly according to geographical focus.                                  |
| 91 | Yu       | 2012 | Australia | 1997-2008 | 1973-2006              | 15 | Yes |  | Elderly  | Meteorological | Mortality                                                                                                    | Heat and cold temperatures are associated with mortality for the elderly, although heat-related associations seem stronger than cold-related associations.                                                                |

1  
2  
3  
4  
5  
6  
7  
8  
9  
10  
11  
12  
13  
14  
15  
16  
17  
18  
19  
20  
21  
22  
23  
24  
25  
26  
27  
28  
29  
30  
31  
32  
33  
34  
35  
36  
37  
38  
39  
40  
41  
42  
43  
44  
45  
46  
47

|    |       |      |           |           |           |     |    |  |                          |                |                                                                                                                                                |                                                                                                                                                                                                                                                                                                                   |
|----|-------|------|-----------|-----------|-----------|-----|----|--|--------------------------|----------------|------------------------------------------------------------------------------------------------------------------------------------------------|-------------------------------------------------------------------------------------------------------------------------------------------------------------------------------------------------------------------------------------------------------------------------------------------------------------------|
| 92 | Zhang | 2007 | Australia | NS        | NS        | NS  | No |  | People with disabilities | General        | Other                                                                                                                                          | Climate change, in general, may be associated with disability-adjusted life years (DALY), and the cost of DALY could be particularly important in low to middle income countries.                                                                                                                                 |
| 93 | Zhang | 2017 | China     | 1997-2016 | 1981-2012 | 36  | No |  | Pregnant people          | Meteorological | Pregnancy and birth                                                                                                                            | High temperature is associated with adverse birth outcomes, such as preterm birth, low birth weight and stillbirth. Low temperature is also associated with some adverse birth outcomes, including preterm birth and low birth, although the evidence is stronger for high temperature than for low temperatures. |
| 94 | Zuo   | 2015 | Australia | NS        | NS        | 173 | No |  |                          | Meteorological | Mortality<br>Respiratory, cardiovascular, and neurological outcomes<br>Health systems<br>Mental health<br>Skin diseases and allergies<br>Other | Heat waves are associated with mortality, hospital admissions, sunburn, heat exhaustion, cardiovascular outcomes (e.g., heart attacks) and mental health outcomes.                                                                                                                                                |

\*NS = non-specified



**Appendix 4.** Summary of quality assessment according to revised AMSTAR-2 items. (Y = yes, PY = partial yes, N = no, NA = non-applicable).

| First author | Year | AMSTAR-2 Items |    |   |    |    |   |    |    |    |    |    |    |    |    |    |    |    |
|--------------|------|----------------|----|---|----|----|---|----|----|----|----|----|----|----|----|----|----|----|
|              |      | 1              | 1b | 2 | 3  | 4  | 5 | 6  | 7  | 8  | 9  | 10 | 11 | 12 | 13 | 14 | 15 | 16 |
| Alderman     | 2012 | Y              | N  | N | PY | PY | N | N  | PY | PY | N  | N  | NA | NA | Y  | N  | NA | N  |
| Amegah       | 2016 | Y              | N  | N | Y  | PY | N | N  | PY | Y  | Y  | N  | NA | NA | Y  | Y  | NA | Y  |
| An           | 2018 | N              | Y  | N | N  | PY | Y | N  | Y  | N  | Y  | N  | NA | NA | Y  | N  | NA | Y  |
| Augustin     | 2008 | Y              | Y  | N | N  | PY | N | N  | PY | N  | PY | N  | NA | NA | Y  | N  | NA | Y  |
| Babaie       | 2018 | Y              | Y  | N | N  | PY | Y | N  | Y  | PY | N  | N  | NA | NA | N  | N  | NA | N  |
| Bai          | 2013 | Y              | Y  | N | PY | PY | N | N  | PY | PY | Y  | N  | NA | NA | Y  | N  | NA | Y  |
| Benevolenza  | 2019 | Y              | Y  | N | PY | N  | N | N  | Y  | PY | PY | N  | NA | NA | Y  | N  | NA | N  |
| Berhane      | 2016 | Y              | N  | Y | N  | N  | N | N  | N  | PY | PY | N  | NA | NA | Y  | N  | NA | N  |
| Bernhardt    | 2019 | Y              | N  | N | N  | N  | N | N  | PY | PY | PY | N  | NA | NA | PY | N  | NA | Y  |
| Binazzi      | 2019 | Y              | Y  | N | Y  | PY | Y | N  | Y  | Y  | Y  | N  | Y  | Y  | Y  | Y  | Y  | Y  |
| Bonafede     | 2016 | Y              | N  | N | PY | PY | Y | N  | Y  | Y  | Y  | N  | NA | NA | Y  | Y  | NA | Y  |
| Brown        | 2013 | Y              | Y  | N | PY | PY | N | N  | Y  | Y  | PY | N  | NA | NA | Y  | Y  | NA | Y  |
| Bunker       | 2016 | Y              | Y  | N | Y  | N  | Y | PY | Y  | Y  | PY | N  | Y  | Y  | Y  | Y  | Y  | Y  |
| Campbell     | 2018 | Y              | N  | N | N  | PY | N | N  | Y  | PY | N  | N  | NA | NA | Y  | PY | NA | Y  |
| Cann         | 2013 | Y              | Y  | Y | PY | PY | N | N  | Y  | PY | PY | N  | NA | NA | Y  | Y  | NA | Y  |
| Carolan-Olah | 2014 | Y              | Y  | N | N  | PY | N | N  | Y  | PY | Y  | N  | NA | NA | PY | PY | NA | N  |
| Cheng        | 2014 | Y              | N  | N | PY | PY | N | N  | Y  | Y  | Y  | N  | NA | NA | Y  | PY | NA | N  |
| Coates       | 2019 | N              | N  | N | N  | N  | N | N  | PY | PY | Y  | N  | NA | NA | Y  | PY | NA | N  |
| Cong         | 2017 | N              | Y  | N | N  | PY | N | Y  | Y  | Y  | Y  | N  | Y  | N  | Y  | Y  | Y  | Y  |
| Cunrui       | 2011 | Y              | N  | N | PY | PY | N | N  | Y  | PY | N  | N  | NA | NA | Y  | N  | NA | Y  |
| deSousa      | 2018 | Y              | N  | N | PY | PY | N | N  | Y  | N  | N  | N  | NA | NA | Y  | N  | NA | Y  |
| Dhimal       | 2015 | Y              | Y  | N | PY | PY | N | N  | Y  | Y  | N  | N  | NA | NA | N  | N  | NA | N  |
| Doocy        | 2013 | Y              | N  | N | N  | PY | Y | N  | Y  | Y  | N  | N  | NA | NA | Y  | PY | NA | Y  |
| Duan         | 2019 | Y              | N  | N | N  | PY | N | N  | Y  | PY | Y  | N  | Y  | Y  | Y  | Y  | Y  | Y  |
| Fan          | 2015 | N              | Y  | N | N  | PY | Y | Y  | PY | PY | Y  | N  | Y  | Y  | Y  | Y  | Y  | Y  |
| Fernandez    | 2015 | Y              | Y  | N | PY | PY | Y | N  | Y  | PY | PY | N  | NA | NA | Y  | N  | NA | N  |
| Flouris      | 2018 | Y              | N  | Y | PY | PY | Y | Y  | Y  | Y  | Y  | Y  | Y  | Y  | Y  | Y  | Y  | Y  |

|             |      |   |   |   |    |    |   |    |    |    |    |   |    |    |   |    |    |   |
|-------------|------|---|---|---|----|----|---|----|----|----|----|---|----|----|---|----|----|---|
| Gao         | 2019 | N | Y | N | PY | PY | Y | N  | Y  | Y  | Y  | N | Y  | Y  | Y | Y  | Y  | Y |
| Gao         | 2014 | Y | N | N | PY | PY | N | PY | Y  | Y  | Y  | N | NA | NA | Y | Y  | NA | Y |
| Ghanizadeh  | 2017 | N | Y | N | PY | N  | Y | PY | Y  | PY | Y  | N | NA | NA | N | N  | NA | Y |
| Ghazani     | 2018 | N | N | N | N  | PY | Y | N  | Y  | Y  | PY | N | NA | NA | Y | PY | NA | Y |
| Gracia      | 2015 | Y | Y | N | PY | PY | Y | N  | Y  | PY | Y  | N | NA | NA | Y | N  | NA | Y |
| Hajat       | 2010 | Y | N | N | Y  | PY | N | N  | Y  | PY | N  | N | NA | NA | N | PY | NA | Y |
| Hedlund     | 2014 | Y | N | N | PY | N  | Y | Y  | Y  | PY | Y  | N | NA | NA | Y | N  | NA | Y |
| Hii         | 2016 | Y | N | N | PY | PY | N | N  | PY | PY | N  | N | NA | NA | N | N  | NA | Y |
| Huang       | 2016 | N | N | N | N  | PY | Y | N  | PY | Y  | Y  | N | Y  | Y  | Y | PY | N  | Y |
| Kampe       | 2016 | Y | N | N | PY | PY | Y | N  | Y  | Y  | PY | N | NA | NA | Y | N  | NA | Y |
| Khader      | 2015 | Y | N | N | PY | PY | Y | N  | Y  | Y  | N  | N | NA | NA | Y | PY | NA | Y |
| Klinger     | 2014 | N | N | N | N  | PY | Y | N  | Y  | N  | Y  | N | NA | NA | Y | N  | NA | Y |
| Kuehn       | 2017 | Y | N | N | N  | PY | N | N  | Y  | Y  | PY | N | NA | NA | Y | N  | NA | Y |
| Lake        | 2017 | Y | Y | N | N  | PY | Y | Y  | PY | PY | N  | N | NA | NA | N | N  | NA | Y |
| Lal         | 2019 | Y | N | Y | N  | PY | N | Y  | Y  | PY | Y  | N | Y  | Y  | Y | Y  | N  | Y |
| Lal         | 2015 | Y | Y | N | N  | PY | N | N  | Y  | PY | PY | N | NA | NA | Y | PY | NA | Y |
| Lawton      | 2019 | Y | N | N | PY | PY | N | N  | Y  | Y  | N  | N | NA | NA | Y | N  | NA | Y |
| Levi        | 2018 | Y | Y | N | PY | PY | Y | N  | Y  | Y  | N  | N | NA | NA | Y | PY | NA | Y |
| Levy        | 2016 | N | N | N | PY | PY | Y | PY | Y  | Y  | Y  | N | NA | NA | Y | Y  | NA | Y |
| Leyva       | 2017 | Y | Y | N | PY | PY | N | N  | Y  | N  | Y  | N | NA | NA | Y | N  | NA | N |
| Li          | 2018 | Y | N | N | N  | PY | N | N  | N  | PY | N  | N | NA | NA | N | N  | NA | Y |
| Lian        | 2015 | Y | N | N | PY | PY | Y | Y  | Y  | N  | Y  | N | Y  | Y  | Y | Y  | Y  | Y |
| Liu         | 2015 | Y | Y | N | Y  | PY | N | N  | Y  | Y  | PY | N | NA | NA | Y | PY | NA | Y |
| Madaniyazi  | 2015 | N | N | N | PY | PY | N | N  | Y  | PY | N  | N | NA | NA | Y | N  | NA | Y |
| Matysiak    | 2017 | Y | Y | N | PY | PY | N | N  | Y  | PY | Y  | N | NA | NA | Y | N  | NA | Y |
| Moghadamnia | 2017 | Y | N | N | PY | PY | Y | N  | Y  | Y  | Y  | N | Y  | N  | Y | Y  | N  | Y |
| Naish       | 2014 | Y | Y | N | PY | PY | N | N  | PY | PY | PY | N | NA | NA | Y | N  | NA | Y |
| Nichols     | 2009 | Y | N | N | PY | PY | Y | Y  | Y  | Y  | N  | N | NA | NA | N | N  | NA | Y |
| Odame       | 2018 | Y | N | N | PY | PY | N | N  | PY | PY | N  | N | Y  | N  | Y | Y  | Y  | Y |
| Park        | 2017 | Y | N | N | N  | PY | Y | Y  | N  | PY | Y  | N | Y  | PY | Y | Y  | N  | Y |
| Phalkey     | 2015 | Y | Y | N | PY | PY | Y | Y  | Y  | PY | PY | N | NA | NA | Y | N  | NA | Y |

|             |      |   |   |   |    |    |   |   |    |    |    |   |    |    |   |    |    |   |
|-------------|------|---|---|---|----|----|---|---|----|----|----|---|----|----|---|----|----|---|
| Philipsborn | 2016 | Y | Y | N | PY | N  | N | N | Y  | PY | N  | N | Y  | Y  | N | Y  | N  | Y |
| Phung       | 2015 | Y | Y | N | N  | PY | N | N | Y  | Y  | PY | Y | NA | NA | N | N  | NA | Y |
| Porpora     | 2019 | Y | Y | Y | PY | PY | N | N | Y  | PY | N  | N | NA | NA | N | Y  | NA | Y |
| Poursafa    | 2015 | Y | N | N | PY | PY | Y | Y | PY | Y  | PY | N | NA | NA | Y | Y  | NA | Y |
| Racloz      | 2012 | Y | N | N | N  | PY | N | N | N  | PY | N  | N | NA | NA | Y | Y  | NA | Y |
| Rataj       | 2016 | Y | Y | Y | PY | PY | Y | Y | PY | PY | Y  | N | NA | NA | Y | Y  | NA | Y |
| Reid        | 2016 | Y | N | N | PY | PY | N | N | N  | PY | PY | N | NA | NA | Y | PY | NA | Y |
| Rifkin      | 2018 | Y | Y | Y | PY | PY | Y | Y | Y  | PY | N  | N | NA | NA | Y | N  | NA | Y |
| Salve       | 2018 | Y | Y | N | N  | PY | Y | Y | PY | PY | N  | N | NA | NA | Y | N  | NA | Y |
| Sanderson   | 2017 | Y | Y | N | N  | PY | Y | N | Y  | PY | PY | N | NA | NA | Y | N  | NA | Y |
| Sawatzky    | 2018 | Y | Y | N | N  | PY | Y | N | Y  | N  | N  | N | NA | NA | N | N  | NA | Y |
| Semenza     | 2012 | N | N | N | N  | N  | N | N | N  | N  | Y  | N | NA | NA | N | N  | NA | N |
| Stanke      | 2013 | Y | N | N | PY | PY | N | N | Y  | PY | N  | N | NA | NA | Y | N  | NA | Y |
| Stensgaard  | 2019 | Y | Y | N | N  | PY | N | Y | N  | PY | N  | N | NA | NA | N | N  | NA | Y |
| Sun         | 2018 | Y | Y | N | PY | PY | N | Y | Y  | Y  | Y  | N | Y  | Y  | Y | Y  | Y  | Y |
| Swynghedauw | 2009 | Y | Y | N | N  | N  | N | N | N  | N  | N  | N | NA | NA | N | N  | NA | Y |
| Tall        | 2014 | Y | N | N | N  | PY | N | N | Y  | Y  | PY | N | NA | NA | Y | N  | NA | Y |
| Varghese    | 2018 | Y | N | N | N  | PY | N | N | Y  | Y  | N  | N | NA | NA | Y | N  | NA | Y |
| Veenema     | 2017 | Y | N | Y | N  | PY | N | N | Y  | N  | PY | N | NA | NA | N | N  | NA | N |
| Vilcins     | 2018 | Y | N | Y | N  | PY | N | N | Y  | N  | Y  | N | NA | NA | Y | N  | NA | Y |
| Vins        | 2015 | Y | Y | N | N  | PY | N | N | Y  | N  | N  | N | NA | NA | Y | PY | NA | Y |
| Waits       | 2018 | Y | Y | N | N  | PY | N | N | Y  | N  | N  | N | NA | NA | N | N  | NA | Y |
| Wald        | 2019 | Y | N | N | N  | PY | N | N | Y  | Y  | N  | N | NA | NA | Y | N  | NA | N |
| Welch       | 2019 | Y | Y | N | N  | N  | N | N | PY | PY | N  | N | NA | NA | N | N  | NA | N |
| Wimalawansa | 2016 | Y | N | N | N  | N  | N | N | N  | N  | N  | N | NA | NA | N | N  | NA | Y |
| Witt        | 2015 | Y | N | N | N  | PY | N | N | Y  | N  | N  | N | N  | Y  | Y | N  | N  | Y |
| Xu          | 2018 | Y | N | N | PY | PY | N | N | PY | PY | N  | N | NA | NA | Y | N  | NA | Y |
| Xu          | 2012 | Y | N | N | PY | PY | N | N | PY | Y  | PY | N | NA | NA | N | N  | NA | Y |
| Xu          | 2016 | Y | N | N | PY | PY | N | N | Y  | Y  | N  | N | Y  | N  | Y | Y  | N  | Y |
| Xu          | 2014 | Y | Y | N | N  | PY | N | N | Y  | Y  | N  | N | NA | NA | N | Y  | NA | N |
| Youssef     | 2014 | Y | Y | N | PY | PY | N | N | Y  | Y  | N  | N | NA | NA | Y | N  | NA | Y |

|       |                        |    |    |    |    |    |    |    |    |    |    |    |    |    |    |    |    |    |
|-------|------------------------|----|----|----|----|----|----|----|----|----|----|----|----|----|----|----|----|----|
| Yu    | 2015                   | N  | N  | N  | PY | PY | N  | N  | Y  | Y  | N  | N  | NA | NA | Y  | PY | NA | Y  |
| Yu    | 2012                   | Y  | Y  | N  | PY | N  | N  | Y  | Y  | Y  | N  | N  | Y  | N  | Y  | Y  | Y  | Y  |
| Zhang | 2007                   | Y  | N  | N  | N  | N  | N  | N  | N  | N  | N  | N  | NA | NA | Y  | N  | NA | N  |
| Zhang | 2017                   | Y  | Y  | N  | PY | PY | N  | N  | PY | Y  | Y  | N  | NA | NA | Y  | Y  | NA | Y  |
| Zuo   | 2015                   | Y  | Y  | N  | N  | PY | N  | N  | N  | N  | N  | N  | NA | NA | N  | N  | NA | Y  |
| TOTAL | Yes                    | 81 | 44 | 9  | 5  | 0  | 32 | 17 | 64 | 36 | 31 | 2  | 17 | 12 | 70 | 28 | 11 | 78 |
|       | Partial<br>Yes         | 0  | 0  | 0  | 47 | 80 | 0  | 4  | 19 | 41 | 22 | 0  | 0  | 1  | 2  | 15 | 0  | 0  |
|       | No                     | 13 | 50 | 85 | 42 | 14 | 62 | 73 | 11 | 17 | 41 | 92 | 1  | 5  | 22 | 51 | 7  | 16 |
|       | Not-<br>Applic<br>able | 0  | 0  | 0  | 0  | 0  | 0  | 0  | 0  | 0  | 0  | 0  | 0  | 76 | 76 | 0  | 0  | 76 |

**Appendix 5.** Summary table of publications according to climate impact and health outcome according to frequencies and references. References with a \* explore only this specific combination of climate impact and health outcome and therefore appear only once in this table. Number of studies and references (according to alphabetical order) for each combination of categories are presented in the cells. Empty cells in this Table indicate an absence of studies at this combination of categories.

| Health Outcome                                     | Climate Impact                                                                                                                                                                                                                                                                                                                              |                                                                                                                                           |                                                                    |                              |           |
|----------------------------------------------------|---------------------------------------------------------------------------------------------------------------------------------------------------------------------------------------------------------------------------------------------------------------------------------------------------------------------------------------------|-------------------------------------------------------------------------------------------------------------------------------------------|--------------------------------------------------------------------|------------------------------|-----------|
|                                                    | Meteorological (71)                                                                                                                                                                                                                                                                                                                         | Extreme weather (24)                                                                                                                      | Air quality (7)                                                    | General (5)                  | Other (3) |
| Infectious diseases (41)                           | <p><b>35</b></p> <p>Amegah, Babaie*, Bai*, Berhane, Bernhardt*, Cheng, Coates*, de Sousa, Dhimal*, Duan*, Fan*, Gao 2014, Ghazani*, Gracia*, Hedlund, Hii*, Khader, Lal 2015*, Lal 2019*, Levy, Leyva, Li, Matysiak, Naish*, Nichols, Philipsborn*, Phung, Racloz*, Semenza*, Stensgaard, Swynghedau, Waits*, Welch*, Xu 2012, Yu 2015*</p> | <p><b>14</b></p> <p>Alderman, Berhane, Brown*, Cann*, Hedlund, Levy, Li, Matysiak, Nichols, Phung, Stanke, Swynghedau, Tall*, Veenema</p> |                                                                    |                              |           |
| Mortality (32)                                     | <p><b>24</b></p> <p>Amegah, Bunker, Campbell, Cheng, Cunrui*, Ghanizadeh, Hajat*, Khader, Lawton, Leyva, Lian, Moghdamnia*, Nichols, Odame*, Salve, Sanderson*, Sun, Swynghedau, Witt, Xu 2012, Xu 2014, Xu 2016*, Yu 2012*, Zuo</p>                                                                                                        | <p><b>5</b></p> <p>Alderman, Doocy, Leyva, Stanke, Veenema</p>                                                                            | <p><b>5</b></p> <p>Leyva, Liu, Madniyazi*, Reid, Youssouf</p>      |                              |           |
| Respiratory, cardiovascular, and neurological (23) | <p><b>17</b></p> <p>Amegah, Bunker, Cheng, Cong*, de Sousa, Gao 2014, Ghanizadeh, Lawton, Leyva, Lian, Nichols, Sun, Witt, Xu 2012, Xu 2014, Xu 2018*, Zuo</p>                                                                                                                                                                              | <p><b>1</b></p> <p>Stanke</p>                                                                                                             | <p><b>6</b></p> <p>Khader, Leyva, Liu, Nichols, Reid, Youssouf</p> | <p><b>1</b></p> <p>Lake*</p> |           |

|                                                                      |                                      |                                                                                                |                                                                                              |                                 |                         |                        |
|----------------------------------------------------------------------|--------------------------------------|------------------------------------------------------------------------------------------------|----------------------------------------------------------------------------------------------|---------------------------------|-------------------------|------------------------|
| 1<br>2<br>3<br>4<br>5<br>6<br>7                                      | Health systems (16)                  | <b>11</b><br>Amegah, Campbell, Cheng, Khader, Leyva, Salve, Sun, Wald*, Xu 2012, Xu 2014, Zuo  | <b>2</b><br>Alderman, Klinger*                                                               | <b>2</b><br>Liu, Youssouf       | <b>1</b><br>Sawatzky*   |                        |
| 8<br>9<br>10<br>11<br>12<br>13                                       | Mental Health (13)                   | <b>3</b><br>Gao 2019*, Khader, Zuo                                                             | <b>9</b><br>Alderman, Benevolenza, Fernandez*, Leyva, Nichols, Rataj, Stanke, Veenema, Vins* | <b>1</b><br>Reid                |                         |                        |
| 14<br>15<br>16<br>17<br>18<br>19                                     | Pregnancy and birth outcomes (11)    | <b>5</b><br>Carolan-Olah*, Kuehn*, Poursafa*, Khader, Zhang 2017*                              | <b>2</b><br>Alderman, Benevolenza                                                            | <b>3</b><br>Liu, Reid, Youssouf |                         | <b>1</b><br>Porpora*   |
| 20<br>21<br>22<br>23<br>24                                           | Nutritional (9)                      | <b>4</b><br>Amegah, Khader, Phalkey, Salve                                                     | <b>6</b><br>Berhane, Khader, Nichols, Phalkey, Stanke, Swynghedauw                           |                                 | <b>1</b><br>An*         | <b>1</b><br>Vilcins*   |
| 25<br>26<br>27<br>28<br>29                                           | Skin diseases and allergies (8)      | <b>7</b><br>Amegah, Augustin*, Nichols, Gao 2014, Swynghedauw, Xu 2012, Zuo                    |                                                                                              |                                 | <b>1</b><br>Huang*      |                        |
| 30<br>31<br>32<br>33<br>34<br>35                                     | Occupational health and injuries (6) | <b>6</b><br>Binazzi*, Bonafede*, Flouris*, Levi*, Varghese*, Wimalawans                        |                                                                                              |                                 |                         | <b>1</b><br>Wimalawans |
| 36<br>37<br>38<br>39<br>40<br>41<br>42<br>43<br>44<br>45<br>46<br>47 | Other (17)                           | <b>10</b><br>Bunker, Cheng, Kampe*, Nichols, Park*, Rifkin, Swynghedauw, Xu 2012, Xu 2014, Zuo | <b>6</b><br>Alderman, Benevolenza, Doocy, Rataj, Rifkin, Stanke                              | <b>1</b><br>Liu                 | <b>1</b><br>Zhang 2007* |                        |



# PRISMA 2009 Checklist

| Section/topic                      | #  | Checklist item                                                                                                                                                                                                                                                                                              | Reported on page # |
|------------------------------------|----|-------------------------------------------------------------------------------------------------------------------------------------------------------------------------------------------------------------------------------------------------------------------------------------------------------------|--------------------|
| <b>TITLE</b>                       |    |                                                                                                                                                                                                                                                                                                             |                    |
| Title                              | 1  | Identify the report as a systematic review, meta-analysis, or both.                                                                                                                                                                                                                                         | 1                  |
| <b>ABSTRACT</b>                    |    |                                                                                                                                                                                                                                                                                                             |                    |
| Structured summary                 | 2  | Provide a structured summary including, as applicable: background; objectives; data sources; study eligibility criteria, participants, and interventions; study appraisal and synthesis methods; results; limitations; conclusions and implications of key findings; systematic review registration number. | 1                  |
| <b>INTRODUCTION</b>                |    |                                                                                                                                                                                                                                                                                                             |                    |
| Rationale                          | 3  | Describe the rationale for the review in the context of what is already known.                                                                                                                                                                                                                              | 2                  |
| Objectives                         | 4  | Provide an explicit statement of questions being addressed with reference to participants, interventions, comparisons, outcomes, and study design (PICOS).                                                                                                                                                  | 2                  |
| <b>METHODS</b>                     |    |                                                                                                                                                                                                                                                                                                             |                    |
| Protocol and registration          | 5  | Indicate if a review protocol exists, if and where it can be accessed (e.g., Web address), and, if available, provide registration information including registration number.                                                                                                                               | 3                  |
| Eligibility criteria               | 6  | Specify study characteristics (e.g., PICOS, length of follow-up) and report characteristics (e.g., years considered, language, publication status) used as criteria for eligibility, giving rationale.                                                                                                      | 3                  |
| Information sources                | 7  | Describe all information sources (e.g., databases with dates of coverage, contact with study authors to identify additional studies) in the search and date last searched.                                                                                                                                  | 3                  |
| Search                             | 8  | Present full electronic search strategy for at least one database, including any limits used, such that it could be repeated.                                                                                                                                                                               | 31                 |
| Study selection                    | 9  | State the process for selecting studies (i.e., screening, eligibility, included in systematic review, and, if applicable, included in the meta-analysis).                                                                                                                                                   | 3,4                |
| Data collection process            | 10 | Describe method of data extraction from reports (e.g., piloted forms, independently, in duplicate) and any processes for obtaining and confirming data from investigators.                                                                                                                                  | 4                  |
| Data items                         | 11 | List and define all variables for which data were sought (e.g., PICOS, funding sources) and any assumptions and simplifications made.                                                                                                                                                                       | 4                  |
| Risk of bias in individual studies | 12 | Describe methods used for assessing risk of bias of individual studies (including specification of whether this was done at the study or outcome level), and how this information is to be used in any data synthesis.                                                                                      | 5                  |
| Summary measures                   | 13 | State the principal summary measures (e.g., risk ratio, difference in means).                                                                                                                                                                                                                               | 4                  |
| Synthesis of results               | 14 | Describe the methods of handling data and combining results of studies, if done, including measures of consistency (e.g., $I^2$ ) for each meta-analysis.                                                                                                                                                   | 4,5                |



# PRISMA 2009 Checklist

Page 1 of 2

| Section/topic                 | #  | Checklist item                                                                                                                                                                                           | Reported on page # |
|-------------------------------|----|----------------------------------------------------------------------------------------------------------------------------------------------------------------------------------------------------------|--------------------|
| Risk of bias across studies   | 15 | Specify any assessment of risk of bias that may affect the cumulative evidence (e.g., publication bias, selective reporting within studies).                                                             | 5, 53-56           |
| Additional analyses           | 16 | Describe methods of additional analyses (e.g., sensitivity or subgroup analyses, meta-regression), if done, indicating which were pre-specified.                                                         | NA                 |
| <b>RESULTS</b>                |    |                                                                                                                                                                                                          |                    |
| Study selection               | 17 | Give numbers of studies screened, assessed for eligibility, and included in the review, with reasons for exclusions at each stage, ideally with a flow diagram.                                          | 6                  |
| Study characteristics         | 18 | For each study, present characteristics for which data were extracted (e.g., study size, PICOS, follow-up period) and provide the citations.                                                             | 6-8                |
| Risk of bias within studies   | 19 | Present data on risk of bias of each study and, if available, any outcome level assessment (see item 12).                                                                                                | 8                  |
| Results of individual studies | 20 | For all outcomes considered (benefits or harms), present, for each study: (a) simple summary data for each intervention group (b) effect estimates and confidence intervals, ideally with a forest plot. | 38-52              |
| Synthesis of results          | 21 | Present results of each meta-analysis done, including confidence intervals and measures of consistency.                                                                                                  | 11-17              |
| Risk of bias across studies   | 22 | Present results of any assessment of risk of bias across studies (see Item 15).                                                                                                                          | 8,53-56            |
| Additional analysis           | 23 | Give results of additional analyses, if done (e.g., sensitivity or subgroup analyses, meta-regression [see Item 16]).                                                                                    | NA                 |
| <b>DISCUSSION</b>             |    |                                                                                                                                                                                                          |                    |
| Summary of evidence           | 24 | Summarize the main findings including the strength of evidence for each main outcome; consider their relevance to key groups (e.g., healthcare providers, users, and policy makers).                     | 17-18              |
| Limitations                   | 25 | Discuss limitations at study and outcome level (e.g., risk of bias), and at review-level (e.g., incomplete retrieval of identified research, reporting bias).                                            | 19                 |
| Conclusions                   | 26 | Provide a general interpretation of the results in the context of other evidence, and implications for future research.                                                                                  | 19                 |
| <b>FUNDING</b>                |    |                                                                                                                                                                                                          |                    |
| Funding                       | 27 | Describe sources of funding for the systematic review and other support (e.g., supply of data); role of funders for the systematic review.                                                               | 21                 |

From: Moher D, Liberati A, Tetzlaff J, Altman DG, The PRISMA Group (2009). Preferred Reporting Items for Systematic Reviews and Meta-Analyses: The PRISMA Statement. PLoS Med 6(6): e1000097. doi:10.1371/journal.pmed1000097

For more information, visit: [www.prisma-statement.org](http://www.prisma-statement.org).

Page 2 of 2

For peer review only - <http://bmjopen.bmj.com/site/about/guidelines.xhtml>
