# Supplementary material for: Health effects of climate change: an overview of systematic reviews
Source: PubMed Central journal article supplement — BMJ Open. 2021 Jun 9;11(6):e046333. doi: 10.1136/bmjopen-2020-046333 (PMC8191619; doi:10.1136/bmjopen-2020-046333), 2021-06-09
Supplement: bmjopen-2020-046333supp001.pdf [file bmjopen-2020-046333supp001.pdf]

## Appendix 1. Search Strategy

Database: **MEDLINE (OVID)**

No database limit

| Concepts                                     | #  | Search strategy                                                 |
|----------------------------------------------|----|-----------------------------------------------------------------|
| Global Warming                               | 1  | exp Climate Change/                                             |
|                                              | 2  | "Global warming".ti,ab,kw                                       |
|                                              | 3  | "Climate Change?".ti,ab,kw                                      |
| Global Warming combined                      | 4  | or/1-3                                                          |
| Systematic review and meta-analysis          | 5  | exp Meta-Analysis as Topic/                                     |
|                                              | 6  | "Meta-Analysis"/                                                |
|                                              | 7  | Meta-Analysis.ti,ab,kw                                          |
|                                              | 8  | "meta analy*".ti,ab,kw                                          |
|                                              | 9  | metaanaly*.ti,ab,kw                                             |
|                                              | 10 | "Systematic Review"/                                            |
|                                              | 11 | "Systematic Reviews as Topic"/                                  |
|                                              | 12 | (systematic adj2 review).ti,ab,kw                               |
|                                              | 13 | (review adj1 ("selection criteria" OR "data extraction")).ti,ab |
| Systematic review and meta-analysis combined | 14 | or/5-13                                                         |
| Combination of concepts                      | 15 | 4 AND 14                                                        |

Database: **Embase.com**

No database limit

| Concepts                                     | #  | Search strategy                                                   |
|----------------------------------------------|----|-------------------------------------------------------------------|
| Global Warming                               | 1  | 'climate change'/de                                               |
|                                              | 2  | 'greenhouse effect'/de                                            |
|                                              | 3  | "Global warming":ti,ab,kw                                         |
|                                              | 4  | "Climate Change*":ti,ab,kw                                        |
| Global Warming combined                      | 5  | #1 OR #2 OR #3 OR #4                                              |
| Systematic review and meta-analysis          | 6  | 'meta analysis'/exp                                               |
|                                              | 7  | 'meta analysis (topic)'/de                                        |
|                                              | 8  | Meta-Analysis:ti,ab,kw                                            |
|                                              | 9  | "meta analy*":ti,ab,kw                                            |
|                                              | 10 | metaanaly*:ti,ab,kw                                               |
|                                              | 11 | 'systematic review'/de                                            |
|                                              | 12 | (systematic NEAR/2 review):ti,ab,kw                               |
|                                              | 13 | (review NEAR/2 ("selection criteria" OR "data extraction")):ti,ab |
| Systematic review and meta-analysis combined | 14 | #7 OR #8 OR #9 OR #10 OR #11 OR #12 OR #13 OR #14                 |

|                         |    |                                                       |
|-------------------------|----|-------------------------------------------------------|
| Combination of concepts | 15 | #14 AND #5                                            |
| Embase database only    | 16 | AND [embase]/lim NOT ([embase]/lim AND [medline]/lim) |

Database: **Web of Science**

Limit to: Science Citation Index Expanded (SCI-EXPANDED) and Emerging Sources Citation Index (ESCI) index only

| Concepts                                     | # | Search strategy                                                |
|----------------------------------------------|---|----------------------------------------------------------------|
| Global Warming                               | 1 | TS=("Global warming" OR "Climate Change\$")                    |
| Systematic review and meta-analysis          | 2 | TS=(Meta-Analysis)                                             |
|                                              | 3 | TS=("meta analy*")                                             |
|                                              | 4 | TS=(metaanaly*)                                                |
|                                              | 5 | TS=(systematic NEAR/2 review)                                  |
|                                              | 6 | TS=(review NEAR/1 ("selection criteria" OR "data extraction")) |
| Systematic review and meta-analysis combined | 7 | #6 OR #5 OR #4 OR #3 OR #2                                     |
| Combination of concepts                      | 8 | #7 AND #1                                                      |

Database: **CINAHL**

No database limit

| Concepts       | # | Search strategy     |
|----------------|---|---------------------|
| Global Warming | 1 | MH "Climate Change" |

|                                     |    |                                                            |
|-------------------------------------|----|------------------------------------------------------------|
|                                     | 2  | MH "Greenhouse Effect"                                     |
|                                     | 3  | TI "Global warming"                                        |
|                                     | 4  | TI "Climate Change?"                                       |
|                                     | 5  | AB "Global warming"                                        |
|                                     | 6  | AB "Climate Change?"                                       |
| Global Warming combined             | 7  | S1 OR S2 OR S3 OR S4 OR S5 OR S6                           |
| Systematic review and meta-analysis | 8  | MH "Meta Analysis"                                         |
|                                     | 9  | TI "Meta-Analysis"                                         |
|                                     | 10 | AB "Meta-Analysis"                                         |
|                                     | 11 | TI "meta analy**"                                          |
|                                     | 12 | AB "meta analy**"                                          |
|                                     | 13 | TI metaanaly*                                              |
|                                     | 14 | AB metaanaly*                                              |
|                                     | 15 | MH "Systematic Review"                                     |
|                                     | 16 | TI (systematic N2 review)                                  |
|                                     | 17 | AB (systematic N2 review)                                  |
|                                     | 18 | TI (review N1 ("selection criteria" OR "data extraction")) |
|                                     | 19 | AB (review N1 ("selection criteria" OR "data extraction")) |

|                                              |    |                                                                                |
|----------------------------------------------|----|--------------------------------------------------------------------------------|
| Systematic review and meta-analysis combined | 20 | S8 OR S9 OR S10 OR S11 OR S12 OR S13 OR S14 OR S15 OR S16 OR S17 OR S18 OR S19 |
| Combination of concepts                      | 21 | S7 AND S20                                                                     |
