# Supplementary material for: Health effects of climate change: an overview of systematic reviews
Source: PubMed Central journal article supplement — BMJ Open. 2021 Jun 9;11(6):e046333. doi: 10.1136/bmjopen-2020-046333 (PMC8191619; doi:10.1136/bmjopen-2020-046333), 2021-06-09
Supplement: bmjopen-2020-046333supp003.pdf [file bmjopen-2020-046333supp003.pdf]

**Appendix 3.** Overview of included studies (N=94) according to study characteristics and summary of climate impacts on health outcomes. Studies are presented in alphabetical order according to the first author's last name.

|   | First Author | Year | Country       | Years of included publications | Years of the studies included in the reviews | # of articles | Meta-analysis | Specific Area of focus | Specific Population of interest | Climate Impact  | Health Outcome                                                                                                                                             | Summary of findings                                                                                                                                                                                                                                                     |
|---|--------------|------|---------------|--------------------------------|----------------------------------------------|---------------|---------------|------------------------|---------------------------------|-----------------|------------------------------------------------------------------------------------------------------------------------------------------------------------|-------------------------------------------------------------------------------------------------------------------------------------------------------------------------------------------------------------------------------------------------------------------------|
| 1 | Alderman     | 2012 | Australia     | 2004-2011                      | 1931-2007                                    | 35            | No            |                        |                                 | Extreme weather | Infectious diseases<br>Mortality<br>Health systems<br>Mental health<br>Pregnancy and birth<br>Other                                                        | Floods are associated with infectious diseases (water- and vector-borne diseases), mortality (e.g., drowning), exacerbation of chronic illnesses, mental health issues (e.g., PTSD), hospital admissions, pregnancy outcomes and injuries.                              |
| 2 | Amegah       | 2016 | Ghana         | 1995-2014                      | 1960-2010                                    | 23            | No            | Sub-saharan Africa     |                                 | Meteorological  | Infectious diseases<br>Mortality<br>Respiratory, cardiovascular, and neurological outcomes<br>Health systems<br>Nutritional<br>Skin diseases and allergies | Temperature and temperature variability are suggested to be associated with infectious diseases, such as Ebola, cardiovascular diseases, mortality, cholera outbreaks, meningitis, undernutrition in children, respiratory outcomes, such as asthma, and skin diseases. |
| 3 | An           | 2018 | United States | 2002-2017                      | 2002-2016                                    | 50            | No            |                        |                                 | General         | Nutritional                                                                                                                                                | Climate change is associated with obesity. This association can be explained in 4 ways, such that climate change may impact obesity, obesity may impact climate change, both factors may be associated with common causes, or both factors may influence each other.    |

|    |             |      |               |           |           |     |     |          |                        |                                   |                                               |                                                                                                                                                                                                                       |
|----|-------------|------|---------------|-----------|-----------|-----|-----|----------|------------------------|-----------------------------------|-----------------------------------------------|-----------------------------------------------------------------------------------------------------------------------------------------------------------------------------------------------------------------------|
| 4  | Augustin    | 2008 | Germany       | 1996-2006 | NS        | 320 | No  | Germany  |                        | Meteorological                    | Skin diseases and allergies                   | Although skin and allergic diseases are climate sensitive, there is not sufficient evidence to suggest a prediction concerning skin and allergic diseases linked to climate change in Germany.                        |
| 5  | Babaie      | 2018 | Iran          | 2007-2017 | 1970-2015 | 14  | No  | Iran     |                        | Meteorological                    | Infectious diseases                           | Temperature, precipitation and humidity are associated with the risk of transmission of Malaria.                                                                                                                      |
| 6  | Bai         | 2013 | China         | 1995-2011 | 1951-2010 | 57  | No  | China    |                        | Meteorological                    | Infectious diseases                           | Variability in temperature, precipitation and wind are associated with the risk of transmission of mosquito-borne diseases.                                                                                           |
| 7  | Benevolenza | 2019 | United States | 2006-2017 | 2005-2015 | 13  | No  |          | Vulnerable populations | Extreme weather                   | Mental health<br>Pregnancy and birth<br>Other | Extreme weather events are associated with an exacerbation of pre-existing chronic health conditions, mental health issues (e.g., PTSD, isolation) and adverse birth outcomes.                                        |
| 8  | Berhane     | 2016 | Ethiopia      | NS        | NS        | 23  | No  | Ethiopia |                        | Meteorological<br>Extreme weather | Infectious diseases<br>Nutritional            | Meteorological factors and extreme weather events are associated with under- and mal- nutrition and the increased risk of climate sensitive infectious diseases (e.g., malaria, diarrhea, zoonotic infections, etc.). |
| 9  | Bernhardt   | 2019 | Germany       | 1997-2017 | NS        | 464 | No  |          |                        | Meteorological                    | Infectious diseases                           | Rising temperatures are predicted to be associated with myiasis in the future.                                                                                                                                        |
| 10 | Binazzi     | 2019 | Italy         | NS        | 1994-2013 | 8   | Yes |          | Workers                | Meteorological                    | Occupational health and injuries              | High temperatures are positively associated with occupational injuries.                                                                                                                                               |
| 11 | Bonafede    | 2016 | Italy         | 2000-2014 | 1985-2010 | 8   | No  |          | Workers                | Meteorological                    | Occupational health and injuries              | Extreme temperature (particularly heat) is associated with occupational injuries.                                                                                                                                     |

|    |              |      |                |           |           |     |     |        |                           |                 |                                                                                                                       |                                                                                                                                                                                                                |
|----|--------------|------|----------------|-----------|-----------|-----|-----|--------|---------------------------|-----------------|-----------------------------------------------------------------------------------------------------------------------|----------------------------------------------------------------------------------------------------------------------------------------------------------------------------------------------------------------|
| 12 | Brown        | 2013 | United Kingdom | 2004-2012 | 1975-2012 | 38  | No  | Europe |                           | Extreme weather | Infectious diseases                                                                                                   | Floods are associated with infectious diseases, including water-, rodent- and vector-borne diseases (from weeks to months after flooding).                                                                     |
| 13 | Bunker       | 2016 | Germany        | 1995-2015 | 1974-2013 | 61  | Yes |        | Elderly                   | Meteorological  | Mortality<br>Respiratory, cardiovascular, and neurological outcomes<br>Other                                          | Higher and lower temperatures are associated with cardiovascular and respiratory morbidity and mortality. Heat is also associated with diabetes and genitourinary infections.                                  |
| 14 | Campbell     | 2018 | Australia      | 1964-2017 | NS        | 188 | No  |        |                           | Meteorological  | Mortality<br>Health systems                                                                                           | Most studies exploring the heat impacts on health focus on mortality outcomes, followed by hospital admissions and ambulance call outs.                                                                        |
| 15 | Cann         | 2013 | United Kingdom | 1973-2010 | NS        | 83  | No  |        |                           | Extreme weather | Infectious diseases                                                                                                   | Extreme water-related events are associated with outbreaks of water-related infectious diseases.                                                                                                               |
| 16 | Carolan-Olah | 2014 | Australia      | 1997-2012 | 1988-2009 | 7   | No  |        |                           | Meteorological  | Pregnancy and birth                                                                                                   | High temperatures are associated with preterm birth.                                                                                                                                                           |
| 17 | Cheng        | 2014 | China          | 1990-2013 | 1941-2012 | 25  | No  |        | Adults, Elderly, Children | Meteorological  | Infectious diseases<br>Mortality<br>Respiratory, cardiovascular, and neurological outcomes<br>Health systems<br>Other | Diurnal temperature range is associated with mortality and cardiovascular and respiratory outcomes, hospital admissions, and Hand Foot Mouth disease in children and genitourinary outcomes among the elderly. |
| 18 | Coates       | 2019 | Denmark        | 2003-2018 | NS        | 72  | No  |        |                           | Meteorological  | Infectious diseases                                                                                                   | Some meteorological factors (temperature, humidity) are positively associated with Hand Foot Mouth disease (HFMD). Precipitation, wind speed and sunshine are not associated with HFMD.                        |

|    |           |      |               |           |           |     |     |                         |  |                 |                                                                               |                                                                                                                                                                                                                                                                    |
|----|-----------|------|---------------|-----------|-----------|-----|-----|-------------------------|--|-----------------|-------------------------------------------------------------------------------|--------------------------------------------------------------------------------------------------------------------------------------------------------------------------------------------------------------------------------------------------------------------|
| 19 | Cong      | 2017 | China         | 1994-2015 | 1982-2013 | 26  | Yes |                         |  | Meteorological  | Respiratory, cardiovascular, and neurological outcomes                        | Temperature drop is associated with asthma.                                                                                                                                                                                                                        |
| 20 | Cunrui    | 2011 | Australia     | 1997-2010 | 1961-2100 | 14  | No  |                         |  | Meteorological  | Mortality                                                                     | Higher temperature is associated with heat-related mortality.                                                                                                                                                                                                      |
| 21 | deSousa   | 2018 | Brazil        | 1976-2016 | NS        | 106 | No  |                         |  | Meteorological  | Infectious diseases<br>Respiratory, cardiovascular, and neurological outcomes | Meteorological factors (e.g., temperature, precipitation) are associated with infectious diseases (e.g., dengue, malaria) and cardiovascular and respiratory outcomes.                                                                                             |
| 22 | Dhimal    | 2015 | Nepal         | 1956-2014 | 1948-2098 | 50  | No  | Nepal                   |  | Meteorological  | Infectious diseases                                                           | Higher temperatures are associated with the distribution of vector-borne diseases.                                                                                                                                                                                 |
| 23 | Doocy     | 2013 | United States | 1975-2011 | 1974-2008 | 60  | No  |                         |  | Extreme weather | Mortality<br>Other                                                            | Cyclones are associated with mortality (e.g., drowning) and injuries.                                                                                                                                                                                              |
| 24 | Duan      | 2019 | China         | 2010-2018 | 2000-2016 | 51  | Yes | Southeast and East Asia |  | Meteorological  | Infectious diseases                                                           | Some meteorological factors (mean maximum temperature, rainfall, humidity and sunshine) are positively associated with Hand Foot Mouth disease (HFMD), whereas air pressure is negatively associated with this disease and wind speed is not associated with HFMD. |
| 25 | Fan       | 2015 | China         | 2004-2013 | 1985-2012 | 33  | Yes |                         |  | Meteorological  | Infectious diseases                                                           | Temperature is positively associated with transmission and incidence of Dengue.                                                                                                                                                                                    |
| 26 | Fernandez | 2015 | Australia     | 1995-2014 | NS        | 83  | No  |                         |  | Extreme weather | Mental health                                                                 | Floods are associated with negative mental health outcomes (e.g., PTSD, increased anxiety, depression, use of psychotropic medication). Conflicting evidence concerning suicide,                                                                                   |

|    |            |      |                |           |           |     |     |        |          |                |                                                                                                              |                                                                                                                                                                                 |
|----|------------|------|----------------|-----------|-----------|-----|-----|--------|----------|----------------|--------------------------------------------------------------------------------------------------------------|---------------------------------------------------------------------------------------------------------------------------------------------------------------------------------|
|    |            |      |                |           |           |     |     |        |          |                |                                                                                                              | tobacco, alcohol and substance abuse.                                                                                                                                           |
| 27 | Flouris    | 2018 | Greece         | 1954-2018 | NS        | 111 | Yes |        | Workers  | Meteorological | Occupational health and injuries                                                                             | High temperatures are positively associated with occupational heat strains, dehydration, kidney diseases and injuries.                                                          |
| 28 | Gao        | 2019 | China          | 1994-2018 | 1969-2015 | 16  | Yes |        |          | Meteorological | Mental health                                                                                                | Temperature increase is associated with suicide. No association between sunlight duration and suicide.                                                                          |
| 29 | Gao        | 2014 | China          | 1996-2012 | 1971-2010 | 37  | No  |        | Children | Meteorological | Infectious diseases<br>Respiratory, cardiovascular, and neurological outcomes<br>Skin diseases and allergies | Ambient humidity is associated with gastrointestinal, respiratory and allergic diseases in children.                                                                            |
| 30 | Ghanizadeh | 2017 | Iran           | 2009-2016 | 1990-2015 | 13  | No  |        |          | Meteorological | Mortality<br>Respiratory, cardiovascular, and neurological outcomes                                          | Meteorological factors, such as temperature and humidity, are associated with cardiopulmonary health. Cold temperatures are also associated with mortality from heart diseases. |
| 31 | Ghazani    | 2018 | Australia      | 2006-2017 | 1991-2011 | 11  | No  |        |          | Meteorological | Infectious diseases                                                                                          | Higher temperature is associated with bacterial gastrointestinal infections. Humidity and rainfall may influence this association.                                              |
| 32 | Gracia     | 2015 | Sweden         | 2003-2011 | 1959-2008 | 9   | No  | Europe |          | Meteorological | Infectious diseases                                                                                          | Temperature is positively associated with Human Puumala Hantavirus in some regions of Europe. Results concerning precipitation and humidity are contradictory or null.          |
| 33 | Hajat      | 2010 | United Kingdom | 1994-2008 | 1973-2003 | 11  | No  |        |          | Meteorological | Mortality                                                                                                    | Ambient heat is associated with mortality.                                                                                                                                      |

|    |         |      |                |           |           |    |     |                       |                        |                                                  |                                                                                                                                                                     |                                                                                                                                                                                                                                                                                                                                                                                                                                                                                                 |
|----|---------|------|----------------|-----------|-----------|----|-----|-----------------------|------------------------|--------------------------------------------------|---------------------------------------------------------------------------------------------------------------------------------------------------------------------|-------------------------------------------------------------------------------------------------------------------------------------------------------------------------------------------------------------------------------------------------------------------------------------------------------------------------------------------------------------------------------------------------------------------------------------------------------------------------------------------------|
| 34 | Hedlund | 2014 | Sweden         | 1970-2012 | 1750-2009 | 29 | No  | Arctic, sub-Arctic    | Vulnerable populations | Meteorological<br>Extreme weather                | Infectious diseases                                                                                                                                                 | Higher temperatures and flooding are associated with food- and water-borne diseases. This association is weaker for vector- and rodent-borne diseases. Air temperature and humidity seem to be associated with air-borne diseases.                                                                                                                                                                                                                                                              |
| 35 | Hii     | 2016 | Sweden         | 2007-2015 | 2003-2012 | 9  | No  | Malaysia              |                        | Meteorological                                   | Infectious diseases                                                                                                                                                 | Some meteorological factors (temperature, rainfall and humidity) are associated with Dengue, although these associations are inconsistent at times.                                                                                                                                                                                                                                                                                                                                             |
| 36 | Huang   | 2016 | Taiwan         | 1990-2014 | 1978-2011 | 19 | Yes |                       |                        | General                                          | Skin diseases and allergies                                                                                                                                         | Climate change, in general, may be associated with skin and soft-tissue infections.                                                                                                                                                                                                                                                                                                                                                                                                             |
| 37 | Kampe   | 2016 | United Kingdom | 1998-2015 | 1971-2010 | 13 | No  | High-income countries |                        | Meteorological                                   | Other                                                                                                                                                               | Higher temperature is associated with unintentional injuries.                                                                                                                                                                                                                                                                                                                                                                                                                                   |
| 38 | Khader  | 2015 | Jordan         | 2003-2014 | 1991-2012 | 78 | No  | Eastern Mediterranean | Vulnerable countries   | Meteorological<br>Extreme weather<br>Air quality | Infectious diseases<br>Mortality<br>Respiratory, cardiovascular, and neurological outcomes<br>Health systems<br>Mental health<br>Pregnancy and birth<br>Nutritional | High temperature is associated with mortality. Temperature, humidity and precipitation are associated with vector-, food- and water-borne diseases. Air pollution is associated with respiratory outcomes, although some findings are inconsistent. Higher temperature is associated with mental health outcomes and hospital admissions. Higher temperature may also be associated with adverse birth outcomes. Meteorological and extreme weather events are associated with food insecurity. |
| 39 | Klinger | 2014 | United Kingdom | 2011-2013 | NS        | 20 | No  |                       |                        | Extreme weather                                  | Health systems                                                                                                                                                      | Extreme weather events may lead to power outages which may pose challenges to healthcare quality.                                                                                                                                                                                                                                                                                                                                                                                               |

|    |        |      |                |           |           |     |     |             |                 |                                                  |                                                                      |                                                                                                                                                                                                                                 |
|----|--------|------|----------------|-----------|-----------|-----|-----|-------------|-----------------|--------------------------------------------------|----------------------------------------------------------------------|---------------------------------------------------------------------------------------------------------------------------------------------------------------------------------------------------------------------------------|
| 40 | Kuehn  | 2017 | United States  | 2002-2017 | NS        | 28  | No  |             | Pregnant people | Meteorological                                   | Pregnancy and birth                                                  | Extreme heat exposure is associated with adverse birth outcomes (e.g. stillbirth, birth weight).                                                                                                                                |
| 41 | Lake   | 2017 | United Kingdom | NS        | NS        | 66  | No  | Europe      |                 | General                                          | Respiratory, cardiovascular, and neurological outcomes               | Climate change may be associated with ragweed pollen allergy.                                                                                                                                                                   |
| 42 | Lal    | 2019 | Australia      | 1982-2011 | NS        | 36  | Yes |             | Children        | Meteorological                                   | Infectious diseases                                                  | Rainfall is associated with childhood diarrhea, although this association differed according to season and latitude.                                                                                                            |
| 43 | Lal    | 2015 | Australia      | NS        | NS        | 16  | No  | New Zealand |                 | Meteorological                                   | Infectious diseases                                                  | Temperature variability, higher temperature and rainfall are associated with enteric diseases.                                                                                                                                  |
| 44 | Lawton | 2019 | Australia      | 2000-2015 | NS        | 71  | No  |             |                 | Meteorological                                   | Mortality<br>Respiratory, cardiovascular, and neurological outcomes  | Heat exposure is associated with heat stroke, long-term neurological outcomes (e.g., cerebellar injury) and heat-related mortality.                                                                                             |
| 45 | Levi   | 2018 | Italy          | 2003-2017 | 1977-2014 | 184 | No  |             | Workers         | Meteorological                                   | Occupational health and injuries                                     | Heat exposure is associated with occupational injuries.                                                                                                                                                                         |
| 46 | Levy   | 2016 | United States  | 1972-2013 | 1948-2010 | 208 | No  |             |                 | Meteorological<br>Extreme weather                | Infectious diseases                                                  | Temperature is associated with bacterial diarrhea and drought is associated with all-cause diarrhea, although few studies explored the association between drought and diarrhea.                                                |
| 47 | Leyva  | 2017 | Asia           | 2009-2017 | NS        | 30  | No  |             | Elderly         | Meteorological<br>Extreme weather<br>Air quality | Infectious diseases<br>Mortality<br>Respiratory, cardiovascular, and | Meteorological factors, extreme weather events (e.g. typhoon, floods) and air pollution are associated with mortality and morbidity, especially cardiovascular- and respiratory-specific. Higher temperature is associated with |

|    |            |      |               |           |           |    |     |                             |  |                                   |                                                                                                                       |                                                                                                                                                                                                                                                                                 |
|----|------------|------|---------------|-----------|-----------|----|-----|-----------------------------|--|-----------------------------------|-----------------------------------------------------------------------------------------------------------------------|---------------------------------------------------------------------------------------------------------------------------------------------------------------------------------------------------------------------------------------------------------------------------------|
|    |            |      |               |           |           |    |     |                             |  |                                   | neurological outcomes<br>Health systems<br>Mental health                                                              | vector-borne diseases. Heat and cold temperatures are associated with hospital admissions. Flooding is associated with mental health outcomes (e.g. PTSD, depression).                                                                                                          |
| 48 | Li         | 2018 | China         | 1988-2017 | NS        | 81 | No  | China                       |  | Meteorological<br>Extreme weather | Infectious diseases                                                                                                   | Meteorological factors (temperature, precipitation, humidity, air pressure) and extreme weather events (floods, typhoons) are associated with Dengue fever in China.                                                                                                            |
| 49 | Lian       | 2015 | China         | 2003-2014 | NS        | 20 | Yes |                             |  | Meteorological                    | Mortality<br>Respiratory, cardiovascular, and neurological outcomes                                                   | Higher and lower temperatures are associated with stroke-related mortality and low temperatures are also associated with stroke-related morbidities.                                                                                                                            |
| 50 | Liu        | 2015 | United States | 1990-2014 | NS        | 61 | No  |                             |  | Air quality                       | Mortality<br>Respiratory, cardiovascular, and neurological outcomes<br>Health systems<br>Pregnancy and birth<br>Other | Wildfire smoke exposure is associated with mortality, respiratory outcomes and hospital admissions. Wildfire smoke exposure could also be associated with cardiovascular, ophthalmic and pregnancy outcomes, although more research is needed.                                  |
| 51 | Madaniyazi | 2015 | Australia     | 2004-2013 | 1961-2100 | 15 | No  |                             |  | Air quality                       | Mortality                                                                                                             | Air pollution is associated with future mortality.                                                                                                                                                                                                                              |
| 52 | Matysiak   | 2017 | Puerto Rico   | 2001-2005 | NS        | 26 | No  | Puerto Rico (United States) |  | Meteorological<br>Extreme weather | Infectious diseases                                                                                                   | Meteorological factors (higher temperature and increased rainfall) are associated with vector-borne diseases, such as Dengue and Zika. Extreme weather events are less researched, but the few studies investigating this association suggest no association between hurricanes |



|    |              |      |                |           |           |    |     |                                |                   |                                                  |                                                                                                                                                                    |                                                                                                                                                                                                                                                                                                                                                                                            |
|----|--------------|------|----------------|-----------|-----------|----|-----|--------------------------------|-------------------|--------------------------------------------------|--------------------------------------------------------------------------------------------------------------------------------------------------------------------|--------------------------------------------------------------------------------------------------------------------------------------------------------------------------------------------------------------------------------------------------------------------------------------------------------------------------------------------------------------------------------------------|
|    |              |      |                |           |           |    |     |                                |                   |                                                  |                                                                                                                                                                    | and floods and vector-borne diseases.                                                                                                                                                                                                                                                                                                                                                      |
| 53 | Moghaddamnia | 2017 | Iran           | 2011-2016 | 1979-2013 | 26 | Yes |                                |                   | Meteorological                                   | Mortality                                                                                                                                                          | Higher and lower temperature are associated with cardiovascular mortality.                                                                                                                                                                                                                                                                                                                 |
| 54 | Naish        | 2014 | Australia      | NS        | 1931-2010 | 16 | No  |                                |                   | Meteorological                                   | Infectious diseases                                                                                                                                                | Meteorological factors (especially temperature, rainfall and humidity) are associated with Dengue.                                                                                                                                                                                                                                                                                         |
| 55 | Nichols      | 2009 | United Kingdom | 1999-2008 | NS        | 36 | No  |                                |                   | Meteorological<br>Extreme weather<br>Air quality | Infectious diseases<br>Mortality<br>Respiratory, cardiovascular, and neurological outcomes<br>Mental health<br>Nutritional<br>Skin diseases and allergies<br>Other | Meteorological factors (e.g., higher temperature) are associated with mortality and various infectious diseases. Increased UV exposure is associated with skin cancer and cataracts. Extreme weather events are associated with mortality, injury, mental health outcomes, malnutrition, and food- and water-borne diseases. Air pollution is associated with cardio-respiratory outcomes. |
| 56 | Odame        | 2018 | United States  | 2006-2017 | 1893-2013 | 14 | Yes |                                | Rural populations | Meteorological                                   | Mortality                                                                                                                                                          | Higher temperature is associated with all-cause mortality and cardiovascular specific mortality.                                                                                                                                                                                                                                                                                           |
| 57 | Park         | 2017 | Korea          | 1920-2015 | 1961-2013 | 10 | Yes |                                |                   | Meteorological                                   | Other                                                                                                                                                              | Higher temperature is associated with acute gouty arthritis.                                                                                                                                                                                                                                                                                                                               |
| 58 | Phalkey      | 2015 | Germany        | 1989-2012 | 1982-2008 | 15 | No  | Low to middle-income countries | Children          | Meteorological<br>Extreme weather                | Nutritional                                                                                                                                                        | Meteorological factors (rainfall, temperature) and extreme weather events are associated with childhood undernutrition.                                                                                                                                                                                                                                                                    |
| 59 | Philipsborn  | 2016 | Georgia        | NS        | 1973-2010 | 28 | Yes |                                |                   | Meteorological                                   | Infectious diseases                                                                                                                                                | Higher temperature is associated with Diarrheagenic Escherichia coli. No significant relationship between rainfall and E. coli.                                                                                                                                                                                                                                                            |
| 60 | Phung        | 2015 | Australia      | 2004-2013 | NS        | 13 | No  | Southeast Asia                 |                   | Meteorological                                   | Infectious diseases                                                                                                                                                | Meteorological factors (temperature, humidity) and extreme weather                                                                                                                                                                                                                                                                                                                         |

|    |          |      |               |           |           |    |    |                                |                         |                                   |                                                                                                             |                                                                                                                                                                                                                              |
|----|----------|------|---------------|-----------|-----------|----|----|--------------------------------|-------------------------|-----------------------------------|-------------------------------------------------------------------------------------------------------------|------------------------------------------------------------------------------------------------------------------------------------------------------------------------------------------------------------------------------|
|    |          |      |               |           |           |    |    |                                |                         | Extreme weather                   |                                                                                                             | events (flooding) are associated with vector- and water-borne infectious diseases.                                                                                                                                           |
| 61 | Porpora  | 2019 | Italy         | 1964-2019 | NS        | 78 | No |                                |                         | Other                             | Pregnancy and birth                                                                                         | Environmental pollutants may be associated with preterm birth, however this association remains unclear due to conflicting evidence.                                                                                         |
| 62 | Poursafa | 2015 | Iran          | 2001-2013 | NS        | 15 | No |                                |                         | Meteorological                    | Pregnancy and birth                                                                                         | Meteorological factors (higher temperature, lower temperature, humidity, sunlight intensity) are associated with adverse birth outcomes (low birth weight, preterm birth, hypertension, eclampsia).                          |
| 63 | Racloz   | 2012 | Australia     | NS        | NS        | 63 | No |                                |                         | Meteorological                    | Infectious diseases                                                                                         | Higher temperature, increased precipitation and humidity are associated with Dengue.                                                                                                                                         |
| 64 | Rataj    | 2016 | Germany       | 1981-2012 | 1978-2008 | 17 | No | Low to middle income countries |                         | Extreme weather                   | Mental health<br>Other                                                                                      | Extreme weather events are associated with mental health outcomes (e.g., PTSD, anxiety, depression) and injuries.                                                                                                            |
| 65 | Reid     | 2016 | United States | 1990-2015 | NS        | 53 | No |                                | Susceptible populations | Air quality                       | Mortality<br>Respiratory, cardiovascular, and neurological outcomes<br>Mental health<br>Pregnancy and birth | Wildfire smoke exposure is associated with respiratory outcomes (e.g., asthma) and mortality. Wildfire smoke exposure may be associated with cardiovascular, birth, and mental health outcomes, but more research is needed. |
| 66 | Rifkin   | 2018 | United States | 1995-2017 | 1992-2016 | 16 | No |                                |                         | Meteorological<br>Extreme weather | Other                                                                                                       | Temperature and extreme weather events (hurricanes) are associated with sleep quality.                                                                                                                                       |
| 67 | Salve    | 2018 | India         | NS        | NS        | 11 | No | India                          |                         | Meteorological                    | Mortality<br>Health systems<br>Nutritional                                                                  | Increase in temperature is associated with all-cause mortality, cause-specific mortality (e.g., myocardial                                                                                                                   |

|    |            |      |                |           |                         |            |     |                      |  |                 |                                                                                                                                     |                                                                                                                                                                                            |
|----|------------|------|----------------|-----------|-------------------------|------------|-----|----------------------|--|-----------------|-------------------------------------------------------------------------------------------------------------------------------------|--------------------------------------------------------------------------------------------------------------------------------------------------------------------------------------------|
|    |            |      |                |           |                         |            |     |                      |  |                 |                                                                                                                                     | infarctions, stroke, heart diseases), hospitalizations (e.g., heat-related admissions, neonatal intensive unit admissions), and food insecurity and malnutrition, via agricultural issues. |
| 68 | Sanderson  | 2017 | United Kingdom | 1988-2017 | 1900-2101               | 63         | No  |                      |  | Meteorological  | Mortality                                                                                                                           | Higher temperatures and heat waves are associated with mortality and heat-related mortality is likely to increase with increased temperatures.                                             |
| 69 | Sawatzky   | 2018 | Canada         | 2005-2016 | NS                      | 85         | No  | Arctic and Subarctic |  | General         | Health systems                                                                                                                      | Climate change, in general, is associated with a strain in public health resources, via population health issues and surveillance systems may guide future adaptation to climate change.   |
| 70 | Semenza    | 2012 | Sweden         | 1998-2009 | 1995-2007               | 722        | No  |                      |  | Meteorological  | Infectious diseases                                                                                                                 | Meteorological factors (temperature, rainfall) are associated with some food- and water-borne diseases.                                                                                    |
| 71 | Stanke     | 2013 | United Kingdom | 1967-2011 | 1876-1879 and 1961-2010 | 87         | No  |                      |  | Extreme weather | Infectious diseases<br>Mortality<br>Respiratory, cardiovascular, and neurological outcomes<br>Mental health<br>Nutritional<br>Other | Droughts are associated with malnutrition, mortality, infectious diseases, cardiovascular and respiratory outcomes, mental health (e.g., increased worry, anxiety), injuries, and cancer.  |
| 72 | Stensgaard | 2019 | Denmark        | 1995-2017 | NS                      | 20         | No  |                      |  | Meteorological  | Infectious diseases                                                                                                                 | Meteorological factors (temperature, precipitation, humidity) are associated with schistosomiasis and increasing temperatures are likely to affect the geographic range of this parasite.  |
| 73 | Sun        | 2018 | China          | 1999-2017 | 1974-2014               | 30(review) | Yes |                      |  | Meteorological  | Mortality                                                                                                                           | Heat and cold exposure are associated with myocardial                                                                                                                                      |

|    |                 |      |                  |               |               |                                    |    |                |          |                                           |                                                                                      |                                                                                                                                                                                                                                                                                                                                                                                                                      |
|----|-----------------|------|------------------|---------------|---------------|------------------------------------|----|----------------|----------|-------------------------------------------|--------------------------------------------------------------------------------------|----------------------------------------------------------------------------------------------------------------------------------------------------------------------------------------------------------------------------------------------------------------------------------------------------------------------------------------------------------------------------------------------------------------------|
|    |                 |      |                  |               |               | w)2<br>3m<br>eta-<br>anal-<br>ysis |    |                |          |                                           | Respiratory,<br>cardiovascular,<br>and<br>neurological<br>outcomes<br>Health systems | infarctions (MI) and hospitalization<br>for MI. Heat exposure is associated<br>with MI-specific mortality.                                                                                                                                                                                                                                                                                                           |
| 74 | Swynghed<br>auw | 2009 | France           | NS            | NS            | NS                                 | No |                |          | Meteorolo-<br>gical<br>Extreme<br>weather | Infectious<br>diseases<br>Mortality<br>Skin diseases<br>and allergies<br>Other       | Heat and cold exposure are<br>associated with mortality and more<br>specifically, respiratory- and<br>cardiovascular-specific mortality.<br>Exposure to UV is associated with<br>skin cancer and cataracts. Higher<br>temperatures are associated with<br>infectious diseases (mosquito- and<br>food-borne diseases) and extreme<br>weather events are associated with<br>undernutrition and food-borne<br>diseases. |
| 75 | Tall            | 2014 | Australi-<br>a   | 1946-<br>2009 | 1886-<br>2006 | 22                                 | No | Australi-<br>a |          | Extreme<br>weather                        | Infectious<br>diseases                                                               | There is no strong evidence for the<br>association between flooding and<br>the Ross River Virus.                                                                                                                                                                                                                                                                                                                     |
| 76 | Varghese        | 2018 | Australi-<br>a   | 1983-<br>2017 | 1922-<br>2017 | 26                                 | No |                | Workers  | Meteorolo-<br>gical                       | Occupational<br>health and<br>injuries                                               | Heat is associated with occupational<br>injuries in many contexts of work<br>(e.g., agriculture, transport,<br>construction, fishing).                                                                                                                                                                                                                                                                               |
| 77 | Veenema         | 2017 | United<br>States | 2006-<br>2016 | NS            | 47                                 | No |                |          | Extreme<br>weather                        | Infectious<br>diseases<br>Mortality<br>Mental health                                 | Extreme water-related weather<br>events are associated with<br>mortality, water- and vector-borne<br>infectious diseases, mental health<br>issues (e.g., PTSD, depression,<br>anxiety).                                                                                                                                                                                                                              |
| 78 | Vilcins         | 2018 | Australi-<br>a   | NS            | NS            | 72                                 | No |                | Children | Other                                     | Nutritional                                                                          | Certain environmental risk factors<br>(e.g., sanitation, cooking fuels),<br>which could be aggravated by<br>climate change, may be associated<br>with childhood stunting.                                                                                                                                                                                                                                            |
| 79 | Vins            | 2015 | United<br>States | 1995-<br>2005 | NS            | 82                                 | No |                |          | Extreme<br>weather                        | Mental health                                                                        | Drought is likely associated with<br>adverse mental health outcomes.                                                                                                                                                                                                                                                                                                                                                 |

|    |             |      |               |           |           |    |     |                    |                               |                         |                                                                                                              |                                                                                                                                                                                                                                                                                                               |
|----|-------------|------|---------------|-----------|-----------|----|-----|--------------------|-------------------------------|-------------------------|--------------------------------------------------------------------------------------------------------------|---------------------------------------------------------------------------------------------------------------------------------------------------------------------------------------------------------------------------------------------------------------------------------------------------------------|
| 80 | Waits       | 2018 | Finland       | 1970-2017 | NS        | 43 | No  | Arctic             |                               | Meteorological          | Infectious diseases                                                                                          | Meteorological factors (especially higher temperature and precipitation) are associated with infectious diseases (e.g. tick borne diseases, tularemia) in the Arctic.                                                                                                                                         |
| 81 | Wald        | 2019 | United States | 2009-2018 | NS        | 17 | No  | United States      |                               | Meteorological          | Health systems                                                                                               | Higher temperature is associated with emergency department (heat-related visits) visits and costs for healthcare systems.                                                                                                                                                                                     |
| 82 | Welch       | 2019 | United States | NS        | NS        | 91 | No  |                    |                               | Meteorological          | Infectious diseases                                                                                          | Meteorological factors (temperature, precipitation) are associated with Salmonella.                                                                                                                                                                                                                           |
| 83 | Wimalawansa | 2016 | United States | NS        | NS        | NS | No  | Tropical Countries | Workers                       | Meteorological<br>Other | Occupational health and injuries                                                                             | Increasing temperatures and environmental pollution (e.g., heavy metals, fertilizers) are associated with occupational health outcomes, such as chronic kidney disease of multifactorial origin.                                                                                                              |
| 84 | Witt        | 2015 | Germany       | NS        | NS        | 33 | Yes |                    | Chronic lung disease patients | Meteorological          | Mortality<br>Respiratory, cardiovascular, and neurological outcomes                                          | Heat is associated with lung disease outcomes and mortality in patients with chronic lung diseases.                                                                                                                                                                                                           |
| 85 | Xu          | 2018 | Australia     | 2004-2016 | 1978-2013 | 19 | No  |                    | Children                      | Meteorological          | Respiratory, cardiovascular, and neurological outcomes                                                       | Heat and cold temperatures are associated with childhood asthma.                                                                                                                                                                                                                                              |
| 86 | Xu          | 2012 | Australia     | 2000-2012 | 1983-2010 | 33 | No  |                    | Children                      | Meteorological          | Infectious diseases<br>Mortality<br>Respiratory, cardiovascular, and neurological outcomes<br>Health systems | Heat and cold are associated with hospital admissions and mortality in children. Temperature is also associated with various infectious diseases (e.g., HFMD, malaria), respiratory diseases (e.g., asthma) and skin outcomes (e.g. eczema). For example, high temperature is associated with Hand Foot Mouth |

|    |         |      |           |           |                        |    |     |  |          |                |                                                                                                              |                                                                                                                                                                                                                           |
|----|---------|------|-----------|-----------|------------------------|----|-----|--|----------|----------------|--------------------------------------------------------------------------------------------------------------|---------------------------------------------------------------------------------------------------------------------------------------------------------------------------------------------------------------------------|
|    |         |      |           |           |                        |    |     |  |          |                | Skin diseases and allergies<br>Other                                                                         | Disease and renal diseases and low temperature is associated with eczema.                                                                                                                                                 |
| 87 | Xu      | 2016 | Australia | 2001-2015 | NS                     | 60 | Yes |  |          | Meteorological | Mortality                                                                                                    | Heat waves are associated with mortality and it seems that the intensity of heatwaves is particularly important compared to length of heatwave.                                                                           |
| 88 | Xu      | 2014 | Australia | 1998-2012 | 1983-2009              | 12 | No  |  | Children | Meteorological | Mortality<br>Respiratory, cardiovascular, and neurological outcomes<br>Health systems<br>Other               | Heat waves are associated with hospital admissions, respiratory diseases, renal diseases, fever and electrolyte imbalances. Evidence concerning the association between heatwaves and children mortality is inconsistent. |
| 89 | Youssef | 2014 | France    | 1990-2011 | 1987-2008              | 94 | No  |  |          | Air quality    | Mortality<br>Respiratory, cardiovascular, and neurological outcomes<br>Health systems<br>Pregnancy and birth | Wildfire smoke exposure is associated with mortality, respiratory and cardiovascular outcomes, hospital admissions. Wildfire smoke exposure may also be associated with adverse birth outcomes (low birth weight).        |
| 90 | Yu      | 2015 | Australia | 1998-2012 | 1961-1990 et 2020-2100 | 20 | No  |  |          | Meteorological | Infectious diseases                                                                                          | Meteorological factors (temperature, rainfall, humidity) may be associated with future malaria transmission, although findings are inconsistent, partly according to geographical focus.                                  |
| 91 | Yu      | 2012 | Australia | 1997-2008 | 1973-2006              | 15 | Yes |  | Elderly  | Meteorological | Mortality                                                                                                    | Heat and cold temperatures are associated with mortality for the elderly, although heat-related associations seem stronger than cold-related associations.                                                                |

|    |       |      |           |           |           |     |    |  |                          |                |                                                                                                                                                |                                                                                                                                                                                                                                                                                                                   |
|----|-------|------|-----------|-----------|-----------|-----|----|--|--------------------------|----------------|------------------------------------------------------------------------------------------------------------------------------------------------|-------------------------------------------------------------------------------------------------------------------------------------------------------------------------------------------------------------------------------------------------------------------------------------------------------------------|
| 92 | Zhang | 2007 | Australia | NS        | NS        | NS  | No |  | People with disabilities | General        | Other                                                                                                                                          | Climate change, in general, may be associated with disability-adjusted life years (DALY), and the cost of DALY could be particularly important in low to middle income countries.                                                                                                                                 |
| 93 | Zhang | 2017 | China     | 1997-2016 | 1981-2012 | 36  | No |  | Pregnant people          | Meteorological | Pregnancy and birth                                                                                                                            | High temperature is associated with adverse birth outcomes, such as preterm birth, low birth weight and stillbirth. Low temperature is also associated with some adverse birth outcomes, including preterm birth and low birth, although the evidence is stronger for high temperature than for low temperatures. |
| 94 | Zuo   | 2015 | Australia | NS        | NS        | 173 | No |  |                          | Meteorological | Mortality<br>Respiratory, cardiovascular, and neurological outcomes<br>Health systems<br>Mental health<br>Skin diseases and allergies<br>Other | Heat waves are associated with mortality, hospital admissions, sunburn, heat exhaustion, cardiovascular outcomes (e.g., heart attacks) and mental health outcomes.                                                                                                                                                |

\*NS = non-specified
