# Supplementary material for: Health effects of climate change: an overview of systematic reviews
Source: PubMed Central journal article supplement — BMJ Open. 2021 Jun 9;11(6):e046333. doi: 10.1136/bmjopen-2020-046333 (PMC8191619; doi:10.1136/bmjopen-2020-046333), 2021-06-09
Supplement: bmjopen-2020-046333supp004.pdf [file bmjopen-2020-046333supp004.pdf]

**Appendix 4.** Summary of quality assessment according to revised AMSTAR-2 items. (Y = yes, PY = partial yes, N = no, NA = non-applicable).

| First author | Year | AMSTAR-2 Items |    |   |    |    |   |    |    |    |    |    |    |    |    |    |    |    |
|--------------|------|----------------|----|---|----|----|---|----|----|----|----|----|----|----|----|----|----|----|
|              |      | 1              | 1b | 2 | 3  | 4  | 5 | 6  | 7  | 8  | 9  | 10 | 11 | 12 | 13 | 14 | 15 | 16 |
| Alderman     | 2012 | Y              | N  | N | PY | PY | N | N  | PY | PY | N  | N  | NA | NA | Y  | N  | NA | N  |
| Amegah       | 2016 | Y              | N  | N | Y  | PY | N | N  | PY | Y  | Y  | N  | NA | NA | Y  | Y  | NA | Y  |
| An           | 2018 | N              | Y  | N | N  | PY | Y | N  | Y  | N  | Y  | N  | NA | NA | Y  | N  | NA | Y  |
| Augustin     | 2008 | Y              | Y  | N | N  | PY | N | N  | PY | N  | PY | N  | NA | NA | Y  | N  | NA | Y  |
| Babaie       | 2018 | Y              | Y  | N | N  | PY | Y | N  | Y  | PY | N  | N  | NA | NA | N  | N  | NA | N  |
| Bai          | 2013 | Y              | Y  | N | PY | PY | N | N  | PY | PY | Y  | N  | NA | NA | Y  | N  | NA | Y  |
| Benevolenza  | 2019 | Y              | Y  | N | PY | N  | N | N  | Y  | PY | PY | N  | NA | NA | Y  | N  | NA | N  |
| Berhane      | 2016 | Y              | N  | Y | N  | N  | N | N  | N  | PY | PY | N  | NA | NA | Y  | N  | NA | N  |
| Bernhardt    | 2019 | Y              | N  | N | N  | N  | N | N  | PY | PY | PY | N  | NA | NA | PY | N  | NA | Y  |
| Binazzi      | 2019 | Y              | Y  | N | Y  | PY | Y | N  | Y  | Y  | Y  | N  | Y  | Y  | Y  | Y  | Y  | Y  |
| Bonafede     | 2016 | Y              | N  | N | PY | PY | Y | N  | Y  | Y  | Y  | N  | NA | NA | Y  | Y  | NA | Y  |
| Brown        | 2013 | Y              | Y  | N | PY | PY | N | N  | Y  | Y  | PY | N  | NA | NA | Y  | Y  | NA | Y  |
| Bunker       | 2016 | Y              | Y  | N | Y  | N  | Y | PY | Y  | Y  | PY | N  | Y  | Y  | Y  | Y  | Y  | Y  |
| Campbell     | 2018 | Y              | N  | N | N  | PY | N | N  | Y  | PY | N  | N  | NA | NA | Y  | PY | NA | Y  |
| Cann         | 2013 | Y              | Y  | Y | PY | PY | N | N  | Y  | PY | PY | N  | NA | NA | Y  | Y  | NA | Y  |
| Carolan-Olah | 2014 | Y              | Y  | N | N  | PY | N | N  | Y  | PY | Y  | N  | NA | NA | PY | PY | NA | N  |
| Cheng        | 2014 | Y              | N  | N | PY | PY | N | N  | Y  | Y  | Y  | N  | NA | NA | Y  | PY | NA | N  |
| Coates       | 2019 | N              | N  | N | N  | N  | N | N  | PY | PY | Y  | N  | NA | NA | Y  | PY | NA | N  |
| Cong         | 2017 | N              | Y  | N | N  | PY | N | Y  | Y  | Y  | Y  | N  | Y  | N  | Y  | Y  | Y  | Y  |
| Cunrui       | 2011 | Y              | N  | N | PY | PY | N | N  | Y  | PY | N  | N  | NA | NA | Y  | N  | NA | Y  |
| deSousa      | 2018 | Y              | N  | N | PY | PY | N | N  | Y  | N  | N  | N  | NA | NA | Y  | N  | NA | Y  |
| Dhimal       | 2015 | Y              | Y  | N | PY | PY | N | N  | Y  | Y  | N  | N  | NA | NA | N  | N  | NA | N  |
| Doocy        | 2013 | Y              | N  | N | N  | PY | Y | N  | Y  | Y  | N  | N  | NA | NA | Y  | PY | NA | Y  |
| Duan         | 2019 | Y              | N  | N | N  | PY | N | N  | Y  | PY | Y  | N  | Y  | Y  | Y  | Y  | Y  | Y  |
| Fan          | 2015 | N              | Y  | N | N  | PY | Y | Y  | PY | PY | Y  | N  | Y  | Y  | Y  | Y  | Y  | Y  |
| Fernandez    | 2015 | Y              | Y  | N | PY | PY | Y | N  | Y  | PY | PY | N  | NA | NA | Y  | N  | NA | N  |
| Flouris      | 2018 | Y              | N  | Y | PY | PY | Y | Y  | Y  | Y  | Y  | Y  | Y  | Y  | Y  | Y  | Y  | Y  |

|             |      |   |   |   |    |    |   |    |    |    |    |   |    |    |   |    |    |   |
|-------------|------|---|---|---|----|----|---|----|----|----|----|---|----|----|---|----|----|---|
| Gao         | 2019 | N | Y | N | PY | PY | Y | N  | Y  | Y  | Y  | N | Y  | Y  | Y | Y  | Y  | Y |
| Gao         | 2014 | Y | N | N | PY | PY | N | PY | Y  | Y  | Y  | N | NA | NA | Y | Y  | NA | Y |
| Ghanizadeh  | 2017 | N | Y | N | PY | N  | Y | PY | Y  | PY | Y  | N | NA | NA | N | N  | NA | Y |
| Ghazani     | 2018 | N | N | N | N  | PY | Y | N  | Y  | Y  | PY | N | NA | NA | Y | PY | NA | Y |
| Gracia      | 2015 | Y | Y | N | PY | PY | Y | N  | Y  | PY | Y  | N | NA | NA | Y | N  | NA | Y |
| Hajat       | 2010 | Y | N | N | Y  | PY | N | N  | Y  | PY | N  | N | NA | NA | N | PY | NA | Y |
| Hedlund     | 2014 | Y | N | N | PY | N  | Y | Y  | Y  | PY | Y  | N | NA | NA | Y | N  | NA | Y |
| Hii         | 2016 | Y | N | N | PY | PY | N | N  | PY | PY | N  | N | NA | NA | N | N  | NA | Y |
| Huang       | 2016 | N | N | N | N  | PY | Y | N  | PY | Y  | Y  | N | Y  | Y  | Y | PY | N  | Y |
| Kampe       | 2016 | Y | N | N | PY | PY | Y | N  | Y  | Y  | PY | N | NA | NA | Y | N  | NA | Y |
| Khader      | 2015 | Y | N | N | PY | PY | Y | N  | Y  | Y  | N  | N | NA | NA | Y | PY | NA | Y |
| Klinger     | 2014 | N | N | N | N  | PY | Y | N  | Y  | N  | Y  | N | NA | NA | Y | N  | NA | Y |
| Kuehn       | 2017 | Y | N | N | N  | PY | N | N  | Y  | Y  | PY | N | NA | NA | Y | N  | NA | Y |
| Lake        | 2017 | Y | Y | N | N  | PY | Y | Y  | PY | PY | N  | N | NA | NA | N | N  | NA | Y |
| Lal         | 2019 | Y | N | Y | N  | PY | N | Y  | Y  | PY | Y  | N | Y  | Y  | Y | Y  | N  | Y |
| Lal         | 2015 | Y | Y | N | N  | PY | N | N  | Y  | PY | PY | N | NA | NA | Y | PY | NA | Y |
| Lawton      | 2019 | Y | N | N | PY | PY | N | N  | Y  | Y  | N  | N | NA | NA | Y | N  | NA | Y |
| Levi        | 2018 | Y | Y | N | PY | PY | Y | N  | Y  | Y  | N  | N | NA | NA | Y | PY | NA | Y |
| Levy        | 2016 | N | N | N | PY | PY | Y | PY | Y  | Y  | Y  | N | NA | NA | Y | Y  | NA | Y |
| Leyva       | 2017 | Y | Y | N | PY | PY | N | N  | Y  | N  | Y  | N | NA | NA | Y | N  | NA | N |
| Li          | 2018 | Y | N | N | N  | PY | N | N  | N  | PY | N  | N | NA | NA | N | N  | NA | Y |
| Lian        | 2015 | Y | N | N | PY | PY | Y | Y  | Y  | N  | Y  | N | Y  | Y  | Y | Y  | Y  | Y |
| Liu         | 2015 | Y | Y | N | Y  | PY | N | N  | Y  | Y  | PY | N | NA | NA | Y | PY | NA | Y |
| Madaniyazi  | 2015 | N | N | N | PY | PY | N | N  | Y  | PY | N  | N | NA | NA | Y | N  | NA | Y |
| Matysiak    | 2017 | Y | Y | N | PY | PY | N | N  | Y  | PY | Y  | N | NA | NA | Y | N  | NA | Y |
| Moghadamnia | 2017 | Y | N | N | PY | PY | Y | N  | Y  | Y  | Y  | N | Y  | N  | Y | Y  | N  | Y |
| Naish       | 2014 | Y | Y | N | PY | PY | N | N  | PY | PY | PY | N | NA | NA | Y | N  | NA | Y |
| Nichols     | 2009 | Y | N | N | PY | PY | Y | Y  | Y  | Y  | N  | N | NA | NA | N | N  | NA | Y |
| Odame       | 2018 | Y | N | N | PY | PY | N | N  | PY | PY | N  | N | Y  | N  | Y | Y  | Y  | Y |
| Park        | 2017 | Y | N | N | N  | PY | Y | Y  | N  | PY | Y  | N | Y  | PY | Y | Y  | N  | Y |
| Phalkey     | 2015 | Y | Y | N | PY | PY | Y | Y  | Y  | PY | PY | N | NA | NA | Y | N  | NA | Y |

|             |      |   |   |   |    |    |   |   |    |    |    |   |    |    |   |    |    |   |
|-------------|------|---|---|---|----|----|---|---|----|----|----|---|----|----|---|----|----|---|
| Philipsborn | 2016 | Y | Y | N | PY | N  | N | N | Y  | PY | N  | N | Y  | Y  | N | Y  | N  | Y |
| Phung       | 2015 | Y | Y | N | N  | PY | N | N | Y  | Y  | PY | Y | NA | NA | N | N  | NA | Y |
| Porpora     | 2019 | Y | Y | Y | PY | PY | N | N | Y  | PY | N  | N | NA | NA | N | Y  | NA | Y |
| Poursafa    | 2015 | Y | N | N | PY | PY | Y | Y | PY | Y  | PY | N | NA | NA | Y | Y  | NA | Y |
| Racloz      | 2012 | Y | N | N | N  | PY | N | N | N  | PY | N  | N | NA | NA | Y | Y  | NA | Y |
| Rataj       | 2016 | Y | Y | Y | PY | PY | Y | Y | PY | PY | Y  | N | NA | NA | Y | Y  | NA | Y |
| Reid        | 2016 | Y | N | N | PY | PY | N | N | N  | PY | PY | N | NA | NA | Y | PY | NA | Y |
| Rifkin      | 2018 | Y | Y | Y | PY | PY | Y | Y | Y  | PY | N  | N | NA | NA | Y | N  | NA | Y |
| Salve       | 2018 | Y | Y | N | N  | PY | Y | Y | PY | PY | N  | N | NA | NA | Y | N  | NA | Y |
| Sanderson   | 2017 | Y | Y | N | N  | PY | Y | N | Y  | PY | PY | N | NA | NA | Y | N  | NA | Y |
| Sawatzky    | 2018 | Y | Y | N | N  | PY | Y | N | Y  | N  | N  | N | NA | NA | N | N  | NA | Y |
| Semenza     | 2012 | N | N | N | N  | N  | N | N | N  | N  | Y  | N | NA | NA | N | N  | NA | N |
| Stanke      | 2013 | Y | N | N | PY | PY | N | N | Y  | PY | N  | N | NA | NA | Y | N  | NA | Y |
| Stensgaard  | 2019 | Y | Y | N | N  | PY | N | Y | N  | PY | N  | N | NA | NA | N | N  | NA | Y |
| Sun         | 2018 | Y | Y | N | PY | PY | N | Y | Y  | Y  | Y  | N | Y  | Y  | Y | Y  | Y  | Y |
| Swynghedauw | 2009 | Y | Y | N | N  | N  | N | N | N  | N  | N  | N | NA | NA | N | N  | NA | Y |
| Tall        | 2014 | Y | N | N | N  | PY | N | N | Y  | Y  | PY | N | NA | NA | Y | N  | NA | Y |
| Varghese    | 2018 | Y | N | N | N  | PY | N | N | Y  | Y  | N  | N | NA | NA | Y | N  | NA | Y |
| Veenema     | 2017 | Y | N | Y | N  | PY | N | N | Y  | N  | PY | N | NA | NA | N | N  | NA | N |
| Vilcins     | 2018 | Y | N | Y | N  | PY | N | N | Y  | N  | Y  | N | NA | NA | Y | N  | NA | Y |
| Vins        | 2015 | Y | Y | N | N  | PY | N | N | Y  | N  | N  | N | NA | NA | Y | PY | NA | Y |
| Waits       | 2018 | Y | Y | N | N  | PY | N | N | Y  | N  | N  | N | NA | NA | N | N  | NA | Y |
| Wald        | 2019 | Y | N | N | N  | PY | N | N | Y  | Y  | N  | N | NA | NA | Y | N  | NA | N |
| Welch       | 2019 | Y | Y | N | N  | N  | N | N | PY | PY | N  | N | NA | NA | N | N  | NA | N |
| Wimalawansa | 2016 | Y | N | N | N  | N  | N | N | N  | N  | N  | N | NA | NA | N | N  | NA | Y |
| Witt        | 2015 | Y | N | N | N  | PY | N | N | Y  | N  | N  | N | N  | Y  | Y | N  | N  | Y |
| Xu          | 2018 | Y | N | N | PY | PY | N | N | PY | PY | N  | N | NA | NA | Y | N  | NA | Y |
| Xu          | 2012 | Y | N | N | PY | PY | N | N | PY | Y  | PY | N | NA | NA | N | N  | NA | Y |
| Xu          | 2016 | Y | N | N | PY | PY | N | N | Y  | Y  | N  | N | Y  | N  | Y | Y  | N  | Y |
| Xu          | 2014 | Y | Y | N | N  | PY | N | N | Y  | Y  | N  | N | NA | NA | N | Y  | NA | N |
| Youssef     | 2014 | Y | Y | N | PY | PY | N | N | Y  | Y  | N  | N | NA | NA | Y | N  | NA | Y |

|       |                        |    |    |    |    |    |    |    |    |    |    |    |    |    |    |    |    |    |
|-------|------------------------|----|----|----|----|----|----|----|----|----|----|----|----|----|----|----|----|----|
| Yu    | 2015                   | N  | N  | N  | PY | PY | N  | N  | Y  | Y  | N  | N  | NA | NA | Y  | PY | NA | Y  |
| Yu    | 2012                   | Y  | Y  | N  | PY | N  | N  | Y  | Y  | Y  | N  | N  | Y  | N  | Y  | Y  | Y  | Y  |
| Zhang | 2007                   | Y  | N  | N  | N  | N  | N  | N  | N  | N  | N  | N  | NA | NA | Y  | N  | NA | N  |
| Zhang | 2017                   | Y  | Y  | N  | PY | PY | N  | N  | PY | Y  | Y  | N  | NA | NA | Y  | Y  | NA | Y  |
| Zuo   | 2015                   | Y  | Y  | N  | N  | PY | N  | N  | N  | N  | N  | N  | NA | NA | N  | N  | NA | Y  |
| TOTAL | Yes                    | 81 | 44 | 9  | 5  | 0  | 32 | 17 | 64 | 36 | 31 | 2  | 17 | 12 | 70 | 28 | 11 | 78 |
|       | Partial<br>Yes         | 0  | 0  | 0  | 47 | 80 | 0  | 4  | 19 | 41 | 22 | 0  | 0  | 1  | 2  | 15 | 0  | 0  |
|       | No                     | 13 | 50 | 85 | 42 | 14 | 62 | 73 | 11 | 17 | 41 | 92 | 1  | 5  | 22 | 51 | 7  | 16 |
|       | Not-<br>Applic<br>able | 0  | 0  | 0  | 0  | 0  | 0  | 0  | 0  | 0  | 0  | 0  | 0  | 76 | 76 | 0  | 0  | 76 |
