# Supplementary material for: Health effects of climate change: an overview of systematic reviews
Source: PubMed Central journal article supplement — BMJ Open. 2021 Jun 9;11(6):e046333. doi: 10.1136/bmjopen-2020-046333 (PMC8191619; doi:10.1136/bmjopen-2020-046333), 2021-06-09
Supplement: bmjopen-2020-046333supp005.pdf [file bmjopen-2020-046333supp005.pdf]

**Appendix 5.** Summary table of publications according to climate impact and health outcome according to frequencies and references. References with a \* explore only this specific combination of climate impact and health outcome and therefore appear only once in this table. Number of studies and references (according to alphabetical order) for each combination of categories are presented in the cells. Empty cells in this Table indicate an absence of studies at this combination of categories.

| Health Outcome                                     | Climate Impact                                                                                                                                                                                                                                                                                                                   |                                                                                                                                |                                                         |                   |           |
|----------------------------------------------------|----------------------------------------------------------------------------------------------------------------------------------------------------------------------------------------------------------------------------------------------------------------------------------------------------------------------------------|--------------------------------------------------------------------------------------------------------------------------------|---------------------------------------------------------|-------------------|-----------|
|                                                    | Meteorological (71)                                                                                                                                                                                                                                                                                                              | Extreme weather (24)                                                                                                           | Air quality (7)                                         | General (5)       | Other (3) |
| Infectious diseases (41)                           | <b>35</b><br>Amegah, Babaie*, Bai*, Berhane, Bernhardt*, Cheng, Coates*, de Sousa, Dhimal*, Duan*, Fan*, Gao 2014, Ghazani*, Gracia*, Hedlund, Hii*, Khader, Lal 2015*, Lal 2019*, Levy, Leyva, Li, Matysiak, Naish*, Nichols, Philipsborn*, Phung, Racloz*, Semenza*, Stensgaard, Swynghedau, Waits*, Welch*, Xu 2012, Yu 2015* | <b>14</b><br>Alderman, Berhane, Brown*, Cann*, Hedlund, Levy, Li, Matysiak, Nichols, Phung, Stanke, Swynghedau, Tall*, Veenema |                                                         |                   |           |
| Mortality (32)                                     | <b>24</b><br>Amegah, Bunker, Campbell, Cheng, Cunrui*, Ghanizadeh, Hajat*, Khader, Lawton, Leyva, Lian, Moghdamnia*, Nichols, Odame*, Salve, Sanderson*, Sun, Swynghedau, Witt, Xu 2012, Xu 2014, Xu 2016*, Yu 2012*, Zuo                                                                                                        | <b>5</b><br>Alderman, Doocy, Leyva, Stanke, Veenema                                                                            | <b>5</b><br>Leyva, Liu, Madniyazi*, Reid, Youssouf      |                   |           |
| Respiratory, cardiovascular, and neurological (23) | <b>17</b><br>Amegah, Bunker, Cheng, Cong*, de Sousa, Gao 2014, Ghanizadeh, Lawton, Leyva, Lian, Nichols, Sun, Witt, Xu 2012, Xu 2014, Xu 2018*, Zuo                                                                                                                                                                              | <b>1</b><br>Stanke                                                                                                             | <b>6</b><br>Khader, Leyva, Liu, Nichols, Reid, Youssouf | <b>1</b><br>Lake* |           |

|                                      |                                                                                                |                                                                                              |                                 |                         |                        |
|--------------------------------------|------------------------------------------------------------------------------------------------|----------------------------------------------------------------------------------------------|---------------------------------|-------------------------|------------------------|
| Health systems (16)                  | <b>11</b><br>Amegah, Campbell, Cheng, Khader, Leyva, Salve, Sun, Wald*, Xu 2012, Xu 2014, Zuo  | <b>2</b><br>Alderman, Klingner*                                                              | <b>2</b><br>Liu, Youssouf       | <b>1</b><br>Sawatzky*   |                        |
| Mental Health (13)                   | <b>3</b><br>Gao 2019*, Khader, Zuo                                                             | <b>9</b><br>Alderman, Benevolenza, Fernandez*, Leyva, Nichols, Rataj, Stanke, Veenema, Vins* | <b>1</b><br>Reid                |                         |                        |
| Pregnancy and birth outcomes (11)    | <b>5</b><br>Carolan-Olah*, Kuehn*, Poursafa*, Khader, Zhang 2017*                              | <b>2</b><br>Alderman, Benevolenza                                                            | <b>3</b><br>Liu, Reid, Youssouf |                         | <b>1</b><br>Porpora*   |
| Nutritional (9)                      | <b>4</b><br>Amegah, Khader, Phalkey, Salve                                                     | <b>6</b><br>Berhane, Khader, Nichols, Phalkey, Stanke, Swynghedauw                           |                                 | <b>1</b><br>An*         | <b>1</b><br>Vilcins*   |
| Skin diseases and allergies (8)      | <b>7</b><br>Amegah, Augustin*, Nichols, Gao 2014, Swynghedauw, Xu 2012, Zuo                    |                                                                                              |                                 | <b>1</b><br>Huang*      |                        |
| Occupational health and injuries (6) | <b>6</b><br>Binazzi*, Bonafede*, Flouris*, Levi*, Varghese*, Wimalawans                        |                                                                                              |                                 |                         | <b>1</b><br>Wimalawans |
| Other (17)                           | <b>10</b><br>Bunker, Cheng, Kampe*, Nichols, Park*, Rifkin, Swynghedauw, Xu 2012, Xu 2014, Zuo | <b>6</b><br>Alderman, Benevolenza, Doocy, Rataj, Rifkin, Stanke                              | <b>1</b><br>Liu                 | <b>1</b><br>Zhang 2007* |                        |
